# Supplementary material for: Reinforcing the North Atlantic backbone: revision and extension of the composite splice at ODP Site 982
Source: Copernicus journal article supplement (doi:10.5194/cp-2017-108), 2017-09-28
Supplement: Supplementary file 1 [file ST1 XRF data (29.08.2017).xlsx]

## Sheet: Site 982 XRF data splice
IODP-ID	mbsf	mcd (shipboard)	rmcd (this study)	AgeD17MT (this study)	AgeD17FT (this study)	Silica (counts)	Zirconium (counts)	ln(Silica) (counts)
162-982A-12H-3-W 44	106.64	120.13	120.13	4.4786	4.4786	1456	15	3.16316
162-982A-12H-3-W 46	106.66	120.15	120.15	4.47915	4.47915	1671	90	3.22298
162-982A-12H-3-W 48.5	106.69	120.18	120.18	4.47998	4.47998	1345	81	3.12872
162-982A-12H-3-W 51	106.71	120.2	120.2	4.48053	4.48053	1371	35	3.13704
162-982A-12H-3-W 54	106.74	120.23	120.23	4.48135	4.48135	1328	161	3.1232
162-982A-12H-3-W 57	106.77	120.26	120.26	4.48218	4.48218	1282	99	3.10789
162-982A-12H-3-W 59	106.79	120.28	120.28	4.48273	4.48273	1194	72	3.077
162-982A-12H-3-W 60	106.8	120.29	120.29	4.48301	4.48301	1040	58	3.01703
162-982A-12H-3-W 62	106.82	120.31	120.31	4.48356	4.48356	1304	58	3.11528
162-982A-12H-3-W 64	106.84	120.33	120.33	4.48411	4.48411	1341	34	3.12743
162-982A-12H-3-W 65	106.85	120.34	120.34	4.48439	4.48439	1466	34	3.16613
162-982A-12H-3-W 67.5	106.88	120.37	120.37	4.48521	4.48521	1342	75	3.12775
162-982A-12H-3-W 70	106.9	120.39	120.39	4.48576	4.48576	1356	62	3.13226
162-982A-12H-3-W 72	106.92	120.41	120.41	4.48632	4.48632	1379	39	3.13956
162-982A-12H-3-W 73	106.93	120.42	120.42	4.48659	4.48659	1335	31	3.12548
162-982A-12H-3-W 77	106.97	120.46	120.46	4.48769	4.48769	1463	39	3.16524
162-982A-12H-3-W 79	106.99	120.48	120.48	4.48825	4.48825	1416	154	3.15106
162-982A-12H-3-W 81	107.01	120.5	120.5	4.4888	4.4888	1253	51	3.09795
162-982A-12H-3-W 82	107.02	120.51	120.51	4.48907	4.48907	1401	110	3.14644
162-982A-12H-3-W 84	107.04	120.53	120.53	4.48962	4.48962	1228	11	3.0892
162-982A-12H-3-W 90	107.1	120.59	120.59	4.49128	4.49128	1220	73	3.08636
162-982A-12H-3-W 91	107.11	120.6	120.6	4.49155	4.49155	1251	26	3.09726
162-982A-12H-3-W 92	107.12	120.61	120.61	4.49183	4.49183	1236	9	3.09202
162-982A-12H-3-W 93	107.13	120.62	120.62	4.4921	4.4921	1364	65	3.13481
162-982A-12H-3-W 95	107.15	120.64	120.64	4.49266	4.49266	1151	69	3.06108
162-982A-12H-3-W 100	107.2	120.69	120.69	4.49403	4.49403	1283	34	3.10823
162-982A-12H-3-W 102	107.22	120.71	120.71	4.49458	4.49458	1412	34	3.14983
162-982A-12H-3-W 103	107.23	120.72	120.72	4.49486	4.49486	1352	87	3.13098
162-982A-12H-3-W 105	107.25	120.74	120.74	4.49541	4.49541	1212	71	3.0835
162-982A-12H-3-W 109	107.29	120.78	120.78	4.49651	4.49651	1178	68	3.07115
162-982A-12H-3-W 110	107.3	120.79	120.79	4.49679	4.49679	1162	101	3.06521
162-982A-12H-3-W 112	107.32	120.81	120.81	4.49734	4.49734	1243	116	3.09447
162-982A-12H-3-W 114	107.34	120.83	120.83	4.49789	4.49789	1151	44	3.06108
162-982A-12H-3-W 119	107.39	120.88	120.88	4.49927	4.49927	1208	23	3.08207
162-982A-12H-3-W 120	107.4	120.89	120.89	4.49955	4.49955	1041	38	3.01745
162-982A-12H-3-W 122	107.42	120.91	120.91	4.5001	4.5001	1178	96	3.07115
162-982A-12H-3-W 123	107.43	120.92	120.92	4.50037	4.50037	1155	65	3.06258
162-982A-12H-3-W 125	107.45	120.94	120.94	4.50092	4.50092	1256	68	3.09899
162-982A-12H-3-W 128	107.48	120.97	120.97	4.50175	4.50175	1284	68	3.10857
162-982A-12H-3-W 130	107.5	120.99	120.99	4.5023	4.5023	1322	33	3.12123
162-982A-12H-3-W 131	107.51	121	121	4.50258	4.50258	1358	1	3.1329
162-982A-12H-3-W 132	107.52	121.01	121.01	4.50285	4.50285	1635	98	3.21352
162-982A-12H-3-W 134	107.54	121.03	121.03	4.50341	4.50341	1198	39	3.07846
162-982A-12H-3-W 136	107.56	121.05	121.05	4.50396	4.50396	1362	89	3.13418
162-982A-12H-3-W 138	107.58	121.07	121.07	4.50451	4.50451	1101	61	3.04179
162-982A-12H-3-W 140	107.6	121.09	121.09	4.50506	4.50506	1380	90	3.13988
162-982A-12H-3-W 142	107.62	121.11	121.11	4.50561	4.50561	1294	85	3.11193
162-982A-12H-3-W 145	107.65	121.14	121.14	4.50644	4.50644	1514	93	3.18013
162-982A-12H-3-W 146	107.66	121.15	121.15	4.50671	4.50671	1425	105	3.15381
162-982A-12H-3-W 149	107.69	121.18	121.18	4.50754	4.50754	1379	86	3.13956
162-982A-12H-4-W 2	107.72	121.21	121.21	4.50837	4.50837	1326	26	3.12254
162-982A-12H-4-W 8.5	107.79	121.28	121.28	4.5103	4.5103	1387	124	3.14208
162-982A-12H-4-W 10.5	107.81	121.3	121.3	4.51085	4.51085	1836	119	3.26387
162-982A-12H-4-W 12.5	107.83	121.32	121.32	4.5114	4.5114	1422	-5	3.1529
162-982A-12H-4-W 14	107.84	121.33	121.33	4.51167	4.51167	1516	66	3.1807
162-982A-12H-4-W 18	107.88	121.37	121.37	4.51278	4.51278	1380	48	3.13988
162-982A-12H-4-W 21	107.91	121.4	121.4	4.5136	4.5136	1515	100	3.18041
162-982A-12H-4-W 22	107.92	121.41	121.41	4.51388	4.51388	1462	34	3.16495
162-982A-12H-4-W 23	107.93	121.42	121.42	4.51415	4.51415	1413	73	3.15014
162-982A-12H-4-W 25	107.95	121.44	121.44	4.51471	4.51471	1535	90	3.18611
162-982A-12H-4-W 26	107.96	121.45	121.45	4.51498	4.51498	1423	48	3.1532
162-982A-12H-4-W 28	107.98	121.47	121.47	4.51553	4.51553	1389	51	3.1427
162-982A-12H-4-W 29	107.99	121.48	121.48	4.51581	4.51581	1468	110	3.16673
162-982A-12H-4-W 30	108	121.49	121.49	4.51608	4.51608	1332	92	3.1245
162-982A-12H-4-W 31	108.01	121.5	121.5	4.51636	4.51636	1479	65	3.16997
162-982A-12H-4-W 33	108.03	121.52	121.52	4.51691	4.51691	1239	31	3.09307
162-982A-12H-4-W 36	108.06	121.55	121.55	4.51774	4.51774	1392	98	3.14364
162-982A-12H-4-W 38	108.08	121.57	121.57	4.51829	4.51829	1166	87	3.0667
162-982A-12H-4-W 40	108.1	121.59	121.59	4.51884	4.51884	1263	110	3.1014
162-982A-12H-4-W 43	108.13	121.62	121.62	4.51967	4.51967	1101	39	3.04179
162-982A-12H-4-W 44	108.14	121.63	121.63	4.51994	4.51994	1014	-18	3.00604
162-982A-12H-4-W 46	108.16	121.65	121.65	4.52049	4.52049	1077	38	3.03222
162-982A-12H-4-W 48	108.18	121.67	121.67	4.52105	4.52105	1147	85	3.05956
162-982A-12H-4-W 51	108.21	121.7	121.7	4.52187	4.52187	1440	123	3.15836
162-982A-12H-4-W 52	108.22	121.71	121.71	4.52215	4.52215	1157	42	3.06333
162-982A-12H-4-W 56	108.26	121.75	121.75	4.52325	4.52325	1293	66	3.1116
162-982A-12H-4-W 59	108.29	121.78	121.78	4.52408	4.52408	1062	26	3.02612
162-982A-12H-4-W 60	108.3	121.79	121.79	4.52435	4.52435	1173	25	3.0693
162-982A-12H-4-W 61	108.31	121.8	121.8	4.52463	4.52463	1229	77	3.08955
162-982A-12H-4-W 63	108.33	121.82	121.82	4.52518	4.52518	1284	80	3.10857
162-982A-12H-4-W 65	108.35	121.84	121.84	4.52573	4.52573	1182	41	3.07262
162-982A-12H-4-W 68.5	108.39	121.88	121.88	4.52683	4.52683	1198	55	3.07846
162-982A-12H-4-W 69.5	108.4	121.89	121.89	4.52711	4.52711	1360	53	3.13354
162-982A-12H-4-W 71.5	108.42	121.91	121.91	4.52766	4.52766	1241	74	3.09377
162-982A-12H-4-W 74	108.44	121.93	121.93	4.52821	4.52821	1185	52	3.07372
162-982A-12H-4-W 75	108.45	121.94	121.94	4.52849	4.52849	1333	94	3.12483
162-982A-12H-4-W 78	108.48	121.97	121.97	4.52931	4.52931	1385	99	3.14145
162-982A-12H-4-W 79	108.49	121.98	121.98	4.52959	4.52959	1376	50	3.13862
162-982A-12H-4-W 81.5	108.52	122.01	122.01	4.53042	4.53042	1327	55	3.12287
162-982A-12H-4-W 84	108.54	122.03	122.03	4.53097	4.53097	1398	47	3.14551
162-982A-12H-4-W 89	108.59	122.08	122.08	4.53235	4.53235	1259	99	3.10003
162-982A-12H-4-W 90	108.6	122.09	122.09	4.53262	4.53262	1422	22	3.1529
162-982A-12H-4-W 92	108.62	122.11	122.11	4.53317	4.53317	1469	78	3.16702
162-982A-12H-4-W 93	108.63	122.12	122.12	4.53345	4.53345	1406	99	3.14799
162-982A-12H-4-W 97	108.67	122.16	122.16	4.53455	4.53455	1306	82	3.11594
162-982A-12H-4-W 98	108.68	122.17	122.17	4.53483	4.53483	1386	90	3.14176
162-982A-12H-4-W 100.5	108.71	122.2	122.2	4.53565	4.53565	1327	81	3.12287
162-982A-12H-4-W 101.5	108.72	122.21	122.21	4.53593	4.53593	1649	103	3.21722
162-982A-12H-4-W 103	108.73	122.22	122.22	4.53621	4.53621	1444	95	3.15957
162-982A-12H-4-W 104	108.74	122.23	122.23	4.53648	4.53648	1459	78	3.16406
162-982A-12H-4-W 105.5	108.76	122.25	122.25	4.53703	4.53703	1385	75	3.14145
162-982A-12H-4-W 108	108.78	122.27	122.27	4.53758	4.53758	1392	76	3.14364
162-982A-12H-4-W 110.5	108.81	122.3	122.3	4.53841	4.53841	1442	79	3.15897
162-982A-12H-4-W 111.5	108.82	122.31	122.31	4.53869	4.53869	1511	90	3.17926
162-982A-12H-4-W 113	108.83	122.32	122.32	4.53896	4.53896	1474	82	3.1685
162-982A-12H-4-W 119	108.89	122.38	122.38	4.54062	4.54062	1567	12	3.19507
162-982A-12H-4-W 120	108.9	122.39	122.39	4.54089	4.54089	1508	61	3.1784
162-982A-12H-4-W 121	108.91	122.4	122.4	4.54117	4.54117	1520	38	3.18184
162-982A-12H-4-W 122	108.92	122.41	122.41	4.54144	4.54144	1521	81	3.18213
162-982A-12H-4-W 124	108.94	122.43	122.43	4.54199	4.54199	1696	10	3.22943
162-982A-12H-4-W 125	108.95	122.44	122.44	4.54227	4.54227	1629	46	3.21192
162-982A-12H-4-W 128	108.98	122.47	122.47	4.5431	4.5431	1592	27	3.20194
162-982A-12H-4-W 131	109.01	122.5	122.5	4.54392	4.54392	1819	73	3.25983
162-982A-12H-4-W 132	109.02	122.51	122.51	4.5442	4.5442	1717	99	3.23477
162-982A-12H-4-W 133	109.03	122.52	122.52	4.54447	4.54447	1883	106	3.27485
162-982A-12H-4-W 136	109.06	122.55	122.55	4.5453	4.5453	1672	55	3.22324
162-982A-12H-4-W 140	109.1	122.59	122.59	4.5464	4.5464	2029	117	3.30728
162-982A-12H-4-W 142	109.12	122.61	122.61	4.54695	4.54695	2065	81	3.31492
162-982A-12H-4-W 143	109.13	122.62	122.62	4.54723	4.54723	2089	78	3.31994
162-982A-12H-5-W 2	109.22	122.71	122.71	4.54971	4.54971	1911	57	3.28126
162-982A-12H-5-W 3	109.23	122.72	122.72	4.54999	4.54999	1937	68	3.28713
162-982A-12H-5-W 6	109.26	122.75	122.75	4.55081	4.55081	1665	76	3.22141
162-982A-12H-5-W 9	109.29	122.78	122.78	4.55164	4.55164	1481	70	3.17056
162-982A-12H-5-W 10	109.3	122.79	122.79	4.55192	4.55192	1602	28	3.20466
162-982A-12H-5-W 11	109.31	122.8	122.8	4.55219	4.55219	1478	56	3.16967
162-982A-12H-5-W 13.5	109.34	122.83	122.83	4.55302	4.55302	1396	80	3.14489
162-982A-12H-5-W 16	109.36	122.85	122.85	4.55357	4.55357	1506	64	3.17782
162-982A-12H-5-W 18	109.38	122.87	122.87	4.55412	4.55412	1635	79	3.21352
162-982A-12H-5-W 20	109.4	122.89	122.89	4.55467	4.55467	1476	93	3.16909
162-982A-12H-5-W 22.5	109.43	122.92	122.92	4.5555	4.5555	1424	49	3.15351
162-982A-12H-5-W 24	109.44	122.93	122.93	4.55577	4.55577	1465	84	3.16584
162-982A-12H-5-W 26	109.46	122.95	122.95	4.55633	4.55633	1531	58	3.18498
162-982A-12H-5-W 27	109.47	122.96	122.96	4.5566	4.5566	1666	67	3.22167
162-982A-12H-5-W 29	109.49	122.98	122.98	4.55715	4.55715	1786	98	3.25188
162-982A-12H-5-W 32	109.52	123.01	123.01	4.55798	4.55798	1405	54	3.14768
162-982A-12H-5-W 34	109.54	123.03	123.03	4.55853	4.55853	1465	73	3.16584
162-982A-12H-5-W 35	109.55	123.04	123.04	4.55881	4.55881	1582	74	3.19921
162-982A-12H-5-W 39	109.59	123.08	123.08	4.55991	4.55991	1505	80	3.17754
162-982A-12H-5-W 40	109.6	123.09	123.09	4.56018	4.56018	1654	72	3.21854
162-982A-12H-5-W 41	109.61	123.1	123.1	4.56046	4.56046	1564	106	3.19424
162-982A-12H-5-W 42	109.62	123.11	123.11	4.56074	4.56074	1628	39	3.21165
162-982A-12H-5-W 43	109.63	123.12	123.12	4.56101	4.56101	1395	49	3.14457
162-982A-12H-5-W 45.5	109.66	123.15	123.15	4.56184	4.56184	1555	131	3.19173
162-982A-12H-5-W 48	109.68	123.17	123.17	4.56239	4.56239	1387	117	3.14208
162-982A-12H-5-W 50	109.7	123.19	123.19	4.56294	4.56294	1600	69	3.20412
162-982A-12H-5-W 53	109.73	123.22	123.22	4.56377	4.56377	1255	79	3.09864
162-982A-12H-5-W 54	109.74	123.23	123.23	4.56404	4.56404	1391	59	3.14333
162-982A-12H-5-W 55	109.75	123.24	123.24	4.56432	4.56432	1666	81	3.22167
162-982A-12H-5-W 58	109.78	123.27	123.27	4.56515	4.56515	1411	54	3.14953
162-982A-12H-5-W 59	109.79	123.28	123.28	4.56542	4.56542	1401	34	3.14644
162-982A-12H-5-W 62	109.82	123.31	123.31	4.56625	4.56625	1628	84	3.21165
162-982A-12H-5-W 65	109.85	123.34	123.34	4.56708	4.56708	1209	38	3.08243
162-982A-12H-5-W 66	109.86	123.35	123.35	4.56735	4.56735	1550	30	3.19033
162-982A-12H-5-W 67	109.87	123.36	123.36	4.56763	4.56763	1191	100	3.07591
162-982A-12H-5-W 70	109.9	123.39	123.39	4.56845	4.56845	1217	62	3.08529
162-982A-12H-5-W 71	109.91	123.4	123.4	4.56873	4.56873	1174	42	3.06967
162-982A-12H-5-W 73	109.93	123.42	123.42	4.56928	4.56928	960	33	2.98227
162-982A-12H-5-W 76	109.96	123.45	123.45	4.57011	4.57011	970	45	2.98677
162-982A-12H-5-W 77	109.97	123.46	123.46	4.57038	4.57038	924	64	2.96567
162-982A-12H-5-W 79	109.99	123.48	123.48	4.57093	4.57093	1282	69	3.10789
162-982A-12H-5-W 82	110.02	123.51	123.51	4.57176	4.57176	1315	73	3.11893
162-982A-12H-5-W 83	110.03	123.52	123.52	4.57204	4.57204	1391	66	3.14333
162-982A-12H-5-W 85.5	110.06	123.55	123.55	4.57286	4.57286	1232	81	3.09061
162-982A-12H-5-W 89	110.09	123.58	123.58	4.57369	4.57369	1326	72	3.12254
162-982A-12H-5-W 90	110.1	123.59	123.59	4.57397	4.57397	1570	24	3.1959
162-982A-12H-5-W 92	110.12	123.61	123.61	4.57452	4.57452	1700	88	3.23045
162-982A-12H-5-W 94.5	110.15	123.64	123.64	4.57534	4.57534	1668	60	3.2222
162-982A-12H-5-W 97	110.17	123.66	123.66	4.5759	4.5759	1786	74	3.25188
162-982A-12H-5-W 98	110.18	123.67	123.67	4.57617	4.57617	1545	97	3.18893
162-982A-12H-5-W 100	110.2	123.69	123.69	4.57672	4.57672	1782	92	3.25091
162-982A-12H-5-W 101	110.21	123.7	123.7	4.577	4.577	1764	64	3.2465
162-982A-12H-5-W 106	110.26	123.75	123.75	4.57838	4.57838	1851	55	3.26741
162-982A-12H-5-W 108	110.28	123.77	123.77	4.57893	4.57893	2036	58	3.30878
162-982A-12H-5-W 109	110.29	123.78	123.78	4.5792	4.5792	1987	71	3.2982
162-982A-12H-5-W 112	110.32	123.81	123.81	4.58003	4.58003	2097	57	3.3216
162-982A-12H-5-W 113	110.33	123.82	123.82	4.58031	4.58031	2060	55	3.31387
162-982A-12H-5-W 116	110.36	123.85	123.85	4.58113	4.58113	2257	16	3.35353
162-982A-12H-5-W 118	110.38	123.87	123.87	4.58168	4.58168	2239	64	3.35005
162-982A-12H-5-W 119	110.39	123.88	123.88	4.58196	4.58196	2285	71	3.35889
162-982A-12H-5-W 123	110.43	123.92	123.92	4.58306	4.58306	2353	60	3.37162
162-982A-12H-5-W 124	110.44	123.93	123.93	4.58334	4.58334	2502	99	3.39829
162-982B-13H-2-W 92	112.42	123.96	123.96	4.58416	4.58416	1740	92	3.24055
162-982B-13H-2-W 93	112.43	123.97	123.97	4.58444	4.58444	1546	102	3.18921
162-982B-13H-2-W 96	112.46	124	124	4.58527	4.58527	1636	57	3.21378
162-982B-13H-2-W 98	112.48	124.02	124.02	4.58582	4.58582	1668	106	3.2222
162-982B-13H-2-W 99	112.49	124.03	124.03	4.58609	4.58609	1803	102	3.256
162-982B-13H-2-W 102	112.52	124.06	124.06	4.58692	4.58692	1919	54	3.28307
162-982B-13H-2-W 103	112.53	124.07	124.07	4.5872	4.5872	2007	60	3.30255
162-982B-13H-2-W 106	112.56	124.1	124.1	4.58802	4.58802	1657	62	3.21932
162-982B-13H-2-W 108	112.58	124.12	124.12	4.58857	4.58857	1616	81	3.20844
162-982B-13H-2-W 109	112.59	124.13	124.13	4.58885	4.58885	1693	106	3.22866
162-982B-13H-2-W 115	112.65	124.19	124.19	4.5905	4.5905	1551	46	3.19061
162-982B-13H-2-W 116	112.66	124.2	124.2	4.59078	4.59078	1656	40	3.21906
162-982B-13H-2-W 118	112.68	124.22	124.22	4.59133	4.59133	1852	52	3.26764
162-982B-13H-2-W 120	112.7	124.24	124.24	4.59188	4.59188	1651	90	3.21775
162-982B-13H-2-W 122	112.72	124.26	124.26	4.59243	4.59243	1573	36	3.19673
162-982B-13H-2-W 125	112.75	124.29	124.29	4.59326	4.59326	1929	74	3.28533
162-982B-13H-2-W 127	112.77	124.31	124.31	4.59381	4.59381	1744	97	3.24155
162-982B-13H-2-W 128	112.78	124.32	124.32	4.59409	4.59409	1638	67	3.21431
162-982B-13H-2-W 130	112.8	124.34	124.34	4.59464	4.59464	1587	67	3.20058
162-982B-13H-2-W 131	112.81	124.35	124.35	4.59491	4.59491	1624	72	3.21059
162-982B-13H-2-W 132	112.82	124.36	124.36	4.59519	4.59519	1498	106	3.17551
162-982B-13H-2-W 133	112.83	124.37	124.37	4.59547	4.59547	1624	76	3.21059
162-982B-13H-2-W 136	112.86	124.4	124.4	4.59629	4.59629	1552	67	3.19089
162-982B-13H-2-W 138	112.88	124.42	124.42	4.59684	4.59684	1607	38	3.20602
162-982B-13H-2-W 139	112.89	124.43	124.43	4.59712	4.59712	1569	69	3.19562
162-982B-13H-2-W 142	112.92	124.46	124.46	4.59795	4.59795	1735	67	3.2393
162-982B-13H-2-W 144	112.94	124.48	124.48	4.5985	4.5985	1605	45	3.20548
162-982B-13H-2-W 147	112.97	124.51	124.51	4.59932	4.59932	1750	60	3.24304
162-982B-13H-2-W 148	112.98	124.52	124.52	4.5996	4.5996	1586	66	3.2003
162-982B-13H-3-W 4	113.04	124.58	124.58	4.60125	4.60125	1853	34	3.26788
162-982B-13H-3-W 6	113.06	124.6	124.6	4.60181	4.60181	1936	105	3.28691
162-982B-13H-3-W 8	113.08	124.62	124.62	4.60236	4.60236	1588	106	3.20085
162-982B-13H-3-W 10	113.1	124.64	124.64	4.60291	4.60291	1642	109	3.21537
162-982B-13H-3-W 13	113.13	124.67	124.67	4.60373	4.60373	1762	103	3.24601
162-982B-13H-3-W 14	113.14	124.68	124.68	4.60401	4.60401	1702	50	3.23096
162-982B-13H-3-W 16	113.16	124.7	124.7	4.60456	4.60456	1523	106	3.1827
162-982B-13H-3-W 18	113.18	124.72	124.72	4.60511	4.60511	1606	53	3.20575
162-982B-13H-3-W 20	113.2	124.74	124.74	4.60566	4.60566	1499	38	3.1758
162-982B-13H-3-W 22	113.22	124.76	124.76	4.60621	4.60621	1503	35	3.17696
162-982B-13H-3-W 25	113.25	124.79	124.79	4.60704	4.60704	1370	89	3.13672
162-982B-13H-3-W 26	113.26	124.8	124.8	4.60732	4.60732	1535	82	3.18611
162-982B-13H-3-W 28	113.28	124.82	124.82	4.60787	4.60787	1545	78	3.18893
162-982B-13H-3-W 29	113.29	124.83	124.83	4.60814	4.60814	1593	66	3.20222
162-982B-13H-3-W 32	113.32	124.86	124.86	4.60897	4.60897	1700	72	3.23045
162-982B-13H-3-W 33	113.33	124.87	124.87	4.60925	4.60925	1439	100	3.15806
162-982B-13H-3-W 36	113.36	124.9	124.9	4.61007	4.61007	1736	135	3.23955
162-982B-13H-3-W 37	113.37	124.91	124.91	4.61035	4.61035	1622	98	3.21005
162-982B-13H-3-W 38.5	113.39	124.93	124.93	4.6109	4.6109	1750	-17	3.24304
162-982B-13H-3-W 43	113.43	124.97	124.97	4.612	4.612	1547	81	3.18949
162-982B-13H-3-W 44	113.44	124.98	124.98	4.61228	4.61228	1748	62	3.24254
162-982B-13H-3-W 46	113.46	125	125	4.61283	4.61283	1722	104	3.23603
162-982B-13H-3-W 48	113.48	125.02	125.02	4.61338	4.61338	2029	94	3.30728
162-982B-13H-3-W 50	113.5	125.04	125.04	4.61393	4.61393	2145	102	3.33143
162-982B-13H-3-W 53	113.53	125.07	125.07	4.61476	4.61476	1745	83	3.2418
162-982B-13H-3-W 57	113.57	125.11	125.11	4.61586	4.61586	2078	33	3.31765
162-982B-13H-3-W 58	113.58	125.12	125.12	4.61614	4.61614	2250	64	3.35218
162-982B-13H-3-W 60	113.6	125.14	125.14	4.61669	4.61669	2137	99	3.3298
162-982B-13H-3-W 62	113.62	125.16	125.16	4.61724	4.61724	2213	52	3.34498
162-982B-13H-3-W 64	113.64	125.18	125.18	4.61779	4.61779	2187	51	3.33985
162-982B-13H-3-W 66.5	113.67	125.21	125.21	4.61862	4.61862	2527	76	3.40261
162-982B-13H-3-W 70	113.7	125.24	125.24	4.61945	4.61945	2370	54	3.37475
162-982B-13H-3-W 71	113.71	125.25	125.25	4.61972	4.61972	2650	71	3.42325
162-982B-13H-3-W 75	113.75	125.29	125.29	4.62082	4.62082	1938	89	3.28735
162-982B-13H-3-W 78	113.78	125.32	125.32	4.62165	4.62165	2669	66	3.42635
162-982B-13H-3-W 83.5	113.84	125.38	125.38	4.6233	4.6233	2508	48	3.39933
162-982B-13H-3-W 86	113.86	125.4	125.4	4.62386	4.62386	2407	99	3.38148
162-982B-13H-3-W 88	113.88	125.42	125.42	4.62441	4.62441	2207	73	3.3438
162-982B-13H-3-W 90	113.9	125.44	125.44	4.62496	4.62496	2274	86	3.35679
162-982B-13H-3-W 91	113.91	125.45	125.45	4.62523	4.62523	2344	119	3.36996
162-982B-13H-3-W 94	113.94	125.48	125.48	4.62606	4.62606	2023	79	3.306
162-982B-13H-3-W 96	113.96	125.5	125.5	4.62661	4.62661	2012	82	3.30363
162-982B-13H-3-W 99	113.99	125.53	125.53	4.62744	4.62744	1957	109	3.29159
162-982B-13H-3-W 100	114	125.54	125.54	4.62771	4.62771	2129	71	3.32818
162-982B-13H-3-W 102	114.02	125.56	125.56	4.62827	4.62827	1932	100	3.28601
162-982B-13H-3-W 103	114.03	125.57	125.57	4.62854	4.62854	1920	52	3.2833
162-982B-13H-3-W 104	114.04	125.58	125.58	4.62882	4.62882	1863	104	3.27021
162-982B-13H-3-W 106	114.06	125.6	125.6	4.62937	4.62937	2058	87	3.31345
162-982B-13H-3-W 107	114.07	125.61	125.61	4.62964	4.62964	1970	27	3.29447
162-982B-13H-3-W 110	114.1	125.64	125.64	4.63047	4.63047	1999	84	3.30081
162-982B-13H-3-W 111	114.11	125.65	125.65	4.63075	4.63075	2015	63	3.30428
162-982B-13H-3-W 114	114.14	125.68	125.68	4.63157	4.63157	2036	45	3.30878
162-982B-13H-3-W 116	114.16	125.7	125.7	4.63212	4.63212	1974	80	3.29535
162-982B-13H-3-W 117	114.17	125.71	125.71	4.6324	4.6324	1764	93	3.2465
162-982B-13H-3-W 118	114.18	125.72	125.72	4.63268	4.63268	1640	81	3.21484
162-982B-13H-3-W 119	114.19	125.73	125.73	4.63295	4.63295	1798	95	3.25479
162-982B-13H-3-W 123.5	114.24	125.78	125.78	4.63433	4.63433	1776	32	3.24944
162-982B-13H-3-W 125.5	114.26	125.8	125.8	4.63488	4.63488	1738	73	3.24005
162-982B-13H-3-W 127.5	114.28	125.82	125.82	4.63543	4.63543	1684	64	3.22634
162-982B-13H-3-W 130	114.3	125.84	125.84	4.63598	4.63598	1683	74	3.22608
162-982B-13H-3-W 132	114.32	125.86	125.86	4.63653	4.63653	1645	15	3.21617
162-982B-13H-3-W 135	114.35	125.89	125.89	4.63736	4.63736	1359	99	3.13322
162-982B-13H-3-W 136	114.36	125.9	125.9	4.63764	4.63764	1480	105	3.17026
162-982B-13H-3-W 138	114.38	125.92	125.92	4.63819	4.63819	1417	63	3.15137
162-982B-13H-3-W 140	114.4	125.94	125.94	4.63874	4.63874	1350	-1	3.13033
162-982B-13H-3-W 141	114.41	125.95	125.95	4.63902	4.63902	1458	55	3.16376
162-982B-13H-3-W 142	114.42	125.96	125.96	4.63929	4.63929	1476	130	3.16909
162-982B-13H-3-W 143	114.43	125.97	125.97	4.63957	4.63957	1236	56	3.09202
162-982B-13H-3-W 146	114.46	126	126	4.64039	4.64039	2036	41	3.30878
162-982B-13H-4-W 1	114.51	126.05	126.05	4.64177	4.64177	1580		3.19866
162-982B-13H-4-W 2	114.52	126.06	126.06	4.64205	4.64205	1652		3.21801
162-982B-13H-4-W 4	114.54	126.08	126.08	4.6426	4.6426	1585		3.20003
162-982B-13H-4-W 6	114.56	126.1	126.1	4.64315	4.64315	1560		3.19312
162-982B-13H-4-W 7	114.57	126.11	126.11	4.64343	4.64343	1390		3.14301
162-982B-13H-4-W 9	114.59	126.13	126.13	4.64398	4.64398	1436		3.15715
162-982B-13H-4-W 14	114.64	126.18	126.18	4.64535	4.64535	1520		3.18184
162-982B-13H-4-W 15	114.65	126.19	126.19	4.64563	4.64563	1403		3.14706
162-982B-13H-4-W 18	114.68	126.22	126.22	4.64646	4.64646	1367		3.13577
162-982B-13H-4-W 20	114.7	126.24	126.24	4.64701	4.64701	1301		3.11428
162-982B-13H-4-W 22	114.72	126.26	126.26	4.64756	4.64756	1289		3.11025
162-982B-13H-4-W 23	114.73	126.27	126.27	4.64784	4.64784	1497		3.17522
162-982B-13H-4-W 26	114.76	126.3	126.3	4.64866	4.64866	1540		3.18752
162-982B-13H-4-W 28	114.78	126.32	126.32	4.64921	4.64921	1473		3.1682
162-982B-13H-4-W 30	114.8	126.34	126.34	4.64976	4.64976	1362		3.13418
162-982B-13H-4-W 31	114.81	126.35	126.35	4.65004	4.65004	1492		3.17377
162-982B-13H-4-W 34	114.84	126.38	126.38	4.65087	4.65087	1536		3.18639
162-982B-13H-4-W 35.5	114.86	126.4	126.4	4.65142	4.65142	1546		3.18921
162-982B-13H-4-W 38	114.88	126.42	126.42	4.65197	4.65197	1712		3.2335
162-982B-13H-4-W 40	114.9	126.44	126.44	4.65252	4.65252	1719		3.23528
162-982B-13H-4-W 42	114.92	126.46	126.46	4.65307	4.65307	1942		3.28825
162-982B-13H-4-W 44	114.94	126.48	126.48	4.65362	4.65362	1586		3.2003
162-982B-13H-4-W 46	114.96	126.5	126.5	4.65417	4.65417	1618		3.20898
162-982B-13H-4-W 53	115.03	126.57	126.57	4.6561	4.6561	2018		3.30492
162-982B-13H-4-W 55	115.05	126.59	126.59	4.65666	4.65666	2236		3.34947
162-982B-13H-4-W 58	115.08	126.62	126.62	4.65748	4.65748	2051		3.31197
162-982B-13H-4-W 59	115.09	126.63	126.63	4.65776	4.65776	2129		3.32818
162-982B-13H-4-W 62	115.12	126.66	126.66	4.65859	4.65859	2608		3.41631
162-982B-13H-4-W 63	115.13	126.67	126.67	4.65886	4.65886	2334		3.3681
162-982B-13H-4-W 66	115.16	126.7	126.7	4.65969	4.65969	2502		3.39829
162-982B-13H-4-W 67	115.17	126.71	126.71	4.65996	4.65996	2781		3.4442
162-982B-13H-4-W 69.5	115.2	126.74	126.74	4.66079	4.66079	2843		3.45378
162-982B-13H-4-W 71.5	115.22	126.76	126.76	4.66134	4.66134	2602		3.41531
162-982B-13H-4-W 74	115.24	126.78	126.78	4.66189	4.66189	2992		3.47596
162-982B-13H-4-W 75	115.25	126.79	126.79	4.66217	4.66217	2837		3.45286
162-982B-13H-4-W 77.5	115.28	126.82	126.82	4.66299	4.66299	2802		3.44747
162-982B-13H-4-W 80	115.3	126.84	126.84	4.66355	4.66355	2879		3.45924
162-982B-13H-4-W 82	115.32	126.86	126.86	4.6641	4.6641	2400		3.38021
162-982B-13H-4-W 83	115.33	126.87	126.87	4.66437	4.66437	2851		3.455
162-982B-13H-4-W 84	115.34	126.88	126.88	4.66465	4.66465	2667		3.42602
162-982B-13H-4-W 86	115.36	126.9	126.9	4.6652	4.6652	2741		3.43791
162-982B-13H-4-W 88	115.38	126.92	126.92	4.66575	4.66575	2690		3.42975
162-982B-13H-4-W 89	115.39	126.93	126.93	4.66603	4.66603	2620		3.4183
162-982B-13H-4-W 93	115.43	126.97	126.97	4.66713	4.66713	2191		3.34064
162-982B-13H-4-W 94	115.44	126.98	126.98	4.66741	4.66741	2545		3.40569
162-982B-13H-4-W 98	115.48	127.02	127.02	4.66851	4.66851	3536		3.54851
162-982B-13H-4-W 102	115.52	127.06	127.06	4.66961	4.66961	4290		3.63246
162-982B-13H-4-W 103	115.53	127.07	127.07	4.66989	4.66989	4867		3.68726
162-982B-13H-4-W 105.5	115.56	127.1	127.1	4.67071	4.67071	3219		3.50772
162-982B-13H-4-W 108	115.58	127.12	127.12	4.67126	4.67126	2312		3.36399
162-982B-13H-4-W 110.5	115.61	127.15	127.15	4.67209	4.67209	2205		3.34341
162-982B-13H-4-W 111.5	115.62	127.16	127.16	4.67237	4.67237	2782		3.44436
162-982B-13H-4-W 114	115.64	127.18	127.18	4.67292	4.67292	2122		3.32675
162-982B-13H-4-W 116	115.66	127.2	127.2	4.67347	4.67347	1865		3.27068
162-982B-13H-4-W 119	115.69	127.23	127.23	4.6743	4.6743	1858		3.26905
162-982B-13H-4-W 120	115.7	127.24	127.24	4.67457	4.67457	2007		3.30255
162-982B-13H-4-W 121	115.71	127.25	127.25	4.67485	4.67485	1946		3.28914
162-982B-13H-4-W 123	115.73	127.27	127.27	4.6754	4.6754	1776		3.24944
162-982B-13H-4-W 125	115.75	127.29	127.29	4.67595	4.67595	1802		3.25575
162-982B-13H-4-W 126	115.76	127.3	127.3	4.67623	4.67623	1985		3.29776
162-982B-13H-4-W 128	115.78	127.32	127.32	4.67678	4.67678	1641		3.21511
162-982B-13H-4-W 129	115.79	127.33	127.33	4.67705	4.67705	1691		3.22814
162-982B-13H-4-W 135	115.85	127.39	127.39	4.67871	4.67871	1673		3.2235
162-982B-13H-4-W 137	115.87	127.41	127.41	4.67926	4.67926	1875		3.273
162-982B-13H-4-W 138	115.88	127.42	127.42	4.67953	4.67953	1606		3.20575
162-982B-13H-4-W 141	115.91	127.45	127.45	4.68036	4.68036	1740		3.24055
162-982B-13H-4-W 142	115.92	127.46	127.46	4.68064	4.68064	1631		3.21245
162-982B-13H-4-W 145	115.95	127.49	127.49	4.68146	4.68146	1485		3.17173
162-982B-13H-4-W 146	115.96	127.5	127.5	4.68174	4.68174	1719		3.23528
162-982B-13H-5-W 2	116.02	127.56	127.56	4.68339	4.68339	1905	100	3.2799
162-982B-13H-5-W 6	116.06	127.6	127.6	4.68449	4.68449	1622	23	3.21005
162-982B-13H-5-W 9	116.09	127.63	127.63	4.68532	4.68532	1811	30	3.25792
162-982B-13H-5-W 10	116.1	127.64	127.64	4.6856	4.6856	1659	22	3.21985
162-982B-13H-5-W 11	116.11	127.65	127.65	4.68587	4.68587	1744	100	3.24155
162-982B-13H-5-W 16	116.16	127.7	127.7	4.68725	4.68725	1473	52	3.1682
162-982B-13H-5-W 18	116.18	127.72	127.72	4.6878	4.6878	1401	39	3.14644
162-982B-13H-5-W 19	116.19	127.73	127.73	4.68808	4.68808	1643	120	3.21564
162-982B-13H-5-W 26	116.26	127.8	127.8	4.69001	4.69001	1462	55	3.16495
162-982B-13H-5-W 31	116.31	127.85	127.85	4.69138	4.69138	1912	58	3.28149
162-982B-13H-5-W 32	116.32	127.86	127.86	4.69166	4.69166	1723	68	3.23629
162-982B-13H-5-W 37	116.37	127.91	127.91	4.69304	4.69304	1611	58	3.2071
162-982B-13H-5-W 39	116.39	127.93	127.93	4.69359	4.69359	1547	52	3.18949
162-982B-13H-5-W 42	116.42	127.96	127.96	4.69442	4.69442	1514	96	3.18013
162-982B-13H-5-W 44	116.44	127.98	127.98	4.69497	4.69497	1509	67	3.17869
162-982B-13H-5-W 47	116.47	128.01	128.01	4.69579	4.69579	1762	79	3.24601
162-982B-13H-5-W 48	116.48	128.02	128.02	4.69607	4.69607	1810	72	3.25768
162-982B-13H-5-W 51	116.51	128.05	128.05	4.6969	4.6969	1979	77	3.29645
162-982B-13H-5-W 52	116.52	128.06	128.06	4.69717	4.69717	1870	36	3.27184
162-982B-13H-5-W 54	116.54	128.08	128.08	4.69772	4.69772	1736	107	3.23955
162-982B-13H-5-W 56	116.56	128.1	128.1	4.69817	4.69819	1774	98	3.24895
162-982B-13H-5-W 57	116.57	128.11	128.11	4.69834	4.69837	1831	58	3.26269
162-982B-13H-5-W 64	116.64	128.18	128.18	4.69953	4.69968	1815	86	3.25888
162-982B-13H-5-W 65	116.65	128.19	128.19	4.6997	4.69986	1707	65	3.23223
162-982B-13H-5-W 68	116.68	128.22	128.22	4.70021	4.70042	1730	85	3.23805
162-982B-13H-5-W 69	116.69	128.23	128.23	4.70038	4.70061	1767	103	3.24724
162-982B-13H-5-W 73	116.73	128.27	128.27	4.70106	4.70135	1754	103	3.24403
162-982B-13H-5-W 74	116.74	128.28	128.28	4.70123	4.70154	1861	67	3.26975
162-982B-13H-5-W 76	116.76	128.3	128.3	4.70157	4.70191	1714	68	3.23401
162-982B-13H-5-W 81	116.81	128.35	128.35	4.70242	4.70284	1765	74	3.24674
162-982B-13H-5-W 82	116.82	128.36	128.36	4.70259	4.70303	1796	117	3.25431
162-982B-13H-5-W 83	116.83	128.37	128.37	4.70276	4.70321	1742	44	3.24105
162-982B-13H-5-W 86	116.86	128.4	128.4	4.70327	4.70377	1775	47	3.2492
162-982B-13H-5-W 89	116.89	128.43	128.43	4.70378	4.70433	1733	7	3.2388
162-982B-13H-5-W 90	116.9	128.44	128.44	4.70395	4.70452	1651	150	3.21775
162-982B-13H-5-W 93	116.93	128.47	128.47	4.70446	4.70508	1192	80	3.07628
162-982B-13H-5-W 97	116.97	128.51	128.51	4.70514	4.70582	1398	102	3.14551
162-982B-13H-5-W 98	116.98	128.52	128.52	4.70531	4.70601	1463	92	3.16524
162-982B-13H-5-W 104	117.04	128.58	128.58	4.70633	4.70712	1339	47	3.12678
162-982B-13H-5-W 105	117.05	128.59	128.59	4.7065	4.70731	1312	58	3.11793
162-982B-13H-5-W 108	117.08	128.62	128.62	4.70701	4.70787	1415	95	3.15076
162-982B-13H-5-W 109	117.09	128.63	128.63	4.70718	4.70805	1225	69	3.08814
162-982B-13H-5-W 112	117.12	128.66	128.66	4.70769	4.70861	1554	67	3.19145
162-982B-13H-5-W 113	117.13	128.67	128.67	4.70786	4.7088	1574	81	3.197
162-982B-13H-5-W 117	117.17	128.71	128.71	4.70855	4.70954	1680	63	3.22531
162-982B-13H-5-W 118	117.18	128.72	128.72	4.70871	4.70973	1649	63	3.21722
162-982B-13H-5-W 121	117.21	128.75	128.75	4.70923	4.71029	1615	38	3.20817
162-982B-13H-5-W 122	117.22	128.76	128.76	4.7094	4.71047	1631	71	3.21245
162-982B-13H-5-W 125	117.25	128.79	128.79	4.70991	4.71103	1733	107	3.2388
162-982B-13H-5-W 126	117.26	128.8	128.8	4.71008	4.71122	1584	59	3.19976
162-982B-13H-5-W 128.5	117.29	128.83	128.83	4.71059	4.71178	1673	56	3.2235
162-982B-13H-5-W 129.5	117.3	128.84	128.84	4.71076	4.71196	1462	101	3.16495
162-982B-13H-5-W 132.5	117.33	128.87	128.87	4.71127	4.71252	1603	108	3.20493
162-982B-13H-5-W 133.39999	117.33	128.87	128.87	4.71127	4.71252	1248	139	3.09621
162-982B-13H-5-W 136	117.36	128.9	128.9	4.71178	4.71308	1540	40	3.18752
162-982B-13H-5-W 137	117.37	128.91	128.91	4.71195	4.71327	1552	69	3.19089
162-982B-13H-5-W 143.5	117.44	128.98	128.98	4.71314	4.71457	1472	61	3.16791
162-982B-13H-5-W 146	117.46	129	129	4.71348	4.71494	1465	111	3.16584
162-982B-13H-5-W 148	117.48	129.02	129.02	4.71382	4.71532	1568	78	3.19535
162-982B-13H-6-W 2	117.52	129.06	129.06	4.7145	4.71606	1669	62	3.22246
162-982B-13H-6-W 3	117.53	129.07	129.07	4.71467	4.71625	1621	99	3.20978
162-982B-13H-6-W 5.5	117.56	129.1	129.1	4.71518	4.71681	1522	42	3.18241
162-982B-13H-6-W 8	117.58	129.12	129.12	4.71552	4.71718	1568	73	3.19535
162-982B-13H-6-W 11	117.61	129.15	129.15	4.71603	4.71774	1494	25	3.17435
162-982B-13H-6-W 12	117.62	129.16	129.16	4.7162	4.71792	1509	59	3.17869
162-982B-13H-6-W 13	117.63	129.17	129.17	4.71637	4.71811	1682	72	3.22583
162-982B-13H-6-W 16	117.66	129.2	129.2	4.71688	4.71867	1285	20	3.1089
162-982B-13H-6-W 19	117.69	129.23	129.23	4.71739	4.71923	1584	100	3.19976
162-982B-13H-6-W 20	117.7	129.24	129.24	4.71756	4.71941	1514	49	3.18013
162-982B-13H-6-W 24	117.74	129.28	129.28	4.71824	4.72016	1434	58	3.15655
162-982B-13H-6-W 27	117.77	129.31	129.31	4.71875	4.72072	1585	81	3.20003
162-982B-13H-6-W 28	117.78	129.32	129.32	4.71892	4.7209	1876	50	3.27323
162-982B-13H-6-W 29	117.79	129.33	129.33	4.71909	4.72109	1746	55	3.24204
162-982B-13H-6-W 34	117.84	129.38	129.38	4.71994	4.72202	1799	82	3.25503
162-982B-13H-6-W 37	117.87	129.41	129.41	4.72045	4.72258	1773	48	3.24871
162-982B-13H-6-W 38	117.88	129.42	129.42	4.72062	4.72276	1799	59	3.25503
162-982B-13H-6-W 41	117.91	129.45	129.45	4.72113	4.72332	1762	96	3.24601
162-982B-13H-6-W 43	117.93	129.47	129.47	4.72147	4.72369	1812	80	3.25816
162-982B-13H-6-W 44	117.94	129.48	129.48	4.72164	4.72388	1820	73	3.26007
162-982B-13H-6-W 46	117.96	129.5	129.5	4.72198	4.72425	1956	121	3.29137
162-982B-13H-6-W 51	118.01	129.55	129.55	4.72283	4.72518	2057	54	3.31323
162-982B-13H-6-W 52	118.02	129.56	129.56	4.723	4.72537	2315	83	3.36455
162-982B-13H-6-W 53	118.03	129.57	129.57	4.72317	4.72556	2337	126	3.36866
162-982B-13H-6-W 56	118.06	129.6	129.6	4.72368	4.72612	2247	117	3.3516
162-982B-13H-6-W 57	118.07	129.61	129.61	4.72385	4.7263	2407	81	3.38148
162-982B-13H-6-W 61	118.11	129.65	129.65	4.72453	4.72705	2338	84	3.36884
162-982B-13H-6-W 62	118.12	129.66	129.66	4.7247	4.72723	2369	43	3.37457
162-982B-13H-6-W 67	118.17	129.71	129.71	4.72555	4.72816	2425	27	3.38471
162-982B-13H-6-W 68	118.18	129.72	129.72	4.72572	4.72835	2544	63	3.40552
162-982B-13H-6-W 73.5	118.24	129.78	129.78	4.72674	4.72947	2663	82	3.42537
162-982A-13H-2-W 78	114.98	129.9	129.8	4.72708	4.72984	2776	107	3.44342
162-982A-13H-2-W 80	115	129.92	129.82	4.72742	4.73021	2975	53	3.47349
162-982A-13H-2-W 82	115.02	129.94	129.84	4.72776	4.73058	2684	80	3.42878
162-982A-13H-2-W 83	115.03	129.95	129.85	4.72793	4.73077	2718	100	3.43425
162-982A-13H-2-W 84	115.04	129.96	129.86	4.7281	4.73096	2735	93	3.43696
162-982A-13H-2-W 88	115.08	130	129.9	4.72878	4.7317	2070	114	3.31597
162-982A-13H-2-W 91	115.11	130.03	129.93	4.72929	4.73226	2109	59	3.32408
162-982A-13H-2-W 92	115.12	130.04	129.94	4.72946	4.73245	2168	73	3.33606
162-982A-13H-2-W 94	115.14	130.06	129.96	4.7298	4.73282	2305	86	3.36267
162-982A-13H-2-W 98	115.18	130.1	130	4.73048	4.73356	1860	69	3.26951
162-982A-13H-2-W 100	115.2	130.12	130.02	4.73083	4.73394	2044	67	3.31048
162-982A-13H-2-W 102	115.22	130.14	130.04	4.73117	4.73431	1804	56	3.25624
162-982A-13H-2-W 104	115.24	130.16	130.06	4.73151	4.73468	1774	47	3.24895
162-982A-13H-2-W 107	115.27	130.19	130.09	4.73202	4.73524	2004	113	3.3019
162-982A-13H-2-W 109	115.29	130.21	130.11	4.73236	4.73561	1870	135	3.27184
162-982A-13H-2-W 110	115.3	130.22	130.12	4.73253	4.7358	1694	94	3.22891
162-982A-13H-2-W 112	115.32	130.24	130.14	4.73287	4.73617	1791	63	3.2531
162-982A-13H-2-W 114	115.34	130.26	130.16	4.73321	4.73654	1468	34	3.16673
162-982A-13H-2-W 120	115.4	130.32	130.22	4.73423	4.73766	1625	57	3.21085
162-982A-13H-2-W 122	115.42	130.34	130.24	4.73457	4.73803	1709	47	3.23274
162-982A-13H-2-W 124	115.44	130.36	130.26	4.73491	4.7384	1797	10	3.25455
162-982A-13H-2-W 126	115.46	130.38	130.28	4.73525	4.73878	1716	51	3.23452
162-982A-13H-2-W 129	115.49	130.41	130.31	4.73576	4.73933	1906	76	3.28012
162-982A-13H-2-W 130	115.5	130.42	130.32	4.73593	4.73952	1554	78	3.19145
162-982A-13H-2-W 132	115.52	130.44	130.34	4.73627	4.73989	1586	17	3.2003
162-982A-13H-2-W 133	115.53	130.45	130.35	4.73644	4.74008	1827	100	3.26174
162-982A-13H-2-W 136	115.56	130.48	130.38	4.73695	4.74064	1684	15	3.22634
162-982A-13H-2-W 138	115.58	130.5	130.4	4.73729	4.74101	1573	81	3.19673
162-982A-13H-2-W 140	115.6	130.52	130.42	4.73763	4.74138	1600	41	3.20412
162-982A-13H-2-W 142	115.62	130.54	130.44	4.73797	4.74176	1370	-3	3.13672
162-982A-13H-2-W 144	115.64	130.56	130.46	4.73831	4.74213	1679	48	3.22505
162-982A-13H-2-W 146	115.66	130.58	130.48	4.73865	4.7425	1747	75	3.24229
162-982A-13H-2-W 148	115.68	130.6	130.5	4.73899	4.74287	1400	69	3.14613
162-982A-13H-3-W 4	115.74	130.66	130.56	4.74001	4.74399	1989	3	3.29863
162-982A-13H-3-W 5	115.75	130.67	130.57	4.74018	4.74418	1617	78	3.20871
162-982A-13H-3-W 7.5	115.78	130.7	130.6	4.74069	4.74473	1261	30	3.10072
162-982A-13H-3-W 10	115.8	130.72	130.62	4.74103	4.74511	1571	78	3.19618
162-982A-13H-3-W 13	115.83	130.75	130.65	4.74154	4.74567	1422	63	3.1529
162-982A-13H-3-W 14	115.84	130.76	130.66	4.74171	4.74585	1545	63	3.18893
162-982A-13H-3-W 16.5	115.87	130.79	130.69	4.74222	4.74641	1561	-9	3.1934
162-982A-13H-3-W 19	115.89	130.81	130.71	4.74256	4.74678	1656	48	3.21906
162-982A-13H-3-W 20	115.9	130.82	130.72	4.74273	4.74697	1487	74	3.17231
162-982A-13H-3-W 23	115.93	130.85	130.75	4.74324	4.74753	1513	101	3.17984
162-982A-13H-3-W 24	115.94	130.86	130.76	4.74341	4.74771	1493	46	3.17406
162-982A-13H-3-W 27	115.97	130.89	130.79	4.74392	4.74827	1542	93	3.18808
162-982A-13H-3-W 28	115.98	130.9	130.8	4.74409	4.74846	1371	105	3.13704
162-982A-13H-3-W 31	116.01	130.93	130.83	4.7446	4.74902	1327	82	3.12287
162-982A-13H-3-W 32	116.02	130.94	130.84	4.74477	4.7492	1516	79	3.1807
162-982A-13H-3-W 34	116.04	130.96	130.86	4.74511	4.74958	1387	55	3.14208
162-982A-13H-3-W 36.5	116.07	130.99	130.89	4.74562	4.75013	1309	73	3.11694
162-982A-13H-3-W 38.5	116.09	131.01	130.91	4.74596	4.75051	1555	79	3.19173
162-982A-13H-3-W 41	116.11	131.03	130.93	4.7463	4.75088	1156	64	3.06296
162-982A-13H-3-W 42	116.12	131.04	130.94	4.74647	4.75106	1504	100	3.17725
162-982A-13H-3-W 44	116.14	131.06	130.96	4.74681	4.75144	1812	7	3.25816
162-982A-13H-3-W 46.5	116.17	131.09	130.99	4.74732	4.752	1590	81	3.2014
162-982A-13H-3-W 48.5	116.19	131.11	131.01	4.74766	4.75237	1371	79	3.13704
162-982A-13H-3-W 51	116.21	131.13	131.03	4.748	4.75274	1639	62	3.21458
162-982A-13H-3-W 52	116.22	131.14	131.04	4.74817	4.75293	1783	63	3.25115
162-982A-13H-3-W 54	116.24	131.16	131.06	4.74851	4.7533	1550	70	3.19033
162-982A-13H-3-W 56	116.26	131.18	131.08	4.74885	4.75367	1769	46	3.24773
162-982A-13H-3-W 58	116.28	131.2	131.1	4.74919	4.75404	1823	71	3.26079
162-982A-13H-3-W 61	116.31	131.23	131.13	4.7497	4.7546	1768	88	3.24748
162-982A-13H-3-W 62	116.32	131.24	131.14	4.74987	4.75479	1907	63	3.28035
162-982A-13H-3-W 64	116.34	131.26	131.16	4.75021	4.75516	1928	71	3.28511
162-982A-13H-3-W 66	116.36	131.28	131.18	4.75055	4.75553	1858	60	3.26905
162-982A-13H-3-W 68.5	116.39	131.31	131.21	4.75106	4.75609	1491	66	3.17348
162-982A-13H-3-W 70.5	116.41	131.33	131.23	4.7514	4.75646	1828	40	3.26198
162-982A-13H-3-W 73	116.43	131.35	131.25	4.75174	4.75684	1712	46	3.2335
162-982A-13H-3-W 74	116.44	131.36	131.26	4.75192	4.75702	1660	76	3.22011
162-982A-13H-3-W 75	116.45	131.37	131.27	4.75209	4.75721	1766	37	3.24699
162-982A-13H-3-W 78	116.48	131.4	131.3	4.7526	4.75777	1689	61	3.22763
162-982A-13H-3-W 80	116.5	131.42	131.32	4.75294	4.75814	1686	59	3.22686
162-982A-13H-3-W 82	116.52	131.44	131.34	4.75328	4.75851	1568	45	3.19535
162-982A-13H-3-W 84	116.54	131.46	131.36	4.75362	4.75888	1655	73	3.2188
162-982A-13H-3-W 86	116.56	131.48	131.38	4.75396	4.75926	1515	62	3.18041
162-982A-13H-3-W 90	116.6	131.52	131.42	4.75464	4.76	1545	55	3.18893
162-982A-13H-3-W 92	116.62	131.54	131.44	4.75498	4.76037	1776	68	3.24944
162-982A-13H-3-W 93	116.63	131.55	131.45	4.75515	4.76056	1665	68	3.22141
162-982A-13H-3-W 96	116.66	131.58	131.48	4.75566	4.76112	1497	73	3.17522
162-982A-13H-3-W 98	116.68	131.6	131.5	4.756	4.76149	1637	68	3.21405
162-982A-13H-3-W 99	116.69	131.61	131.51	4.75617	4.76168	1774	56	3.24895
162-982A-13H-3-W 100	116.7	131.62	131.52	4.75634	4.76186	1849	90	3.26694
162-982A-13H-3-W 102	116.72	131.64	131.54	4.75668	4.76224	1708	61	3.23249
162-982A-13H-3-W 104	116.74	131.66	131.56	4.75702	4.76261	1492	81	3.17377
162-982A-13H-3-W 105	116.75	131.67	131.57	4.75719	4.76279	1468	32	3.16673
162-982A-13H-3-W 109	116.79	131.71	131.61	4.75787	4.76354	1651	39	3.21775
162-982A-13H-3-W 110	116.8	131.72	131.62	4.75804	4.76373	1892	40	3.27692
162-982A-13H-3-W 112	116.82	131.74	131.64	4.75838	4.7641	1952	90	3.29048
162-982A-13H-3-W 114	116.84	131.76	131.66	4.75872	4.76447	1907	86	3.28035
162-982A-13H-3-W 115	116.85	131.77	131.67	4.75889	4.76466	1972	92	3.29491
162-982A-13H-3-W 118	116.88	131.8	131.7	4.7594	4.76522	1775	42	3.2492
162-982A-13H-3-W 120	116.9	131.82	131.72	4.75974	4.76559	1858	54	3.26905
162-982A-13H-3-W 122	116.92	131.84	131.74	4.76008	4.76596	2044	62	3.31048
162-982A-13H-3-W 123	116.93	131.85	131.75	4.76025	4.76615	1848	44	3.2667
162-982A-13H-3-W 126	116.96	131.88	131.78	4.76076	4.7667	1643	69	3.21564
162-982A-13H-3-W 128	116.98	131.9	131.8	4.7611	4.76708	1790	48	3.25285
162-982A-13H-3-W 129	116.99	131.91	131.81	4.76127	4.76726	1922	59	3.28375
162-982A-13H-3-W 132	117.02	131.94	131.84	4.76178	4.76782	1792	56	3.25334
162-982A-13H-3-W 134	117.04	131.96	131.86	4.76212	4.76819	1965	38	3.29336
162-982A-13H-3-W 135	117.05	131.97	131.87	4.76229	4.76838	1969	46	3.29425
162-982A-13H-3-W 139	117.09	132.01	131.91	4.76297	4.76913	2048	58	3.31133
162-982A-13H-3-W 140	117.1	132.02	131.92	4.76314	4.76931	1945	46	3.28892
162-982A-13H-3-W 142	117.12	132.04	131.94	4.76348	4.76968	1824	123	3.26103
162-982A-13H-3-W 143	117.13	132.05	131.95	4.76365	4.76987	2005	38	3.30211
162-982A-13H-3-W 146	117.16	132.08	131.98	4.76416	4.77043	2255	58	3.35315
162-982A-13H-3-W 148.5	117.19	132.11	132.01	4.76467	4.77099	1976	43	3.29579
162-982A-13H-4-W 2	117.22	132.14	132.04	4.76518	4.77155	2478	31	3.3941
162-982A-13H-4-W 4	117.24	132.16	132.06	4.76552	4.77192	2415	62	3.38292
162-982A-13H-4-W 6	117.26	132.18	132.08	4.76586	4.77229	2480	77	3.39445
162-982A-13H-4-W 9	117.29	132.21	132.11	4.76637	4.77285	2635	59	3.42078
162-982A-13H-4-W 10	117.3	132.22	132.12	4.76654	4.77304	2502	117	3.39829
162-982A-13H-4-W 12	117.32	132.24	132.14	4.76688	4.77341	2416	50	3.3831
162-982A-13H-4-W 13	117.33	132.25	132.15	4.76705	4.77359	2673	94	3.427
162-982A-13H-4-W 16	117.36	132.28	132.18	4.76756	4.77415	2404	41	3.38093
162-982A-13H-4-W 19	117.39	132.31	132.21	4.76807	4.77471	3139	58	3.49679
162-982A-13H-4-W 20	117.4	132.32	132.22	4.76824	4.7749	3009	88	3.47842
162-982A-13H-4-W 21	117.41	132.33	132.23	4.76841	4.77508	3291	95	3.51733
162-982A-13H-4-W 23.5	117.44	132.36	132.26	4.76892	4.77564	3019	5	3.47986
162-982A-13H-4-W 26.5	117.47	132.39	132.29	4.76943	4.7762	2848	37	3.45454
162-982A-13H-4-W 28	117.48	132.4	132.3	4.7696	4.77639	3101	125	3.4915
162-982A-13H-4-W 30	117.5	132.42	132.32	4.76994	4.77676	2706	63	3.43233
162-982A-13H-4-W 32	117.52	132.44	132.34	4.77028	4.77713	2671	71	3.42667
162-982A-13H-4-W 33	117.53	132.45	132.35	4.77045	4.77732	2925	28	3.46613
162-982A-13H-4-W 35.5	117.56	132.48	132.38	4.77096	4.77788	2433	12	3.38614
162-982A-13H-4-W 39	117.59	132.51	132.41	4.77147	4.77844	2632	74	3.42029
162-982A-13H-4-W 40	117.6	132.52	132.42	4.77164	4.77862	2418	31	3.38346
162-982A-13H-4-W 42	117.62	132.54	132.44	4.77198	4.77899	2354	53	3.37181
162-982A-13H-4-W 44	117.64	132.56	132.46	4.77232	4.77937	2147	56	3.33183
162-982A-13H-4-W 46	117.66	132.58	132.48	4.77266	4.77974	1862	90	3.26998
162-982A-13H-4-W 48	117.68	132.6	132.5	4.773	4.78011	1912	93	3.28149
162-982A-13H-4-W 49	117.69	132.61	132.51	4.77317	4.7803	1870	43	3.27184
162-982A-13H-4-W 50	117.7	132.62	132.52	4.77334	4.78048	2112	83	3.32469
162-982A-13H-4-W 52	117.72	132.64	132.54	4.77369	4.78086	1917	86	3.28262
162-982A-13H-4-W 54	117.74	132.66	132.56	4.77402	4.78123	1605	106	3.20548
162-982A-13H-4-W 57	117.77	132.69	132.59	4.77454	4.78179	1641	50	3.21511
162-982A-13H-4-W 58	117.78	132.7	132.6	4.77471	4.78197	1875	59	3.273
162-982A-13H-4-W 60	117.8	132.72	132.62	4.77505	4.78235	1429	50	3.15503
162-982A-13H-4-W 62	117.82	132.74	132.64	4.77539	4.78272	1633	24	3.21299
162-982A-13H-4-W 64	117.84	132.76	132.66	4.77573	4.78309	1626	60	3.21112
162-982A-13H-4-W 65	117.85	132.77	132.67	4.7759	4.78328	1655	81	3.2188
162-982A-13H-4-W 67	117.87	132.79	132.69	4.77624	4.78365	1756	78	3.24452
162-982A-13H-4-W 68	117.88	132.8	132.7	4.77641	4.78383	1758	57	3.24502
162-982A-13H-4-W 69	117.89	132.81	132.71	4.77658	4.78402	1599	44	3.20385
162-982A-13H-4-W 71	117.91	132.83	132.73	4.77692	4.78439	1574	98	3.197
162-982A-13H-4-W 72	117.92	132.84	132.74	4.77709	4.78458	1613	78	3.20763
162-982A-13H-4-W 73	117.93	132.85	132.75	4.77726	4.78477	1683	59	3.22608
162-982A-13H-4-W 76	117.96	132.88	132.78	4.77777	4.78532	1582	74	3.19921
162-982A-13H-4-W 78	117.98	132.9	132.8	4.77811	4.7857	1438	-9	3.15776
162-982A-13H-4-W 79	117.99	132.91	132.81	4.77828	4.78588	1384	72	3.14114
162-982A-13H-4-W 80	118	132.92	132.82	4.77845	4.78607	1491	68	3.17348
162-982A-13H-4-W 82	118.02	132.94	132.84	4.77879	4.78644	1426	30	3.15412
162-982A-13H-4-W 84	118.04	132.96	132.86	4.77913	4.78681	1627	81	3.21139
162-982A-13H-4-W 87	118.07	132.99	132.89	4.77964	4.78737	1530	15	3.18469
162-982A-13H-4-W 88	118.08	133	132.9	4.77981	4.78756	1480	88	3.17026
162-982A-13H-4-W 90	118.1	133.02	132.92	4.78015	4.78793	1573	69	3.19673
162-982A-13H-4-W 91	118.11	133.03	132.93	4.78032	4.78812	1477	68	3.16938
162-982A-13H-4-W 93.5	118.14	133.06	132.96	4.78083	4.78868	1371	72	3.13704
162-982A-13H-4-W 97	118.17	133.09	132.99	4.78134	4.78923	1535	80	3.18611
162-982A-13H-4-W 99.5	118.2	133.12	133.02	4.78185	4.78979	1536	75	3.18639
162-982A-13H-4-W 100	118.2	133.12	133.02	4.78185	4.78979	1549	19	3.19005
162-982A-13H-4-W 101	118.21	133.13	133.03	4.78202	4.78998	1775	49	3.2492
162-982A-13H-4-W 104	118.24	133.16	133.06	4.78253	4.79054	1672	41	3.22324
162-982A-13H-4-W 106	118.26	133.18	133.08	4.78287	4.79091	1365	67	3.13513
162-982A-13H-4-W 107	118.27	133.19	133.09	4.78304	4.7911	1526	49	3.18355
162-982A-13H-4-W 109	118.29	133.21	133.11	4.78338	4.79147	1693	14	3.22866
162-982A-13H-4-W 110	118.3	133.22	133.12	4.78355	4.79165	1682	113	3.22583
162-982A-13H-4-W 112	118.32	133.24	133.14	4.78389	4.79203	1643	40	3.21564
162-982A-13H-4-W 114	118.34	133.26	133.16	4.78423	4.7924	1453	49	3.16227
162-982A-13H-4-W 116	118.36	133.28	133.18	4.78457	4.79277	1556	47	3.19201
162-982A-13H-4-W 119	118.39	133.31	133.21	4.78508	4.79333	1624	32	3.21059
162-982A-13H-4-W 120	118.4	133.32	133.22	4.78525	4.79352	1662	80	3.22063
162-982A-13H-4-W 122	118.42	133.34	133.24	4.78559	4.79389	1594	89	3.20249
162-982B-14H-1-W 123.5	120.74	133.34	133.24	4.78559	4.79389	1443	91	3.15927
162-982B-14H-1-W 126	120.76	133.36	133.26	4.78593	4.79426	1832	89	3.26293
162-982B-14H-1-W 128	120.78	133.38	133.28	4.78627	4.79463	1939	60	3.28758
162-982B-14H-1-W 130	120.8	133.4	133.3	4.78661	4.79501	1619	72	3.20925
162-982B-14H-1-W 132	120.82	133.42	133.32	4.78695	4.79538	1521	41	3.18213
162-982B-14H-1-W 133	120.83	133.43	133.33	4.78712	4.79556	1323	78	3.12156
162-982B-14H-1-W 136.5	120.87	133.47	133.37	4.7878	4.79631	1986	42	3.29798
162-982B-14H-1-W 139	120.89	133.49	133.39	4.78814	4.79668	1596	30	3.20303
162-982B-14H-1-W 140	120.9	133.5	133.4	4.78831	4.79687	1413	86	3.15014
162-982B-14H-2-W 2	121.02	133.62	133.52	4.79035	4.7991	1571	62	3.19618
162-982B-14H-2-W 3	121.03	133.63	133.53	4.79052	4.79929		66
162-982B-14H-2-W 6	121.06	133.66	133.56	4.79103	4.79985	1277	38	3.10619
162-982B-14H-2-W 8	121.08	133.68	133.58	4.79137	4.80022	1327	64	3.12287
162-982B-14H-2-W 9	121.09	133.69	133.59	4.79154	4.80041	1321	59	3.1209
162-982B-14H-2-W 14	121.14	133.74	133.64	4.79239	4.80134	1507	51	3.17811
162-982B-14H-2-W 17	121.17	133.77	133.67	4.7929	4.8019	1366	35	3.13545
162-982B-14H-2-W 18	121.18	133.78	133.68	4.79307	4.80208	1452	28	3.16197
162-982B-14H-2-W 20	121.2	133.8	133.7	4.79341	4.80245	1556	59	3.19201
162-982B-14H-2-W 22	121.22	133.82	133.72	4.79375	4.80283	1638	28	3.21431
162-982B-14H-2-W 24	121.24	133.84	133.74	4.79409	4.8032	1533	64	3.18554
162-982B-14H-2-W 27	121.27	133.87	133.77	4.7946	4.80376	1503	108	3.17696
162-982B-14H-2-W 28	121.28	133.88	133.78	4.79477	4.80394	1552	60	3.19089
162-982B-14H-2-W 30	121.3	133.9	133.8	4.79512	4.80432	1682	122	3.22583
162-982B-14H-2-W 31	121.31	133.91	133.81	4.79529	4.8045	1532	91	3.18526
162-982B-14H-2-W 34	121.34	133.94	133.84	4.7958	4.80506	1700	73	3.23045
162-982B-14H-2-W 36	121.36	133.96	133.86	4.79614	4.80543	1399	51	3.14582
162-982B-14H-2-W 38	121.38	133.98	133.88	4.79648	4.80581	1532	14	3.18526
162-982B-14H-2-W 41	121.41	134.01	133.91	4.79699	4.80636	1533	50	3.18554
162-982B-14H-2-W 42	121.42	134.02	133.92	4.79716	4.80655	1393	35	3.14395
162-982B-14H-2-W 44	121.44	134.04	133.94	4.7975	4.80692	1524	89	3.18299
162-982B-14H-2-W 45	121.45	134.05	133.95	4.79767	4.80711	1460	105	3.16435
162-982B-14H-2-W 46	121.46	134.06	133.96	4.79784	4.8073	1388	74	3.14239
162-982B-14H-2-W 48	121.48	134.08	133.98	4.79818	4.80767	1515	47	3.18041
162-982B-14H-2-W 49	121.49	134.09	133.99	4.79835	4.80785	1574	60	3.197
162-982B-14H-2-W 54	121.54	134.14	134.04	4.7992	4.80878	1737	55	3.2398
162-982B-14H-2-W 56	121.56	134.16	134.06	4.79954	4.80916	1526	71	3.18355
162-982B-14H-2-W 58	121.58	134.18	134.08	4.79988	4.80953	1557	77	3.19229
162-982B-14H-2-W 60	121.6	134.2	134.1	4.80022	4.8099	1732	98	3.23855
162-982B-14H-2-W 62	121.62	134.22	134.12	4.80056	4.81027	1738	71	3.24005
162-982B-14H-2-W 65	121.65	134.25	134.15	4.80107	4.81083	1914	93	3.28194
162-982B-14H-2-W 66	121.66	134.26	134.16	4.80124	4.81102	1909	52	3.28081
162-982B-14H-2-W 67	121.67	134.27	134.17	4.80141	4.8112	1587	71	3.20058
162-982B-14H-2-W 70	121.7	134.3	134.2	4.80192	4.81176	1693	100	3.22866
162-982B-14H-2-W 72	121.72	134.32	134.22	4.80226	4.81214	1864	65	3.27045
162-982B-14H-2-W 74	121.74	134.34	134.24	4.8026	4.81251	1806	4	3.25672
162-982B-14H-2-W 77.5	121.78	134.38	134.28	4.80328	4.81325	1938	87	3.28735
162-982B-14H-2-W 80	121.8	134.4	134.3	4.80362	4.81363	1722	79	3.23603
162-982B-14H-2-W 82	121.82	134.42	134.32	4.80396	4.814	1790	58	3.25285
162-982B-14H-2-W 85	121.85	134.45	134.35	4.80447	4.81456	2055	56	3.31281
162-982B-14H-2-W 86	121.86	134.46	134.36	4.80464	4.81474	1651	40	3.21775
162-982B-14H-2-W 88	121.88	134.48	134.38	4.80498	4.81511	1844	12	3.26576
162-982B-14H-2-W 94	121.94	134.54	134.44	4.806	4.81623	1912	19	3.28149
162-982B-14H-2-W 95	121.95	134.55	134.45	4.80617	4.81642	1901	39	3.27898
162-982B-14H-2-W 98	121.98	134.58	134.48	4.80668	4.81698	2053	13	3.31239
162-982B-14H-2-W 99	121.99	134.59	134.49	4.80685	4.81716	1982	58	3.2971
162-982B-14H-2-W 102	122.02	134.62	134.52	4.80736	4.81772	1878	118	3.2737
162-982B-14H-2-W 104	122.04	134.64	134.54	4.8077	4.81809	1808	79	3.2572
162-982B-14H-2-W 105	122.05	134.65	134.55	4.80787	4.81828	2068	85	3.31555
162-982B-14H-2-W 108	122.08	134.68	134.58	4.80838	4.81884	2038	52	3.3092
162-982B-14H-2-W 110	122.1	134.7	134.6	4.80872	4.81921	1915	84	3.28217
162-982B-14H-2-W 112	122.12	134.72	134.62	4.80906	4.81958	1959	99	3.29203
162-982B-14H-2-W 115	122.15	134.75	134.65	4.80957	4.82014	1967	37	3.2938
162-982B-14H-2-W 116	122.16	134.76	134.66	4.80974	4.82033	1841	54	3.26505
162-982B-14H-2-W 118	122.18	134.78	134.68	4.81008	4.8207	1868	98	3.27138
162-982B-14H-2-W 119	122.19	134.79	134.69	4.81025	4.82089	1770	127	3.24797
162-982B-14H-2-W 122	122.22	134.82	134.72	4.81076	4.82145	1713	34	3.23376
162-982B-14H-2-W 124	122.24	134.84	134.74	4.8111	4.82182	1732	44	3.23855
162-982B-14H-2-W 127	122.27	134.87	134.77	4.81161	4.82238	1778	44	3.24993
162-982B-14H-2-W 129	122.29	134.89	134.79	4.81195	4.82275	1600	23	3.20412
162-982B-14H-2-W 133.5	122.34	134.94	134.84	4.8128	4.82368	1848	-29	3.2667
162-982B-14H-2-W 136	122.36	134.96	134.86	4.81314	4.82405	1601	36	3.20439
162-982B-14H-2-W 138	122.38	134.98	134.88	4.81348	4.82442	1593	27	3.20222
162-982B-14H-2-W 139	122.39	134.99	134.89	4.81365	4.82461	1965	112	3.29336
162-982B-14H-2-W 142	122.42	135.02	134.92	4.81416	4.82517	1823	53	3.26079
162-982B-14H-2-W 143	122.43	135.03	134.93	4.81433	4.82536	1663	50	3.22089
162-982B-14H-3-W 3	122.53	135.13	135.03	4.81603	4.82722	1989	104	3.29863
162-982B-14H-3-W 4	122.54	135.14	135.04	4.8162	4.8274	1616	99	3.20844
162-982B-14H-3-W 9	122.59	135.19	135.09	4.81706	4.82833	1516	74	3.1807
162-982B-14H-3-W 10	122.6	135.2	135.1	4.81723	4.82852	1607	56	3.20602
162-982B-14H-3-W 13	122.63	135.23	135.13	4.81774	4.82908	1223	26	3.08743
162-982B-14H-3-W 14	122.64	135.24	135.14	4.81791	4.82927	1480	63	3.17026
162-982B-14H-3-W 15	122.65	135.25	135.15	4.81808	4.82945	1513	128	3.17984
162-982B-14H-3-W 18	122.68	135.28	135.18	4.81859	4.83001	1590	22	3.2014
162-982B-14H-3-W 19	122.69	135.29	135.19	4.81876	4.8302	1379	56	3.13956
162-982B-14H-3-W 24	122.74	135.34	135.24	4.81961	4.83113	1421	14	3.15259
162-982B-14H-3-W 25	122.75	135.35	135.25	4.81978	4.83131	1517	88	3.18099
162-982B-14H-3-W 27	122.77	135.37	135.27	4.82012	4.83169	1456	90	3.16316
162-982B-14H-3-W 30	122.8	135.4	135.3	4.82063	4.83224	1602	76	3.20466
162-982B-14H-3-W 31	122.81	135.41	135.31	4.8208	4.83243	1552	101	3.19089
162-982B-14H-3-W 34	122.84	135.44	135.34	4.82131	4.83299	1617	27	3.20871
162-982B-14H-3-W 37	122.87	135.47	135.37	4.82182	4.83355	1734	84	3.23905
162-982B-14H-3-W 38	122.88	135.48	135.38	4.82199	4.83373	1788	93	3.25237
162-982B-14H-3-W 40	122.9	135.5	135.4	4.82233	4.83411	2037	76	3.30899
162-982B-14H-3-W 43	122.93	135.53	135.43	4.82284	4.83467	1507	79	3.17811
162-982B-14H-3-W 44	122.94	135.54	135.44	4.82301	4.83485	1705	67	3.23172
162-982B-14H-3-W 46	122.96	135.56	135.46	4.82335	4.83522	1825	47	3.26126
162-982B-14H-3-W 47	122.97	135.57	135.47	4.82352	4.83541	1826	68	3.2615
162-982B-14H-3-W 51	123.01	135.61	135.51	4.8242	4.83615	1818	41	3.25959
162-982B-14H-3-W 52	123.02	135.62	135.52	4.82437	4.83634	2006	121	3.30233
162-982B-14H-3-W 55	123.05	135.65	135.55	4.82488	4.8369	1762	56	3.24601
162-982B-14H-3-W 56	123.06	135.66	135.56	4.82505	4.83709	2027	82	3.30685
162-982B-14H-3-W 58	123.08	135.68	135.58	4.82539	4.83746	1796	81	3.25431
162-982B-14H-3-W 63	123.13	135.73	135.63	4.82624	4.83839	2098	90	3.32181
162-982B-14H-3-W 64	123.14	135.74	135.64	4.82641	4.83858	1839	98	3.26458
162-982B-14H-3-W 68.5	123.19	135.79	135.69	4.82726	4.83951	1838	85	3.26435
162-982B-14H-3-W 71	123.21	135.81	135.71	4.8276	4.83988	1616	51	3.20844
162-982B-14H-3-W 72	123.22	135.82	135.72	4.82777	4.84007	1717	91	3.23477
162-982B-14H-3-W 73	123.23	135.83	135.73	4.82794	4.84025	2011	68	3.30341
162-982B-14H-3-W 77.5	123.28	135.88	135.78	4.82879	4.84118	1847	40	3.26647
162-982B-14H-3-W 80	123.3	135.9	135.8	4.82913	4.84155	1771	55	3.24822
162-982B-14H-3-W 81	123.31	135.91	135.81	4.8293	4.84174	1854	71	3.26811
162-982B-14H-3-W 83.5	123.34	135.94	135.84	4.82981	4.8423	1739	58	3.2403
162-982B-14H-3-W 86	123.36	135.96	135.86	4.83015	4.84267	1765	30	3.24674
162-982B-14H-3-W 88	123.38	135.98	135.88	4.83049	4.84304	1747	96	3.24229
162-982B-14H-3-W 89	123.39	135.99	135.89	4.83066	4.84323	1705	70	3.23172
162-982B-14H-3-W 92	123.42	136.02	135.92	4.83117	4.84379	1897	65	3.27807
162-982B-14H-3-W 94	123.44	136.04	135.94	4.83151	4.84416	1808	70	3.2572
162-982B-14H-3-W 97	123.47	136.07	135.97	4.83202	4.84472	1872	50	3.27231
162-982B-14H-3-W 98	123.48	136.08	135.98	4.83219	4.84491	1898	104	3.2783
162-982B-14H-3-W 103	123.53	136.13	136.03	4.83304	4.84584	2088	69	3.31973
162-982B-14H-3-W 104	123.54	136.14	136.04	4.83321	4.84602	1963	76	3.29292
162-982B-14H-3-W 106	123.56	136.16	136.06	4.83355	4.8464	1990	15	3.29885
162-982B-14H-3-W 108	123.58	136.18	136.08	4.83389	4.84677	1855	84	3.26834
162-982B-14H-3-W 109	123.59	136.19	136.09	4.83406	4.84695	1957	46	3.29159
162-982B-14H-3-W 112	123.62	136.22	136.12	4.83457	4.84751	2015	65	3.30428
162-982B-14H-3-W 114.5	123.65	136.25	136.15	4.83508	4.84807	1991	63	3.29907
162-982B-14H-3-W 115.5	123.66	136.26	136.16	4.83525	4.84826	1906	75	3.28012
162-982B-14H-3-W 118	123.68	136.28	136.18	4.83559	4.84863	1973	58	3.29513
162-982B-14H-3-W 120	123.7	136.3	136.2	4.83593	4.849	1693	62	3.22866
162-982B-14H-3-W 123	123.73	136.33	136.23	4.83644	4.84956	2127	31	3.32777
162-982B-14H-3-W 124	123.74	136.34	136.24	4.83661	4.84975	1902	85	3.27921
162-982B-14H-3-W 128	123.78	136.38	136.28	4.83729	4.85049	1989	36	3.29863
162-982B-14H-3-W 130	123.8	136.4	136.3	4.83763	4.85086	2015	41	3.30428
162-982B-14H-3-W 132	123.82	136.42	136.32	4.83798	4.85124	2018	44	3.30492
162-982B-14H-3-W 135	123.85	136.45	136.35	4.83849	4.8518	2222	53	3.34674
162-982B-14H-3-W 136	123.86	136.46	136.36	4.83866	4.85198	2200	106	3.34242
162-982B-14H-3-W 138	123.88	136.48	136.38	4.839	4.85235	2097	61	3.3216
162-982B-14H-3-W 139	123.89	136.49	136.39	4.83917	4.85254	2324	146	3.36624
162-982B-14H-3-W 143	123.93	136.53	136.43	4.83985	4.85328	2252	53	3.35257
162-982B-14H-3-W 144	123.94	136.54	136.44	4.84002	4.85347	2311	112	3.3638
162-982B-14H-3-W 146	123.96	136.56	136.46	4.84036	4.85384	2497	105	3.39742
162-982B-14H-3-W 148	123.98	136.58	136.48	4.8407	4.85422	2177	11	3.33786
162-982B-14H-3-W 149	123.99	136.59	136.49	4.84087	4.8544	2197	77	3.34183
162-982B-14H-4-W 2	124.02	136.62	136.52	4.84138	4.85496	2221	62	3.34655
162-982B-14H-4-W 3	124.03	136.63	136.53	4.84155	4.85515	2056	24	3.31302
162-982B-14H-4-W 7	124.07	136.67	136.57	4.84223	4.85589	2263	44	3.35468
162-982B-14H-4-W 8	124.08	136.68	136.58	4.8424	4.85608	2280	88	3.35793
162-982B-14H-4-W 10	124.1	136.7	136.6	4.84274	4.85645	2227	53	3.34772
162-982B-14H-4-W 11.5	124.12	136.72	136.62	4.84308	4.85682	2038	49	3.3092
162-982B-14H-4-W 14	124.14	136.74	136.64	4.84342	4.85719	2252	105	3.35257
162-982B-14H-4-W 18	124.18	136.78	136.68	4.8441	4.85794	1601	57	3.20439
162-982B-14H-4-W 20	124.2	136.8	136.7	4.84444	4.85831	2120	95	3.32634
162-982B-14H-4-W 21	124.21	136.81	136.71	4.84461	4.8585	1916	55	3.2824
162-982B-14H-4-W 24	124.24	136.84	136.74	4.84512	4.85906	2072	130	3.31639
162-982B-14H-4-W 28	124.28	136.88	136.78	4.8458	4.8598	2255	74	3.35315
162-982B-14H-4-W 35	124.35	136.95	136.85	4.84699	4.8611	2069	39	3.31576
162-982B-14H-4-W 36	124.36	136.96	136.86	4.84716	4.86129	1773	53	3.24871
162-982B-14H-4-W 38	124.38	136.98	136.88	4.8475	4.86166	1579	79	3.19838
162-982B-14H-4-W 40	124.4	137	136.9	4.84784	4.86204	1540	99	3.18752
162-982B-14H-4-W 41	124.41	137.01	136.91	4.84801	4.86222	1728	52	3.23754
162-982B-14H-4-W 42	124.42	137.02	136.92	4.84818	4.86241	1699	93	3.23019
162-982B-14H-4-W 43	124.43	137.03	136.93	4.84835	4.86259	1783	92	3.25115
162-982B-14H-4-W 46	124.46	137.06	136.96	4.84886	4.86315	1658	69	3.21958
162-982B-14H-4-W 50	124.5	137.1	137	4.84954	4.8639	1800	96	3.25527
162-982B-14H-4-W 51	124.51	137.11	137.01	4.84971	4.86408	1628	50	3.21165
162-982B-14H-4-W 52	124.52	137.12	137.02	4.84988	4.86427	1653	72	3.21827
162-982B-14H-4-W 56	124.56	137.16	137.06	4.85056	4.86501	1708	76	3.23249
162-982B-14H-4-W 58	124.58	137.18	137.08	4.8509	4.86539	1314	94	3.1186
162-982B-14H-4-W 61	124.61	137.21	137.11	4.85141	4.86595	1634	70	3.21325
162-982B-14H-4-W 62	124.62	137.22	137.12	4.85158	4.86613	1609	53	3.20656
162-982B-14H-4-W 64	124.64	137.24	137.14	4.85192	4.8665	1610	52	3.20683
162-982B-14H-4-W 65	124.65	137.25	137.15	4.85209	4.86669	1460	54	3.16435
162-982B-14H-4-W 68	124.68	137.28	137.18	4.8526	4.86725	1388	25	3.14239
162-982B-14H-4-W 73	124.73	137.33	137.23	4.85345	4.86818	1682	50	3.22583
162-982B-14H-4-W 74	124.74	137.34	137.24	4.85362	4.86837	1647	105	3.21669
162-982B-14H-4-W 75	124.75	137.35	137.25	4.85379	4.86855	1504	50	3.17725
162-982B-14H-4-W 78	124.78	137.38	137.28	4.8543	4.86911	1911	93	3.28126
162-982B-14H-4-W 81	124.81	137.41	137.31	4.85481	4.86967	1695	59	3.22917
162-982B-14H-4-W 82	124.82	137.42	137.32	4.85498	4.86986	1732	66	3.23855
162-982B-14H-4-W 83.5	124.84	137.44	137.34	4.85532	4.87023	1747	113	3.24229
162-982B-14H-4-W 86	124.86	137.46	137.36	4.85566	4.8706	1980	63	3.29667
162-982B-14H-4-W 88	124.88	137.48	137.38	4.856	4.87097	1801	64	3.25551
162-982B-14H-4-W 91	124.91	137.51	137.41	4.85651	4.87153	1704	64	3.23147
162-982B-14H-4-W 92	124.92	137.52	137.42	4.85668	4.87172	1653	79	3.21827
162-982B-14H-4-W 95	124.95	137.55	137.45	4.85719	4.87228	1629	90	3.21192
162-982B-14H-4-W 96	124.96	137.56	137.46	4.85736	4.87246	1735	100	3.2393
162-982B-14H-4-W 99	124.99	137.59	137.49	4.85787	4.87302	1511	90	3.17926
162-982B-14H-4-W 100	125	137.6	137.5	4.85804	4.87321	1486	89	3.17202
162-982B-14H-4-W 102	125.02	137.62	137.52	4.85838	4.87358	1526	49	3.18355
162-982B-14H-4-W 103	125.03	137.63	137.53	4.85855	4.87377	1569	106	3.19562
162-982B-14H-4-W 105.5	125.06	137.66	137.56	4.85906	4.87432	1702	70	3.23096
162-982B-14H-4-W 108	125.08	137.68	137.58	4.8594	4.8747	1636	68	3.21378
162-982B-14H-4-W 113	125.13	137.73	137.63	4.86026	4.87563	1613	58	3.20763
162-982B-14H-4-W 118	125.18	137.78	137.68	4.86111	4.87636	1596	102	3.20303
162-982B-14H-4-W 119	125.19	137.79	137.69	4.86128	4.87648	1868	54	3.27138
162-982B-14H-4-W 122	125.22	137.82	137.72	4.86179	4.87685	1723	75	3.23629
162-982B-14H-4-W 125	125.25	137.85	137.75	4.8623	4.87721	1685	68	3.2266
162-982B-14H-4-W 126	125.26	137.86	137.76	4.86247	4.87733	1798	99	3.25479
162-982B-14H-4-W 127	125.27	137.87	137.77	4.86264	4.87745	1994	64	3.29973
162-982B-14H-4-W 130	125.3	137.9	137.8	4.86315	4.87782	2118	100	3.32593
162-982B-14H-4-W 132	125.32	137.92	137.82	4.86349	4.87806	2017	106	3.30471
162-982B-14H-4-W 135	125.35	137.95	137.85	4.864	4.87842	1997	98	3.30038
162-982B-14H-4-W 136	125.36	137.96	137.86	4.86417	4.87854	2212	80	3.34479
162-982B-14H-4-W 138.5	125.39	137.99	137.89	4.86468	4.8789	2007	52	3.30255
162-982B-14H-4-W 141	125.41	138.01	137.91	4.86502	4.87915	2001	91	3.30125
162-982B-14H-4-W 142	125.42	138.02	137.92	4.86519	4.87927	1657	72	3.21932
162-982B-14H-4-W 144	125.44	138.04	137.94	4.86553	4.87951	1543	27	3.18837
162-982B-14H-4-W 146	125.46	138.06	137.96	4.86587	4.87975	1368	96	3.13609
162-982B-14H-5-W 4.5	125.55	138.15	138.05	4.8674	4.88084	1788	30	3.25237
162-982B-14H-5-W 6	125.56	138.16	138.06	4.86757	4.88096	1668	90	3.2222
162-982B-14H-5-W 11	125.61	138.21	138.11	4.86842	4.88157	1796	105	3.25431
162-982B-14H-5-W 12	125.62	138.22	138.12	4.86859	4.88169	1774	39	3.24895
162-982B-14H-5-W 13	125.63	138.23	138.13	4.86876	4.88181	1682	100	3.22583
162-982B-14H-5-W 15.5	125.66	138.26	138.16	4.86927	4.88217	1794	104	3.25382
162-982B-14H-5-W 19	125.69	138.29	138.19	4.86978	4.88253	1668	67	3.2222
162-982B-14H-5-W 20	125.7	138.3	138.2	4.86995	4.88266	1528	54	3.18412
162-982B-14H-5-W 22	125.72	138.32	138.22	4.87029	4.8829	1668	41	3.2222
162-982B-14H-5-W 23	125.73	138.33	138.23	4.87046	4.88302	1709	50	3.23274
162-982B-14H-5-W 25	125.75	138.35	138.25	4.8708	4.88326	1958	99	3.29181
162-982B-14H-5-W 27	125.77	138.37	138.27	4.87114	4.8835	1711	37	3.23325
162-982B-14H-5-W 30	125.8	138.4	138.3	4.87165	4.88387	1641	49	3.21511
162-982B-14H-5-W 31	125.81	138.41	138.31	4.87182	4.88399	1847	27	3.26647
162-982B-14H-5-W 34	125.84	138.44	138.34	4.87233	4.88435	1525	-1	3.18327
162-982B-14H-5-W 38	125.88	138.48	138.38	4.87301	4.88483	1688	31	3.22737
162-982B-14H-5-W 43	125.93	138.53	138.43	4.87386	4.88544	1727	57	3.23729
162-982B-14H-5-W 44	125.94	138.54	138.44	4.87403	4.88556	1578	135	3.19811
162-982B-14H-5-W 46.5	125.97	138.57	138.47	4.87454	4.88592	1618	30	3.20898
162-982B-14H-5-W 49	125.99	138.59	138.49	4.87488	4.88617	1690	127	3.22789
162-982B-14H-5-W 51	126.01	138.61	138.51	4.87522	4.88641	1630	48	3.21219
162-982B-14H-5-W 52	126.02	138.62	138.52	4.87539	4.88653	1473	81	3.1682
162-982B-14H-5-W 53	126.03	138.63	138.53	4.87556	4.88665	1477	17	3.16938
162-982B-14H-5-W 56	126.06	138.66	138.56	4.87607	4.88701	1439	98	3.15806
162-982B-14H-5-W 58	126.08	138.68	138.58	4.87641	4.88725	1375	20	3.1383
162-982B-14H-5-W 61	126.11	138.71	138.61	4.87692	4.88762	1593	6	3.20222
162-982B-14H-5-W 62	126.12	138.72	138.62	4.87709	4.88774	1835	79	3.26364
162-982B-14H-5-W 64	126.14	138.74	138.64	4.87743	4.88798	1581	85	3.19893
162-982B-14H-5-W 65	126.15	138.75	138.65	4.8776	4.8881	1681	55	3.22557
162-982B-14H-5-W 66	126.16	138.76	138.66	4.87777	4.88822	1772	58	3.24846
162-982B-14H-5-W 68	126.18	138.78	138.68	4.87811	4.88846	1908	55	3.28058
162-982B-14H-5-W 71	126.21	138.81	138.71	4.87862	4.88883	2052	85	3.31218
162-982B-14H-5-W 72	126.22	138.82	138.72	4.87879	4.88895	2141	101	3.33062
162-982B-14H-5-W 73	126.23	138.83	138.73	4.87896	4.88907	1928	79	3.28511
162-982B-14H-5-W 76	126.26	138.86	138.76	4.87947	4.88943	1983	61	3.29732
162-982B-14H-5-W 77	126.27	138.87	138.77	4.87964	4.88955	1889	62	3.27623
162-982B-14H-5-W 79	126.29	138.89	138.79	4.87998	4.8898	2212	21	3.34479
162-982B-14H-5-W 83.5	126.34	138.94	138.84	4.88083	4.8904	2515	79	3.40054
162-982B-14H-5-W 86	126.36	138.96	138.86	4.88117	4.89064	2678	59	3.42781
162-982B-14H-5-W 88.5	126.39	138.99	138.89	4.88169	4.89101	3048	7	3.48401
162-982B-14H-5-W 89.5	126.4	139	138.9	4.88185	4.89113	2444	13	3.3881
162-982B-14H-5-W 92	126.42	139.02	138.92	4.8822	4.89137	2309	58	3.36342
162-982B-14H-5-W 93	126.43	139.03	138.93	4.88237	4.89149	2246	75	3.35141
162-982B-14H-5-W 98	126.48	139.08	138.98	4.88322	4.8921	2122	150	3.32675
162-982B-14H-5-W 100	126.5	139.1	139	4.88356	4.89234	2201	86	3.34262
162-982B-14H-5-W 102	126.52	139.12	139.02	4.8839	4.89258	2137	89	3.3298
162-982B-14H-5-W 104.5	126.55	139.15	139.05	4.88441	4.89294	2200	92	3.34242
162-982B-14H-5-W 106.5	126.57	139.17	139.07	4.88475	4.89318	2071	92	3.31618
162-982B-14H-5-W 108	126.58	139.18	139.08	4.88492	4.89331	2116	79	3.32552
162-982B-14H-5-W 110.5	126.61	139.21	139.11	4.88543	4.89367	2189	53	3.34025
162-982B-14H-5-W 111.5	126.62	139.22	139.12	4.8856	4.89379	2060	92	3.31387
162-982B-14H-5-W 114	126.64	139.24	139.14	4.88594	4.89403	2150	73	3.33244
162-982B-14H-5-W 116	126.66	139.26	139.16	4.88628	4.89427	2183	99	3.33905
162-982B-14H-5-W 119	126.69	139.29	139.19	4.88679	4.89464	2105	69	3.32325
162-982B-14H-5-W 123.5	126.74	139.34	139.24	4.88764	4.89524	2324	2	3.36624
162-982B-14H-5-W 126	126.76	139.36	139.26	4.88798	4.89548	2382	51	3.37694
162-982B-14H-5-W 128	126.78	139.38	139.28	4.88832	4.89573	2565	111	3.40909
162-982B-14H-5-W 129	126.79	139.39	139.29	4.88849	4.89585	2745	101	3.43854
162-982B-14H-5-W 130	126.8	139.4	139.3	4.88866	4.89597	2728	67	3.43584
162-982B-14H-5-W 131	126.81	139.41	139.31	4.88883	4.89609	3093	57	3.49038
162-982B-14H-5-W 133.5	126.84	139.44	139.34	4.88934	4.89645	2834	101	3.4524
162-982B-14H-5-W 136	126.86	139.46	139.36	4.88968	4.89669	3271	58	3.51468
162-982B-14H-5-W 139	126.89	139.49	139.39	4.89019	4.89706	3011	72	3.47871
162-982B-14H-5-W 140	126.9	139.5	139.4	4.89036	4.89718	2958	56	3.471
162-982B-14H-5-W 143	126.93	139.53	139.43	4.89087	4.89754	3287	65	3.5168
162-982B-14H-5-W 144	126.94	139.54	139.44	4.89104	4.89766	3114	109	3.49332
162-982B-14H-5-W 148	126.98	139.58	139.48	4.89172	4.89815	3090	109	3.48996
162-982B-14H-5-W 149	126.99	139.59	139.49	4.89189	4.89827	3257	81	3.51282
162-982B-14H-6-W 2	127.02	139.62	139.52	4.8924	4.89863	2903	61	3.46285
162-982B-14H-6-W 3	127.03	139.63	139.53	4.89257	4.89875	3324	80	3.52166
162-982B-14H-6-W 5.5	127.06	139.66	139.56	4.89308	4.89911	2976	77	3.47363
162-982B-14H-6-W 8	127.08	139.68	139.58	4.89342	4.89936	3146	82	3.49776
162-982B-14H-6-W 9	127.09	139.69	139.59	4.89359	4.89948	3099	143	3.49122
162-982B-14H-6-W 14	127.14	139.74	139.64	4.89444	4.90008	2985	80	3.47494
162-982B-14H-6-W 15	127.15	139.75	139.65	4.89461	4.9002	2742	100	3.43807
162-982B-14H-6-W 18	127.18	139.78	139.68	4.89512	4.90057	3083	58	3.48897
162-982B-14H-6-W 19	127.19	139.79	139.69	4.89529	4.90069	2920	123	3.46538
162-982B-14H-6-W 22	127.22	139.82	139.72	4.8958	4.90105	2800	107	3.44716
162-982B-14H-6-W 25.5	127.26	139.86	139.76	4.89648	4.90153	2510	30	3.39967
162-982B-14H-6-W 27	127.27	139.87	139.77	4.89665	4.90166	2621	22	3.41847
162-982B-14H-6-W 30	127.3	139.9	139.8	4.89716	4.90202	2792	77	3.44592
162-982B-14H-6-W 32	127.32	139.92	139.82	4.8975	4.90226	2501	63	3.39811
162-982B-14H-6-W 33	127.33	139.93	139.83	4.89767	4.90238	2586	93	3.41263
162-982B-14H-6-W 38	127.38	139.98	139.88	4.89852	4.90299	2440	97	3.38739
162-982B-14H-6-W 39	127.39	139.99	139.89	4.89869	4.90311	2522	83	3.40175
162-982B-14H-6-W 42	127.42	140.02	139.92	4.8992	4.90347	2418	97	3.38346
162-982B-14H-6-W 43	127.43	140.03	139.93	4.89937	4.90359	2605	67	3.41581
162-982B-14H-6-W 45.5	127.46	140.06	139.96	4.89988	4.90396	2410	112	3.38202
162-982B-14H-6-W 48	127.48	140.08	139.98	4.90022	4.9042	2488	77	3.39585
162-982B-14H-6-W 53	127.53	140.13	140.03	4.90107	4.9048	2195	19	3.34143
162-982B-14H-6-W 54	127.54	140.14	140.04	4.90124	4.90492	2453	78	3.3897
162-982B-14H-6-W 55	127.55	140.15	140.05	4.90141	4.90504	2185	54	3.33945
162-982B-14H-6-W 56	127.56	140.16	140.06	4.90158	4.90517	2302	80	3.36211
162-982B-14H-6-W 58	127.58	140.18	140.08	4.90192	4.90541	2332	101	3.36773
162-982B-14H-6-W 60	127.6	140.2	140.1	4.90226	4.90565	1845	42	3.266
162-982B-14H-6-W 62	127.62	140.22	140.12	4.9026	4.90589	1844	79	3.26576
162-982B-14H-6-W 64	127.64	140.24	140.14	4.90294	4.90613	1939	81	3.28758
162-982B-14H-6-W 67	127.67	140.27	140.17	4.90346	4.9065	2059	81	3.31366
162-982B-14H-6-W 70	127.7	140.3	140.2	4.90397	4.90686	2055	33	3.31281
162-982B-14H-6-W 72.5	127.73	140.33	140.23	4.90448	4.90722	2118	87	3.32593
162-982B-14H-6-W 76	127.76	140.36	140.26	4.90499	4.90759	1574	62	3.197
162-982B-14H-6-W 78	127.78	140.38	140.28	4.90533	4.90783	2000	56	3.30103
162-982B-14H-6-W 80	127.8	140.4	140.3	4.90567	4.90807	1462	61	3.16495
162-982B-14H-6-W 82	127.82	140.42	140.32	4.90601	4.90831	1515	78	3.18041
162-982B-14H-6-W 84	127.84	140.44	140.34	4.90635	4.90855	1464	7	3.16554
162-982B-14H-6-W 86	127.86	140.46	140.36	4.90669	4.9088	1384	88	3.14114
162-982B-14H-6-W 87	127.87	140.47	140.37	4.90686	4.90892	1579	85	3.19838
162-982B-14H-6-W 89	127.89	140.49	140.39	4.9072	4.90916	1588	101	3.20085
162-982B-14H-6-W 94	127.94	140.54	140.44	4.90805	4.90976	1683	70	3.22608
162-982B-14H-6-W 96	127.96	140.56	140.46	4.90839	4.91001	1573	64	3.19673
162-982B-14H-6-W 98	127.98	140.58	140.48	4.90873	4.91025	1523	105	3.1827
162-982B-14H-6-W 100	128	140.6	140.5	4.90907	4.91049	1462	44	3.16495
162-982B-14H-6-W 102	128.02	140.62	140.52	4.90941	4.91073	1663	31	3.22089
162-982B-14H-6-W 104	128.04	140.64	140.54	4.90975	4.91097	1371	110	3.13704
162-982B-14H-6-W 105	128.05	140.65	140.55	4.90992	4.9111	1626	77	3.21112
162-982B-14H-6-W 107.5	128.08	140.68	140.58	4.91043	4.91146	2005	68	3.30211
162-982B-14H-7-W 2	128.12	140.72	140.62	4.91111	4.91194	1837	76	3.26411
162-982B-14H-7-W 4	128.14	140.74	140.64	4.91145	4.91218	1682	104	3.22583
162-982B-14H-7-W 6	128.16	140.76	140.66	4.91179	4.91243	2007	50	3.30255
162-982B-14H-7-W 8	128.18	140.78	140.68	4.91213	4.91267	1925	83	3.28443
162-982B-14H-7-W 9	128.19	140.79	140.69	4.9123	4.91279	2003	112	3.30168
162-982B-14H-7-W 12	128.22	140.82	140.72	4.91281	4.91315	1732	125	3.23855
162-982B-14H-7-W 14	128.24	140.84	140.74	4.91315	4.91339	1932	145	3.28601
162-982B-14H-7-W 15	128.25	140.85	140.75	4.91332	4.91352	2191	103	3.34064
162-982B-14H-7-W 16	128.26	140.86	140.76	4.91349	4.91364	2221	110	3.34655
162-982B-14H-7-W 18	128.28	140.88	140.78	4.91383	4.91388	2523	126	3.40192
162-982B-14H-7-W 20.5	128.31	140.91	140.81	4.91433	4.9143	2416	217	3.3831
162-982B-14H-7-W 26	128.36	140.96	140.86	4.91517	4.91505	2497	110	3.39742
162-982B-14H-7-W 29	128.39	140.99	140.89	4.91567	4.9155	2363	124	3.37346
162-982B-14H-7-W 30	128.4	141	140.9	4.91584	4.91565	2580	160	3.41162
162-982B-14H-7-W 32	128.42	141.02	140.92	4.91618	4.91596	2549	101	3.40637
162-982C-15H-1-W 74	128.04	141.12	140.96	4.91685	4.91656	2593	182	3.4138
162-982C-15H-1-W 76	128.06	141.14	140.98	4.91718	4.91686	2732	111	3.43648
162-982C-15H-1-W 77	128.07	141.15	140.99	4.91735	4.91701	2867	136	3.45743
162-982C-15H-1-W 80	128.1	141.18	141.02	4.91785	4.91746	2914	172	3.46449
162-982C-15H-1-W 82	128.12	141.2	141.04	4.91819	4.91776	3111	129	3.4929
162-982C-15H-1-W 84	128.14	141.22	141.06	4.91852	4.91806	3157	162	3.49927
162-982C-15H-1-W 86	128.16	141.24	141.08	4.91886	4.91836	3170	151	3.50106
162-982C-15H-1-W 87	128.17	141.25	141.09	4.91902	4.91851	3084	98	3.48911
162-982C-15H-1-W 92	128.22	141.3	141.14	4.91986	4.91926	3576	199	3.5534
162-982C-15H-1-W 94	128.24	141.32	141.16	4.9202	4.91956	3521	196	3.54667
162-982C-15H-1-W 96	128.26	141.34	141.18	4.92053	4.91986	3873	208	3.58805
162-982C-15H-1-W 98	128.28	141.36	141.2	4.92087	4.92017	3712	180	3.56961
162-982C-15H-1-W 100	128.3	141.38	141.22	4.9212	4.92047	3798	145	3.57956
162-982C-15H-1-W 101	128.31	141.39	141.23	4.92137	4.92062	4166	176	3.61972
162-982C-15H-1-W 104	128.34	141.42	141.26	4.92187	4.92107	4032	176	3.60552
162-982C-15H-1-W 106	128.36	141.44	141.28	4.9222	4.92137	4352	189	3.63869
162-982C-15H-1-W 108	128.38	141.46	141.3	4.92254	4.92167	5574	273	3.74617
162-982C-15H-1-W 111	128.41	141.49	141.33	4.92304	4.92212	5145	278	3.71139
162-982C-15H-1-W 112	128.42	141.5	141.34	4.92321	4.92227	5471	284	3.73807
162-982C-15H-1-W 114	128.44	141.52	141.36	4.92354	4.92257	6327	326	3.8012
162-982C-15H-1-W 116	128.46	141.54	141.38	4.92388	4.92287	7350	335	3.86629
162-982C-15H-1-W 117	128.47	141.55	141.39	4.92405	4.92302	7583	436	3.87984
162-982C-15H-1-W 120	128.5	141.58	141.42	4.92455	4.92347	8389	485	3.92371
162-982C-15H-1-W 121	128.51	141.59	141.43	4.92472	4.92362	7523	456	3.87639
162-982C-15H-1-W 124	128.54	141.62	141.46	4.92522	4.92408	11181	628	4.04848
162-982C-15H-1-W 126	128.56	141.64	141.48	4.92555	4.92438	3576	733	4.14631
162-982C-15H-1-W 129	128.59	141.67	141.51	4.92606	4.92483	3576	176	3.5534
162-982C-15H-1-W 130	128.6	141.68	141.52	4.92622	4.92498	3576	176	3.5534
162-982C-15H-1-W 132	128.62	141.7	141.54	4.92656	4.92528	3576	176	3.5534
162-982C-15H-1-W 134	128.64	141.72	141.56	4.92689	4.92558	3576	176	3.5534
162-982C-15H-1-W 136	128.66	141.74	141.58	4.92723	4.92588	3576	176	3.5534
162-982C-15H-1-W 138	128.68	141.76	141.6	4.92756	4.92618	3576	176	3.5534
162-982C-15H-1-W 140	128.7	141.78	141.62	4.9279	4.92648	8382	321	3.92335
162-982C-15H-1-W 141	128.71	141.79	141.63	4.92807	4.92663	4590	199	3.66181
162-982C-15H-1-W 144	128.74	141.82	141.66	4.92857	4.92708	3057	104	3.4853
162-982C-15H-1-W 146	128.76	141.84	141.68	4.9289	4.92738	2640	58	3.4216
162-982C-15H-1-W 148	128.78	141.86	141.7	4.92924	4.92768	4613	319	3.66398
162-982C-15H-2-W 2	128.82	141.9	141.74	4.92991	4.92829	1924	40	3.28421
162-982C-15H-2-W 4	128.84	141.92	141.76	4.93024	4.92859	1308	83	3.11661
162-982C-15H-2-W 6	128.86	141.94	141.78	4.93058	4.92889	3501	239	3.54419
162-982C-15H-2-W 8	128.88	141.96	141.8	4.93091	4.92919	1583	75	3.19948
162-982C-15H-2-W 10	128.9	141.98	141.82	4.93125	4.92949	1335	92	3.12548
162-982C-15H-2-W 12	128.92	142	141.84	4.93158	4.92979	1086	-19	3.03583
162-982C-15H-2-W 13	128.93	142.01	141.85	4.93175	4.92994	1434	33	3.15655
162-982C-15H-2-W 16	128.96	142.04	141.88	4.93225	4.93039	1201	80	3.07954
162-982C-15H-2-W 18	128.98	142.06	141.9	4.93259	4.93069	1173	85	3.0693
162-982C-15H-2-W 19	128.99	142.07	141.91	4.93275	4.93084	1097	95	3.04021
162-982C-15H-2-W 22	129.02	142.1	141.94	4.93326	4.93129	1272	55	3.10449
162-982C-15H-2-W 23	129.03	142.11	141.95	4.93342	4.93144	1242	82	3.09412
162-982C-15H-2-W 26	129.06	142.14	141.98	4.93393	4.93189	1475	52	3.16879
162-982C-15H-2-W 28	129.08	142.16	142	4.93426	4.9322	1489	59	3.17289
162-982C-15H-2-W 29	129.09	142.17	142.01	4.93443	4.93235	1365	33	3.13513
162-982C-15H-2-W 32	129.12	142.2	142.04	4.93493	4.9328	1417	26	3.15137
162-982C-15H-2-W 34	129.14	142.22	142.06	4.93527	4.9331	1496	60	3.17493
162-982C-15H-2-W 37	129.17	142.25	142.09	4.93577	4.93355	1572	75	3.19645
162-982C-15H-2-W 38	129.18	142.26	142.1	4.93594	4.9337	1682	61	3.22583
162-982C-15H-2-W 40	129.2	142.28	142.12	4.93627	4.934	1605	99	3.20548
162-982C-15H-2-W 41	129.21	142.29	142.13	4.93644	4.93415	1708	93	3.23249
162-982C-15H-2-W 42	129.22	142.3	142.14	4.93661	4.9343	1635	103	3.21352
162-982C-15H-2-W 44	129.24	142.32	142.16	4.93694	4.9346	1654	32	3.21854
162-982C-15H-2-W 46	129.26	142.34	142.18	4.93727	4.9349	1824	70	3.26103
162-982C-15H-2-W 48	129.28	142.36	142.2	4.93761	4.9352	1571	79	3.19618
162-982C-15H-2-W 51	129.31	142.39	142.23	4.93811	4.93565	1622	19	3.21005
162-982C-15H-2-W 52	129.32	142.4	142.24	4.93828	4.9358	1611	70	3.2071
162-982C-15H-2-W 53	129.33	142.41	142.25	4.93845	4.93595	1583	85	3.19948
162-982C-15H-2-W 56	129.36	142.44	142.28	4.93895	4.93641	1692	50	3.2284
162-982C-15H-2-W 58	129.38	142.46	142.3	4.93928	4.93671	1676	81	3.22427
162-982C-15H-2-W 61	129.41	142.49	142.33	4.93979	4.93716	1564	75	3.19424
162-982C-15H-2-W 62	129.42	142.5	142.34	4.93995	4.93731	1729	117	3.23779
162-982C-15H-2-W 64	129.44	142.52	142.36	4.94029	4.93761	1586	66	3.2003
162-982C-15H-2-W 67	129.47	142.55	142.39	4.94079	4.93806	1522	-7	3.18241
162-982C-15H-2-W 68	129.48	142.56	142.4	4.94096	4.93821	1545	81	3.18893
162-982C-15H-2-W 69	129.49	142.57	142.41	4.94113	4.93836	1649	61	3.21722
162-982C-15H-2-W 72	129.52	142.6	142.44	4.94163	4.93881	1723	86	3.23629
162-982C-15H-2-W 74	129.54	142.62	142.46	4.94196	4.93911	1684	54	3.22634
162-982C-15H-2-W 75	129.55	142.63	142.47	4.94213	4.93926	1797	51	3.25455
162-982C-15H-2-W 78	129.58	142.66	142.5	4.94263	4.93971	1591	-10	3.20167
162-982C-15H-2-W 80	129.6	142.68	142.52	4.94297	4.94002	1685	96	3.2266
162-982C-15H-2-W 81	129.61	142.69	142.53	4.94314	4.94017	1589	57	3.20112
162-982C-15H-2-W 83.5	129.64	142.72	142.56	4.94364	4.94062	1723	55	3.23629
162-982C-15H-2-W 86	129.66	142.74	142.58	4.94397	4.94092	1927	107	3.28488
162-982C-15H-2-W 87	129.67	142.75	142.59	4.94414	4.94107	1784	84	3.25139
162-982C-15H-2-W 90	129.7	142.78	142.62	4.94464	4.94152	1833	82	3.26316
162-982C-15H-2-W 92	129.72	142.8	142.64	4.94498	4.94182	1924	85	3.28421
162-982C-15H-2-W 94	129.74	142.82	142.66	4.94531	4.94212	2140	45	3.33041
162-982C-15H-2-W 96	129.76	142.84	142.68	4.94565	4.94242	2264	54	3.35488
162-982C-15H-2-W 98	129.78	142.86	142.7	4.94598	4.94272	2338	30	3.36884
162-982C-15H-2-W 101	129.81	142.89	142.73	4.94648	4.94317	2173	58	3.33706
162-982C-15H-2-W 102	129.82	142.9	142.74	4.94665	4.94332	2392	77	3.37876
162-982C-15H-2-W 104	129.84	142.92	142.76	4.94699	4.94362	2424	75	3.38453
162-982C-15H-2-W 107	129.87	142.95	142.79	4.94749	4.94408	2461	98	3.39111
162-982C-15H-2-W 108	129.88	142.96	142.8	4.94766	4.94423	2654	51	3.4239
162-982C-15H-2-W 110	129.9	142.98	142.82	4.94799	4.94453	2674	93	3.42716
162-982C-15H-2-W 111	129.91	142.99	142.83	4.94816	4.94468	2748	99	3.43902
162-982C-15H-2-W 114	129.94	143.02	142.86	4.94866	4.94513	2877	81	3.45894
162-982C-15H-2-W 116	129.96	143.04	142.88	4.949	4.94543	3039	104	3.48273
162-982C-15H-2-W 118	129.98	143.06	142.9	4.94933	4.94573	3156	97	3.49914
162-982C-15H-2-W 120	130	143.08	142.92	4.94967	4.94603	2981	101	3.47436
162-982C-15H-2-W 122	130.02	143.1	142.94	4.95	4.94633	3044	78	3.48344
162-982C-15H-2-W 123	130.03	143.11	142.95	4.95017	4.94648	2992	75	3.47596
162-982C-15H-2-W 126	130.06	143.14	142.98	4.95067	4.94693	3007	71	3.47813
162-982C-15H-2-W 127	130.07	143.15	142.99	4.95084	4.94708	2978	59	3.47392
162-982C-15H-2-W 130	130.1	143.18	143.02	4.95134	4.94753	2286	42	3.35908
162-982C-15H-2-W 133	130.13	143.21	143.05	4.95184	4.94799	2746	69	3.4387
162-982C-15H-2-W 134	130.14	143.22	143.06	4.95201	4.94814	2599	82	3.41481
162-982C-15H-2-W 136	130.16	143.24	143.08	4.95234	4.94844	2466	76	3.39199
162-982C-15H-2-W 137	130.17	143.25	143.09	4.95251	4.94859	2513	74	3.40019
162-982C-15H-2-W 140	130.2	143.28	143.12	4.95301	4.94904	2380	31	3.37658
162-982C-15H-2-W 142	130.22	143.3	143.14	4.95335	4.94934	2576	104	3.41095
162-982C-15H-2-W 144	130.24	143.32	143.16	4.95368	4.94964	2525	111	3.40226
162-982C-15H-2-W 146	130.26	143.34	143.18	4.95402	4.94994	2335	135	3.36829
162-982C-15H-2-W 148	130.28	143.36	143.2	4.95435	4.95024	2281	63	3.35813
162-982C-15H-3-W 2	130.32	143.4	143.24	4.95502	4.95084	2089	41	3.31994
162-982C-15H-3-W 4	130.34	143.42	143.26	4.95536	4.95114	2237	67	3.34967
162-982C-15H-3-W 6	130.36	143.44	143.28	4.95569	4.95144	2219	93	3.34616
162-982C-15H-3-W 9	130.39	143.47	143.31	4.9562	4.95189	2155	61	3.33345
162-982C-15H-3-W 10	130.4	143.48	143.32	4.95636	4.95205	2136	75	3.3296
162-982C-15H-3-W 13	130.43	143.51	143.35	4.95687	4.9525	1904	43	3.27967
162-982C-15H-3-W 14	130.44	143.52	143.36	4.95703	4.95265	2077	83	3.31744
162-982C-15H-3-W 16	130.46	143.54	143.38	4.95737	4.95295	2004	119	3.3019
162-982C-15H-3-W 17	130.47	143.55	143.39	4.95754	4.9531	2037	123	3.30899
162-982C-15H-3-W 20	130.5	143.58	143.42	4.95804	4.95355	2165	89	3.33546
162-982C-15H-3-W 22	130.52	143.6	143.44	4.95837	4.95385	1887	95	3.27577
162-982C-15H-3-W 25	130.55	143.63	143.47	4.95888	4.95435	1635	83	3.21352
162-982B-15H-1-W 80	129.8	143.86	143.5	4.95938	4.95488	1596	55	3.20303
162-982B-15H-1-W 82	129.82	143.88	143.52	4.95971	4.95523	1707	115	3.23223
162-982B-15H-1-W 84	129.84	143.9	143.54	4.96005	4.95557	1541	78	3.1878
162-982B-15H-1-W 86	129.86	143.92	143.56	4.96038	4.95592	1559	31	3.19285
162-982B-15H-1-W 89	129.89	143.95	143.59	4.96088	4.95645	1645	116	3.21617
162-982B-15H-1-W 90	129.9	143.96	143.6	4.96105	4.95662	1537	86	3.18667
162-982B-15H-1-W 92	129.92	143.98	143.62	4.96139	4.95697	1758	90	3.24502
162-982B-15H-1-W 95	129.95	144.01	143.65	4.96189	4.9575	1635	79	3.21352
162-982B-15H-1-W 96	129.96	144.02	143.66	4.96206	4.95768	1662	25	3.22063
162-982B-15H-1-W 98	129.98	144.04	143.68	4.96239	4.95803	1701	44	3.2307
162-982B-15H-1-W 100	130	144.06	143.7	4.96273	4.95838	2031	61	3.30771
162-982B-15H-1-W 102	130.02	144.08	143.72	4.96306	4.95873	2019	75	3.30514
162-982B-15H-1-W 103	130.03	144.09	143.73	4.96323	4.9589	2145	105	3.33143
162-982B-15H-1-W 106	130.06	144.12	143.76	4.96373	4.95943	1910	95	3.28103
162-982B-15H-1-W 108	130.08	144.14	143.78	4.96407	4.95977	2342	139	3.36959
162-982B-15H-1-W 110	130.1	144.16	143.8	4.9644	4.96012	2356	100	3.37218
162-982B-15H-1-W 115	130.15	144.21	143.85	4.96524	4.961	2515	62	3.40054
162-982B-15H-1-W 116	130.16	144.22	143.86	4.96541	4.96117	2626	27	3.41929
162-982B-15H-1-W 118	130.18	144.24	143.88	4.96574	4.96152	2179	53	3.33826
162-982B-15H-1-W 120	130.2	144.26	143.9	4.96607	4.96188	2142	62	3.33082
162-982B-15H-1-W 121	130.21	144.27	143.91	4.96624	4.96205	2279	117	3.35774
162-982B-15H-1-W 122	130.22	144.28	143.92	4.96641	4.96223	2188	34	3.34005
162-982B-15H-1-W 125	130.25	144.31	143.95	4.96691	4.96275	1899	72	3.27852
162-982B-15H-1-W 126	130.26	144.32	143.96	4.96708	4.96293	1962	88	3.2927
162-982B-15H-1-W 129	130.29	144.35	143.99	4.96758	4.96345	1978	106	3.29623
162-982B-15H-1-W 130	130.3	144.36	144	4.96775	4.96363	1934	58	3.28646
162-982B-15H-1-W 132	130.32	144.38	144.02	4.96808	4.96397	2071	17	3.31618
162-982B-15H-1-W 134	130.34	144.4	144.04	4.96842	4.96432	1756	31	3.24452
162-982B-15H-1-W 137	130.37	144.43	144.07	4.96892	4.96485	1776	41	3.24944
162-982B-15H-1-W 138	130.38	144.44	144.08	4.96909	4.96502	1856	48	3.26858
162-982B-15H-1-W 140	130.4	144.46	144.1	4.96942	4.96537	1853	44	3.26788
162-982B-15H-1-W 142	130.42	144.48	144.12	4.96976	4.96572	1837	65	3.26411
162-982B-15H-1-W 143	130.43	144.49	144.13	4.96993	4.9659	1722	28	3.23603
162-982B-15H-1-W 146	130.46	144.52	144.16	4.97043	4.96642	1671	35	3.22298
162-982B-15H-1-W 148	130.48	144.54	144.18	4.97076	4.96677	1303	13	3.11494
162-982B-15H-1-W 149	130.49	144.55	144.19	4.97093	4.96695	1326	69	3.12254
162-982B-15H-2-W 6	130.56	144.62	144.26	4.9721	4.96817	1541	32	3.1878
162-982B-15H-2-W 7	130.57	144.63	144.27	4.97227	4.96835	1407	7	3.14829
162-982B-15H-2-W 9	130.59	144.65	144.29	4.97261	4.9687	1487	112	3.17231
162-982B-15H-2-W 10	130.6	144.66	144.3	4.97277	4.96887	1483	67	3.17114
162-982B-15H-2-W 13	130.63	144.69	144.33	4.97328	4.9694	1691	35	3.22814
162-982B-15H-2-W 14	130.64	144.7	144.34	4.97344	4.96957	1621	28	3.20978
162-982B-15H-2-W 16	130.66	144.72	144.36	4.97378	4.96992	1380	71	3.13988
162-982B-15H-2-W 18	130.68	144.74	144.38	4.97411	4.97027	1621	61	3.20978
162-982B-15H-2-W 20	130.7	144.76	144.4	4.97445	4.97062	1608	71	3.20629
162-982B-15H-2-W 22	130.72	144.78	144.42	4.97478	4.97097	1619	67	3.20925
162-982B-15H-2-W 24	130.74	144.8	144.44	4.97512	4.97132	1715	63	3.23426
162-982B-15H-2-W 25	130.75	144.81	144.45	4.97528	4.9715	1537	120	3.18667
162-982B-15H-2-W 27	130.77	144.83	144.47	4.97562	4.97185	1730	56	3.23805
162-982B-15H-2-W 28	130.78	144.84	144.48	4.97579	4.97202	1651	77	3.21775
162-982B-15H-2-W 29	130.79	144.85	144.49	4.97595	4.9722	1576	89	3.19756
162-982B-15H-2-W 31	130.81	144.87	144.51	4.97629	4.97255	1743	34	3.2413
162-982B-15H-2-W 34	130.84	144.9	144.54	4.97679	4.97307	1641	48	3.21511
162-982B-15H-2-W 37	130.87	144.93	144.57	4.97729	4.9736	1852	52	3.26764
162-982B-15H-2-W 39	130.89	144.95	144.59	4.97763	4.97395	1804	83	3.25624
162-982B-15H-2-W 45	130.95	145.01	144.65	4.97863	4.975	1773	40	3.24871
162-982B-15H-2-W 48	130.98	145.04	144.68	4.97914	4.97555	1847	-7	3.26647
162-982B-15H-2-W 50	131	145.06	144.7	4.97947	4.97592	1784	110	3.25139
162-982B-15H-2-W 51	131.01	145.07	144.71	4.97964	4.97611	1844	42	3.26576
162-982B-15H-2-W 54	131.04	145.1	144.74	4.98014	4.97666	2021	35	3.30557
162-982B-15H-2-W 55	131.05	145.11	144.75	4.98031	4.97685	1844	70	3.26576
162-982B-15H-2-W 58	131.08	145.14	144.78	4.98081	4.9774	1768	57	3.24748
162-982B-15H-2-W 61	131.11	145.17	144.81	4.98131	4.97795	1857	60	3.26881
162-982B-15H-2-W 62	131.12	145.18	144.82	4.98148	4.97814	1724	71	3.23654
162-982B-15H-2-W 63	131.13	145.19	144.83	4.98165	4.97832	1744	43	3.24155
162-982B-15H-2-W 66	131.16	145.22	144.86	4.98215	4.97888	1563	23	3.19396
162-982B-15H-2-W 69	131.19	145.25	144.89	4.98265	4.97943	1563	19	3.19396
162-982B-15H-2-W 70	131.2	145.26	144.9	4.98282	4.97962	1536	54	3.18639
162-982B-15H-2-W 72	131.22	145.28	144.92	4.98315	4.97998	1487	18	3.17231
162-982B-15H-2-W 74	131.24	145.3	144.94	4.98349	4.98035	1584	87	3.19976
162-982B-15H-2-W 76	131.26	145.32	144.96	4.98382	4.98072	1710	31	3.233
162-982B-15H-2-W 77	131.27	145.33	144.97	4.98399	4.98091	1525	52	3.18327
162-982B-15H-2-W 79.5	131.3	145.36	145	4.98449	4.98146	1441	122	3.15866
162-982B-15H-2-W 84	131.34	145.4	145.04	4.98516	4.9822	1450	87	3.16137
162-982B-15H-2-W 86	131.36	145.42	145.06	4.9855	4.98257	1573	106	3.19673
162-982B-15H-2-W 88	131.38	145.44	145.08	4.98583	4.98294	1410	30	3.14922
162-982B-15H-2-W 90	131.4	145.46	145.1	4.98617	4.98331	1589	71	3.20112
162-982B-15H-2-W 92	131.42	145.48	145.12	4.9865	4.98368	1490	51	3.17319
162-982B-15H-2-W 95	131.45	145.51	145.15	4.98701	4.98423	1645	69	3.21617
162-982B-15H-2-W 96	131.46	145.52	145.16	4.98717	4.98442	1631	6	3.21245
162-982B-15H-2-W 98	131.48	145.54	145.18	4.98751	4.98478	1441	91	3.15866
162-982B-15H-2-W 99	131.49	145.55	145.19	4.98768	4.98497	1421	59	3.15259
162-982B-15H-2-W 101	131.51	145.57	145.21	4.98801	4.98534	1480	65	3.17026
162-982B-15H-2-W 104	131.54	145.6	145.24	4.98851	4.98589	1388	49	3.14239
162-982B-15H-2-W 106	131.56	145.62	145.26	4.98885	4.98626	1419	65	3.15198
162-982B-15H-2-W 109	131.59	145.65	145.29	4.98935	4.98682	1567	80	3.19507
162-982B-15H-2-W 110	131.6	145.66	145.3	4.98952	4.987	1514	81	3.18013
162-982B-15H-2-W 112	131.62	145.68	145.32	4.98985	4.98737	1666	87	3.22167
162-982B-15H-2-W 114	131.64	145.7	145.34	4.99019	4.98774	1399	118	3.14582
162-982B-15H-2-W 117	131.67	145.73	145.37	4.99069	4.98829	1540	52	3.18752
162-982B-15H-2-W 118	131.68	145.74	145.38	4.99086	4.98848	1375	77	3.1383
162-982B-15H-2-W 119	131.69	145.75	145.39	4.99102	4.98866	1389	62	3.1427
162-982B-15H-2-W 124	131.74	145.8	145.44	4.99186	4.98958	1198	79	3.07846
162-982B-15H-2-W 126	131.76	145.82	145.46	4.9922	4.98995	1218	85	3.08565
162-982B-15H-2-W 128	131.78	145.84	145.48	4.99253	4.99032	1264	53	3.10175
162-982B-15H-2-W 130	131.8	145.86	145.5	4.99287	4.99069	1431	91	3.15564
162-982B-15H-2-W 131	131.81	145.87	145.51	4.99303	4.99088	1206	79	3.08135
162-982B-15H-2-W 132	131.82	145.88	145.52	4.9932	4.99106	1229	47	3.08955
162-982B-15H-2-W 135	131.85	145.91	145.55	4.9937	4.99162	1278	-3	3.10653
162-982B-15H-2-W 136	131.86	145.92	145.56	4.99387	4.9918	1344	62	3.1284
162-982B-15H-2-W 138	131.88	145.94	145.58	4.99421	4.99217	1316	64	3.11926
162-982B-15H-2-W 139	131.89	145.95	145.59	4.99437	4.99235	1451	49	3.16167
162-982B-15H-2-W 141	131.91	145.97	145.61	4.99471	4.99272	1352	23	3.13098
162-982B-15H-2-W 142	131.92	145.98	145.62	4.99488	4.99291	1308	34	3.11661
162-982B-15H-2-W 144	131.94	146	145.64	4.99521	4.99328	1291	60	3.11093
162-982B-15H-2-W 146	131.96	146.02	145.66	4.99555	4.99365	1246	61	3.09552
162-982B-15H-2-W 148	131.98	146.04	145.68	4.99588	4.99402	1259	84	3.10003
162-982B-15H-2-W 150	132	146.06	145.7	4.99622	4.99438	1308	54	3.11661
162-982B-15H-3-W 2	132.02	146.08	145.72	4.99655	4.99475	1443	42	3.15927
162-982B-15H-3-W 5	132.05	146.11	145.75	4.99705	4.99531	1338	111	3.12646
162-982B-15H-3-W 6	132.06	146.12	145.76	4.99722	4.99549	1360	55	3.13354
162-982B-15H-3-W 7	132.07	146.13	145.77	4.99739	4.99568	1122	81	3.04999
162-982B-15H-3-W 13	132.13	146.19	145.83	4.99839	4.99678	1402	54	3.14675
162-982B-15H-3-W 15	132.15	146.21	145.85	4.99873	4.99715	1268	68	3.10312
162-982B-15H-3-W 16	132.16	146.22	145.86	4.99889	4.99734	1446	82	3.16017
162-982B-15H-3-W 18	132.18	146.24	145.88	4.99923	4.99771	1266	116	3.10243
162-982B-15H-3-W 21	132.21	146.27	145.91	4.99973	4.99826	1520	65	3.18184
162-982B-15H-3-W 22	132.22	146.28	145.92	4.9999	4.99845	1424	64	3.15351
162-982B-15H-3-W 23	132.23	146.29	145.93	5.00007	4.99863	1301	65	3.11428
162-982B-15H-3-W 26	132.26	146.32	145.96	5.00057	4.99914	1535	67	3.18611
162-982B-15H-3-W 29	132.29	146.35	145.99	5.00107	4.99955	1192	28	3.07628
162-982B-15H-3-W 30	132.3	146.36	146	5.00124	4.99969	1460	72	3.16435
162-982B-15H-3-W 32	132.32	146.38	146.02	5.00157	4.99996	1567	82	3.19507
162-982B-15H-3-W 33	132.33	146.39	146.03	5.00174	5.0001	1478	51	3.16967
162-982B-15H-3-W 35.5	132.36	146.42	146.06	5.00224	5.00051	1513	59	3.17984
162-982B-15H-3-W 39	132.39	146.45	146.09	5.00275	5.00092	1531	42	3.18498
162-982B-15H-3-W 40	132.4	146.46	146.1	5.00291	5.00106	1482	56	3.17085
162-982B-15H-3-W 42	132.42	146.48	146.12	5.00325	5.00133	1557	52	3.19229
162-982B-15H-3-W 44.5	132.45	146.51	146.15	5.00375	5.00174	1430	51	3.15534
162-982B-15H-3-W 46.5	132.47	146.53	146.17	5.00409	5.00201	1548	75	3.18977
162-982B-15H-3-W 48	132.48	146.54	146.18	5.00425	5.00215	1444	98	3.15957
162-982B-15H-3-W 49	132.49	146.55	146.19	5.00442	5.00229	1641	101	3.21511
162-982B-15H-3-W 55	132.55	146.61	146.25	5.00542	5.00311	1714	90	3.23401
162-982B-15H-3-W 56	132.56	146.62	146.26	5.00559	5.00325	1663	56	3.22089
162-982B-15H-3-W 58	132.58	146.64	146.28	5.00593	5.00352	1633	77	3.21299
162-982B-15H-3-W 61	132.61	146.67	146.31	5.00643	5.00393	1675	150	3.22401
162-982B-15H-3-W 62	132.62	146.68	146.32	5.0066	5.00407	1699	106	3.23019
162-982B-15H-3-W 65	132.65	146.71	146.35	5.0071	5.00448	1830	43	3.26245
162-982B-15H-3-W 66	132.66	146.72	146.36	5.00727	5.00462	1808	104	3.2572
162-982B-15H-3-W 67	132.67	146.73	146.37	5.00743	5.00476	1866	91	3.27091
162-982B-15H-3-W 72	132.72	146.78	146.42	5.00827	5.00544	1570	98	3.1959
162-982B-15H-3-W 74	132.74	146.8	146.44	5.00861	5.00571	1514	51	3.18013
162-982B-15H-3-W 77	132.77	146.83	146.47	5.00911	5.00613	1625	49	3.21085
162-982B-15H-3-W 78	132.78	146.84	146.48	5.00928	5.00626	1681	122	3.22557
162-982B-15H-3-W 79	132.79	146.85	146.49	5.00944	5.0064	1664	56	3.22115
162-982B-15H-3-W 82	132.82	146.88	146.52	5.00995	5.00681	1725	86	3.23679
162-982B-15H-3-W 83	132.83	146.89	146.53	5.01011	5.00695	1634	61	3.21325
162-982B-15H-3-W 86	132.86	146.92	146.56	5.01062	5.00736	1641	87	3.21511
162-982B-15H-3-W 87	132.87	146.93	146.57	5.01078	5.0075	1672	87	3.22324
162-982B-15H-3-W 89	132.89	146.95	146.59	5.01112	5.00777	1727	65	3.23729
162-982B-15H-3-W 94	132.94	147	146.64	5.01196	5.00846	1841	117	3.26505
162-982B-15H-3-W 97	132.97	147.03	146.67	5.01246	5.00887	1584	109	3.19976
162-982B-15H-3-W 98	132.98	147.04	146.68	5.01262	5.009	1955	50	3.29115
162-982B-15H-3-W 100	133	147.06	146.7	5.01296	5.00928	1985	122	3.29776
162-982B-15H-3-W 102	133.02	147.08	146.72	5.01329	5.00955	2247	117	3.3516
162-982B-15H-3-W 103	133.03	147.09	146.73	5.01346	5.00969	2162	96	3.33486
162-982B-15H-3-W 106	133.06	147.12	146.76	5.01396	5.0101	2819	140	3.4501
162-982B-15H-3-W 109	133.09	147.15	146.79	5.01447	5.01051	3411	161	3.53288
162-982B-15H-3-W 110	133.1	147.16	146.8	5.01463	5.01065	3501	138	3.54419
162-982B-15H-3-W 112	133.12	147.18	146.82	5.01497	5.01092	4120	234	3.6149
162-982B-15H-3-W 114	133.14	147.2	146.84	5.0153	5.0112	4590	158	3.66181
162-982B-15H-3-W 117	133.17	147.23	146.87	5.01581	5.01161	5679	286	3.75427
162-982B-15H-3-W 118	133.18	147.24	146.88	5.01597	5.01174	5802	259	3.76358
162-982B-15H-3-W 119	133.19	147.25	146.89	5.01614	5.01188	5048	273	3.70312
162-982B-15H-3-W 122	133.22	147.28	146.92	5.01664	5.01229	6872	96	3.83708
162-982B-15H-3-W 123	133.23	147.29	146.93	5.01681	5.01243	2186	98	3.33965
162-982B-15H-3-W 124	133.24	147.3	146.94	5.01698	5.01257	2199	96	3.34223
162-982B-15H-3-W 126	133.26	147.32	146.96	5.01731	5.01284	2199	99	3.34223
162-982B-15H-3-W 127	133.27	147.33	146.97	5.01748	5.01298	2199	99	3.34223
162-982B-15H-3-W 128	133.28	147.34	146.98	5.01765	5.01311	2199	96	3.34223
162-982B-15H-3-W 129	133.29	147.35	146.99	5.01782	5.01325	2199	96	3.34223
162-982B-15H-3-W 134	133.34	147.4	147.04	5.01865	5.01394	2771	76	3.44264
162-982B-15H-3-W 135	133.35	147.41	147.05	5.01882	5.01407	2310	108	3.36361
162-982B-15H-3-W 138	133.38	147.44	147.08	5.01932	5.01449	2357	76	3.37236
162-982B-15H-3-W 139	133.39	147.45	147.09	5.01949	5.01462	2252	-20	3.35257
162-982B-15H-3-W 142	133.42	147.48	147.12	5.01999	5.01503	2146	71	3.33163
162-982B-15H-3-W 144	133.44	147.5	147.14	5.02033	5.01531	2026	79	3.30664
162-982B-15H-3-W 146	133.46	147.52	147.16	5.02066	5.01558	2104	41	3.32305
162-982B-15H-3-W 148	133.48	147.54	147.18	5.021	5.01586	2021	86	3.30557
162-982B-15H-4-W 2	133.52	147.58	147.22	5.02167	5.0164	2373	106	3.3753
162-982B-15H-4-W 4	133.54	147.6	147.24	5.022	5.01668	2186	76	3.33965
162-982B-15H-4-W 7	133.57	147.63	147.27	5.0225	5.01709	2199	76	3.34223
162-982B-15H-4-W 8	133.58	147.64	147.28	5.02267	5.01723	2082	78	3.31848
162-982B-15H-4-W 10	133.6	147.66	147.3	5.02301	5.0175	2089	86	3.31994
162-982B-15H-4-W 12	133.62	147.68	147.32	5.02334	5.01777	1944	48	3.2887
162-982B-15H-4-W 13	133.63	147.69	147.33	5.02351	5.01791	2168	39	3.33606
162-982B-15H-4-W 15	133.65	147.71	147.35	5.02384	5.01819	2415	105	3.38292
162-982B-15H-4-W 18	133.68	147.74	147.38	5.02435	5.0186	2516	67	3.40071
162-982B-15H-4-W 27	133.77	147.83	147.47	5.02585	5.01983	2229	100	3.34811
162-982B-15H-4-W 28	133.78	147.84	147.48	5.02602	5.01997	2139	60	3.33021
162-982B-15H-4-W 30	133.8	147.86	147.5	5.02636	5.02024	2155	99	3.33345
162-982B-15H-4-W 32	133.82	147.88	147.52	5.02669	5.02051	2209	71	3.3442
162-982B-15H-4-W 33	133.83	147.89	147.53	5.02686	5.02065	2122	101	3.32675
162-982B-15H-4-W 35.5	133.86	147.92	147.56	5.02736	5.02106	1817	63	3.25935
162-982B-15H-4-W 39	133.89	147.95	147.59	5.02786	5.02147	1920	10	3.2833
162-982B-15H-4-W 40	133.9	147.96	147.6	5.02803	5.02161	1717	77	3.23477
162-982B-15H-4-W 41	133.91	147.97	147.61	5.0282	5.02175	1589	65	3.20112
162-982B-15H-4-W 44	133.94	148	147.64	5.0287	5.02216	1406	73	3.14799
162-982B-15H-4-W 45	133.95	148.01	147.65	5.02887	5.0223	1469	65	3.16702
162-982B-15H-4-W 48	133.98	148.04	147.68	5.02937	5.02271	1699	92	3.23019
162-982B-15H-4-W 50	134	148.06	147.7	5.0297	5.02298	1621	68	3.20978
162-982B-15H-4-W 52	134.02	148.08	147.72	5.03004	5.02326	1444	38	3.15957
162-982B-15H-4-W 55	134.05	148.11	147.75	5.03054	5.02367	1458	52	3.16376
162-982B-15H-4-W 58	134.08	148.14	147.78	5.03104	5.02408	1571	74	3.19618
162-982B-15H-4-W 63	134.13	148.19	147.83	5.03188	5.02476	1570	43	3.1959
162-982B-15H-4-W 65	134.15	148.21	147.85	5.03222	5.02504	1498	54	3.17551
162-982B-15H-4-W 68	134.18	148.24	147.88	5.03272	5.02545	1665	71	3.22141
162-982B-15H-4-W 70	134.2	148.26	147.9	5.03305	5.02572	1688	79	3.22737
162-982B-15H-4-W 72	134.22	148.28	147.92	5.03339	5.026	1396	104	3.14489
162-982B-15H-4-W 75	134.25	148.31	147.95	5.03389	5.02641	1534	118	3.18583
162-982B-15H-4-W 77	134.27	148.33	147.97	5.03423	5.02668	1535	72	3.18611
162-982B-15H-4-W 79	134.29	148.35	147.99	5.03456	5.02696	1528	51	3.18412
162-982B-15H-4-W 80	134.3	148.36	148	5.03473	5.02709	1528	68	3.18412
162-982B-15H-4-W 81	134.31	148.37	148.01	5.03489	5.02723	1721	81	3.23578
162-982B-15H-4-W 84	134.34	148.4	148.04	5.0354	5.02764	1646	45	3.21643
162-982B-15H-4-W 85	134.35	148.41	148.05	5.03556	5.02778	1533	115	3.18554
162-982B-15H-4-W 88	134.38	148.44	148.08	5.03607	5.02819	1620	49	3.20952
162-982B-15H-4-W 90	134.4	148.46	148.1	5.0364	5.02846	1856	97	3.26858
162-982B-15H-4-W 92	134.42	148.48	148.12	5.03674	5.02874	1602	88	3.20466
162-982B-15H-4-W 93	134.43	148.49	148.13	5.0369	5.02887	1370	81	3.13672
162-982B-15H-4-W 96	134.46	148.52	148.16	5.03741	5.02929	1541	88	3.1878
162-982B-15H-4-W 97	134.47	148.53	148.17	5.03757	5.02942	1766	50	3.24699
162-982B-15H-4-W 104	134.54	148.6	148.24	5.03875	5.03038	1440	69	3.15836
162-982B-15H-4-W 105	134.55	148.61	148.25	5.03891	5.03052	1455	80	3.16286
162-982B-15H-4-W 108	134.58	148.64	148.28	5.03942	5.03093	1594	61	3.20249
162-982B-15H-4-W 110	134.6	148.66	148.3	5.03975	5.0312	1474	63	3.1685
162-982B-15H-4-W 111	134.61	148.67	148.31	5.03992	5.03134	1379	39	3.13956
162-982B-15H-4-W 115	134.65	148.71	148.35	5.04059	5.03189	1631	113	3.21245
162-982B-15H-4-W 116	134.66	148.72	148.36	5.04076	5.03203	1705	99	3.23172
162-982B-15H-4-W 118	134.68	148.74	148.38	5.04109	5.0323	1470	55	3.16732
162-982B-15H-4-W 120	134.7	148.76	148.4	5.04143	5.03257	1380	75	3.13988
162-982B-15H-4-W 123	134.73	148.79	148.43	5.04193	5.03299	1550	80	3.19033
162-982B-15H-4-W 124	134.74	148.8	148.44	5.0421	5.03312	1421	104	3.15259
162-982B-15H-4-W 127	134.77	148.83	148.47	5.0426	5.03353	1492	83	3.17377
162-982B-15H-4-W 128	134.78	148.84	148.48	5.04276	5.03367	1472	73	3.16791
162-982B-15H-4-W 130	134.8	148.86	148.5	5.0431	5.03394	1430	84	3.15534
162-982B-15H-4-W 132	134.82	148.88	148.52	5.04343	5.03422	1393	54	3.14395
162-982B-15H-4-W 133	134.83	148.89	148.53	5.0436	5.03436	1560	40	3.19312
162-982B-15H-4-W 136	134.86	148.92	148.56	5.0441	5.03477	1624	79	3.21059
162-982B-15H-4-W 138	134.88	148.94	148.58	5.04444	5.03504	1416	53	3.15106
162-982B-15H-4-W 143	134.93	148.99	148.63	5.04528	5.03573	1482	34	3.17085
162-982B-15H-4-W 144	134.94	149	148.64	5.04544	5.03586	1542	33	3.18808
162-982B-15H-4-W 146	134.96	149.02	148.66	5.04578	5.03613	1600	44	3.20412
162-982B-15H-4-W 148	134.98	149.04	148.68	5.04611	5.03639	1655	49	3.2188
162-982B-15H-4-W 149	134.99	149.05	148.69	5.04628	5.03652	1456	73	3.16316
162-982B-15H-5-W 2	135.02	149.08	148.72	5.04678	5.03691	1631	42	3.21245
162-982B-15H-5-W 3	135.03	149.09	148.73	5.04695	5.03704	1678	61	3.22479
162-982B-15H-5-W 9	135.09	149.15	148.79	5.04796	5.03782	1515	30	3.18041
162-982B-15H-5-W 10	135.1	149.16	148.8	5.04812	5.03795	1550	36	3.19033
162-982B-15H-5-W 13	135.13	149.19	148.83	5.04863	5.03834	1685	91	3.2266
162-982B-15H-5-W 14	135.14	149.2	148.84	5.04879	5.03847	1339	74	3.12678
162-982B-15H-5-W 19	135.19	149.25	148.89	5.04963	5.03911	1736	38	3.23955
162-982B-15H-5-W 20	135.2	149.26	148.9	5.0498	5.03924	1818	66	3.25959
162-982B-15H-5-W 21	135.21	149.27	148.91	5.04996	5.03937	1647	61	3.21669
162-982B-15H-5-W 24	135.24	149.3	148.94	5.05047	5.03976	1358	19	3.1329
162-982B-15H-5-W 28	135.28	149.34	148.98	5.05114	5.04028	1183	70	3.07298
162-982B-15H-5-W 31	135.31	149.37	149.01	5.05164	5.04067	1318	27	3.11992
162-982B-15H-5-W 33	135.33	149.39	149.03	5.05197	5.04093	1523	70	3.1827
162-982B-15H-5-W 37	135.37	149.43	149.07	5.05264	5.04145	1647	43	3.21669
162-982B-15H-5-W 38	135.38	149.44	149.08	5.05281	5.04158	1677	65	3.22453
162-982B-15H-5-W 39	135.39	149.45	149.09	5.05298	5.04171	1729	34	3.23779
162-982B-15H-5-W 42	135.42	149.48	149.12	5.05348	5.0421	1693	95	3.22866
162-982B-15H-5-W 47	135.47	149.53	149.17	5.05432	5.04275	1836	102	3.26387
162-982B-15H-5-W 48	135.48	149.54	149.18	5.05449	5.04288	1474	78	3.1685
162-982B-15H-5-W 49	135.49	149.55	149.19	5.05465	5.04301	1630	101	3.21219
162-982B-15H-5-W 52	135.52	149.58	149.22	5.05516	5.0434	1648	108	3.21696
162-982B-15H-5-W 53	135.53	149.59	149.23	5.05532	5.04353	1649	56	3.21722
162-982B-15H-5-W 56	135.56	149.62	149.26	5.05583	5.04392	1682	124	3.22583
162-982B-15H-5-W 58	135.58	149.64	149.28	5.05616	5.04418	1776	100	3.24944
162-982B-15H-5-W 61	135.61	149.67	149.31	5.05666	5.04457	1624	47	3.21059
162-982B-15H-5-W 62	135.62	149.68	149.32	5.05683	5.0447	1785	37	3.25164
162-982B-15H-5-W 65	135.65	149.71	149.35	5.05733	5.04509	1933	77	3.28623
162-982B-15H-5-W 66	135.66	149.72	149.36	5.0575	5.04522	1812	59	3.25816
162-982B-15H-5-W 68	135.68	149.74	149.38	5.05784	5.04547	1837	71	3.26411
162-982B-15H-5-W 69	135.69	149.75	149.39	5.058	5.0456	1756	30	3.24452
162-982B-15H-5-W 70	135.7	149.76	149.4	5.05817	5.04573	1702	40	3.23096
162-982B-15H-5-W 73	135.73	149.79	149.43	5.05867	5.04612	1733	98	3.2388
162-982B-15H-5-W 74	135.74	149.8	149.44	5.05884	5.04625	2027	53	3.30685
162-982B-15H-5-W 77	135.77	149.83	149.47	5.05934	5.04664	2009	65	3.30298
162-982B-15H-5-W 78	135.78	149.84	149.48	5.05951	5.04677	1871	98	3.27207
162-982B-15H-5-W 80	135.8	149.86	149.5	5.05984	5.04703	1769	79	3.24773
162-982B-15H-5-W 82	135.82	149.88	149.52	5.06018	5.04729	2111	72	3.32449
162-982B-15H-5-W 84	135.84	149.9	149.54	5.06051	5.04755	1749	55	3.24279
162-982B-15H-5-W 85	135.85	149.91	149.55	5.06068	5.04768	1684	66	3.22634
162-982B-15H-5-W 87.5	135.88	149.94	149.58	5.06118	5.04807	2253	65	3.35276
162-982B-15H-5-W 90	135.9	149.96	149.6	5.06152	5.04833	2098	53	3.32181
162-982B-15H-5-W 92	135.92	149.98	149.62	5.06185	5.04859	1916	66	3.2824
162-982B-15H-5-W 95	135.95	150.01	149.65	5.06236	5.04898	1847	62	3.26647
162-982B-15H-5-W 96	135.96	150.02	149.66	5.06252	5.04911	1729	51	3.23779
162-982B-15H-5-W 98	135.98	150.04	149.68	5.06286	5.04937	1708	54	3.23249
162-982B-15H-5-W 99	135.99	150.05	149.69	5.06303	5.0495	1762	3	3.24601
162-982B-15H-5-W 102	136.02	150.08	149.72	5.06353	5.04989	1606	60	3.20575
162-982B-15H-5-W 103	136.03	150.09	149.73	5.0637	5.05002	1558	39	3.19257
162-982B-15H-5-W 105.5	136.06	150.12	149.76	5.0642	5.05041	1615	87	3.20817
162-982B-15H-5-W 108	136.08	150.14	149.78	5.06453	5.05067	1443	90	3.15927
162-982B-15H-5-W 109	136.09	150.15	149.79	5.0647	5.0508	1697	62	3.22968
162-982B-15H-5-W 112	136.12	150.18	149.82	5.0652	5.05119	1618	-7	3.20898
162-982B-15H-5-W 115	136.15	150.21	149.85	5.0657	5.05158	1544	69	3.18865
162-982B-15H-5-W 118	136.18	150.24	149.88	5.06621	5.05196	1797	69	3.25455
162-982B-15H-5-W 120	136.2	150.26	149.9	5.06654	5.05222	1732	84	3.23855
162-982B-15H-5-W 121	136.21	150.27	149.91	5.06671	5.05235	1725	30	3.23679
162-982B-15H-5-W 124	136.24	150.3	149.94	5.06721	5.05274	1964	103	3.29314
162-982B-15H-5-W 125	136.25	150.31	149.95	5.06738	5.05287	1977	50	3.29601
162-982B-15H-5-W 128	136.28	150.34	149.98	5.06788	5.05326	2062	73	3.31429
162-982B-15H-5-W 129	136.29	150.35	149.99	5.06805	5.05339	1825	102	3.26126
162-982B-15H-5-W 132	136.32	150.38	150.02	5.06855	5.05378	2074	90	3.31681
162-982B-15H-5-W 133	136.33	150.39	150.03	5.06872	5.05391	2099	111	3.32201
162-982B-15H-5-W 135.5	136.36	150.42	150.06	5.06922	5.0543	1884	39	3.27508
162-982B-15H-5-W 137	136.37	150.43	150.07	5.06939	5.05443	2177	56	3.33786
162-982B-15H-5-W 139	136.39	150.45	150.09	5.06972	5.05469	2257	90	3.35353
162-982B-15H-5-W 140	136.4	150.46	150.1	5.06989	5.05482	2442	48	3.38775
162-982B-15H-5-W 143	136.43	150.49	150.13	5.07039	5.05521	2631	26	3.42012
162-982B-15H-5-W 144	136.44	150.5	150.14	5.07056	5.05534	2638	32	3.42127
162-982B-15H-5-W 146	136.46	150.52	150.16	5.0709	5.0556	2651	71	3.42341
162-982B-15H-5-W 148	136.48	150.54	150.18	5.07123	5.05586	2491	97	3.39637
162-982B-15H-6-W 2	136.52	150.58	150.22	5.0719	5.05638	2681	71	3.4283
162-982B-15H-6-W 3	136.53	150.59	150.23	5.07207	5.05651	2745	28	3.43854
162-982B-15H-6-W 7	136.57	150.63	150.27	5.07274	5.05703	1975	74	3.29557
162-982B-15H-6-W 10	136.6	150.66	150.3	5.07324	5.05742	3099	70	3.49122
162-982B-15H-6-W 11	136.61	150.67	150.31	5.07341	5.05755	3230	67	3.5092
162-982B-15H-6-W 13.5	136.64	150.7	150.34	5.07391	5.05794	3235	28	3.50987
162-982B-15H-6-W 19	136.69	150.75	150.39	5.07475	5.05858	2962	72	3.47159
162-982B-15H-6-W 22	136.72	150.78	150.42	5.07525	5.05897	3411	103	3.53288
162-982B-15H-6-W 23	136.73	150.79	150.43	5.07542	5.0591	3681	93	3.56597
162-982B-15H-6-W 29	136.79	150.85	150.49	5.07642	5.05988	3862	83	3.58681
162-982B-15H-6-W 30	136.8	150.86	150.5	5.07659	5.06001	4233	153	3.62665
162-982B-15H-6-W 31	136.81	150.87	150.51	5.07676	5.06014	3613	57	3.55787
162-982B-15H-6-W 33	136.83	150.89	150.53	5.07709	5.0604	3745	65	3.57345
162-982B-15H-6-W 38	136.88	150.94	150.58	5.07793	5.06105	3644	81	3.56158
162-982B-15H-6-W 41	136.91	150.97	150.61	5.07843	5.06144	4151	4	3.61815
162-982B-15H-6-W 42	136.92	150.98	150.62	5.0786	5.06157	3835	50	3.58377
162-982B-15H-6-W 43	136.93	150.99	150.63	5.07877	5.0617	3763	76	3.57553
162-982B-15H-6-W 48	136.98	151.04	150.68	5.0796	5.06235	2820	18	3.45025
162-982A-15H-2-W 52	133.72	151	150.71	5.08011	5.06274	2196	39	3.34163
162-982A-15H-2-W 54	133.74	151.02	150.73	5.08044	5.063	2330	71	3.36736
162-982A-15H-2-W 55	133.75	151.03	150.74	5.08061	5.06313	2554	116	3.40722
162-982A-15H-2-W 58	133.78	151.06	150.77	5.08111	5.06352	1766	60	3.24699
162-982A-15H-2-W 60	133.8	151.08	150.79	5.08144	5.06378	1842	79	3.26529
162-982A-15H-2-W 63	133.83	151.11	150.82	5.08195	5.06417	1725	107	3.23679
162-982A-15H-2-W 64	133.84	151.12	150.83	5.08211	5.06429	1655	56	3.2188
162-982A-15H-2-W 66	133.86	151.14	150.85	5.08245	5.06455	1609	115	3.20656
162-982A-15H-2-W 67	133.87	151.15	150.86	5.08262	5.06468	1664	30	3.22115
162-982A-15H-2-W 68	133.88	151.16	150.87	5.08278	5.06481	1628	26	3.21165
162-982A-15H-2-W 70	133.9	151.18	150.89	5.08312	5.06507	1656	9	3.21906
162-982A-15H-2-W 72	133.92	151.2	150.91	5.08345	5.06533	1733	51	3.2388
162-982A-15H-2-W 75	133.95	151.23	150.94	5.08396	5.06572	1745	56	3.2418
162-982A-15H-2-W 76	133.96	151.24	150.95	5.08412	5.06585	1856	60	3.26858
162-982A-15H-2-W 78	133.98	151.26	150.97	5.08446	5.06611	1651	72	3.21775
162-982A-15H-2-W 80	134	151.28	150.99	5.08479	5.06637	1776	23	3.24944
162-982A-15H-2-W 82	134.02	151.3	151.01	5.08513	5.06663	1841	63	3.26505
162-982A-15H-2-W 83	134.03	151.31	151.02	5.0853	5.06676	1649	93	3.21722
162-982A-15H-2-W 86	134.06	151.34	151.05	5.0858	5.06715	1781	58	3.25066
162-982A-15H-2-W 87	134.07	151.35	151.06	5.08597	5.06728	1986	88	3.29798
162-982A-15H-2-W 90	134.1	151.38	151.09	5.08647	5.06767	2189	112	3.34025
162-982A-15H-2-W 91	134.11	151.39	151.1	5.08664	5.0678	1980	107	3.29667
162-982A-15H-2-W 95	134.15	151.43	151.14	5.08731	5.06832	2211	65	3.34459
162-982A-15H-2-W 96	134.16	151.44	151.15	5.08747	5.06845	2281	110	3.35813
162-982A-15H-2-W 98	134.18	151.46	151.17	5.08781	5.06871	2168	108	3.33606
162-982A-15H-2-W 101	134.21	151.49	151.2	5.08831	5.0691	2779	130	3.44389
162-982A-15H-2-W 102	134.22	151.5	151.21	5.08848	5.06923	2878	79	3.45909
162-982A-15H-2-W 104	134.24	151.52	151.23	5.08881	5.06949	3357	34	3.52595
162-982A-15H-2-W 105	134.25	151.53	151.24	5.08898	5.06962	3210	166	3.50651
162-982A-15H-2-W 108	134.28	151.56	151.27	5.08948	5.07001	3298	98	3.51825
162-982A-15H-2-W 109	134.29	151.57	151.28	5.08965	5.07014	3498	107	3.54382
162-982A-15H-2-W 112	134.32	151.6	151.31	5.09015	5.07053	3473	158	3.5407
162-982A-15H-2-W 114	134.34	151.62	151.33	5.09049	5.07078	4433	162	3.6467
162-982A-15H-2-W 115	134.35	151.63	151.34	5.09065	5.07091	4666	180	3.66894
162-982A-15H-2-W 116	134.36	151.64	151.35	5.09082	5.07104	5051	152	3.70338
162-982A-15H-2-W 119	134.39	151.67	151.38	5.09132	5.07143	4533	212	3.65639
162-982A-15H-2-W 120	134.4	151.68	151.39	5.09149	5.07156	1733	72	3.2388
162-982A-15H-2-W 121	134.41	151.69	151.4	5.09166	5.07169	4160	170	3.61909
162-982A-15H-2-W 124	134.44	151.72	151.43	5.09216	5.07208	2218	86	3.34596
162-982A-15H-2-W 126	134.46	151.74	151.45	5.0925	5.07234	1728	90	3.23754
162-982A-15H-2-W 127	134.47	151.75	151.46	5.09266	5.07247	1627	56	3.21139
162-982A-15H-2-W 131	134.51	151.79	151.5	5.09333	5.07299	1617	44	3.20871
162-982A-15H-2-W 132	134.52	151.8	151.51	5.0935	5.07312	1696	65	3.22943
162-982A-15H-2-W 134	134.54	151.82	151.53	5.09384	5.07338	1706	71	3.23198
162-982A-15H-2-W 135	134.55	151.83	151.54	5.094	5.07351	1525	103	3.18327
162-982A-15H-2-W 139	134.59	151.87	151.58	5.09467	5.07403	1344	80	3.1284
162-982A-15H-2-W 140	134.6	151.88	151.59	5.09484	5.07416	1465	60	3.16584
162-982A-15H-2-W 142	134.62	151.9	151.61	5.09518	5.07442	1344	46	3.1284
162-982A-15H-2-W 144	134.64	151.92	151.63	5.09551	5.07468	1266	118	3.10243
162-982A-15H-2-W 146	134.66	151.94	151.65	5.09584	5.07494	1364	38	3.13481
162-982A-15H-2-W 148	134.68	151.96	151.67	5.09618	5.0752	1492	60	3.17377
162-982A-15H-2-W 150	134.7	151.98	151.69	5.09651	5.07546	1670	50	3.22272
162-982A-15H-2-W 151	134.71	151.99	151.7	5.09668	5.07559	1569	64	3.19562
162-982A-15H-3-W 2	134.72	152	151.71	5.09685	5.07572	1563	79	3.19396
162-982A-15H-3-W 4	134.74	152.02	151.73	5.09718	5.07598	1611	65	3.2071
162-982A-15H-3-W 6	134.76	152.04	151.75	5.09752	5.07624	1672	47	3.22324
162-982A-15H-3-W 8	134.78	152.06	151.77	5.09785	5.0765	1559	80	3.19285
162-982A-15H-3-W 10	134.8	152.08	151.79	5.09819	5.07676	1539	56	3.18724
162-982A-15H-3-W 11	134.81	152.09	151.8	5.09836	5.07689	1560	45	3.19312
162-982A-15H-3-W 14	134.84	152.12	151.83	5.09886	5.07727	1619	63	3.20925
162-982A-15H-3-W 16	134.86	152.14	151.85	5.09919	5.07753	1625	61	3.21085
162-982A-15H-3-W 19	134.89	152.17	151.88	5.0997	5.07792	1655	4	3.2188
162-982A-15H-3-W 22	134.92	152.2	151.91	5.1002	5.07831	1496	39	3.17493
162-982A-15H-3-W 24	134.94	152.22	151.93	5.10053	5.07857	1666	87	3.22167
162-982A-15H-3-W 26	134.96	152.24	151.95	5.10087	5.07883	1716	74	3.23452
162-982A-15H-3-W 29	134.99	152.27	151.98	5.10137	5.07922	1745	43	3.2418
162-982A-15H-3-W 30	135	152.28	151.99	5.10154	5.07935	1804	27	3.25624
162-982A-15H-3-W 32	135.02	152.3	152.01	5.10187	5.07961	1830	45	3.26245
162-982A-15H-3-W 35	135.05	152.33	152.04	5.10238	5.08	1456	35	3.16316
162-982A-15H-3-W 36	135.06	152.34	152.05	5.10254	5.08021	1695	49	3.22917
162-982A-15H-3-W 39	135.09	152.37	152.08	5.10304	5.08084	1777	101	3.24969
162-982A-15H-3-W 40	135.1	152.38	152.09	5.10321	5.08106	1912	53	3.28149
162-982A-15H-3-W 42	135.12	152.4	152.11	5.10355	5.08148	1815	-12	3.25888
162-982A-15H-3-W 45	135.15	152.43	152.14	5.10405	5.08211	1669	84	3.22246
162-982A-15H-3-W 46	135.16	152.44	152.15	5.10422	5.08232	1659	90	3.21985
162-982A-15H-3-W 49	135.19	152.47	152.18	5.10472	5.08296	1807	97	3.25696
162-982A-15H-3-W 50	135.2	152.48	152.19	5.10489	5.08317	1788	98	3.25237
162-982A-15H-3-W 52	135.22	152.5	152.21	5.10522	5.08359	1883	55	3.27485
162-982A-15H-3-W 54	135.24	152.52	152.23	5.10556	5.08401	1908	49	3.28058
162-982A-15H-3-W 56	135.26	152.54	152.25	5.10589	5.08443	1805	56	3.25648
162-982A-15H-3-W 57	135.27	152.55	152.26	5.10606	5.08464	1850	83	3.26717
162-982A-15H-3-W 60	135.3	152.58	152.29	5.10656	5.08528	2173	121	3.33706
162-982A-15H-3-W 61	135.31	152.59	152.3	5.10673	5.08549	1883	37	3.27485
162-982A-15H-3-W 64.5	135.35	152.63	152.34	5.1074	5.08633	2325	91	3.36642
162-982A-15H-3-W 66	135.36	152.64	152.35	5.10757	5.08654	2158	67	3.33405
162-982A-15H-3-W 67	135.37	152.65	152.36	5.10773	5.08676	2170	79	3.33646
162-982A-15H-3-W 70	135.4	152.68	152.39	5.10824	5.08739	2197	58	3.34183
162-982A-15H-3-W 71	135.41	152.69	152.4	5.1084	5.0876	2585	97	3.41246
162-982A-15H-3-W 74	135.44	152.72	152.43	5.10891	5.08823	2265	146	3.35507
162-982A-15H-3-W 76	135.46	152.74	152.45	5.10924	5.08866	2103	53	3.32284
162-982A-15H-3-W 77	135.47	152.75	152.46	5.10941	5.08887	1906	110	3.28012
162-982A-15H-3-W 80	135.5	152.78	152.49	5.10991	5.0895	2151	66	3.33264
162-982A-15H-3-W 81	135.51	152.79	152.5	5.11008	5.08971	1940	8	3.2878
162-982A-15H-3-W 84	135.54	152.82	152.53	5.11058	5.09034	1946	84	3.28914
162-982A-15H-3-W 85	135.55	152.83	152.54	5.11075	5.09056	2061	53	3.31408
162-982A-15H-3-W 88	135.58	152.86	152.57	5.11125	5.09119	1915	76	3.28217
162-982A-15H-3-W 90	135.6	152.88	152.59	5.11158	5.09161	2006	45	3.30233
162-982A-15H-3-W 93	135.63	152.91	152.62	5.11209	5.09224	2148	74	3.33203
162-982A-15H-3-W 94	135.64	152.92	152.63	5.11225	5.09246	2341	84	3.3694
162-982A-15H-3-W 96	135.66	152.94	152.65	5.11259	5.09288	2277	91	3.35736
162-982A-15H-3-W 99	135.69	152.97	152.68	5.11309	5.09351	2617	67	3.4178
162-982A-15H-3-W 102	135.72	153	152.71	5.11359	5.09414	2488	56	3.39585
162-982A-15H-3-W 104	135.74	153.02	152.73	5.11393	5.09457	2500	114	3.39794
162-982A-15H-3-W 107	135.77	153.05	152.76	5.11443	5.0952	2617	9	3.4178
162-982A-15H-3-W 108	135.78	153.06	152.77	5.1146	5.09541	2609	60	3.41647
162-982A-15H-3-W 109	135.79	153.07	152.78	5.11477	5.09562	2627	153	3.41946
162-982A-15H-3-W 112	135.82	153.1	152.81	5.11527	5.09626	2725	50	3.43537
162-982A-15H-3-W 114	135.84	153.12	152.83	5.1156	5.09668	2715	99	3.43377
162-982A-15H-3-W 116	135.86	153.14	152.85	5.11594	5.0971	2849	57	3.45469
162-982A-15H-3-W 119	135.89	153.17	152.88	5.11644	5.09773	3010	85	3.47857
162-982A-15H-3-W 120	135.9	153.18	152.89	5.11661	5.09794	3051	84	3.48444
162-982A-15H-3-W 122	135.92	153.2	152.91	5.11694	5.09837	3084	25	3.48911
162-982A-15H-3-W 124	135.94	153.22	152.93	5.11728	5.09879	2977	124	3.47378
162-982A-15H-3-W 127	135.97	153.25	152.96	5.11778	5.09942	3104	80	3.49192
162-982A-15H-3-W 128	135.98	153.26	152.97	5.11795	5.09963	3189	78	3.50365
162-982A-15H-3-W 130	136	153.28	152.99	5.11828	5.10006	2864	44	3.45697
162-982A-15H-3-W 131	136.01	153.29	153	5.11845	5.10027	2810	66	3.44871
162-982A-15H-3-W 135	136.05	153.33	153.04	5.11912	5.10111	2957	97	3.47085
162-982A-15H-3-W 136	136.06	153.34	153.05	5.11929	5.10132	2794	38	3.44623
162-982A-15H-3-W 138	136.08	153.36	153.07	5.11962	5.10174	2777	81	3.44358
162-982A-15H-3-W 140	136.1	153.38	153.09	5.11996	5.10217	2906	41	3.4633
162-982A-15H-3-W 141	136.11	153.39	153.1	5.12012	5.10238	2836	91	3.45271
162-982A-15H-3-W 142	136.12	153.4	153.11	5.12029	5.10259	2755	88	3.44012
162-982A-15H-3-W 144	136.14	153.42	153.13	5.12063	5.10301	2957	92	3.47085
162-982A-15H-3-W 145	136.15	153.43	153.14	5.12079	5.10322	2975	78	3.47349
162-982A-15H-3-W 146	136.16	153.44	153.15	5.12096	5.10343	2798	114	3.44685
162-982A-15H-3-W 147	136.17	153.45	153.16	5.12113	5.10364	2600	74	3.41497
162-982A-15H-4-W 2	136.2	153.48	153.19	5.12163	5.10428	2697	43	3.43088
162-982A-15H-4-W 4	136.22	153.5	153.21	5.12197	5.1047	2483	55	3.39498
162-982A-15H-4-W 6	136.24	153.52	153.23	5.1223	5.10512	2111	15	3.32449
162-982A-15H-4-W 8	136.26	153.54	153.25	5.12264	5.10554	1939	105	3.28758
162-982A-15H-4-W 9	136.27	153.55	153.26	5.1228	5.10576	2001	33	3.30125
162-982A-15H-4-W 12	136.3	153.58	153.29	5.12331	5.10639	1905	132	3.2799
162-982A-15H-4-W 14	136.32	153.6	153.31	5.12364	5.10681	1756	73	3.24452
162-982A-15H-4-W 17	136.35	153.63	153.34	5.12414	5.10744	1509	73	3.17869
162-982A-15H-4-W 19	136.37	153.65	153.36	5.12448	5.10787	1585	27	3.20003
162-982A-15H-4-W 20	136.38	153.66	153.37	5.12465	5.10808	1642	61	3.21537
162-982A-15H-4-W 21	136.39	153.67	153.38	5.12481	5.10829	1637	108	3.21405
162-982A-15H-4-W 22	136.4	153.68	153.39	5.12498	5.1085	1403	27	3.14706
162-982A-15H-4-W 25	136.43	153.71	153.42	5.12548	5.10913	1710	43	3.233
162-982A-15H-4-W 26	136.44	153.72	153.43	5.12565	5.10934	1646	70	3.21643
162-982A-15H-4-W 29	136.47	153.75	153.46	5.12615	5.10998	1590	65	3.2014
162-982A-15H-4-W 30	136.48	153.76	153.47	5.12632	5.11019	1517	41	3.18099
162-982A-15H-4-W 32	136.5	153.78	153.49	5.12665	5.11061	1537	46	3.18667
162-982A-15H-4-W 34	136.52	153.8	153.51	5.12699	5.11103	1697	75	3.22968
162-982A-15H-4-W 37	136.55	153.83	153.54	5.12749	5.11167	1530	-13	3.18469
162-982A-15H-4-W 39	136.57	153.85	153.56	5.12783	5.11209	1679	89	3.22505
162-982A-15H-4-W 40	136.58	153.86	153.57	5.12799	5.1123	2026	63	3.30664
162-982A-15H-4-W 43	136.61	153.89	153.6	5.1285	5.11293	1492	106	3.17377
162-982A-15H-4-W 46	136.64	153.92	153.63	5.129	5.11357	1648	78	3.21696
162-982A-15H-4-W 49	136.67	153.95	153.66	5.1295	5.1142	1521	15	3.18213
162-982A-15H-4-W 50	136.68	153.96	153.67	5.12967	5.11441	1564	76	3.19424
162-982A-15H-4-W 54	136.72	154	153.71	5.13034	5.11526	1888	43	3.276
162-982A-15H-4-W 56	136.74	154.02	153.73	5.13067	5.11568	1653	32	3.21827
162-982A-15H-4-W 58	136.76	154.04	153.75	5.13101	5.1161	1472	34	3.16791
162-982A-15H-4-W 59	136.77	154.05	153.76	5.13118	5.11631	1368	59	3.13609
162-982A-15H-4-W 61	136.79	154.07	153.78	5.13151	5.11673	1470	70	3.16732
162-982A-15H-4-W 64	136.82	154.1	153.81	5.13201	5.11737	1499	41	3.1758
162-982A-15H-4-W 66	136.84	154.12	153.83	5.13235	5.11779	1841	54	3.26505
162-982A-15H-4-W 67	136.85	154.13	153.84	5.13251	5.118	1645	87	3.21617
162-982A-15H-4-W 70	136.88	154.16	153.87	5.13302	5.11879	1672	58	3.22324
162-982A-15H-4-W 72	136.9	154.18	153.89	5.13335	5.11932	1529	58	3.18441
162-982A-15H-4-W 74	136.92	154.2	153.91	5.13369	5.11985	1766	46	3.24699
162-982A-15H-4-W 75	136.93	154.21	153.92	5.13385	5.12011	1742	59	3.24105
162-982A-15H-4-W 78	136.96	154.24	153.95	5.13436	5.12091	1838	102	3.26435
162-982A-15H-4-W 80	136.98	154.26	153.97	5.13469	5.12143	1904	61	3.27967
162-982A-15H-4-W 83	137.01	154.29	154	5.13519	5.12223	2073	73	3.3166
162-982A-15H-4-W 84	137.02	154.3	154.01	5.13536	5.12249	1964	112	3.29314
162-982A-15H-4-W 87	137.05	154.33	154.04	5.13586	5.12328	2049	51	3.31154
162-982A-15H-4-W 88	137.06	154.34	154.05	5.13603	5.12355	2011	51	3.30341
162-982A-15H-4-W 91	137.09	154.37	154.08	5.13653	5.12434	2488	73	3.39585
162-982A-15H-4-W 92	137.1	154.38	154.09	5.1367	5.1246	2190	72	3.34044
162-982A-15H-4-W 94.5	137.13	154.41	154.12	5.1372	5.1254	2749	31	3.43917
162-982A-15H-4-W 97	137.15	154.43	154.14	5.13754	5.12592	3182	59	3.5027
162-982A-15H-4-W 98	137.16	154.44	154.15	5.13771	5.12619	2967	74	3.47232
162-982A-15H-4-W 101	137.19	154.47	154.18	5.13821	5.12698	2847	27	3.45439
162-982A-15H-4-W 102	137.2	154.48	154.19	5.13838	5.12725	2876	24	3.45879
162-982A-15H-4-W 103	137.21	154.49	154.2	5.13854	5.12751	2959	61	3.47114
162-982A-15H-4-W 106	137.24	154.52	154.23	5.13905	5.1283	2732	79	3.43648
162-982A-15H-4-W 108	137.26	154.54	154.25	5.13938	5.12883	2382	32	3.37694
162-982A-15H-4-W 110	137.28	154.56	154.27	5.13972	5.12936	2449	98	3.38899
162-982A-15H-4-W 112	137.3	154.58	154.29	5.14005	5.12989	2284	75	3.3587
162-982A-15H-4-W 115	137.33	154.61	154.32	5.14055	5.13068	1955	66	3.29115
162-982A-15H-4-W 116	137.34	154.62	154.33	5.14072	5.13094	2023	97	3.306
162-982A-15H-4-W 118	137.36	154.64	154.35	5.14106	5.13147	2087	53	3.31952
162-982A-15H-4-W 121	137.39	154.67	154.38	5.14156	5.13226	1901	-5	3.27898
162-982A-15H-4-W 123	137.41	154.69	154.4	5.14189	5.13279	1801	60	3.25551
162-982A-15H-4-W 124	137.42	154.7	154.41	5.14206	5.13306	1800	76	3.25527
162-982A-15H-4-W 127	137.45	154.73	154.44	5.14256	5.13385	1842	56	3.26529
162-982A-15H-4-W 128	137.46	154.74	154.45	5.14273	5.13411	1565	-8	3.19451
162-982A-15H-4-W 130	137.48	154.76	154.47	5.14306	5.13464	1894	92	3.27738
162-982A-15H-4-W 131	137.49	154.77	154.48	5.14323	5.13491	1670	53	3.22272
162-982A-15H-4-W 136	137.54	154.82	154.53	5.14407	5.13623	1860	100	3.26951
162-982A-15H-4-W 138	137.56	154.84	154.55	5.1444	5.13675	1570	71	3.1959
162-982A-15H-4-W 139	137.57	154.85	154.56	5.14457	5.13702	1682	103	3.22583
162-982A-15H-4-W 140	137.58	154.86	154.57	5.14474	5.13728	1764	60	3.2465
162-982A-15H-5-W 2	137.7	154.98	154.69	5.14675	5.14045	2543	94	3.40535
162-982A-15H-5-W 4	137.72	155	154.71	5.14708	5.14098	2573	68	3.41044
162-982A-15H-5-W 6	137.74	155.02	154.73	5.14742	5.14151	2746	58	3.4387
162-982A-15H-5-W 9	137.77	155.05	154.76	5.14792	5.1423	2724	43	3.43521
162-982A-15H-5-W 10	137.78	155.06	154.77	5.14809	5.14257	2788	60	3.44529
162-982A-15H-5-W 13	137.81	155.09	154.8	5.14859	5.14336	2776	99	3.44342
162-982A-15H-5-W 14	137.82	155.1	154.81	5.14876	5.14362	2621	59	3.41847
162-982A-15H-5-W 17	137.85	155.13	154.84	5.14926	5.14441	2969	88	3.47261
162-982A-15H-5-W 18	137.86	155.14	154.85	5.14943	5.14468	3078	69	3.48827
162-982A-15H-5-W 20.5	137.89	155.17	154.88	5.14993	5.14547	3160	66	3.49969
162-982A-15H-5-W 23	137.91	155.19	154.9	5.15026	5.146	3168	72	3.50079
162-982A-15H-5-W 24	137.92	155.2	154.91	5.15043	5.14626	3300	121	3.51851
162-982A-15H-5-W 27	137.95	155.23	154.94	5.15093	5.14706	3768	108	3.57611
162-982A-15H-5-W 28	137.96	155.24	154.95	5.1511	5.14732	4369	100	3.64038
162-982A-15H-5-W 30	137.98	155.26	154.97	5.15144	5.14785	4851	124	3.68583
162-982A-15H-5-W 32.5	138.01	155.29	155	5.15194	5.14864	5498	224	3.7402
162-982A-15H-5-W 35	138.03	155.31	155.02	5.15227	5.14917	6437	183	3.80868
162-982A-15H-5-W 36	138.04	155.32	155.03	5.15244	5.14943	6384	178	3.80509
162-982A-15H-5-W 37	138.05	155.33	155.04	5.15261	5.1497	5946	165	3.77422
162-982A-15H-5-W 40	138.08	155.36	155.07	5.15311	5.15049	2621	73	3.8772
162-982A-15H-5-W 41	138.09	155.37	155.08	5.15328	5.15075	2621	72	3.92438
162-982A-15H-5-W 44	138.12	155.4	155.11	5.15378	5.15155	3712	74	3.56961
162-982A-15H-5-W 45	138.13	155.41	155.12	5.15395	5.15181	3678	151	3.56561
162-982A-15H-5-W 47.5	138.16	155.44	155.15	5.15445	5.1526	2931	49	3.46702
162-982A-15H-5-W 50	138.18	155.46	155.17	5.15479	5.15313	3574	64	3.55315
162-982A-15H-5-W 52	138.2	155.48	155.19	5.15512	5.15366	3374	66	3.52815
162-982A-15H-5-W 53	138.21	155.49	155.2	5.15529	5.15392	3158	54	3.49941
162-982A-15H-5-W 56	138.24	155.52	155.23	5.15579	5.15472	2297	62	3.36116
162-982A-15H-5-W 57	138.25	155.53	155.24	5.15596	5.15498	2334	31	3.3681
162-982A-15H-5-W 60	138.28	155.56	155.27	5.15646	5.15577	2489	56	3.39602
162-982A-15H-5-W 63	138.31	155.59	155.3	5.15696	5.15657	2380	76	3.37658
162-982A-15H-5-W 64	138.32	155.6	155.31	5.15713	5.15683	2145	56	3.33143
162-982A-15H-5-W 67	138.35	155.63	155.34	5.15763	5.15762	2390	23	3.3784
162-982A-15H-5-W 68	138.36	155.64	155.35	5.1578	5.15789	2417	73	3.38328
162-982A-15H-5-W 69	138.37	155.65	155.36	5.15797	5.15815	2197	62	3.34183
162-982A-15H-5-W 72	138.4	155.68	155.39	5.15847	5.15894	2339	83	3.36903
162-982A-15H-5-W 73	138.41	155.69	155.4	5.15864	5.15921	2325	62	3.36642
162-982A-15H-5-W 74	138.42	155.7	155.41	5.1588	5.15947	2287	90	3.35927
162-982B-16H-2-W 99	140.99	155.73	155.44	5.15931	5.16016	2238	54	3.34986
162-982B-16H-2-W 102	141.02	155.76	155.47	5.15981	5.16066	2583	74	3.41212
162-982B-16H-2-W 104	141.04	155.78	155.49	5.16014	5.16098	2530	110	3.40312
162-982B-16H-2-W 106	141.06	155.8	155.51	5.16048	5.16131	2479	59	3.39428
162-982B-16H-2-W 109	141.09	155.83	155.54	5.16098	5.1618	2496	125	3.39724
162-982B-16H-2-W 110	141.1	155.84	155.55	5.16115	5.16197	2583	66	3.41212
162-982B-16H-2-W 112	141.12	155.86	155.57	5.16148	5.1623	2589	8	3.41313
162-982B-16H-2-W 113	141.13	155.87	155.58	5.16165	5.16246	2465	110	3.39182
162-982B-16H-2-W 116	141.16	155.9	155.61	5.16215	5.16295	2402	74	3.38057
162-982B-16H-2-W 118	141.18	155.92	155.63	5.16249	5.16328	2230	34	3.3483
162-982B-16H-2-W 120	141.2	155.94	155.65	5.16282	5.16361	2293	64	3.3604
162-982B-16H-2-W 122	141.22	155.96	155.67	5.16316	5.16394	2560	74	3.40824
162-982B-16H-2-W 123	141.23	155.97	155.68	5.16332	5.1641	2512	45	3.40002
162-982B-16H-2-W 126	141.26	156	155.71	5.16383	5.16459	2403	59	3.38075
162-982B-16H-2-W 128	141.28	156.02	155.73	5.16416	5.16492	2223	73	3.34694
162-982B-16H-2-W 129	141.29	156.03	155.74	5.16433	5.16508	2385	76	3.37749
162-982B-16H-2-W 132	141.32	156.06	155.77	5.16483	5.16558	2342	81	3.36959
162-982B-16H-2-W 134	141.34	156.08	155.79	5.16517	5.1659	2906	78	3.4633
162-982B-16H-2-W 135	141.35	156.09	155.8	5.16533	5.16607	2797	37	3.44669
162-982B-16H-2-W 140	141.4	156.14	155.85	5.16617	5.16689	3003	72	3.47756
162-982B-16H-2-W 142	141.42	156.16	155.87	5.16651	5.16722	2983	61	3.47465
162-982B-16H-2-W 144	141.44	156.18	155.89	5.16684	5.16754	3152	36	3.49859
162-982B-16H-2-W 148	141.48	156.22	155.93	5.16751	5.1682	3332	47	3.52271
162-982B-16H-3-W 2	141.52	156.26	155.97	5.16818	5.16886	3340	84	3.52375
162-982B-16H-3-W 4	141.54	156.28	155.99	5.16852	5.16918	3510	44	3.54531
162-982B-16H-3-W 5	141.55	156.29	156	5.16868	5.16935	3493	65	3.5432
162-982B-16H-3-W 9.5	141.6	156.34	156.05	5.16952	5.17017	3429	41	3.53517
162-982B-16H-3-W 11	141.61	156.35	156.06	5.16969	5.17033	3675	72	3.56526
162-982B-16H-3-W 12	141.62	156.36	156.07	5.16986	5.1705	3640	45	3.5611
162-982B-16H-3-W 14	141.64	156.38	156.09	5.17019	5.17082	3327	84	3.52205
162-982B-16H-3-W 15	141.65	156.39	156.1	5.17036	5.17099	3337	49	3.52336
162-982B-16H-3-W 21	141.71	156.45	156.16	5.17136	5.17197	2989	24	3.47553
162-982B-16H-3-W 22	141.72	156.46	156.17	5.17153	5.17214	3032	37	3.48173
162-982B-16H-3-W 23.5	141.74	156.48	156.19	5.17186	5.17246	2585	76	3.41246
162-982B-16H-3-W 36	141.86	156.6	156.31	5.17387	5.17443	1885	95	3.27531
162-982B-16H-3-W 39.5	141.9	156.64	156.35	5.17454	5.17509	2138	91	3.33001
162-982B-16H-3-W 41	141.91	156.65	156.36	5.17471	5.17525	2101	70	3.32243
162-982B-16H-3-W 42	141.92	156.66	156.37	5.17488	5.17542	2197	62	3.34183
162-982B-16H-3-W 43	141.93	156.67	156.38	5.17505	5.17558	2208	61	3.344
162-982B-16H-3-W 44.5	141.95	156.69	156.4	5.17538	5.17591	1687	97	3.22712
162-982B-16H-3-W 49.5	142	156.74	156.45	5.17622	5.17673	2005	62	3.30211
162-982B-16H-3-W 51	142.01	156.75	156.46	5.17639	5.17689	1786	86	3.25188
162-982B-16H-3-W 52	142.02	156.76	156.47	5.17655	5.17706	1721	55	3.23578
162-982B-16H-3-W 54	142.04	156.78	156.49	5.17689	5.17738	1753	61	3.24378
162-982B-16H-3-W 55	142.05	156.79	156.5	5.17706	5.17755	1637	34	3.21405
162-982B-16H-3-W 59.5	142.1	156.84	156.55	5.17789	5.17837	1456	39	3.16316
162-982B-16H-3-W 61	142.11	156.85	156.56	5.17806	5.17853	1609	79	3.20656
162-982B-16H-3-W 62	142.12	156.86	156.57	5.17823	5.1787	1380	89	3.13988
162-982B-16H-3-W 64	142.14	156.88	156.59	5.17856	5.17902	1519	15	3.18156
162-982B-16H-3-W 69.5	142.2	156.94	156.65	5.17957	5.18001	1524	61	3.18299
162-982B-16H-3-W 71	142.21	156.95	156.66	5.17973	5.18017	1703	72	3.23121
162-982B-16H-3-W 72	142.22	156.96	156.67	5.1799	5.18034	1532	56	3.18526
162-982B-16H-3-W 74	142.24	156.98	156.69	5.18024	5.18066	1538	84	3.18696
162-982B-16H-3-W 75	142.25	156.99	156.7	5.1804	5.18083	1548	60	3.18977
162-982B-16H-3-W 79.5	142.3	157.04	156.75	5.18124	5.18165	1691	59	3.22814
162-982B-16H-3-W 81	142.31	157.05	156.76	5.18141	5.18181	1717	110	3.23477
162-982B-16H-3-W 82	142.32	157.06	156.77	5.18158	5.18198	1677	63	3.22453
162-982B-16H-3-W 84	142.34	157.08	156.79	5.18191	5.1823	1591	87	3.20167
162-982B-16H-3-W 85	142.35	157.09	156.8	5.18208	5.18247	1584	106	3.19976
162-982B-16H-3-W 86	142.36	157.1	156.81	5.18225	5.18263	1682	92	3.22583
162-982B-16H-3-W 89.5	142.4	157.14	156.85	5.18292	5.18329	1666	42	3.22167
162-982B-16H-3-W 91	142.41	157.15	156.86	5.18308	5.18345	1804	5	3.25624
162-982B-16H-3-W 92	142.42	157.16	156.87	5.18325	5.18362	1588	40	3.20085
162-982B-16H-3-W 94	142.44	157.18	156.89	5.18359	5.18394	1716	16	3.23452
162-982B-16H-3-W 96	142.46	157.2	156.91	5.18392	5.18427	1619	97	3.20925
162-982B-16H-3-W 100	142.5	157.24	156.95	5.18459	5.18493	1472	129	3.16791
162-982B-16H-3-W 102	142.52	157.26	156.97	5.18493	5.18526	1692	-3	3.2284
162-982B-16H-3-W 104	142.54	157.28	156.99	5.18526	5.18558	1558	17	3.19257
162-982B-16H-3-W 105	142.55	157.29	157	5.18543	5.18575	1632	95	3.21272
162-982B-16H-3-W 109.5	142.6	157.34	157.05	5.18626	5.18657	1692	64	3.2284
162-982B-16H-3-W 111	142.61	157.35	157.06	5.18643	5.18673	1575	74	3.19728
162-982B-16H-3-W 112	142.62	157.36	157.07	5.1866	5.1869	1708	47	3.23249
162-982B-16H-3-W 114	142.64	157.38	157.09	5.18693	5.18722	1727	59	3.23729
162-982B-16H-3-W 115	142.65	157.39	157.1	5.1871	5.18739	1588	82	3.20085
162-982B-16H-3-W 116	142.66	157.4	157.11	5.18727	5.18755	1546	19	3.18921
162-982B-16H-3-W 121	142.71	157.45	157.16	5.18811	5.18837	1529	51	3.18441
162-982B-16H-3-W 122	142.72	157.46	157.17	5.18827	5.18854	1419	60	3.15198
162-982B-16H-3-W 124	142.74	157.48	157.19	5.18861	5.18886	1510	36	3.17898
162-982B-16H-3-W 125	142.75	157.49	157.2	5.18878	5.18903	1556	53	3.19201
162-982B-16H-3-W 129.5	142.8	157.54	157.25	5.18961	5.18985	1485	118	3.17173
162-982B-16H-3-W 131	142.81	157.55	157.26	5.18978	5.19001	1576	75	3.19756
162-982B-16H-3-W 132	142.82	157.56	157.27	5.18995	5.19018	1438	31	3.15776
162-982B-16H-3-W 134	142.84	157.58	157.29	5.19028	5.1905	1532	40	3.18526
162-982B-16H-3-W 135	142.85	157.59	157.3	5.19045	5.19067	1516	68	3.1807
162-982B-16H-3-W 141	142.91	157.65	157.36	5.19146	5.19165	1654	85	3.21854
162-982B-16H-3-W 142	142.92	157.66	157.37	5.19162	5.19182	1722	43	3.23603
162-982B-16H-3-W 144	142.94	157.68	157.39	5.19196	5.19214	1609	68	3.20656
162-982B-16H-3-W 145	142.95	157.69	157.4	5.19213	5.19231	1499	83	3.1758
162-982B-16H-4-W 2	143.02	157.76	157.47	5.1933	5.19346	1463	36	3.16524
162-982B-16H-4-W 4	143.04	157.78	157.49	5.19363	5.19378	1595	43	3.20276
162-982B-16H-4-W 6	143.06	157.8	157.51	5.19397	5.19411	1605	26	3.20548
162-982B-16H-4-W 9.5	143.1	157.84	157.55	5.19464	5.19477	1591	65	3.20167
162-982B-16H-4-W 11	143.11	157.85	157.56	5.1948	5.19493	1586	71	3.2003
162-982B-16H-4-W 12	143.12	157.86	157.57	5.19497	5.1951	1745	40	3.2418
162-982B-16H-4-W 14	143.14	157.88	157.59	5.19531	5.19542	1550	116	3.19033
162-982B-16H-4-W 16	143.16	157.9	157.61	5.19564	5.19575	1753	87	3.24378
162-982B-16H-4-W 19.5	143.2	157.94	157.65	5.19631	5.19641	1707	31	3.23223
162-982B-16H-4-W 21	143.21	157.95	157.66	5.19648	5.19657	1740	81	3.24055
162-982B-16H-4-W 22	143.22	157.96	157.67	5.19665	5.19674	1665	63	3.22141
162-982B-16H-4-W 24	143.24	157.98	157.69	5.19698	5.19706	1857	113	3.26881
162-982B-16H-4-W 25	143.25	157.99	157.7	5.19715	5.19723	1957	23	3.29159
162-982B-16H-4-W 29.5	143.3	158.04	157.75	5.19799	5.19805	1914	54	3.28194
162-982B-16H-4-W 31	143.31	158.05	157.76	5.19815	5.19821	1767	76	3.24724
162-982B-16H-4-W 32	143.32	158.06	157.77	5.19832	5.19838	1784	60	3.25139
162-982B-16H-4-W 34	143.34	158.08	157.79	5.19866	5.1987	1906	-3	3.28012
162-982B-16H-4-W 36	143.36	158.1	157.81	5.19899	5.19903	1792	72	3.25334
162-982B-16H-4-W 39.5	143.4	158.14	157.85	5.19966	5.19969	1752	49	3.24353
162-982B-16H-4-W 41	143.41	158.15	157.86	5.19983	5.19985	1846	27	3.26623
162-982B-16H-4-W 42	143.42	158.16	157.87	5.2	5.20002	1736	110	3.23955
162-982B-16H-4-W 44	143.44	158.18	157.89	5.20033	5.20034	1833	64	3.26316
162-982B-16H-4-W 46	143.46	158.2	157.91	5.20066	5.20067	1846	111	3.26623
162-982B-16H-4-W 50	143.5	158.24	157.95	5.20145	5.20145	1765	57	3.24674
162-982B-16H-4-W 51	143.51	158.25	157.96	5.20168	5.20168	1894	39	3.27738
162-982B-16H-4-W 53	143.53	158.27	157.98	5.20213	5.20213	1716	10	3.23452
162-982B-16H-4-W 54	143.54	158.28	157.99	5.20235	5.20235	1902	83	3.27921
162-982B-16H-4-W 56	143.56	158.3	158.01	5.2028	5.2028	1948	53	3.28959
162-982B-16H-4-W 60	143.6	158.34	158.05	5.20371	5.20371	2165	53	3.33546
162-982B-16H-4-W 63	143.63	158.37	158.08	5.20438	5.20438	1944	71	3.2887
162-982B-16H-4-W 64	143.64	158.38	158.09	5.20461	5.20461	2040	98	3.30963
162-982B-16H-4-W 65	143.65	158.39	158.1	5.20483	5.20483	1873	68	3.27254
162-982B-16H-4-W 71	143.71	158.45	158.16	5.20619	5.20619	1955	36	3.29115
162-982B-16H-4-W 72	143.72	158.46	158.17	5.20641	5.20641	1806	47	3.25672
162-982B-16H-4-W 74	143.74	158.48	158.19	5.20686	5.20686	1813	91	3.2584
162-982B-16H-4-W 75.5	143.76	158.5	158.21	5.20732	5.20732	2060	120	3.31387
162-982B-16H-4-W 79.5	143.8	158.54	158.25	5.20822	5.20822	2105	85	3.32325
162-982B-16H-4-W 80.5	143.81	158.55	158.26	5.20844	5.20844	1907	54	3.28035
162-982B-16H-4-W 83	143.83	158.57	158.28	5.20889	5.20889	2106	9	3.32346
162-982B-16H-4-W 84	143.84	158.58	158.29	5.20912	5.20912	2021	72	3.30557
162-982B-16H-4-W 85	143.85	158.59	158.3	5.20935	5.20935	2160	73	3.33445
162-982B-16H-4-W 89.5	143.9	158.64	158.35	5.21047	5.21047	2076	60	3.31723
162-982B-16H-4-W 91	143.91	158.65	158.36	5.2107	5.2107	1789	9	3.25261
162-982B-16H-4-W 92	143.92	158.66	158.37	5.21092	5.21092	1973	39	3.29513
162-982B-16H-4-W 94	143.94	158.68	158.39	5.21138	5.21138	2026	59	3.30664
162-982B-16H-4-W 95	143.95	158.69	158.4	5.2116	5.2116	1924	84	3.28421
162-982B-16H-4-W 96	143.96	158.7	158.41	5.21183	5.21183	1831	32	3.26269
162-982B-16H-4-W 99.5	144	158.74	158.45	5.21273	5.21273	1864	64	3.27045
162-982B-16H-4-W 101	144.01	158.75	158.46	5.21296	5.21296	2059	69	3.31366
162-982B-16H-4-W 102	144.02	158.76	158.47	5.21318	5.21318	2156	95	3.33365
162-982B-16H-4-W 104	144.04	158.78	158.49	5.21363	5.21363	2409	58	3.38184
162-982B-16H-4-W 105.5	144.06	158.8	158.51	5.21408	5.21408	2317	42	3.36493
162-982B-16H-4-W 109.5	144.1	158.84	158.55	5.21498	5.21498	2519	80	3.40123
162-982B-16H-4-W 111	144.11	158.85	158.56	5.21521	5.21521	2445	110	3.38828
162-982B-16H-4-W 112	144.12	158.86	158.57	5.21544	5.21544	2603	53	3.41547
162-982B-16H-4-W 113	144.13	158.87	158.58	5.21566	5.21566	2433	68	3.38614
162-982B-16H-4-W 115	144.15	158.89	158.6	5.21611	5.21611	2584	66	3.41229
162-982B-16H-4-W 116	144.16	158.9	158.61	5.21634	5.21634	2608	91	3.41631
162-982B-16H-4-W 119.5	144.2	158.94	158.65	5.21724	5.21724	2418	94	3.38346
162-982B-16H-4-W 121	144.21	158.95	158.66	5.21747	5.21747	2293	38	3.3604
162-982B-16H-4-W 122	144.22	158.96	158.67	5.21769	5.21769	2379	31	3.37639
162-982B-16H-4-W 123	144.23	158.97	158.68	5.21792	5.21792	2572	48	3.41027
162-982B-16H-4-W 126	144.26	159	158.71	5.21859	5.21859	2625	112	3.41913
162-982B-16H-4-W 129.5	144.3	159.04	158.75	5.2195	5.2195	2290	117	3.35984
162-982B-16H-4-W 131	144.31	159.05	158.76	5.21972	5.21972	2701	102	3.43152
162-982B-16H-4-W 132	144.32	159.06	158.77	5.21995	5.21995	3059	46	3.48558
162-982B-16H-4-W 134	144.34	159.08	158.79	5.2204	5.2204	2577	113	3.41111
162-982B-16H-4-W 135	144.35	159.09	158.8	5.22062	5.22062	2643	66	3.4221
162-982B-16H-4-W 136	144.36	159.1	158.81	5.22085	5.22085	2806	82	3.44809
162-982B-16H-4-W 140	144.4	159.14	158.85	5.22175	5.22175	2807	39	3.44824
162-982B-16H-4-W 141	144.41	159.15	158.86	5.22198	5.22198	2737	51	3.43727
162-982B-16H-4-W 142	144.42	159.16	158.87	5.2222	5.2222	2927	118	3.46642
162-982B-16H-4-W 144.5	144.45	159.19	158.9	5.22288	5.22288	2893	106	3.46135
162-982B-16H-5-W 2	144.52	159.26	158.97	5.22446	5.22446	2640	79	3.4216
162-982B-16H-5-W 4	144.54	159.28	158.99	5.22491	5.22491	2674	43	3.42716
162-982B-16H-5-W 5	144.55	159.29	159	5.22514	5.22514	2904	36	3.463
162-982B-16H-5-W 10	144.6	159.34	159.05	5.22626	5.22626	2662	53	3.42521
162-982B-16H-5-W 12	144.62	159.36	159.07	5.22671	5.22671	2562	91	3.40858
162-982B-16H-5-W 14	144.64	159.38	159.09	5.22717	5.22717	2480	30	3.39445
162-982B-16H-5-W 15	144.65	159.39	159.1	5.22739	5.22739	2573	26	3.41044
162-982B-16H-5-W 19.5	144.7	159.44	159.15	5.22852	5.22852	2350	73	3.37107
162-982B-16H-5-W 21	144.71	159.45	159.16	5.22874	5.22874	2466	56	3.39199
162-982B-16H-5-W 22	144.72	159.46	159.17	5.22897	5.22897	2276	56	3.35717
162-982B-16H-5-W 24	144.74	159.48	159.19	5.22942	5.22942	2285	23	3.35889
162-982B-16H-5-W 25	144.75	159.49	159.2	5.22965	5.22965	2471	51	3.39287
162-982B-16H-5-W 29.5	144.8	159.54	159.25	5.23077	5.23077	2336	43	3.36847
162-982B-16H-5-W 30	144.8	159.54	159.25	5.23077	5.23077	2347	53	3.37051
162-982B-16H-5-W 31	144.81	159.55	159.26	5.231	5.231	2559	78	3.40807
162-982B-16H-5-W 32	144.82	159.56	159.27	5.23123	5.23123	2246	106	3.35141
162-982B-16H-5-W 33	144.83	159.57	159.28	5.23145	5.23145	2190	67	3.34044
162-982B-16H-5-W 39.5	144.9	159.64	159.35	5.23303	5.23303	2289	53	3.35965
162-982B-16H-5-W 40	144.9	159.64	159.35	5.23303	5.23303	2378	57	3.37621
162-982B-16H-5-W 41	144.91	159.65	159.36	5.23326	5.23326	2273	83	3.3566
162-982B-16H-5-W 42	144.92	159.66	159.37	5.23348	5.23348	2500	66	3.39794
162-982B-16H-5-W 43	144.93	159.67	159.38	5.23371	5.23371	2446	66	3.38846
162-982B-16H-5-W 45	144.95	159.69	159.4	5.23416	5.23416	2664	97	3.42553
162-982B-16H-5-W 49.5	145	159.74	159.45	5.23529	5.23529	2553	91	3.40705
162-982B-16H-5-W 51	145.01	159.75	159.46	5.23551	5.23551	2468	58	3.39235
162-982B-16H-5-W 52	145.02	159.76	159.47	5.23574	5.23574	2621	88	3.41847
162-982B-16H-5-W 54	145.04	159.78	159.49	5.23619	5.23619	2513	105	3.40019
162-982B-16H-5-W 55.5	145.06	159.8	159.51	5.23664	5.23664	2534	75	3.40381
162-982B-16H-5-W 59.5	145.1	159.84	159.55	5.23754	5.23754	2253	55	3.35276
162-982B-16H-5-W 61	145.11	159.85	159.56	5.23777	5.23777	2336	31	3.36847
162-982B-16H-5-W 62	145.12	159.86	159.57	5.23799	5.23799	2285	73	3.35889
162-982B-16H-5-W 64	145.14	159.88	159.59	5.23844	5.23844	2425	72	3.38471
162-982B-16H-5-W 65	145.15	159.89	159.6	5.23867	5.23867	2048	81	3.31133
162-982B-16H-5-W 66	145.16	159.9	159.61	5.23889	5.23889	2211	41	3.34459
162-982B-16H-5-W 71	145.21	159.95	159.66	5.24002	5.24002	1907	118	3.28035
162-982B-16H-5-W 72	145.22	159.96	159.67	5.24025	5.24025	2147	111	3.33183
162-982B-16H-5-W 74	145.24	159.98	159.69	5.2407	5.2407	1717	56	3.23477
162-982B-16H-5-W 76	145.26	160	159.71	5.24115	5.24115	1950	36	3.29003
162-982B-16H-5-W 79.5	145.3	160.04	159.75	5.24205	5.24205	1794	81	3.25382
162-982B-16H-5-W 81	145.31	160.05	159.76	5.24228	5.24228	2060	33	3.31387
162-982B-16H-5-W 82	145.32	160.06	159.77	5.2425	5.2425	1906	66	3.28012
162-982B-16H-5-W 84	145.34	160.08	159.79	5.24295	5.24295	1983	73	3.29732
162-982B-16H-5-W 85	145.35	160.09	159.8	5.24318	5.24318	1906	26	3.28012
162-982B-16H-5-W 89.5	145.4	160.14	159.85	5.24431	5.24431	2045	101	3.31069
162-982B-16H-5-W 91	145.41	160.15	159.86	5.24453	5.24453	1919	77	3.28307
162-982B-16H-5-W 92	145.42	160.16	159.87	5.24476	5.24476	1955	88	3.29115
162-982B-16H-5-W 94	145.44	160.18	159.89	5.24521	5.24521	2035	51	3.30856
162-982B-16H-5-W 96	145.46	160.2	159.91	5.24566	5.24566	2057	46	3.31323
162-982B-16H-5-W 100	145.5	160.24	159.95	5.24656	5.24656	1782	60	3.25091
162-982B-16H-5-W 101	145.51	160.25	159.96	5.24679	5.24679	2057	41	3.31323
162-982B-16H-5-W 102	145.52	160.26	159.97	5.24702	5.24702	1984	43	3.29754
162-982B-16H-5-W 104	145.54	160.28	159.99	5.24747	5.24747	2015	117	3.30428
162-982B-16H-5-W 105	145.55	160.29	160	5.24769	5.24769	2008	47	3.30276
162-982B-16H-5-W 110	145.6	160.34	160.05	5.24882	5.24882	1919	18	3.28307
162-982B-16H-5-W 111	145.61	160.35	160.06	5.24904	5.24904	2116	71	3.32552
162-982B-16H-5-W 112	145.62	160.36	160.07	5.24927	5.24927	1954	77	3.29092
162-982B-16H-5-W 114	145.64	160.38	160.09	5.24972	5.24972	2137	53	3.3298
162-982B-16H-5-W 115.5	145.66	160.4	160.11	5.25017	5.25017	2101	83	3.32243
162-982B-16H-5-W 121	145.71	160.45	160.16	5.2513	5.2513	2063	85	3.3145
162-982B-16H-5-W 122	145.72	160.46	160.17	5.25153	5.25153	2081	92	3.31827
162-982B-16H-5-W 123	145.73	160.47	160.18	5.25175	5.25175	2073	111	3.3166
162-982B-16H-5-W 129.5	145.8	160.54	160.25	5.25333	5.25333	1936	-13	3.28691
162-982B-16H-5-W 131	145.81	160.55	160.26	5.25356	5.25356	1839	85	3.26458
162-982B-16H-5-W 132	145.82	160.56	160.27	5.25378	5.25378	1906	35	3.28012
162-982B-16H-5-W 134	145.84	160.58	160.29	5.25423	5.25423	2057	74	3.31323
162-982B-16H-5-W 135.5	145.86	160.6	160.31	5.25468	5.25468	1893	37	3.27715
162-982B-16H-5-W 139.5	145.9	160.64	160.35	5.25559	5.25559	2132	49	3.32879
162-982B-16H-5-W 141	145.91	160.65	160.36	5.25581	5.25581	2128	54	3.32797
162-982B-16H-5-W 142	145.92	160.66	160.37	5.25604	5.25604	2144	90	3.33122
162-982B-16H-5-W 144	145.94	160.68	160.39	5.25649	5.25649	2085	62	3.31911
162-982B-16H-5-W 145.5	145.96	160.7	160.41	5.25694	5.25694	2128	55	3.32797
162-982B-16H-6-W 2	146.02	160.76	160.47	5.25829	5.25829	2155	56	3.33345
162-982B-16H-6-W 4	146.04	160.78	160.49	5.25874	5.25874	2175	64	3.33746
162-982B-16H-6-W 5	146.05	160.79	160.5	5.25897	5.25897	2217	85	3.34577
162-982B-16H-6-W 10	146.1	160.84	160.55	5.2601	5.2601	2616	87	3.41764
162-982B-16H-6-W 13	146.13	160.87	160.58	5.26077	5.26077	2404	61	3.38093
162-982B-16H-6-W 14	146.14	160.88	160.59	5.261	5.261	2137	45	3.3298
162-982B-16H-6-W 15	146.15	160.89	160.6	5.26123	5.26123	2346	65	3.37033
162-982B-16H-6-W 19.5	146.2	160.94	160.65	5.26235	5.26235	2294	102	3.36059
162-982B-16H-6-W 21	146.21	160.95	160.66	5.26258	5.26258	2610	91	3.41664
162-982B-16H-6-W 23	146.23	160.97	160.68	5.26303	5.26303	2200	47	3.34242
162-982B-16H-6-W 24	146.24	160.98	160.69	5.26326	5.26326	2230	76	3.3483
162-982B-16H-6-W 25	146.25	160.99	160.7	5.26348	5.26348	2313	105	3.36418
162-982B-16H-6-W 30	146.3	161.04	160.75	5.26461	5.26461	2151	71	3.33264
162-982B-16H-6-W 32	146.32	161.06	160.77	5.26506	5.26506	2261	50	3.3543
162-982B-16H-6-W 34	146.34	161.08	160.79	5.26551	5.26551	2085	47	3.31911
162-982B-16H-6-W 36	146.36	161.1	160.81	5.26596	5.26596	1922	45	3.28375
162-982B-16H-6-W 41	146.41	161.15	160.86	5.26709	5.26709	2022	10	3.30578
162-982B-16H-6-W 42	146.42	161.16	160.87	5.26732	5.26732	2009	51	3.30298
162-982B-16H-6-W 44	146.44	161.18	160.89	5.26777	5.26777	1776	75	3.24944
162-982B-16H-6-W 45	146.45	161.19	160.9	5.26799	5.26799	1918	51	3.28285
162-982B-16H-6-W 49.5	146.5	161.24	160.95	5.26912	5.26912	1775	68	3.2492
162-982B-16H-6-W 51	146.51	161.25	160.96	5.26935	5.26935	1892	43	3.27692
162-982B-16H-6-W 53	146.53	161.27	160.98	5.2698	5.2698	1910	3	3.28103
162-982B-16H-6-W 54	146.54	161.28	160.99	5.27002	5.27002	1888	42	3.276
162-982B-16H-6-W 55	146.55	161.29	161	5.27025	5.27025	1968	32	3.29403
162-982B-16H-6-W 62	146.62	161.36	161.07	5.27183	5.27183	2123	53	3.32695
162-982B-16H-6-W 65	146.65	161.39	161.1	5.2725	5.2725	1972	77	3.29491
162-982B-16H-6-W 66	146.66	161.4	161.11	5.27273	5.27273	2069	76	3.31576
162-982B-16H-6-W 67	146.67	161.41	161.12	5.27295	5.27295	1963	38	3.29292
162-982B-16H-6-W 70	146.7	161.44	161.15	5.27363	5.27363	2324	71	3.36624
162-982B-16H-6-W 71	146.71	161.45	161.16	5.27386	5.27386	2064	86	3.31471
162-982B-16H-6-W 74	146.74	161.48	161.19	5.27453	5.27453	2109	82	3.32408
162-982B-16H-6-W 76	146.76	161.5	161.21	5.27499	5.27499	2076	79	3.31723
162-982B-16H-6-W 77	146.77	161.51	161.22	5.27521	5.27521	2186	78	3.33965
162-982B-16H-6-W 80	146.8	161.54	161.25	5.27589	5.27589	2104	62	3.32305
162-982B-16H-6-W 82	146.82	161.56	161.27	5.27634	5.27634	2083	71	3.31869
162-982A-16H-2-W 63	143.33	161.45	161.3	5.27702	5.27702	2343	93	3.36977
162-982A-16H-2-W 64	143.34	161.46	161.31	5.27724	5.27724	2208	66	3.344
162-982A-16H-2-W 66	143.36	161.48	161.33	5.27769	5.27769	1979	26	3.29645
162-982A-16H-2-W 68	143.38	161.5	161.35	5.27814	5.27814	1994	62	3.29973
162-982A-16H-2-W 70	143.4	161.52	161.37	5.27859	5.27859	2004	101	3.3019
162-982A-16H-2-W 72	143.42	161.54	161.39	5.27905	5.27905	1887	55	3.27577
162-982A-16H-2-W 73	143.43	161.55	161.4	5.27927	5.27927	1786	58	3.25188
162-982A-16H-2-W 77	143.47	161.59	161.44	5.28017	5.28017	1986	27	3.29798
162-982A-16H-2-W 78	143.48	161.6	161.45	5.2804	5.2804	1786	82	3.25188
162-982A-16H-2-W 80	143.5	161.62	161.47	5.28085	5.28085	1995	65	3.29994
162-982A-16H-2-W 83	143.53	161.65	161.5	5.28153	5.28153	1887	29	3.27577
162-982A-16H-2-W 84	143.54	161.66	161.51	5.28175	5.28175	1882	56	3.27462
162-982A-16H-2-W 86	143.56	161.68	161.53	5.2822	5.2822	2138	66	3.33001
162-982A-16H-2-W 88	143.58	161.7	161.55	5.28265	5.28265	2248	91	3.3518
162-982A-16H-2-W 89	143.59	161.71	161.56	5.28288	5.28288	2037	68	3.30899
162-982A-16H-2-W 97	143.67	161.79	161.64	5.28468	5.28468	2758	89	3.44059
162-982A-16H-2-W 98	143.68	161.8	161.65	5.28491	5.28491	2660	30	3.42488
162-982A-16H-2-W 100	143.7	161.82	161.67	5.28536	5.28536	2495	70	3.39707
162-982A-16H-2-W 103	143.73	161.85	161.7	5.28604	5.28604	2510	47	3.39967
162-982A-16H-2-W 104	143.74	161.86	161.71	5.28626	5.28626	2484	17	3.39515
162-982A-16H-2-W 106	143.76	161.88	161.73	5.28671	5.28671	2575	127	3.41078
162-982A-16H-2-W 109	143.79	161.91	161.76	5.28739	5.28739	2675	72	3.42732
162-982A-16H-2-W 110	143.8	161.92	161.77	5.28762	5.28762	2799	70	3.447
162-982A-16H-2-W 112	143.82	161.94	161.79	5.28807	5.28807	2815	93	3.44948
162-982A-16H-2-W 114	143.84	161.96	161.81	5.28852	5.28852	2589	64	3.41313
162-982A-16H-2-W 116	143.86	161.98	161.83	5.28897	5.28897	2603	35	3.41547
162-982A-16H-2-W 117	143.87	161.99	161.84	5.2892	5.2892	2669	17	3.42635
162-982A-16H-2-W 121	143.91	162.03	161.88	5.2901	5.2901	2318	74	3.36511
162-982A-16H-2-W 122	143.92	162.04	161.89	5.29032	5.29032	2371	156	3.37493
162-982A-16H-2-W 124	143.94	162.06	161.91	5.29077	5.29077	2367	64	3.3742
162-982A-16H-2-W 126	143.96	162.08	161.93	5.29123	5.29123	2450	98	3.38917
162-982A-16H-2-W 127	143.97	162.09	161.94	5.29145	5.29145	2283	56	3.35851
162-982A-16H-2-W 130	144	162.12	161.97	5.29213	5.29213	2432	78	3.38596
162-982A-16H-2-W 132	144.02	162.14	161.99	5.29258	5.29258	2293	39	3.3604
162-982A-16H-2-W 134	144.04	162.16	162.01	5.29303	5.29303	2260	89	3.35411
162-982A-16H-2-W 135	144.05	162.17	162.02	5.29326	5.29326	2232	70	3.34869
162-982A-16H-2-W 138	144.08	162.2	162.05	5.29393	5.29393	2339	61	3.36903
162-982A-16H-2-W 141	144.11	162.23	162.08	5.29461	5.29461	2405	44	3.38112
162-982A-16H-2-W 142	144.12	162.24	162.09	5.29483	5.29483	2451	17	3.38934
162-982A-16H-2-W 145	144.15	162.27	162.12	5.29551	5.29551	2205	58	3.34341
162-982A-16H-2-W 146	144.16	162.28	162.13	5.29574	5.29574	2434	98	3.38632
162-982A-16H-2-W 148	144.18	162.3	162.15	5.29619	5.29619	2636	95	3.42095
162-982A-16H-2-W 149	144.19	162.31	162.16	5.29641	5.29641	2304	14	3.36248
162-982A-16H-3-W 2	144.22	162.34	162.19	5.29709	5.29709	2641	69	3.42177
162-982A-16H-3-W 4	144.24	162.36	162.21	5.29754	5.29754	2551	56	3.40671
162-982A-16H-3-W 7	144.27	162.39	162.24	5.29822	5.29822	2537	99	3.40432
162-982A-16H-3-W 8	144.28	162.4	162.25	5.29844	5.29844	2483	103	3.39498
162-982A-16H-3-W 9	144.29	162.41	162.26	5.29867	5.29867	2472	114	3.39305
162-982A-16H-3-W 12	144.32	162.44	162.29	5.29935	5.29935	2366	101	3.37401
162-982A-16H-3-W 14	144.34	162.46	162.31	5.2998	5.2998	2222	50	3.34674
162-982A-16H-3-W 15	144.35	162.47	162.32	5.30002	5.30002	2119	99	3.32613
162-982A-16H-3-W 18	144.38	162.5	162.35	5.3007	5.3007	2074	77	3.31681
162-982A-16H-3-W 19	144.39	162.51	162.36	5.30092	5.30092	2173	99	3.33706
162-982A-16H-3-W 22	144.42	162.54	162.39	5.3016	5.3016	2200	73	3.34242
162-982A-16H-3-W 23	144.43	162.55	162.4	5.30183	5.30183	2179	98	3.33826
162-982A-16H-3-W 26	144.46	162.58	162.43	5.3025	5.3025	2544	122	3.40552
162-982A-16H-3-W 28	144.48	162.6	162.45	5.30295	5.30295	2654	63	3.4239
162-982A-16H-3-W 31	144.51	162.63	162.48	5.30363	5.30363	2253	71	3.35276
162-982A-16H-3-W 32	144.52	162.64	162.49	5.30386	5.30386	2409	104	3.38184
162-982A-16H-3-W 33	144.53	162.65	162.5	5.30408	5.30408	2336	119	3.36847
162-982A-16H-3-W 36	144.56	162.68	162.53	5.30476	5.30476	2666	20	3.42586
162-982A-16H-3-W 38	144.58	162.7	162.55	5.30521	5.30521	2554	126	3.40722
162-982A-16H-3-W 41	144.61	162.73	162.58	5.30589	5.30589	2500	63	3.39794
162-982A-16H-3-W 42	144.62	162.74	162.59	5.30611	5.30611	2608	40	3.41631
162-982A-16H-3-W 43	144.63	162.75	162.6	5.30634	5.30634	2665	71	3.4257
162-982A-16H-3-W 44	144.64	162.76	162.61	5.30656	5.30656	2763	107	3.44138
162-982A-16H-3-W 46	144.66	162.78	162.63	5.30701	5.30701	2443	81	3.38792
162-982A-16H-3-W 49	144.69	162.81	162.66	5.30769	5.30769	2621	106	3.41847
162-982A-16H-3-W 50	144.7	162.82	162.67	5.30792	5.30792	2583	93	3.41212
162-982A-16H-3-W 52	144.72	162.84	162.69	5.30837	5.30837	2425	65	3.38471
162-982A-16H-3-W 53	144.73	162.85	162.7	5.30859	5.30859	2384	101	3.37731
162-982A-16H-3-W 56	144.76	162.88	162.73	5.30927	5.30927	2323	83	3.36605
162-982A-16H-3-W 58	144.78	162.9	162.75	5.30972	5.30972	2198	79	3.34203
162-982A-16H-3-W 60	144.8	162.92	162.77	5.31017	5.31017	2207	76	3.3438
162-982A-16H-3-W 63	144.83	162.95	162.8	5.31085	5.31085	2171	114	3.33666
162-982A-16H-3-W 64	144.84	162.96	162.81	5.31108	5.31108	2128	68	3.32797
162-982A-16H-3-W 66	144.86	162.98	162.83	5.31153	5.31153	2129	26	3.32818
162-982A-16H-3-W 67	144.87	162.99	162.84	5.31175	5.31175	2317	104	3.36493
162-982A-16H-3-W 70	144.9	163.02	162.87	5.31243	5.31243	2200	100	3.34242
162-982A-16H-3-W 71	144.91	163.03	162.88	5.31265	5.31265	2142	78	3.33082
162-982A-16H-3-W 74	144.94	163.06	162.91	5.31333	5.31333	2191	71	3.34064
162-982A-16H-3-W 75	144.95	163.07	162.92	5.31356	5.31356	2124	35	3.32715
162-982A-16H-3-W 78	144.98	163.1	162.95	5.31423	5.31423	2095	28	3.32118
162-982A-16H-3-W 79	144.99	163.11	162.96	5.31446	5.31446	2308	111	3.36324
162-982A-16H-3-W 82	145.02	163.14	162.99	5.31514	5.31514	2280	86	3.35793
162-982A-16H-3-W 85	145.05	163.17	163.02	5.31581	5.31581	2024	97	3.30621
162-982A-16H-3-W 86	145.06	163.18	163.03	5.31604	5.31604	2249	48	3.35199
162-982A-16H-3-W 88	145.08	163.2	163.05	5.31649	5.31649	2308	66	3.36324
162-982A-16H-3-W 89	145.09	163.21	163.06	5.31671	5.31671	2148	48	3.33203
162-982A-16H-3-W 92	145.12	163.24	163.09	5.31739	5.31739	2125	75	3.32736
162-982A-16H-3-W 94	145.14	163.26	163.11	5.31784	5.31784	2210	62	3.34439
[truncated: 5,505 more rows]

## Sheet: Site 982 XRF data Hole A
IODP ID	mbsf	mcd (shipboard)	rmcd (this study)	AgeD17MT (this study)	AgeD17FT (this study)	Silica (counts)	Zirconium (counts)	ln(Silica) (counts)
162-982A-12H-3-W 2	106.22	119.71	119.71	4.46702	4.46702	1889	83	3.27623
162-982A-12H-3-W 3	106.23	119.72	119.72	4.4673	4.4673	2063	47	3.3145
162-982A-12H-3-W 6	106.26	119.75	119.75	4.46812	4.46812	1989	52	3.29863
162-982A-12H-3-W 7	106.27	119.76	119.76	4.4684	4.4684	1970	57	3.29447
162-982A-12H-3-W 8	106.28	119.77	119.77	4.46868	4.46868	1986	152	3.29798
162-982A-12H-3-W 9	106.29	119.78	119.78	4.46895	4.46895	1919	58	3.28307
162-982A-12H-3-W 12	106.32	119.81	119.81	4.46978	4.46978	2166	108	3.33566
162-982A-12H-3-W 14	106.34	119.83	119.83	4.47033	4.47033	2085	67	3.31911
162-982A-12H-3-W 15	106.35	119.84	119.84	4.47061	4.47061	2300	31	3.36173
162-982A-12H-3-W 18	106.38	119.87	119.87	4.47143	4.47143	2222	27	3.34674
162-982A-12H-3-W 19	106.39	119.88	119.88	4.47171	4.47171	2073	56	3.3166
162-982A-12H-3-W 22	106.42	119.91	119.91	4.47253	4.47253	2270	85	3.35603
162-982A-12H-3-W 24	106.44	119.93	119.93	4.47309	4.47309	2357	95	3.37236
162-982A-12H-3-W 26	106.46	119.95	119.95	4.47364	4.47364	2367	102	3.3742
162-982A-12H-3-W 28.5	106.49	119.98	119.98	4.47446	4.47446	2457	82	3.39041
162-982A-12H-3-W 31	106.51	120	120	4.47502	4.47502	2236	43	3.34947
162-982A-12H-3-W 33	106.53	120.02	120.02	4.47557	4.47557	1975	33	3.29557
162-982A-12H-3-W 34	106.54	120.03	120.03	4.47584	4.47584	2056	23	3.31302
162-982A-12H-3-W 37	106.57	120.06	120.06	4.47667	4.47667	1800	25	3.25527
162-982A-12H-3-W 39	106.59	120.08	120.08	4.47722	4.47722	1910	64	3.28103
162-982A-12H-3-W 40	106.6	120.09	120.09	4.4775	4.4775	1625	72	3.21085
162-982A-12H-3-W 41	106.61	120.1	120.1	4.47777	4.47777	1261	124	3.10072
162-982A-12H-3-W 44	106.64	120.13	120.13	4.4786	4.4786	1456	15	3.16316
162-982A-12H-3-W 46	106.66	120.15	120.15	4.47915	4.47915	1671	90	3.22298
162-982A-12H-3-W 48.5	106.69	120.18	120.18	4.47998	4.47998	1345	81	3.12872
162-982A-12H-3-W 51	106.71	120.2	120.2	4.48053	4.48053	1371	35	3.13704
162-982A-12H-3-W 54	106.74	120.23	120.23	4.48135	4.48135	1328	161	3.1232
162-982A-12H-3-W 57	106.77	120.26	120.26	4.48218	4.48218	1282	99	3.10789
162-982A-12H-3-W 59	106.79	120.28	120.28	4.48273	4.48273	1194	72	3.077
162-982A-12H-3-W 60	106.8	120.29	120.29	4.48301	4.48301	1040	58	3.01703
162-982A-12H-3-W 62	106.82	120.31	120.31	4.48356	4.48356	1304	58	3.11528
162-982A-12H-3-W 64	106.84	120.33	120.33	4.48411	4.48411	1341	34	3.12743
162-982A-12H-3-W 65	106.85	120.34	120.34	4.48439	4.48439	1466	34	3.16613
162-982A-12H-3-W 67.5	106.88	120.37	120.37	4.48521	4.48521	1342	75	3.12775
162-982A-12H-3-W 70	106.9	120.39	120.39	4.48576	4.48576	1356	62	3.13226
162-982A-12H-3-W 72	106.92	120.41	120.41	4.48632	4.48632	1379	39	3.13956
162-982A-12H-3-W 73	106.93	120.42	120.42	4.48659	4.48659	1335	31	3.12548
162-982A-12H-3-W 77	106.97	120.46	120.46	4.48769	4.48769	1463	39	3.16524
162-982A-12H-3-W 79	106.99	120.48	120.48	4.48825	4.48825	1416	154	3.15106
162-982A-12H-3-W 81	107.01	120.5	120.5	4.4888	4.4888	1253	51	3.09795
162-982A-12H-3-W 82	107.02	120.51	120.51	4.48907	4.48907	1401	110	3.14644
162-982A-12H-3-W 84	107.04	120.53	120.53	4.48962	4.48962	1228	11	3.0892
162-982A-12H-3-W 90	107.1	120.59	120.59	4.49128	4.49128	1220	73	3.08636
162-982A-12H-3-W 91	107.11	120.6	120.6	4.49155	4.49155	1251	26	3.09726
162-982A-12H-3-W 92	107.12	120.61	120.61	4.49183	4.49183	1236	9	3.09202
162-982A-12H-3-W 93	107.13	120.62	120.62	4.4921	4.4921	1364	65	3.13481
162-982A-12H-3-W 95	107.15	120.64	120.64	4.49266	4.49266	1151	69	3.06108
162-982A-12H-3-W 100	107.2	120.69	120.69	4.49403	4.49403	1283	34	3.10823
162-982A-12H-3-W 102	107.22	120.71	120.71	4.49458	4.49458	1412	34	3.14983
162-982A-12H-3-W 103	107.23	120.72	120.72	4.49486	4.49486	1352	87	3.13098
162-982A-12H-3-W 105	107.25	120.74	120.74	4.49541	4.49541	1212	71	3.0835
162-982A-12H-3-W 109	107.29	120.78	120.78	4.49651	4.49651	1178	68	3.07115
162-982A-12H-3-W 110	107.3	120.79	120.79	4.49679	4.49679	1162	101	3.06521
162-982A-12H-3-W 112	107.32	120.81	120.81	4.49734	4.49734	1243	116	3.09447
162-982A-12H-3-W 114	107.34	120.83	120.83	4.49789	4.49789	1151	44	3.06108
162-982A-12H-3-W 119	107.39	120.88	120.88	4.49927	4.49927	1208	23	3.08207
162-982A-12H-3-W 120	107.4	120.89	120.89	4.49955	4.49955	1041	38	3.01745
162-982A-12H-3-W 122	107.42	120.91	120.91	4.5001	4.5001	1178	96	3.07115
162-982A-12H-3-W 123	107.43	120.92	120.92	4.50037	4.50037	1155	65	3.06258
162-982A-12H-3-W 125	107.45	120.94	120.94	4.50092	4.50092	1256	68	3.09899
162-982A-12H-3-W 128	107.48	120.97	120.97	4.50175	4.50175	1284	68	3.10857
162-982A-12H-3-W 130	107.5	120.99	120.99	4.5023	4.5023	1322	33	3.12123
162-982A-12H-3-W 131	107.51	121	121	4.50258	4.50258	1358	1	3.1329
162-982A-12H-3-W 132	107.52	121.01	121.01	4.50285	4.50285	1635	98	3.21352
162-982A-12H-3-W 134	107.54	121.03	121.03	4.50341	4.50341	1198	39	3.07846
162-982A-12H-3-W 136	107.56	121.05	121.05	4.50396	4.50396	1362	89	3.13418
162-982A-12H-3-W 138	107.58	121.07	121.07	4.50451	4.50451	1101	61	3.04179
162-982A-12H-3-W 140	107.6	121.09	121.09	4.50506	4.50506	1380	90	3.13988
162-982A-12H-3-W 142	107.62	121.11	121.11	4.50561	4.50561	1294	85	3.11193
162-982A-12H-3-W 145	107.65	121.14	121.14	4.50644	4.50644	1514	93	3.18013
162-982A-12H-3-W 146	107.66	121.15	121.15	4.50671	4.50671	1425	105	3.15381
162-982A-12H-3-W 149	107.69	121.18	121.18	4.50754	4.50754	1379	86	3.13956
162-982A-12H-4-W 2	107.72	121.21	121.21	4.50837	4.50837	1326	26	3.12254
162-982A-12H-4-W 8.5	107.79	121.28	121.28	4.5103	4.5103	1387	124	3.14208
162-982A-12H-4-W 10.5	107.81	121.3	121.3	4.51085	4.51085	1836	119	3.26387
162-982A-12H-4-W 12.5	107.83	121.32	121.32	4.5114	4.5114	1422	-5	3.1529
162-982A-12H-4-W 14	107.84	121.33	121.33	4.51167	4.51167	1516	66	3.1807
162-982A-12H-4-W 18	107.88	121.37	121.37	4.51278	4.51278	1380	48	3.13988
162-982A-12H-4-W 21	107.91	121.4	121.4	4.5136	4.5136	1515	100	3.18041
162-982A-12H-4-W 22	107.92	121.41	121.41	4.51388	4.51388	1462	34	3.16495
162-982A-12H-4-W 23	107.93	121.42	121.42	4.51415	4.51415	1413	73	3.15014
162-982A-12H-4-W 25	107.95	121.44	121.44	4.51471	4.51471	1535	90	3.18611
162-982A-12H-4-W 26	107.96	121.45	121.45	4.51498	4.51498	1423	48	3.1532
162-982A-12H-4-W 28	107.98	121.47	121.47	4.51553	4.51553	1389	51	3.1427
162-982A-12H-4-W 29	107.99	121.48	121.48	4.51581	4.51581	1468	110	3.16673
162-982A-12H-4-W 30	108	121.49	121.49	4.51608	4.51608	1332	92	3.1245
162-982A-12H-4-W 31	108.01	121.5	121.5	4.51636	4.51636	1479	65	3.16997
162-982A-12H-4-W 33	108.03	121.52	121.52	4.51691	4.51691	1239	31	3.09307
162-982A-12H-4-W 36	108.06	121.55	121.55	4.51774	4.51774	1392	98	3.14364
162-982A-12H-4-W 38	108.08	121.57	121.57	4.51829	4.51829	1166	87	3.0667
162-982A-12H-4-W 40	108.1	121.59	121.59	4.51884	4.51884	1263	110	3.1014
162-982A-12H-4-W 43	108.13	121.62	121.62	4.51967	4.51967	1101	39	3.04179
162-982A-12H-4-W 44	108.14	121.63	121.63	4.51994	4.51994	1014	-18	3.00604
162-982A-12H-4-W 46	108.16	121.65	121.65	4.52049	4.52049	1077	38	3.03222
162-982A-12H-4-W 48	108.18	121.67	121.67	4.52105	4.52105	1147	85	3.05956
162-982A-12H-4-W 51	108.21	121.7	121.7	4.52187	4.52187	1440	123	3.15836
162-982A-12H-4-W 52	108.22	121.71	121.71	4.52215	4.52215	1157	42	3.06333
162-982A-12H-4-W 56	108.26	121.75	121.75	4.52325	4.52325	1293	66	3.1116
162-982A-12H-4-W 59	108.29	121.78	121.78	4.52408	4.52408	1062	26	3.02612
162-982A-12H-4-W 60	108.3	121.79	121.79	4.52435	4.52435	1173	25	3.0693
162-982A-12H-4-W 61	108.31	121.8	121.8	4.52463	4.52463	1229	77	3.08955
162-982A-12H-4-W 63	108.33	121.82	121.82	4.52518	4.52518	1284	80	3.10857
162-982A-12H-4-W 65	108.35	121.84	121.84	4.52573	4.52573	1182	41	3.07262
162-982A-12H-4-W 68.5	108.39	121.88	121.88	4.52683	4.52683	1198	55	3.07846
162-982A-12H-4-W 69.5	108.4	121.89	121.89	4.52711	4.52711	1360	53	3.13354
162-982A-12H-4-W 71.5	108.42	121.91	121.91	4.52766	4.52766	1241	74	3.09377
162-982A-12H-4-W 74	108.44	121.93	121.93	4.52821	4.52821	1185	52	3.07372
162-982A-12H-4-W 75	108.45	121.94	121.94	4.52849	4.52849	1333	94	3.12483
162-982A-12H-4-W 78	108.48	121.97	121.97	4.52931	4.52931	1385	99	3.14145
162-982A-12H-4-W 79	108.49	121.98	121.98	4.52959	4.52959	1376	50	3.13862
162-982A-12H-4-W 81.5	108.52	122.01	122.01	4.53042	4.53042	1327	55	3.12287
162-982A-12H-4-W 84	108.54	122.03	122.03	4.53097	4.53097	1398	47	3.14551
162-982A-12H-4-W 89	108.59	122.08	122.08	4.53235	4.53235	1259	99	3.10003
162-982A-12H-4-W 90	108.6	122.09	122.09	4.53262	4.53262	1422	22	3.1529
162-982A-12H-4-W 92	108.62	122.11	122.11	4.53317	4.53317	1469	78	3.16702
162-982A-12H-4-W 93	108.63	122.12	122.12	4.53345	4.53345	1406	99	3.14799
162-982A-12H-4-W 97	108.67	122.16	122.16	4.53455	4.53455	1306	82	3.11594
162-982A-12H-4-W 98	108.68	122.17	122.17	4.53483	4.53483	1386	90	3.14176
162-982A-12H-4-W 100.5	108.71	122.2	122.2	4.53565	4.53565	1327	81	3.12287
162-982A-12H-4-W 101.5	108.72	122.21	122.21	4.53593	4.53593	1649	103	3.21722
162-982A-12H-4-W 103	108.73	122.22	122.22	4.53621	4.53621	1444	95	3.15957
162-982A-12H-4-W 104	108.74	122.23	122.23	4.53648	4.53648	1459	78	3.16406
162-982A-12H-4-W 105.5	108.76	122.25	122.25	4.53703	4.53703	1385	75	3.14145
162-982A-12H-4-W 108	108.78	122.27	122.27	4.53758	4.53758	1392	76	3.14364
162-982A-12H-4-W 110.5	108.81	122.3	122.3	4.53841	4.53841	1442	79	3.15897
162-982A-12H-4-W 111.5	108.82	122.31	122.31	4.53869	4.53869	1511	90	3.17926
162-982A-12H-4-W 113	108.83	122.32	122.32	4.53896	4.53896	1474	82	3.1685
162-982A-12H-4-W 119	108.89	122.38	122.38	4.54062	4.54062	1567	12	3.19507
162-982A-12H-4-W 120	108.9	122.39	122.39	4.54089	4.54089	1508	61	3.1784
162-982A-12H-4-W 121	108.91	122.4	122.4	4.54117	4.54117	1520	38	3.18184
162-982A-12H-4-W 122	108.92	122.41	122.41	4.54144	4.54144	1521	81	3.18213
162-982A-12H-4-W 124	108.94	122.43	122.43	4.54199	4.54199	1696	10	3.22943
162-982A-12H-4-W 125	108.95	122.44	122.44	4.54227	4.54227	1629	46	3.21192
162-982A-12H-4-W 128	108.98	122.47	122.47	4.5431	4.5431	1592	27	3.20194
162-982A-12H-4-W 131	109.01	122.5	122.5	4.54392	4.54392	1819	73	3.25983
162-982A-12H-4-W 132	109.02	122.51	122.51	4.5442	4.5442	1717	99	3.23477
162-982A-12H-4-W 133	109.03	122.52	122.52	4.54447	4.54447	1883	106	3.27485
162-982A-12H-4-W 136	109.06	122.55	122.55	4.5453	4.5453	1672	55	3.22324
162-982A-12H-4-W 140	109.1	122.59	122.59	4.5464	4.5464	2029	117	3.30728
162-982A-12H-4-W 142	109.12	122.61	122.61	4.54695	4.54695	2065	81	3.31492
162-982A-12H-4-W 143	109.13	122.62	122.62	4.54723	4.54723	2089	78	3.31994
162-982A-12H-5-W 2	109.22	122.71	122.71	4.54971	4.54971	1911	57	3.28126
162-982A-12H-5-W 3	109.23	122.72	122.72	4.54999	4.54999	1937	68	3.28713
162-982A-12H-5-W 6	109.26	122.75	122.75	4.55081	4.55081	1665	76	3.22141
162-982A-12H-5-W 9	109.29	122.78	122.78	4.55164	4.55164	1481	70	3.17056
162-982A-12H-5-W 10	109.3	122.79	122.79	4.55192	4.55192	1602	28	3.20466
162-982A-12H-5-W 11	109.31	122.8	122.8	4.55219	4.55219	1478	56	3.16967
162-982A-12H-5-W 13.5	109.34	122.83	122.83	4.55302	4.55302	1396	80	3.14489
162-982A-12H-5-W 16	109.36	122.85	122.85	4.55357	4.55357	1506	64	3.17782
162-982A-12H-5-W 18	109.38	122.87	122.87	4.55412	4.55412	1635	79	3.21352
162-982A-12H-5-W 20	109.4	122.89	122.89	4.55467	4.55467	1476	93	3.16909
162-982A-12H-5-W 22.5	109.43	122.92	122.92	4.5555	4.5555	1424	49	3.15351
162-982A-12H-5-W 24	109.44	122.93	122.93	4.55577	4.55577	1465	84	3.16584
162-982A-12H-5-W 26	109.46	122.95	122.95	4.55633	4.55633	1531	58	3.18498
162-982A-12H-5-W 27	109.47	122.96	122.96	4.5566	4.5566	1666	67	3.22167
162-982A-12H-5-W 29	109.49	122.98	122.98	4.55715	4.55715	1786	98	3.25188
162-982A-12H-5-W 32	109.52	123.01	123.01	4.55798	4.55798	1405	54	3.14768
162-982A-12H-5-W 34	109.54	123.03	123.03	4.55853	4.55853	1465	73	3.16584
162-982A-12H-5-W 35	109.55	123.04	123.04	4.55881	4.55881	1582	74	3.19921
162-982A-12H-5-W 39	109.59	123.08	123.08	4.55991	4.55991	1505	80	3.17754
162-982A-12H-5-W 40	109.6	123.09	123.09	4.56018	4.56018	1654	72	3.21854
162-982A-12H-5-W 41	109.61	123.1	123.1	4.56046	4.56046	1564	106	3.19424
162-982A-12H-5-W 42	109.62	123.11	123.11	4.56074	4.56074	1628	39	3.21165
162-982A-12H-5-W 43	109.63	123.12	123.12	4.56101	4.56101	1395	49	3.14457
162-982A-12H-5-W 45.5	109.66	123.15	123.15	4.56184	4.56184	1555	131	3.19173
162-982A-12H-5-W 48	109.68	123.17	123.17	4.56239	4.56239	1387	117	3.14208
162-982A-12H-5-W 50	109.7	123.19	123.19	4.56294	4.56294	1600	69	3.20412
162-982A-12H-5-W 53	109.73	123.22	123.22	4.56377	4.56377	1255	79	3.09864
162-982A-12H-5-W 54	109.74	123.23	123.23	4.56404	4.56404	1391	59	3.14333
162-982A-12H-5-W 55	109.75	123.24	123.24	4.56432	4.56432	1666	81	3.22167
162-982A-12H-5-W 58	109.78	123.27	123.27	4.56515	4.56515	1411	54	3.14953
162-982A-12H-5-W 59	109.79	123.28	123.28	4.56542	4.56542	1401	34	3.14644
162-982A-12H-5-W 62	109.82	123.31	123.31	4.56625	4.56625	1628	84	3.21165
162-982A-12H-5-W 65	109.85	123.34	123.34	4.56708	4.56708	1209	38	3.08243
162-982A-12H-5-W 66	109.86	123.35	123.35	4.56735	4.56735	1550	30	3.19033
162-982A-12H-5-W 67	109.87	123.36	123.36	4.56763	4.56763	1191	100	3.07591
162-982A-12H-5-W 70	109.9	123.39	123.39	4.56845	4.56845	1217	62	3.08529
162-982A-12H-5-W 71	109.91	123.4	123.4	4.56873	4.56873	1174	42	3.06967
162-982A-12H-5-W 73	109.93	123.42	123.42	4.56928	4.56928	960	33	2.98227
162-982A-12H-5-W 76	109.96	123.45	123.45	4.57011	4.57011	970	45	2.98677
162-982A-12H-5-W 77	109.97	123.46	123.46	4.57038	4.57038	924	64	2.96567
162-982A-12H-5-W 79	109.99	123.48	123.48	4.57093	4.57093	1282	69	3.10789
162-982A-12H-5-W 82	110.02	123.51	123.51	4.57176	4.57176	1315	73	3.11893
162-982A-12H-5-W 83	110.03	123.52	123.52	4.57204	4.57204	1391	66	3.14333
162-982A-12H-5-W 85.5	110.06	123.55	123.55	4.57286	4.57286	1232	81	3.09061
162-982A-12H-5-W 89	110.09	123.58	123.58	4.57369	4.57369	1326	72	3.12254
162-982A-12H-5-W 90	110.1	123.59	123.59	4.57397	4.57397	1570	24	3.1959
162-982A-12H-5-W 92	110.12	123.61	123.61	4.57452	4.57452	1700	88	3.23045
162-982A-12H-5-W 94.5	110.15	123.64	123.64	4.57534	4.57534	1668	60	3.2222
162-982A-12H-5-W 97	110.17	123.66	123.66	4.5759	4.5759	1786	74	3.25188
162-982A-12H-5-W 98	110.18	123.67	123.67	4.57617	4.57617	1545	97	3.18893
162-982A-12H-5-W 100	110.2	123.69	123.69	4.57672	4.57672	1782	92	3.25091
162-982A-12H-5-W 101	110.21	123.7	123.7	4.577	4.577	1764	64	3.2465
162-982A-12H-5-W 106	110.26	123.75	123.75	4.57838	4.57838	1851	55	3.26741
162-982A-12H-5-W 108	110.28	123.77	123.77	4.57893	4.57893	2036	58	3.30878
162-982A-12H-5-W 109	110.29	123.78	123.78	4.5792	4.5792	1987	71	3.2982
162-982A-12H-5-W 112	110.32	123.81	123.81	4.58003	4.58003	2097	57	3.3216
162-982A-12H-5-W 113	110.33	123.82	123.82	4.58031	4.58031	2060	55	3.31387
162-982A-12H-5-W 116	110.36	123.85	123.85	4.58113	4.58113	2257	16	3.35353
162-982A-12H-5-W 118	110.38	123.87	123.87	4.58168	4.58168	2239	64	3.35005
162-982A-12H-5-W 119	110.39	123.88	123.88	4.58196	4.58196	2285	71	3.35889
162-982A-12H-5-W 123	110.43	123.92	123.92	4.58306	4.58306	2353	60	3.37162
162-982A-12H-5-W 124	110.44	123.93	123.93	4.58334	4.58334	2502	99	3.39829
162-982A-12H-5-W 126	110.46	123.95	123.95	4.58389	4.58389	2280	90	3.35793
162-982A-12H-5-W 127	110.47	123.96	123.96	4.58416	4.58416	2424	122	3.38453
162-982A-12H-5-W 128	110.48	123.97	123.97	4.58444	4.58444	2320	66	3.36549
162-982A-12H-5-W 130	110.5	123.99	123.99	4.58499	4.58499	2389	51	3.37822
162-982A-12H-5-W 131	110.51	124	124	4.58527	4.58527	2175	85	3.33746
162-982A-12H-5-W 132	110.52	124.01	124.01	4.58554	4.58554	2216	91	3.34557
162-982A-12H-5-W 134	110.54	124.03	124.03	4.58609	4.58609	2089	56	3.31994
162-982A-12H-5-W 135	110.55	124.04	124.04	4.58637	4.58637	2005	42	3.30211
162-982A-12H-5-W 138	110.58	124.07	124.07	4.5872	4.5872	2025	55	3.30643
162-982A-12H-5-W 140	110.6	124.09	124.09	4.58775	4.58775	1817	68	3.25935
162-982A-12H-5-W 141	110.61	124.1	124.1	4.58802	4.58802	1934	114	3.28646
162-982A-12H-5-W 144	110.64	124.13	124.13	4.58885	4.58885	1885	33	3.27531
162-982A-12H-5-W 146	110.66	124.15	124.15	4.5894	4.5894	1937	100	3.28713
162-982A-13H-1-W 4	112.74	127.56	127.66	4.68339	4.68339	1833	34	3.26316
162-982A-13H-1-W 6	112.76	127.58	127.68	4.68394	4.68394	1653	80	3.21827
162-982A-13H-1-W 8	112.78	127.6	127.7	4.68449	4.68449	1705	128	3.23172
162-982A-13H-1-W 10	112.8	127.62	127.72	4.68505	4.68505	1638	73	3.21431
162-982A-13H-1-W 12	112.82	127.64	127.74	4.6856	4.6856	2030	82	3.3075
162-982A-13H-1-W 14	112.84	127.66	127.76	4.68615	4.68615	1831	68	3.26269
162-982A-13H-1-W 15	112.85	127.67	127.77	4.68642	4.68642	1856	98	3.26858
162-982A-13H-1-W 19	112.89	127.71	127.81	4.68753	4.68753	1632	80	3.21272
162-982A-13H-1-W 20	112.9	127.72	127.82	4.6878	4.6878	1887	66	3.27577
162-982A-13H-1-W 22	112.92	127.74	127.84	4.68835	4.68835	1820	55	3.26007
162-982A-13H-1-W 25	112.95	127.77	127.87	4.68918	4.68918	1672	49	3.22324
162-982A-13H-1-W 26	112.96	127.78	127.88	4.68946	4.68946	1987	74	3.2982
162-982A-13H-1-W 28	112.98	127.8	127.9	4.69001	4.69001	1728	81	3.23754
162-982A-13H-1-W 31	113.01	127.83	127.93	4.69083	4.69083	1553	28	3.19117
162-982A-13H-1-W 32	113.02	127.84	127.94	4.69111	4.69111	1605	105	3.20548
162-982A-13H-1-W 33	113.03	127.85	127.95	4.69138	4.69138	2020	109	3.30535
162-982A-13H-1-W 35	113.05	127.87	127.97	4.69194	4.69194	1891	107	3.27669
162-982A-13H-1-W 36	113.06	127.88	127.98	4.69221	4.69221	1830	44	3.26245
162-982A-13H-1-W 38	113.08	127.9	128	4.69276	4.69276	1890	64	3.27646
162-982A-13H-1-W 42	113.12	127.94	128.04	4.69387	4.69387	1760	90	3.24551
162-982A-13H-1-W 44	113.14	127.96	128.06	4.69442	4.69442	1802	95	3.25575
162-982A-13H-1-W 45	113.15	127.97	128.07	4.69469	4.69469	1777	52	3.24969
162-982A-13H-1-W 48	113.18	128	128.1	4.69552	4.69552	1729	80	3.23779
162-982A-13H-1-W 50	113.2	128.02	128.12	4.69607	4.69607	1724	55	3.23654
162-982A-13H-1-W 52	113.22	128.04	128.14	4.69662	4.69662	1585	88	3.20003
162-982A-13H-1-W 54	113.24	128.06	128.16	4.69717	4.69717	1832	42	3.26293
162-982A-13H-1-W 56	113.26	128.08	128.18	4.69772	4.69772	1919	78	3.28307
162-982A-13H-1-W 59	113.29	128.11	128.21	4.69834	4.69837	2065	102	3.31492
162-982A-13H-1-W 60	113.3	128.12	128.22	4.69851	4.69856	1711	34	3.23325
162-982A-13H-1-W 62	113.32	128.14	128.24	4.69885	4.69893	1849	63	3.26694
162-982A-13H-1-W 63	113.33	128.15	128.25	4.69902	4.69912	1917	73	3.28262
162-982A-13H-1-W 67.5	113.38	128.2	128.3	4.69987	4.70005	2050	54	3.31175
162-982A-13H-1-W 70	113.4	128.22	128.32	4.70021	4.70042	1767	66	3.24724
162-982A-13H-1-W 72	113.42	128.24	128.34	4.70055	4.70079	1999	36	3.30081
162-982A-13H-1-W 74	113.44	128.26	128.36	4.70089	4.70117	1989	95	3.29863
162-982A-13H-1-W 76	113.46	128.28	128.38	4.70123	4.70154	1926	79	3.28466
162-982A-13H-1-W 77	113.47	128.29	128.39	4.7014	4.70172	2006	-1	3.30233
162-982A-13H-1-W 80	113.5	128.32	128.42	4.70191	4.70228	2055	61	3.31281
162-982A-13H-1-W 83	113.53	128.35	128.45	4.70242	4.70284	2102	72	3.32263
162-982A-13H-1-W 84	113.54	128.36	128.46	4.70259	4.70303	1919	73	3.28307
162-982A-13H-1-W 86	113.56	128.38	128.48	4.70293	4.7034	1891	85	3.27669
162-982A-13H-1-W 87	113.57	128.39	128.49	4.7031	4.70359	2023	55	3.306
162-982A-13H-1-W 90	113.6	128.42	128.52	4.70361	4.70414	2070	97	3.31597
162-982A-13H-1-W 93	113.63	128.45	128.55	4.70412	4.7047	1988	53	3.29842
162-982A-13H-1-W 94	113.64	128.46	128.56	4.70429	4.70489	1851	34	3.26741
162-982A-13H-1-W 96	113.66	128.48	128.58	4.70463	4.70526	1814	49	3.25864
162-982A-13H-1-W 97	113.67	128.49	128.59	4.7048	4.70545	1706	19	3.23198
162-982A-13H-1-W 101	113.71	128.53	128.63	4.70548	4.70619	1550	125	3.19033
162-982A-13H-1-W 102	113.72	128.54	128.64	4.70565	4.70638	1598	85	3.20358
162-982A-13H-1-W 104	113.74	128.56	128.66	4.70599	4.70675	1695	53	3.22917
162-982A-13H-1-W 106	113.76	128.58	128.68	4.70633	4.70712	1352	83	3.13098
162-982A-13H-1-W 109	113.79	128.61	128.71	4.70684	4.70768	1552	45	3.19089
162-982A-13H-1-W 110	113.8	128.62	128.72	4.70701	4.70787	1694	66	3.22891
162-982A-13H-1-W 112	113.82	128.64	128.74	4.70735	4.70824	1543	90	3.18837
162-982A-13H-1-W 114	113.84	128.66	128.76	4.70769	4.70861	1528	11	3.18412
162-982A-13H-1-W 116	113.86	128.68	128.78	4.70803	4.70899	1573	39	3.19673
162-982A-13H-1-W 117	113.87	128.69	128.79	4.7082	4.70917	1541	60	3.1878
162-982A-13H-1-W 120	113.9	128.72	128.82	4.70871	4.70973	1733	94	3.2388
162-982A-13H-1-W 122	113.92	128.74	128.84	4.70906	4.7101	1701	66	3.2307
162-982A-13H-1-W 124	113.94	128.76	128.86	4.7094	4.71047	1435	63	3.15685
162-982A-13H-1-W 127	113.97	128.79	128.89	4.70991	4.71103	1626	99	3.21112
162-982A-13H-1-W 128	113.98	128.8	128.9	4.71008	4.71122	1636	78	3.21378
162-982A-13H-1-W 130	114	128.82	128.92	4.71042	4.71159	1675	117	3.22401
162-982A-13H-1-W 132	114.02	128.84	128.94	4.71076	4.71196	1465	95	3.16584
162-982A-13H-1-W 133	114.03	128.85	128.95	4.71093	4.71215	1780	63	3.25042
162-982A-13H-1-W 136	114.06	128.88	128.98	4.71144	4.71271	1409	67	3.14891
162-982A-13H-1-W 138	114.08	128.9	129	4.71178	4.71308	1577	49	3.19783
162-982A-13H-1-W 140	114.1	128.92	129.02	4.71212	4.71345	1519	60	3.18156
162-982A-13H-1-W 142	114.12	128.94	129.04	4.71246	4.71383	1439	78	3.15806
162-982A-13H-1-W 144	114.14	128.96	129.06	4.7128	4.7142	1414	81	3.15045
162-982A-13H-1-W 146	114.16	128.98	129.08	4.71314	4.71457	1606	99	3.20575
162-982A-13H-1-W 148	114.18	129	129.1	4.71348	4.71494	1523	106	3.1827
162-982A-13H-2-W 3	114.23	129.05	129.15	4.71433	4.71587	1686	111	3.22686
162-982A-13H-2-W 4	114.24	129.06	129.16	4.7145	4.71606	1496	65	3.17493
162-982A-13H-2-W 6	114.26	129.08	129.18	4.71484	4.71643	1548	31	3.18977
162-982A-13H-2-W 8	114.28	129.1	129.2	4.71518	4.71681	1623	40	3.21032
162-982A-13H-2-W 9	114.29	129.11	129.21	4.71535	4.71699	1424	49	3.15351
162-982A-13H-2-W 11.5	114.32	129.14	129.24	4.71586	4.71755	1677	94	3.22453
162-982A-13H-2-W 14	114.34	129.16	129.26	4.7162	4.71792	1667	74	3.22194
162-982A-13H-2-W 16	114.36	129.18	129.28	4.71654	4.71829	1871	58	3.27207
162-982A-13H-2-W 18	114.38	129.2	129.3	4.71688	4.71867	2029	53	3.30728
162-982A-13H-2-W 20	114.4	129.22	129.32	4.71722	4.71904	1582	49	3.19921
162-982A-13H-2-W 22	114.42	129.24	129.34	4.71756	4.71941	1824	67	3.26102
162-982A-13H-2-W 24	114.44	129.26	129.36	4.7179	4.71978	1778	33	3.24993
162-982A-13H-2-W 25	114.45	129.27	129.37	4.71807	4.71997	1815	83	3.25888
162-982A-13H-2-W 28	114.48	129.3	129.4	4.71858	4.72053	2008	22	3.30276
162-982A-13H-2-W 29	114.49	129.31	129.41	4.71875	4.72072	1805	80	3.25648
162-982A-13H-2-W 30	114.5	129.32	129.42	4.71892	4.7209	1880	124	3.27416
162-982A-13H-2-W 32	114.52	129.34	129.44	4.71926	4.72127	1811	41	3.25792
162-982A-13H-2-W 34	114.54	129.36	129.46	4.7196	4.72165	1689	48	3.22763
162-982A-13H-2-W 36	114.56	129.38	129.48	4.71994	4.72202	1613	50	3.20763
162-982A-13H-2-W 38	114.58	129.4	129.5	4.72028	4.72239	1804	44	3.25624
162-982A-13H-2-W 40	114.6	129.42	129.52	4.72062	4.72276	2216	63	3.34557
162-982A-13H-2-W 42	114.62	129.44	129.54	4.72096	4.72314	2079	71	3.31785
162-982A-13H-2-W 44	114.64	129.46	129.56	4.7213	4.72351	2256	58	3.35334
162-982A-13H-2-W 48	114.68	129.5	129.6	4.72198	4.72425	2072	90	3.31639
162-982A-13H-2-W 49	114.69	129.51	129.61	4.72215	4.72444	2046	83	3.31091
162-982A-13H-2-W 50	114.7	129.52	129.62	4.72232	4.72463	2373	80	3.3753
162-982A-13H-2-W 52	114.72	129.54	129.64	4.72266	4.725	2379	63	3.37639
162-982A-13H-2-W 53	114.73	129.55	129.65	4.72283	4.72518	2541	102	3.405
162-982A-13H-2-W 56	114.76	129.58	129.68	4.72334	4.72574	2545	99	3.40569
162-982A-13H-2-W 59	114.79	129.61	129.71	4.72385	4.7263	2478	84	3.3941
162-982A-13H-2-W 60	114.8	129.62	129.72	4.72402	4.72649	2805	111	3.44793
162-982A-13H-2-W 61	114.81	129.63	129.73	4.72419	4.72667	2599	95	3.41481
162-982A-13H-2-W 64	114.84	129.66	129.76	4.7247	4.72723	2737	91	3.43727
162-982A-13H-2-W 66	114.86	129.68	129.78	4.72504	4.7276	2693	57	3.43024
162-982A-13H-2-W 68.5	114.89	129.71	129.81	4.72555	4.72816	2650	41	3.42325
162-982A-13H-2-W 71	114.91	129.73	129.83	4.72589	4.72854	2528	36	3.40278
162-982A-13H-2-W 72	114.92	129.74	129.84	4.72606	4.72872	2811	151	3.44886
162-982A-13H-2-W 73	114.93	129.75	129.85	4.72623	4.72891	2696	80	3.43072
162-982A-13H-2-W 75.5	114.96	129.78	129.88	4.72674	4.72947	2827	82	3.45133
162-982A-13H-2-W 78	114.98	129.8	129.9	4.72708	4.72984	2776	107	3.44342
162-982A-13H-2-W 80	115	129.82	129.92	4.72742	4.73021	2975	53	3.47349
162-982A-13H-2-W 82	115.02	129.84	129.94	4.72776	4.73058	2684	80	3.42878
162-982A-13H-2-W 83	115.03	129.85	129.95	4.72793	4.73077	2718	100	3.43425
162-982A-13H-2-W 84	115.04	129.86	129.96	4.7281	4.73096	2735	93	3.43696
162-982A-13H-2-W 88	115.08	129.9	130	4.72878	4.7317	2070	114	3.31597
162-982A-13H-2-W 91	115.11	129.93	130.03	4.72929	4.73226	2109	59	3.32408
162-982A-13H-2-W 92	115.12	129.94	130.04	4.72946	4.73245	2168	73	3.33606
162-982A-13H-2-W 94	115.14	129.96	130.06	4.7298	4.73282	2305	86	3.36267
162-982A-13H-2-W 98	115.18	130	130.1	4.73049	4.73356	1860	69	3.26951
162-982A-13H-2-W 100	115.2	130.02	130.12	4.73083	4.73394	2044	67	3.31048
162-982A-13H-2-W 102	115.22	130.04	130.14	4.73117	4.73431	1804	56	3.25624
162-982A-13H-2-W 104	115.24	130.06	130.16	4.73151	4.73468	1774	47	3.24895
162-982A-13H-2-W 107	115.27	130.09	130.19	4.73202	4.73524	2004	113	3.3019
162-982A-13H-2-W 109	115.29	130.11	130.21	4.73236	4.73561	1870	135	3.27184
162-982A-13H-2-W 110	115.3	130.12	130.22	4.73253	4.7358	1694	94	3.22891
162-982A-13H-2-W 112	115.32	130.14	130.24	4.73287	4.73617	1791	63	3.2531
162-982A-13H-2-W 114	115.34	130.16	130.26	4.73321	4.73654	1468	34	3.16673
162-982A-13H-2-W 120	115.4	130.22	130.32	4.73423	4.73766	1625	57	3.21085
162-982A-13H-2-W 122	115.42	130.24	130.34	4.73457	4.73803	1709	47	3.23274
162-982A-13H-2-W 124	115.44	130.26	130.36	4.73491	4.7384	1797	10	3.25455
162-982A-13H-2-W 126	115.46	130.28	130.38	4.73525	4.73878	1716	51	3.23452
162-982A-13H-2-W 129	115.49	130.31	130.41	4.73576	4.73933	1906	76	3.28012
162-982A-13H-2-W 130	115.5	130.32	130.42	4.73593	4.73952	1554	78	3.19145
162-982A-13H-2-W 132	115.52	130.34	130.44	4.73627	4.73989	1586	17	3.2003
162-982A-13H-2-W 133	115.53	130.35	130.45	4.73644	4.74008	1827	100	3.26174
162-982A-13H-2-W 136	115.56	130.38	130.48	4.73695	4.74064	1684	15	3.22634
162-982A-13H-2-W 138	115.58	130.4	130.5	4.73729	4.74101	1573	81	3.19673
162-982A-13H-2-W 140	115.6	130.42	130.52	4.73763	4.74138	1600	41	3.20412
162-982A-13H-2-W 142	115.62	130.44	130.54	4.73797	4.74176	1370	-3	3.13672
162-982A-13H-2-W 144	115.64	130.46	130.56	4.73831	4.74213	1679	48	3.22505
162-982A-13H-2-W 146	115.66	130.48	130.58	4.73865	4.7425	1747	75	3.24229
162-982A-13H-2-W 148	115.68	130.5	130.6	4.73899	4.74287	1400	69	3.14613
162-982A-13H-3-W 4	115.74	130.56	130.66	4.74001	4.74399	1989	3	3.29863
162-982A-13H-3-W 5	115.75	130.57	130.67	4.74018	4.74418	1617	78	3.20871
162-982A-13H-3-W 7.5	115.78	130.6	130.7	4.74069	4.74473	1261	30	3.10072
162-982A-13H-3-W 10	115.8	130.62	130.72	4.74103	4.74511	1571	78	3.19618
162-982A-13H-3-W 13	115.83	130.65	130.75	4.74154	4.74567	1422	63	3.1529
162-982A-13H-3-W 14	115.84	130.66	130.76	4.74171	4.74585	1545	63	3.18893
162-982A-13H-3-W 16.5	115.87	130.69	130.79	4.74222	4.74641	1561	-9	3.1934
162-982A-13H-3-W 19	115.89	130.71	130.81	4.74256	4.74678	1656	48	3.21906
162-982A-13H-3-W 20	115.9	130.72	130.82	4.74273	4.74697	1487	74	3.17231
162-982A-13H-3-W 23	115.93	130.75	130.85	4.74324	4.74753	1513	101	3.17984
162-982A-13H-3-W 24	115.94	130.76	130.86	4.74341	4.74771	1493	46	3.17406
162-982A-13H-3-W 27	115.97	130.79	130.89	4.74392	4.74827	1542	93	3.18808
162-982A-13H-3-W 28	115.98	130.8	130.9	4.74409	4.74846	1371	105	3.13704
162-982A-13H-3-W 31	116.01	130.83	130.93	4.7446	4.74902	1327	82	3.12287
162-982A-13H-3-W 32	116.02	130.84	130.94	4.74477	4.7492	1516	79	3.1807
162-982A-13H-3-W 34	116.04	130.86	130.96	4.74511	4.74958	1387	55	3.14208
162-982A-13H-3-W 36.5	116.07	130.89	130.99	4.74562	4.75013	1309	73	3.11694
162-982A-13H-3-W 38.5	116.09	130.91	131.01	4.74596	4.75051	1555	79	3.19173
162-982A-13H-3-W 41	116.11	130.93	131.03	4.7463	4.75088	1156	64	3.06296
162-982A-13H-3-W 42	116.12	130.94	131.04	4.74647	4.75106	1504	100	3.17725
162-982A-13H-3-W 44	116.14	130.96	131.06	4.74681	4.75144	1812	7	3.25816
162-982A-13H-3-W 46.5	116.17	130.99	131.09	4.74732	4.752	1590	81	3.2014
162-982A-13H-3-W 48.5	116.19	131.01	131.11	4.74766	4.75237	1371	79	3.13704
162-982A-13H-3-W 51	116.21	131.03	131.13	4.748	4.75274	1639	62	3.21458
162-982A-13H-3-W 52	116.22	131.04	131.14	4.74817	4.75293	1783	63	3.25115
162-982A-13H-3-W 54	116.24	131.06	131.16	4.74851	4.7533	1550	70	3.19033
162-982A-13H-3-W 56	116.26	131.08	131.18	4.74885	4.75367	1769	46	3.24773
162-982A-13H-3-W 58	116.28	131.1	131.2	4.74919	4.75404	1823	71	3.26079
162-982A-13H-3-W 61	116.31	131.13	131.23	4.7497	4.7546	1768	88	3.24748
162-982A-13H-3-W 62	116.32	131.14	131.24	4.74987	4.75479	1907	63	3.28035
162-982A-13H-3-W 64	116.34	131.16	131.26	4.75021	4.75516	1928	71	3.28511
162-982A-13H-3-W 66	116.36	131.18	131.28	4.75055	4.75553	1858	60	3.26905
162-982A-13H-3-W 68.5	116.39	131.21	131.31	4.75106	4.75609	1491	66	3.17348
162-982A-13H-3-W 70.5	116.41	131.23	131.33	4.7514	4.75646	1828	40	3.26198
162-982A-13H-3-W 73	116.43	131.25	131.35	4.75174	4.75684	1712	46	3.2335
162-982A-13H-3-W 74	116.44	131.26	131.36	4.75191	4.75702	1660	76	3.22011
162-982A-13H-3-W 75	116.45	131.27	131.37	4.75209	4.75721	1766	37	3.24699
162-982A-13H-3-W 78	116.48	131.3	131.4	4.7526	4.75777	1689	61	3.22763
162-982A-13H-3-W 80	116.5	131.32	131.42	4.75294	4.75814	1686	59	3.22686
162-982A-13H-3-W 82	116.52	131.34	131.44	4.75328	4.75851	1568	45	3.19535
162-982A-13H-3-W 84	116.54	131.36	131.46	4.75362	4.75888	1655	73	3.2188
162-982A-13H-3-W 86	116.56	131.38	131.48	4.75396	4.75926	1515	62	3.18041
162-982A-13H-3-W 90	116.6	131.42	131.52	4.75464	4.76	1545	55	3.18893
162-982A-13H-3-W 92	116.62	131.44	131.54	4.75498	4.76037	1776	68	3.24944
162-982A-13H-3-W 93	116.63	131.45	131.55	4.75515	4.76056	1665	68	3.22141
162-982A-13H-3-W 96	116.66	131.48	131.58	4.75566	4.76112	1497	73	3.17522
162-982A-13H-3-W 98	116.68	131.5	131.6	4.756	4.76149	1637	68	3.21405
162-982A-13H-3-W 99	116.69	131.51	131.61	4.75617	4.76168	1774	56	3.24895
162-982A-13H-3-W 100	116.7	131.52	131.62	4.75634	4.76186	1849	90	3.26694
162-982A-13H-3-W 102	116.72	131.54	131.64	4.75668	4.76224	1708	61	3.23249
162-982A-13H-3-W 104	116.74	131.56	131.66	4.75702	4.76261	1492	81	3.17377
162-982A-13H-3-W 105	116.75	131.57	131.67	4.75719	4.76279	1468	32	3.16673
162-982A-13H-3-W 109	116.79	131.61	131.71	4.75787	4.76354	1651	39	3.21775
162-982A-13H-3-W 110	116.8	131.62	131.72	4.75804	4.76373	1892	40	3.27692
162-982A-13H-3-W 112	116.82	131.64	131.74	4.75838	4.7641	1952	90	3.29048
162-982A-13H-3-W 114	116.84	131.66	131.76	4.75872	4.76447	1907	86	3.28035
162-982A-13H-3-W 115	116.85	131.67	131.77	4.75889	4.76466	1972	92	3.29491
162-982A-13H-3-W 118	116.88	131.7	131.8	4.7594	4.76522	1775	42	3.2492
162-982A-13H-3-W 120	116.9	131.72	131.82	4.75974	4.76559	1858	54	3.26905
162-982A-13H-3-W 122	116.92	131.74	131.84	4.76008	4.76596	2044	62	3.31048
162-982A-13H-3-W 123	116.93	131.75	131.85	4.76025	4.76615	1848	44	3.2667
162-982A-13H-3-W 126	116.96	131.78	131.88	4.76076	4.76671	1643	69	3.21564
162-982A-13H-3-W 128	116.98	131.8	131.9	4.7611	4.76708	1790	48	3.25285
162-982A-13H-3-W 129	116.99	131.81	131.91	4.76127	4.76726	1922	59	3.28375
162-982A-13H-3-W 132	117.02	131.84	131.94	4.76178	4.76782	1792	56	3.25334
162-982A-13H-3-W 134	117.04	131.86	131.96	4.76212	4.76819	1965	38	3.29336
162-982A-13H-3-W 135	117.05	131.87	131.97	4.76229	4.76838	1969	46	3.29425
162-982A-13H-3-W 139	117.09	131.91	132.01	4.76297	4.76913	2048	58	3.31133
162-982A-13H-3-W 140	117.1	131.92	132.02	4.76314	4.76931	1945	46	3.28892
162-982A-13H-3-W 142	117.12	131.94	132.04	4.76348	4.76968	1824	123	3.26102
162-982A-13H-3-W 143	117.13	131.95	132.05	4.76365	4.76987	2005	38	3.30211
162-982A-13H-3-W 146	117.16	131.98	132.08	4.76416	4.77043	2255	58	3.35315
162-982A-13H-3-W 148.5	117.19	132.01	132.11	4.76467	4.77099	1976	43	3.29579
162-982A-13H-4-W 2	117.22	132.04	132.14	4.76518	4.77155	2478	31	3.3941
162-982A-13H-4-W 4	117.24	132.06	132.16	4.76552	4.77192	2415	62	3.38292
162-982A-13H-4-W 6	117.26	132.08	132.18	4.76586	4.77229	2480	77	3.39445
162-982A-13H-4-W 9	117.29	132.11	132.21	4.76637	4.77285	2635	59	3.42078
162-982A-13H-4-W 10	117.3	132.12	132.22	4.76654	4.77304	2502	117	3.39829
162-982A-13H-4-W 12	117.32	132.14	132.24	4.76688	4.77341	2416	50	3.3831
162-982A-13H-4-W 13	117.33	132.15	132.25	4.76705	4.77359	2673	94	3.427
162-982A-13H-4-W 16	117.36	132.18	132.28	4.76756	4.77415	2404	41	3.38093
162-982A-13H-4-W 19	117.39	132.21	132.31	4.76807	4.77471	3139	58	3.49679
162-982A-13H-4-W 20	117.4	132.22	132.32	4.76824	4.7749	3009	88	3.47842
162-982A-13H-4-W 21	117.41	132.23	132.33	4.76841	4.77508	3291	95	3.51733
162-982A-13H-4-W 23.5	117.44	132.26	132.36	4.76892	4.77564	3019	5	3.47986
162-982A-13H-4-W 26.5	117.47	132.29	132.39	4.76943	4.7762	2848	37	3.45454
162-982A-13H-4-W 28	117.48	132.3	132.4	4.7696	4.77639	3101	125	3.4915
162-982A-13H-4-W 30	117.5	132.32	132.42	4.76994	4.77676	2706	63	3.43233
162-982A-13H-4-W 32	117.52	132.34	132.44	4.77028	4.77713	2671	71	3.42667
162-982A-13H-4-W 33	117.53	132.35	132.45	4.77045	4.77732	2925	28	3.46613
162-982A-13H-4-W 35.5	117.56	132.38	132.48	4.77096	4.77788	2433	12	3.38614
162-982A-13H-4-W 39	117.59	132.41	132.51	4.77147	4.77844	2632	74	3.42029
162-982A-13H-4-W 40	117.6	132.42	132.52	4.77164	4.77862	2418	31	3.38346
162-982A-13H-4-W 42	117.62	132.44	132.54	4.77198	4.77899	2354	53	3.37181
162-982A-13H-4-W 44	117.64	132.46	132.56	4.77232	4.77937	2147	56	3.33183
162-982A-13H-4-W 46	117.66	132.48	132.58	4.77266	4.77974	1862	90	3.26998
162-982A-13H-4-W 48	117.68	132.5	132.6	4.773	4.78011	1912	93	3.28149
162-982A-13H-4-W 49	117.69	132.51	132.61	4.77317	4.7803	1870	43	3.27184
162-982A-13H-4-W 50	117.7	132.52	132.62	4.77334	4.78048	2112	83	3.32469
162-982A-13H-4-W 52	117.72	132.54	132.64	4.77369	4.78086	1917	86	3.28262
162-982A-13H-4-W 54	117.74	132.56	132.66	4.77403	4.78123	1605	106	3.20548
162-982A-13H-4-W 57	117.77	132.59	132.69	4.77454	4.78179	1641	50	3.21511
162-982A-13H-4-W 58	117.78	132.6	132.7	4.77471	4.78197	1875	59	3.273
162-982A-13H-4-W 60	117.8	132.62	132.72	4.77505	4.78235	1429	50	3.15503
162-982A-13H-4-W 62	117.82	132.64	132.74	4.77539	4.78272	1633	24	3.21299
162-982A-13H-4-W 64	117.84	132.66	132.76	4.77573	4.78309	1626	60	3.21112
162-982A-13H-4-W 65	117.85	132.67	132.77	4.7759	4.78328	1655	81	3.2188
162-982A-13H-4-W 67	117.87	132.69	132.79	4.77624	4.78365	1756	78	3.24452
162-982A-13H-4-W 68	117.88	132.7	132.8	4.77641	4.78383	1758	57	3.24502
162-982A-13H-4-W 69	117.89	132.71	132.81	4.77658	4.78402	1599	44	3.20385
162-982A-13H-4-W 71	117.91	132.73	132.83	4.77692	4.78439	1574	98	3.197
162-982A-13H-4-W 72	117.92	132.74	132.84	4.77709	4.78458	1613	78	3.20763
162-982A-13H-4-W 73	117.93	132.75	132.85	4.77726	4.78477	1683	59	3.22608
162-982A-13H-4-W 76	117.96	132.78	132.88	4.77777	4.78532	1582	74	3.19921
162-982A-13H-4-W 78	117.98	132.8	132.9	4.77811	4.7857	1438	-9	3.15776
162-982A-13H-4-W 79	117.99	132.81	132.91	4.77828	4.78588	1384	72	3.14114
162-982A-13H-4-W 80	118	132.82	132.92	4.77845	4.78607	1491	68	3.17348
162-982A-13H-4-W 82	118.02	132.84	132.94	4.77879	4.78644	1426	30	3.15412
162-982A-13H-4-W 84	118.04	132.86	132.96	4.77913	4.78681	1627	81	3.21139
162-982A-13H-4-W 87	118.07	132.89	132.99	4.77964	4.78737	1530	15	3.18469
162-982A-13H-4-W 88	118.08	132.9	133	4.77981	4.78756	1480	88	3.17026
162-982A-13H-4-W 90	118.1	132.92	133.02	4.78015	4.78793	1573	69	3.19673
162-982A-13H-4-W 91	118.11	132.93	133.03	4.78032	4.78812	1477	68	3.16938
162-982A-13H-4-W 93.5	118.14	132.96	133.06	4.78083	4.78868	1371	72	3.13704
162-982A-13H-4-W 97	118.17	132.99	133.09	4.78134	4.78923	1535	80	3.18611
162-982A-13H-4-W 99.5	118.2	133.02	133.12	4.78185	4.78979	1536	75	3.18639
162-982A-13H-4-W 100	118.2	133.02	133.12	4.78185	4.78979	1549	19	3.19005
162-982A-13H-4-W 101	118.21	133.03	133.13	4.78202	4.78998	1775	49	3.2492
162-982A-13H-4-W 104	118.24	133.06	133.16	4.78253	4.79054	1672	41	3.22324
162-982A-13H-4-W 106	118.26	133.08	133.18	4.78287	4.79091	1365	67	3.13513
162-982A-13H-4-W 107	118.27	133.09	133.19	4.78304	4.7911	1526	49	3.18355
162-982A-13H-4-W 109	118.29	133.11	133.21	4.78338	4.79147	1693	14	3.22866
162-982A-13H-4-W 110	118.3	133.12	133.22	4.78355	4.79165	1682	113	3.22583
162-982A-13H-4-W 112	118.32	133.14	133.24	4.78389	4.79203	1643	40	3.21564
162-982A-13H-4-W 114	118.34	133.16	133.26	4.78423	4.7924	1453	49	3.16227
162-982A-13H-4-W 116	118.36	133.18	133.28	4.78457	4.79277	1556	47	3.19201
162-982A-13H-4-W 119	118.39	133.21	133.31	4.78508	4.79333	1624	32	3.21059
162-982A-13H-4-W 120	118.4	133.22	133.32	4.78525	4.79352	1662	80	3.22063
162-982A-13H-4-W 122	118.42	133.24	133.34	4.78559	4.79389	1594	89	3.20249
162-982A-13H-4-W 125	118.45	133.27	133.37	4.7861	4.79445	1822	66	3.26055
162-982A-13H-4-W 127	118.47	133.29	133.39	4.78644	4.79482	1606	86	3.20575
162-982A-13H-4-W 128	118.48	133.3	133.4	4.78661	4.79501	1669	54	3.22246
162-982A-13H-4-W 129	118.49	133.31	133.41	4.78678	4.79519	1672	59	3.22324
162-982A-13H-4-W 132	118.52	133.34	133.44	4.78729	4.79575	1519	45	3.18156
162-982A-13H-4-W 134	118.54	133.36	133.46	4.78763	4.79612	1547	39	3.18949
162-982A-13H-4-W 136	118.56	133.38	133.48	4.78797	4.7965	1623	51	3.21032
162-982A-13H-4-W 138	118.58	133.4	133.5	4.78831	4.79687	1622	74	3.21005
162-982A-13H-4-W 139	118.59	133.41	133.51	4.78848	4.79705	1732	51	3.23855
162-982A-13H-4-W 141	118.61	133.43	133.53	4.78882	4.79743	1498	81	3.17551
162-982A-13H-4-W 144	118.64	133.46	133.56	4.78933	4.79799	1697	118	3.22968
162-982A-13H-4-W 145	118.65	133.47	133.57	4.7895	4.79817	1479	96	3.16997
162-982A-13H-4-W 148	118.68	133.5	133.6	4.79001	4.79873	1870	56	3.27184
162-982A-15H-1-W 2	131.72	148.71	149	5.04662	5.03678	1436	104	3.15715
162-982A-15H-1-W 4	131.74	148.73	149.02	5.04695	5.03704	1393	63	3.14395
162-982A-15H-1-W 6	131.76	148.75	149.04	5.04729	5.0373	1393	43	3.14395
162-982A-15H-1-W 7	131.77	148.76	149.05	5.04745	5.03743	1415	63	3.15076
162-982A-15H-1-W 11	131.81	148.8	149.09	5.04812	5.03795	1684	59	3.22634
162-982A-15H-1-W 12	131.82	148.81	149.1	5.04829	5.03808	1663	123	3.22089
162-982A-15H-1-W 14	131.84	148.83	149.12	5.04863	5.03834	1665	57	3.22141
162-982A-15H-1-W 16	131.86	148.85	149.14	5.04896	5.0386	1456	69	3.16316
162-982A-15H-1-W 19	131.89	148.88	149.17	5.04946	5.03899	1748	40	3.24254
162-982A-15H-1-W 20	131.9	148.89	149.18	5.04963	5.03912	1613	45	3.20763
162-982A-15H-1-W 22	131.92	148.91	149.2	5.04996	5.03937	1878	20	3.2737
162-982A-15H-1-W 24	131.94	148.93	149.22	5.0503	5.03963	1746	38	3.24204
162-982A-15H-1-W 26	131.96	148.95	149.24	5.05063	5.03989	1623	45	3.21032
162-982A-15H-1-W 28	131.98	148.97	149.26	5.05097	5.04015	1669	49	3.22246
162-982A-15H-1-W 30	132	148.99	149.28	5.0513	5.04041	1560	42	3.19312
162-982A-15H-1-W 31	132.01	149	149.29	5.05147	5.04054	1509	64	3.17869
162-982A-15H-1-W 34	132.04	149.03	149.32	5.05197	5.04093	1684	129	3.22634
162-982A-15H-1-W 36	132.06	149.05	149.34	5.05231	5.04119	1533	69	3.18554
162-982A-15H-1-W 38	132.08	149.07	149.36	5.05264	5.04145	1693	37	3.22866
162-982A-15H-1-W 41	132.11	149.1	149.39	5.05315	5.04184	1674	43	3.22376
162-982A-15H-1-W 42	132.12	149.11	149.4	5.05331	5.04197	1723	90	3.23629
162-982A-15H-1-W 44	132.14	149.13	149.42	5.05365	5.04223	1675	74	3.22401
162-982A-15H-1-W 46	132.16	149.15	149.44	5.05398	5.04249	1586	60	3.2003
162-982A-15H-1-W 48	132.18	149.17	149.46	5.05432	5.04275	1459	70	3.16406
162-982A-15H-1-W 50	132.2	149.19	149.48	5.05465	5.04301	1545	47	3.18893
162-982A-15H-1-W 52	132.22	149.21	149.5	5.05499	5.04327	1627	49	3.21139
162-982A-15H-1-W 53	132.23	149.22	149.51	5.05516	5.0434	1512	42	3.17955
162-982A-15H-1-W 56	132.26	149.25	149.54	5.05566	5.04379	1736	56	3.23955
162-982A-15H-1-W 58	132.28	149.27	149.56	5.05599	5.04405	1797	50	3.25455
162-982A-15H-1-W 60	132.3	149.29	149.58	5.05633	5.04431	1679	91	3.22505
162-982A-15H-1-W 63	132.33	149.32	149.61	5.05683	5.0447	1912	79	3.28149
162-982A-15H-1-W 64	132.34	149.33	149.62	5.057	5.04483	1795	111	3.25406
162-982A-15H-1-W 66	132.36	149.35	149.64	5.05733	5.04509	1637	48	3.21405
162-982A-15H-1-W 67	132.37	149.36	149.65	5.0575	5.04522	1790	99	3.25285
162-982A-15H-1-W 69	132.39	149.38	149.67	5.05783	5.04547	1691	113	3.22814
162-982A-15H-1-W 70	132.4	149.39	149.68	5.058	5.0456	1842	66	3.26529
162-982A-15H-1-W 73	132.43	149.42	149.71	5.0585	5.04599	1713	7	3.23376
162-982A-15H-1-W 74	132.44	149.43	149.72	5.05867	5.04612	1980	11	3.29667
162-982A-15H-1-W 76	132.46	149.45	149.74	5.05901	5.04638	1713	102	3.23376
162-982A-15H-1-W 77	132.47	149.46	149.75	5.05917	5.04651	1784	106	3.25139
162-982A-15H-1-W 80	132.5	149.49	149.78	5.05968	5.0469	1792	32	3.25334
162-982A-15H-1-W 82	132.52	149.51	149.8	5.06001	5.04716	1875	46	3.273
162-982A-15H-1-W 85	132.55	149.54	149.83	5.06051	5.04755	1968	111	3.29403
162-982A-15H-1-W 86	132.56	149.55	149.84	5.06068	5.04768	1994	54	3.29973
162-982A-15H-1-W 89	132.59	149.58	149.87	5.06118	5.04807	1921	64	3.28353
162-982A-15H-1-W 90	132.6	149.59	149.88	5.06135	5.0482	1895	86	3.27761
162-982A-15H-1-W 92	132.62	149.61	149.9	5.06169	5.04846	1899	69	3.27852
162-982A-15H-1-W 94	132.64	149.63	149.92	5.06202	5.04872	2359	95	3.37273
162-982A-15H-1-W 97	132.67	149.66	149.95	5.06252	5.04911	2372	51	3.37511
162-982A-15H-1-W 98	132.68	149.67	149.96	5.06269	5.04924	2224	106	3.34713
162-982A-15H-1-W 99	132.69	149.68	149.97	5.06286	5.04937	2408	51	3.38166
162-982A-15H-1-W 102	132.72	149.71	150	5.06336	5.04976	1663	71	3.22089
162-982A-15H-1-W 104	132.74	149.73	150.02	5.0637	5.05002	1757	75	3.24477
162-982A-15H-1-W 105	132.75	149.74	150.03	5.06386	5.05015	1550	49	3.19033
162-982A-15H-1-W 108	132.78	149.77	150.06	5.06437	5.05054	1792	106	3.25334
162-982A-15H-1-W 109	132.79	149.78	150.07	5.06453	5.05067	1975	39	3.29557
162-982A-15H-1-W 112	132.82	149.81	150.1	5.06504	5.05106	1463	58	3.16524
162-982A-15H-1-W 114	132.84	149.83	150.12	5.06537	5.05132	1519	59	3.18156
162-982A-15H-1-W 116	132.86	149.85	150.14	5.0657	5.05158	1600	71	3.20412
162-982A-15H-1-W 117	132.87	149.86	150.15	5.06587	5.05171	1471	67	3.16761
162-982A-15H-1-W 120	132.9	149.89	150.18	5.06637	5.05209	1600	107	3.20412
162-982A-15H-1-W 122	132.92	149.91	150.2	5.06671	5.05235	1475	77	3.16879
162-982A-15H-1-W 124	132.94	149.93	150.22	5.06704	5.05261	1412	111	3.14983
162-982A-15H-1-W 126	132.96	149.95	150.24	5.06738	5.05287	1538	79	3.18696
162-982A-15H-1-W 128	132.98	149.97	150.26	5.06771	5.05313	1495	7	3.17464
162-982A-15H-1-W 130	133	149.99	150.28	5.06805	5.05339	1606	37	3.20575
162-982A-15H-1-W 131	133.01	150	150.29	5.06822	5.05352	1685	67	3.2266
162-982A-15H-1-W 134	133.04	150.03	150.32	5.06872	5.05391	1695	53	3.22917
162-982A-15H-1-W 136	133.06	150.05	150.34	5.06905	5.05417	1792	78	3.25334
162-982A-15H-1-W 137	133.07	150.06	150.35	5.06922	5.0543	2131	19	3.32858
162-982A-15H-1-W 140	133.1	150.09	150.38	5.06972	5.05469	2280	37	3.35793
162-982A-15H-1-W 142	133.12	150.11	150.4	5.07006	5.05495	2103	79	3.32284
162-982A-15H-1-W 144	133.14	150.13	150.42	5.07039	5.05521	2206	46	3.34361
162-982A-15H-1-W 146	133.16	150.15	150.44	5.07073	5.05547	2565	123	3.40909
162-982A-15H-2-W 2	133.22	150.21	150.5	5.07173	5.05625	2655	29	3.42406
162-982A-15H-2-W 4	133.24	150.23	150.52	5.07207	5.05651	2717	97	3.43409
162-982A-15H-2-W 6	133.26	150.25	150.54	5.0724	5.05677	3025	100	3.48073
162-982A-15H-2-W 8	133.28	150.27	150.56	5.07274	5.05703	2964	55	3.47188
162-982A-15H-2-W 10	133.3	150.29	150.58	5.07307	5.05729	3070	67	3.48714
162-982A-15H-2-W 11	133.31	150.3	150.59	5.07324	5.05742	3087	96	3.48954
162-982A-15H-2-W 14	133.34	150.33	150.62	5.07374	5.05781	3029	44	3.4813
162-982A-15H-2-W 15	133.35	150.34	150.63	5.07391	5.05794	3415	74	3.53339
162-982A-15H-2-W 18	133.38	150.37	150.66	5.07441	5.05832	3297	90	3.51812
162-982A-15H-2-W 20	133.4	150.39	150.68	5.07475	5.05858	3335	95	3.5231
162-982A-15H-2-W 21	133.41	150.4	150.69	5.07491	5.05871	3210	52	3.50651
162-982A-15H-2-W 26	133.46	150.45	150.74	5.07575	5.05936	3276	99	3.51534
162-982A-15H-2-W 28	133.48	150.47	150.76	5.07609	5.05962	3344	48	3.52427
162-982A-15H-2-W 29	133.49	150.48	150.77	5.07625	5.05975	3374	60	3.52815
162-982A-15H-2-W 32	133.52	150.51	150.8	5.07676	5.06014	3935	71	3.59494
162-982A-15H-2-W 34	133.54	150.53	150.82	5.07709	5.0604	4053	115	3.60778
162-982A-15H-2-W 35	133.55	150.54	150.83	5.07726	5.06053	4487	95	3.65196
162-982A-15H-2-W 39	133.59	150.58	150.87	5.07793	5.06105	4108	91	3.61363
162-982A-15H-2-W 40	133.6	150.59	150.88	5.0781	5.06118	4219	103	3.62521
162-982A-15H-2-W 42	133.62	150.61	150.9	5.07843	5.06144	4123	134	3.61521
162-982A-15H-2-W 45	133.65	150.64	150.93	5.07893	5.06183	3391	41	3.53033
162-982A-15H-2-W 46	133.66	150.65	150.94	5.0791	5.06196	3354	119	3.52556
162-982A-15H-2-W 48	133.68	150.67	150.96	5.07944	5.06222	2836	61	3.45271
162-982A-15H-2-W 51	133.71	150.7	150.99	5.07994	5.06261	2371	76	3.37493
162-982A-15H-2-W 52	133.72	150.71	151	5.08011	5.06274	2196	39	3.34163
162-982A-15H-2-W 54	133.74	150.73	151.02	5.08044	5.063	2330	71	3.36736
162-982A-15H-2-W 55	133.75	150.74	151.03	5.08061	5.06313	2554	116	3.40722
162-982A-15H-2-W 58	133.78	150.77	151.06	5.08111	5.06352	1766	60	3.24699
162-982A-15H-2-W 60	133.8	150.79	151.08	5.08144	5.06378	1842	79	3.26529
162-982A-15H-2-W 63	133.83	150.82	151.11	5.08195	5.06417	1725	107	3.23679
162-982A-15H-2-W 64	133.84	150.83	151.12	5.08211	5.06429	1655	56	3.2188
162-982A-15H-2-W 66	133.86	150.85	151.14	5.08245	5.06455	1609	115	3.20656
162-982A-15H-2-W 67	133.87	150.86	151.15	5.08262	5.06468	1664	30	3.22115
162-982A-15H-2-W 68	133.88	150.87	151.16	5.08278	5.06481	1628	26	3.21165
162-982A-15H-2-W 70	133.9	150.89	151.18	5.08312	5.06507	1656	9	3.21906
162-982A-15H-2-W 72	133.92	150.91	151.2	5.08345	5.06533	1733	51	3.2388
162-982A-15H-2-W 75	133.95	150.94	151.23	5.08396	5.06572	1745	56	3.2418
162-982A-15H-2-W 76	133.96	150.95	151.24	5.08412	5.06585	1856	60	3.26858
162-982A-15H-2-W 78	133.98	150.97	151.26	5.08446	5.06611	1651	72	3.21775
162-982A-15H-2-W 80	134	150.99	151.28	5.08479	5.06637	1776	23	3.24944
162-982A-15H-2-W 82	134.02	151.01	151.3	5.08513	5.06663	1841	63	3.26505
162-982A-15H-2-W 83	134.03	151.02	151.31	5.0853	5.06676	1649	93	3.21722
162-982A-15H-2-W 86	134.06	151.05	151.34	5.0858	5.06715	1781	58	3.25066
162-982A-15H-2-W 87	134.07	151.06	151.35	5.08597	5.06728	1986	88	3.29798
162-982A-15H-2-W 90	134.1	151.09	151.38	5.08647	5.06767	2189	112	3.34025
162-982A-15H-2-W 91	134.11	151.1	151.39	5.08664	5.0678	1980	107	3.29667
162-982A-15H-2-W 95	134.15	151.14	151.43	5.08731	5.06832	2211	65	3.34459
162-982A-15H-2-W 96	134.16	151.15	151.44	5.08747	5.06845	2281	110	3.35813
162-982A-15H-2-W 98	134.18	151.17	151.46	5.08781	5.06871	2168	108	3.33606
162-982A-15H-2-W 101	134.21	151.2	151.49	5.08831	5.0691	2779	130	3.44389
162-982A-15H-2-W 102	134.22	151.21	151.5	5.08848	5.06923	2878	79	3.45909
162-982A-15H-2-W 104	134.24	151.23	151.52	5.08881	5.06949	3357	34	3.52595
162-982A-15H-2-W 105	134.25	151.24	151.53	5.08898	5.06962	3210	166	3.50651
162-982A-15H-2-W 108	134.28	151.27	151.56	5.08948	5.07001	3298	98	3.51825
162-982A-15H-2-W 109	134.29	151.28	151.57	5.08965	5.07014	3498	107	3.54382
162-982A-15H-2-W 112	134.32	151.31	151.6	5.09015	5.07053	3473	158	3.5407
162-982A-15H-2-W 114	134.34	151.33	151.62	5.09049	5.07078	4433	162	3.6467
162-982A-15H-2-W 115	134.35	151.34	151.63	5.09065	5.07091	4666	180	3.66894
162-982A-15H-2-W 116	134.36	151.35	151.64	5.09082	5.07104	5051	152	3.70338
162-982A-15H-2-W 119	134.39	151.38	151.67	5.09132	5.07143	4533	212	3.65639
162-982A-15H-2-W 120	134.4	151.39	151.68	5.09149	5.07156	1733	72	3.2388
162-982A-15H-2-W 121	134.41	151.4	151.69	5.09166	5.07169	4160	170	3.61909
162-982A-15H-2-W 124	134.44	151.43	151.72	5.09216	5.07208	2218	86	3.34596
162-982A-15H-2-W 126	134.46	151.45	151.74	5.0925	5.07234	1728	90	3.23754
162-982A-15H-2-W 127	134.47	151.46	151.75	5.09266	5.07247	1627	56	3.21139
162-982A-15H-2-W 131	134.51	151.5	151.79	5.09333	5.07299	1617	44	3.20871
162-982A-15H-2-W 132	134.52	151.51	151.8	5.0935	5.07312	1696	65	3.22943
162-982A-15H-2-W 134	134.54	151.53	151.82	5.09384	5.07338	1706	71	3.23198
162-982A-15H-2-W 135	134.55	151.54	151.83	5.094	5.07351	1525	103	3.18327
162-982A-15H-2-W 139	134.59	151.58	151.87	5.09467	5.07403	1344	80	3.1284
162-982A-15H-2-W 140	134.6	151.59	151.88	5.09484	5.07416	1465	60	3.16584
162-982A-15H-2-W 142	134.62	151.61	151.9	5.09518	5.07442	1344	46	3.1284
162-982A-15H-2-W 144	134.64	151.63	151.92	5.09551	5.07468	1266	118	3.10243
162-982A-15H-2-W 146	134.66	151.65	151.94	5.09584	5.07494	1364	38	3.13481
162-982A-15H-2-W 148	134.68	151.67	151.96	5.09618	5.0752	1492	60	3.17377
162-982A-15H-2-W 150	134.7	151.69	151.98	5.09651	5.07546	1670	50	3.22272
162-982A-15H-2-W 151	134.71	151.7	151.99	5.09668	5.07559	1569	64	3.19562
162-982A-15H-3-W 2	134.72	151.71	152	5.09685	5.07572	1563	79	3.19396
162-982A-15H-3-W 4	134.74	151.73	152.02	5.09718	5.07598	1611	65	3.2071
162-982A-15H-3-W 6	134.76	151.75	152.04	5.09752	5.07624	1672	47	3.22324
162-982A-15H-3-W 8	134.78	151.77	152.06	5.09785	5.0765	1559	80	3.19285
162-982A-15H-3-W 10	134.8	151.79	152.08	5.09819	5.07676	1539	56	3.18724
162-982A-15H-3-W 11	134.81	151.8	152.09	5.09836	5.07688	1560	45	3.19312
162-982A-15H-3-W 14	134.84	151.83	152.12	5.09886	5.07727	1619	63	3.20925
162-982A-15H-3-W 16	134.86	151.85	152.14	5.09919	5.07753	1625	61	3.21085
162-982A-15H-3-W 19	134.89	151.88	152.17	5.0997	5.07792	1655	4	3.2188
162-982A-15H-3-W 22	134.92	151.91	152.2	5.1002	5.07831	1496	39	3.17493
162-982A-15H-3-W 24	134.94	151.93	152.22	5.10053	5.07857	1666	87	3.22167
162-982A-15H-3-W 26	134.96	151.95	152.24	5.10087	5.07883	1716	74	3.23452
162-982A-15H-3-W 29	134.99	151.98	152.27	5.10137	5.07922	1745	43	3.2418
162-982A-15H-3-W 30	135	151.99	152.28	5.10154	5.07935	1804	27	3.25624
162-982A-15H-3-W 32	135.02	152.01	152.3	5.10187	5.07961	1830	45	3.26245
162-982A-15H-3-W 35	135.05	152.04	152.33	5.10238	5.08	1456	35	3.16316
162-982A-15H-3-W 36	135.06	152.05	152.34	5.10254	5.08021	1695	49	3.22917
162-982A-15H-3-W 39	135.09	152.08	152.37	5.10304	5.08084	1777	101	3.24969
162-982A-15H-3-W 40	135.1	152.09	152.38	5.10321	5.08106	1912	53	3.28149
162-982A-15H-3-W 42	135.12	152.11	152.4	5.10355	5.08148	1815	-12	3.25888
162-982A-15H-3-W 45	135.15	152.14	152.43	5.10405	5.08211	1669	84	3.22246
162-982A-15H-3-W 46	135.16	152.15	152.44	5.10422	5.08232	1659	90	3.21985
162-982A-15H-3-W 49	135.19	152.18	152.47	5.10472	5.08296	1807	97	3.25696
162-982A-15H-3-W 50	135.2	152.19	152.48	5.10489	5.08317	1788	98	3.25237
162-982A-15H-3-W 52	135.22	152.21	152.5	5.10522	5.08359	1883	55	3.27485
162-982A-15H-3-W 54	135.24	152.23	152.52	5.10556	5.08401	1908	49	3.28058
162-982A-15H-3-W 56	135.26	152.25	152.54	5.10589	5.08443	1805	56	3.25648
162-982A-15H-3-W 57	135.27	152.26	152.55	5.10606	5.08464	1850	83	3.26717
162-982A-15H-3-W 60	135.3	152.29	152.58	5.10656	5.08528	2173	121	3.33706
162-982A-15H-3-W 61	135.31	152.3	152.59	5.10673	5.08549	1883	37	3.27485
162-982A-15H-3-W 64.5	135.35	152.34	152.63	5.1074	5.08633	2325	91	3.36642
162-982A-15H-3-W 66	135.36	152.35	152.64	5.10757	5.08654	2158	67	3.33405
162-982A-15H-3-W 67	135.37	152.36	152.65	5.10773	5.08676	2170	79	3.33646
162-982A-15H-3-W 70	135.4	152.39	152.68	5.10824	5.08739	2197	58	3.34183
162-982A-15H-3-W 71	135.41	152.4	152.69	5.1084	5.0876	2585	97	3.41246
162-982A-15H-3-W 74	135.44	152.43	152.72	5.10891	5.08823	2265	146	3.35507
162-982A-15H-3-W 76	135.46	152.45	152.74	5.10924	5.08866	2103	53	3.32284
162-982A-15H-3-W 77	135.47	152.46	152.75	5.10941	5.08887	1906	110	3.28012
162-982A-15H-3-W 80	135.5	152.49	152.78	5.10991	5.0895	2151	66	3.33264
162-982A-15H-3-W 81	135.51	152.5	152.79	5.11008	5.08971	1940	8	3.2878
162-982A-15H-3-W 84	135.54	152.53	152.82	5.11058	5.09034	1946	84	3.28914
162-982A-15H-3-W 85	135.55	152.54	152.83	5.11075	5.09056	2061	53	3.31408
162-982A-15H-3-W 88	135.58	152.57	152.86	5.11125	5.09119	1915	76	3.28217
162-982A-15H-3-W 90	135.6	152.59	152.88	5.11158	5.09161	2006	45	3.30233
162-982A-15H-3-W 93	135.63	152.62	152.91	5.11209	5.09224	2148	74	3.33203
162-982A-15H-3-W 94	135.64	152.63	152.92	5.11225	5.09246	2341	84	3.3694
162-982A-15H-3-W 96	135.66	152.65	152.94	5.11259	5.09288	2277	91	3.35736
162-982A-15H-3-W 99	135.69	152.68	152.97	5.11309	5.09351	2617	67	3.4178
162-982A-15H-3-W 102	135.72	152.71	153	5.11359	5.09414	2488	56	3.39585
162-982A-15H-3-W 104	135.74	152.73	153.02	5.11393	5.09457	2500	114	3.39794
162-982A-15H-3-W 107	135.77	152.76	153.05	5.11443	5.0952	2617	9	3.4178
162-982A-15H-3-W 108	135.78	152.77	153.06	5.1146	5.09541	2609	60	3.41647
162-982A-15H-3-W 109	135.79	152.78	153.07	5.11477	5.09562	2627	153	3.41946
162-982A-15H-3-W 112	135.82	152.81	153.1	5.11527	5.09626	2725	50	3.43537
162-982A-15H-3-W 114	135.84	152.83	153.12	5.1156	5.09668	2715	99	3.43377
162-982A-15H-3-W 116	135.86	152.85	153.14	5.11594	5.0971	2849	57	3.45469
162-982A-15H-3-W 119	135.89	152.88	153.17	5.11644	5.09773	3010	85	3.47857
162-982A-15H-3-W 120	135.9	152.89	153.18	5.11661	5.09794	3051	84	3.48444
162-982A-15H-3-W 122	135.92	152.91	153.2	5.11694	5.09837	3084	25	3.48911
162-982A-15H-3-W 124	135.94	152.93	153.22	5.11728	5.09879	2977	124	3.47378
162-982A-15H-3-W 127	135.97	152.96	153.25	5.11778	5.09942	3104	80	3.49192
162-982A-15H-3-W 128	135.98	152.97	153.26	5.11795	5.09963	3189	78	3.50365
162-982A-15H-3-W 130	136	152.99	153.28	5.11828	5.10006	2864	44	3.45697
162-982A-15H-3-W 131	136.01	153	153.29	5.11845	5.10027	2810	66	3.44871
162-982A-15H-3-W 135	136.05	153.04	153.33	5.11912	5.10111	2957	97	3.47085
162-982A-15H-3-W 136	136.06	153.05	153.34	5.11929	5.10132	2794	38	3.44623
162-982A-15H-3-W 138	136.08	153.07	153.36	5.11962	5.10174	2777	81	3.44358
162-982A-15H-3-W 140	136.1	153.09	153.38	5.11996	5.10217	2906	41	3.4633
162-982A-15H-3-W 141	136.11	153.1	153.39	5.12012	5.10238	2836	91	3.45271
162-982A-15H-3-W 142	136.12	153.11	153.4	5.12029	5.10259	2755	88	3.44012
162-982A-15H-3-W 144	136.14	153.13	153.42	5.12063	5.10301	2957	92	3.47085
162-982A-15H-3-W 145	136.15	153.14	153.43	5.12079	5.10322	2975	78	3.47349
162-982A-15H-3-W 146	136.16	153.15	153.44	5.12096	5.10343	2798	114	3.44685
162-982A-15H-3-W 147	136.17	153.16	153.45	5.12113	5.10364	2600	74	3.41497
162-982A-15H-4-W 2	136.2	153.19	153.48	5.12163	5.10428	2697	43	3.43088
162-982A-15H-4-W 4	136.22	153.21	153.5	5.12197	5.1047	2483	55	3.39498
162-982A-15H-4-W 6	136.24	153.23	153.52	5.1223	5.10512	2111	15	3.32449
162-982A-15H-4-W 8	136.26	153.25	153.54	5.12264	5.10554	1939	105	3.28758
162-982A-15H-4-W 9	136.27	153.26	153.55	5.1228	5.10576	2001	33	3.30125
162-982A-15H-4-W 12	136.3	153.29	153.58	5.12331	5.10639	1905	132	3.27989
162-982A-15H-4-W 14	136.32	153.31	153.6	5.12364	5.10681	1756	73	3.24452
162-982A-15H-4-W 17	136.35	153.34	153.63	5.12414	5.10744	1509	73	3.17869
162-982A-15H-4-W 19	136.37	153.36	153.65	5.12448	5.10787	1585	27	3.20003
162-982A-15H-4-W 20	136.38	153.37	153.66	5.12465	5.10808	1642	61	3.21537
162-982A-15H-4-W 21	136.39	153.38	153.67	5.12481	5.10829	1637	108	3.21405
162-982A-15H-4-W 22	136.4	153.39	153.68	5.12498	5.1085	1403	27	3.14706
162-982A-15H-4-W 25	136.43	153.42	153.71	5.12548	5.10913	1710	43	3.233
162-982A-15H-4-W 26	136.44	153.43	153.72	5.12565	5.10934	1646	70	3.21643
162-982A-15H-4-W 29	136.47	153.46	153.75	5.12615	5.10998	1590	65	3.2014
162-982A-15H-4-W 30	136.48	153.47	153.76	5.12632	5.11019	1517	41	3.18099
162-982A-15H-4-W 32	136.5	153.49	153.78	5.12665	5.11061	1537	46	3.18667
162-982A-15H-4-W 34	136.52	153.51	153.8	5.12699	5.11103	1697	75	3.22968
162-982A-15H-4-W 37	136.55	153.54	153.83	5.12749	5.11167	1530	-13	3.18469
162-982A-15H-4-W 39	136.57	153.56	153.85	5.12783	5.11209	1679	89	3.22505
162-982A-15H-4-W 40	136.58	153.57	153.86	5.12799	5.1123	2026	63	3.30664
162-982A-15H-4-W 43	136.61	153.6	153.89	5.1285	5.11293	1492	106	3.17377
162-982A-15H-4-W 46	136.64	153.63	153.92	5.129	5.11357	1648	78	3.21696
162-982A-15H-4-W 49	136.67	153.66	153.95	5.1295	5.1142	1521	15	3.18213
162-982A-15H-4-W 50	136.68	153.67	153.96	5.12967	5.11441	1564	76	3.19424
162-982A-15H-4-W 54	136.72	153.71	154	5.13034	5.11526	1888	43	3.276
162-982A-15H-4-W 56	136.74	153.73	154.02	5.13067	5.11568	1653	32	3.21827
162-982A-15H-4-W 58	136.76	153.75	154.04	5.13101	5.1161	1472	34	3.16791
162-982A-15H-4-W 59	136.77	153.76	154.05	5.13118	5.11631	1368	59	3.13609
162-982A-15H-4-W 61	136.79	153.78	154.07	5.13151	5.11673	1470	70	3.16732
162-982A-15H-4-W 64	136.82	153.81	154.1	5.13201	5.11737	1499	41	3.1758
162-982A-15H-4-W 66	136.84	153.83	154.12	5.13235	5.11779	1841	54	3.26505
162-982A-15H-4-W 67	136.85	153.84	154.13	5.13252	5.118	1645	87	3.21617
162-982A-15H-4-W 70	136.88	153.87	154.16	5.13302	5.11879	1672	58	3.22324
162-982A-15H-4-W 72	136.9	153.89	154.18	5.13335	5.11932	1529	58	3.18441
162-982A-15H-4-W 74	136.92	153.91	154.2	5.13369	5.11985	1766	46	3.24699
162-982A-15H-4-W 75	136.93	153.92	154.21	5.13385	5.12011	1742	59	3.24105
162-982A-15H-4-W 78	136.96	153.95	154.24	5.13436	5.12091	1838	102	3.26435
162-982A-15H-4-W 80	136.98	153.97	154.26	5.13469	5.12143	1904	61	3.27967
162-982A-15H-4-W 83	137.01	154	154.29	5.13519	5.12223	2073	73	3.3166
162-982A-15H-4-W 84	137.02	154.01	154.3	5.13536	5.12249	1964	112	3.29314
162-982A-15H-4-W 87	137.05	154.04	154.33	5.13586	5.12328	2049	51	3.31154
162-982A-15H-4-W 88	137.06	154.05	154.34	5.13603	5.12355	2011	51	3.30341
162-982A-15H-4-W 91	137.09	154.08	154.37	5.13653	5.12434	2488	73	3.39585
162-982A-15H-4-W 92	137.1	154.09	154.38	5.1367	5.1246	2190	72	3.34044
162-982A-15H-4-W 94.5	137.13	154.12	154.41	5.1372	5.1254	2749	31	3.43917
162-982A-15H-4-W 97	137.15	154.14	154.43	5.13754	5.12592	3182	59	3.5027
162-982A-15H-4-W 98	137.16	154.15	154.44	5.13771	5.12619	2967	74	3.47232
162-982A-15H-4-W 101	137.19	154.18	154.47	5.13821	5.12698	2847	27	3.45439
162-982A-15H-4-W 102	137.2	154.19	154.48	5.13838	5.12725	2876	24	3.45879
162-982A-15H-4-W 103	137.21	154.2	154.49	5.13854	5.12751	2959	61	3.47114
162-982A-15H-4-W 106	137.24	154.23	154.52	5.13905	5.1283	2732	79	3.43648
162-982A-15H-4-W 108	137.26	154.25	154.54	5.13938	5.12883	2382	32	3.37694
162-982A-15H-4-W 110	137.28	154.27	154.56	5.13972	5.12936	2449	98	3.38899
162-982A-15H-4-W 112	137.3	154.29	154.58	5.14005	5.12989	2284	75	3.3587
162-982A-15H-4-W 115	137.33	154.32	154.61	5.14055	5.13068	1955	66	3.29115
162-982A-15H-4-W 116	137.34	154.33	154.62	5.14072	5.13094	2023	97	3.306
162-982A-15H-4-W 118	137.36	154.35	154.64	5.14105	5.13147	2087	53	3.31952
162-982A-15H-4-W 121	137.39	154.38	154.67	5.14156	5.13226	1901	-5	3.27898
162-982A-15H-4-W 123	137.41	154.4	154.69	5.14189	5.13279	1801	60	3.25551
162-982A-15H-4-W 124	137.42	154.41	154.7	5.14206	5.13306	1800	76	3.25527
162-982A-15H-4-W 127	137.45	154.44	154.73	5.14256	5.13385	1842	56	3.26529
162-982A-15H-4-W 128	137.46	154.45	154.74	5.14273	5.13411	1565	-8	3.19451
162-982A-15H-4-W 130	137.48	154.47	154.76	5.14306	5.13464	1894	92	3.27738
162-982A-15H-4-W 131	137.49	154.48	154.77	5.14323	5.13491	1670	53	3.22272
162-982A-15H-4-W 136	137.54	154.53	154.82	5.14407	5.13623	1860	100	3.26951
162-982A-15H-4-W 138	137.56	154.55	154.84	5.1444	5.13675	1570	71	3.1959
162-982A-15H-4-W 139	137.57	154.56	154.85	5.14457	5.13702	1682	103	3.22583
162-982A-15H-4-W 140	137.58	154.57	154.86	5.14474	5.13728	1764	60	3.2465
162-982A-15H-5-W 2	137.7	154.69	154.98	5.14675	5.14045	2543	94	3.40535
162-982A-15H-5-W 4	137.72	154.71	155	5.14708	5.14098	2573	68	3.41044
162-982A-15H-5-W 6	137.74	154.73	155.02	5.14742	5.14151	2746	58	3.4387
162-982A-15H-5-W 9	137.77	154.76	155.05	5.14792	5.1423	2724	43	3.43521
162-982A-15H-5-W 10	137.78	154.77	155.06	5.14809	5.14257	2788	60	3.44529
162-982A-15H-5-W 13	137.81	154.8	155.09	5.14859	5.14336	2776	99	3.44342
162-982A-15H-5-W 14	137.82	154.81	155.1	5.14876	5.14362	2621	59	3.41847
162-982A-15H-5-W 17	137.85	154.84	155.13	5.14926	5.14442	2969	88	3.47261
162-982A-15H-5-W 18	137.86	154.85	155.14	5.14943	5.14468	3078	69	3.48827
162-982A-15H-5-W 20.5	137.89	154.88	155.17	5.14993	5.14547	3160	66	3.49969
162-982A-15H-5-W 23	137.91	154.9	155.19	5.15026	5.146	3168	72	3.50079
162-982A-15H-5-W 24	137.92	154.91	155.2	5.15043	5.14626	3300	121	3.51851
162-982A-15H-5-W 27	137.95	154.94	155.23	5.15093	5.14706	3768	108	3.57611
162-982A-15H-5-W 28	137.96	154.95	155.24	5.1511	5.14732	4369	100	3.64038
162-982A-15H-5-W 30	137.98	154.97	155.26	5.15144	5.14785	4851	124	3.68583
162-982A-15H-5-W 32.5	138.01	155	155.29	5.15194	5.14864	5498	224	3.7402
162-982A-15H-5-W 35	138.03	155.02	155.31	5.15227	5.14917	6437	183	3.80868
162-982A-15H-5-W 36	138.04	155.03	155.32	5.15244	5.14943	6384	178	3.80509
162-982A-15H-5-W 37	138.05	155.04	155.33	5.15261	5.1497	5946	165	3.77422
162-982A-15H-5-W 40	138.08	155.07	155.36	5.15311	5.15049	2621	73	3.8772
162-982A-15H-5-W 41	138.09	155.08	155.37	5.15328	5.15075	2621	72	3.92438
162-982A-15H-5-W 44	138.12	155.11	155.4	5.15378	5.15155	3712	74	3.56961
162-982A-15H-5-W 45	138.13	155.12	155.41	5.15395	5.15181	3678	151	3.56561
162-982A-15H-5-W 47.5	138.16	155.15	155.44	5.15445	5.1526	2931	49	3.46702
162-982A-15H-5-W 50	138.18	155.17	155.46	5.15479	5.15313	3574	64	3.55315
162-982A-15H-5-W 52	138.2	155.19	155.48	5.15512	5.15366	3374	66	3.52815
162-982A-15H-5-W 53	138.21	155.2	155.49	5.15529	5.15392	3158	54	3.49941
162-982A-15H-5-W 56	138.24	155.23	155.52	5.15579	5.15472	2297	62	3.36116
162-982A-15H-5-W 57	138.25	155.24	155.53	5.15596	5.15498	2334	31	3.3681
162-982A-15H-5-W 60	138.28	155.27	155.56	5.15646	5.15577	2489	56	3.39602
162-982A-15H-5-W 63	138.31	155.3	155.59	5.15696	5.15657	2380	76	3.37658
162-982A-15H-5-W 64	138.32	155.31	155.6	5.15713	5.15683	2145	56	3.33143
162-982A-15H-5-W 67	138.35	155.34	155.63	5.15763	5.15762	2390	23	3.3784
162-982A-15H-5-W 68	138.36	155.35	155.64	5.1578	5.15789	2417	73	3.38328
162-982A-15H-5-W 69	138.37	155.36	155.65	5.15797	5.15815	2197	62	3.34183
162-982A-15H-5-W 72	138.4	155.39	155.68	5.15847	5.15894	2339	83	3.36903
162-982A-15H-5-W 73	138.41	155.4	155.69	5.15864	5.15921	2325	62	3.36642
162-982A-15H-5-W 74	138.42	155.41	155.7	5.1588	5.15947	2287	90	3.35927
162-982A-15H-5-W 77	138.45	155.44	155.73	5.15931	5.16016	2399	102	3.38003
162-982A-15H-5-W 78	138.46	155.45	155.74	5.15947	5.16033	2416	60	3.3831
162-982A-15H-5-W 80	138.48	155.47	155.76	5.15981	5.16066	2424	67	3.38453
162-982A-15H-5-W 82	138.5	155.49	155.78	5.16014	5.16098	2469	76	3.39252
162-982A-15H-5-W 84	138.52	155.51	155.8	5.16048	5.16131	2410	88	3.38202
162-982A-15H-5-W 87	138.55	155.54	155.83	5.16098	5.1618	2555	85	3.40739
162-982A-15H-5-W 88	138.56	155.55	155.84	5.16115	5.16197	2665	65	3.4257
162-982A-15H-5-W 90	138.58	155.57	155.86	5.16148	5.1623	2324	56	3.36624
162-982A-15H-5-W 91	138.59	155.58	155.87	5.16165	5.16246	2298	78	3.36135
162-982A-15H-5-W 92	138.6	155.59	155.88	5.16182	5.16262	2365	49	3.37383
162-982A-15H-5-W 94	138.62	155.61	155.9	5.16215	5.16295	2364	78	3.37365
162-982A-15H-5-W 96	138.64	155.63	155.92	5.16249	5.16328	2276	65	3.35717
162-982A-15H-5-W 98	138.66	155.65	155.94	5.16282	5.16361	2445	57	3.38828
162-982A-15H-5-W 101	138.69	155.68	155.97	5.16332	5.1641	2307	71	3.36305
162-982A-15H-5-W 102	138.7	155.69	155.98	5.16349	5.16426	2221	67	3.34655
162-982A-15H-5-W 104	138.72	155.71	156	5.16383	5.16459	2308	58	3.36324
162-982A-15H-5-W 105	138.73	155.72	156.01	5.16399	5.16476	2147	50	3.33183
162-982A-15H-5-W 108	138.76	155.75	156.04	5.1645	5.16525	2276	53	3.35717
162-982A-15H-5-W 110	138.78	155.77	156.06	5.16483	5.16558	2209	75	3.3442
162-982A-15H-5-W 111	138.79	155.78	156.07	5.165	5.16574	2398	48	3.37985
162-982A-15H-5-W 114	138.82	155.81	156.1	5.1655	5.16623	2623	46	3.4188
162-982A-15H-5-W 115	138.83	155.82	156.11	5.16567	5.1664	2797	102	3.44669
162-982A-15H-5-W 118	138.86	155.85	156.14	5.16617	5.16689	2736	89	3.43712
162-982A-15H-5-W 120	138.88	155.87	156.16	5.16651	5.16722	2941	25	3.4685
162-982A-15H-5-W 123	138.91	155.9	156.19	5.16701	5.16771	3025	57	3.48073
162-982A-15H-5-W 125	138.93	155.92	156.21	5.16734	5.16804	3154	51	3.49886
162-982A-15H-5-W 126	138.94	155.93	156.22	5.16751	5.1682	3350	84	3.52504
162-982A-15H-5-W 128	138.96	155.95	156.24	5.16785	5.16853	3159	78	3.49955
162-982A-15H-5-W 130	138.98	155.97	156.26	5.16818	5.16886	3105	82	3.49206
162-982A-15H-5-W 131	138.99	155.98	156.27	5.16835	5.16902	3062	59	3.48601
162-982A-15H-5-W 134	139.02	156.01	156.3	5.16885	5.16951	3203	41	3.50556
162-982A-15H-5-W 136	139.04	156.03	156.32	5.16919	5.16984	3396	39	3.53097
162-982A-15H-5-W 139	139.07	156.06	156.35	5.16969	5.17033	3345	121	3.5244
162-982A-15H-5-W 140	139.08	156.07	156.36	5.16986	5.1705	3347	49	3.52466
162-982A-15H-5-W 141	139.09	156.08	156.37	5.17002	5.17066	3563	111	3.55182
162-982A-15H-5-W 144	139.12	156.11	156.4	5.17053	5.17115	3465	92	3.5397
162-982A-15H-5-W 146	139.14	156.13	156.42	5.17086	5.17148	3338	105	3.52349
162-982A-15H-5-W 148	139.16	156.15	156.44	5.17119	5.17181	2844	38	3.45393
162-982A-15H-6-W 3	139.21	156.2	156.49	5.17203	5.17263	2699	123	3.4312
162-982A-15H-6-W 4	139.22	156.21	156.5	5.1722	5.17279	3043	124	3.4833
162-982A-15H-6-W 6	139.24	156.23	156.52	5.17253	5.17312	2915	58	3.46464
162-982A-15H-6-W 8	139.26	156.25	156.54	5.17287	5.17345	2758	-29	3.44059
162-982A-15H-6-W 10	139.28	156.27	156.56	5.1732	5.17378	2596	91	3.4143
162-982A-15H-6-W 11	139.29	156.28	156.57	5.17337	5.17394	2872	26	3.45818
162-982A-15H-6-W 12	139.3	156.29	156.58	5.17354	5.1741	2629	75	3.41979
162-982A-15H-6-W 14	139.32	156.31	156.6	5.17387	5.17443	2225	33	3.34733
162-982A-15H-6-W 16	139.34	156.33	156.62	5.17421	5.17476	2384	66	3.37731
162-982A-15H-6-W 19	139.37	156.36	156.65	5.17471	5.17525	2196	36	3.34163
162-982A-15H-6-W 20	139.38	156.37	156.66	5.17488	5.17542	1939	66	3.28758
162-982A-15H-6-W 21	139.39	156.38	156.67	5.17505	5.17558	2071	82	3.31618
162-982A-15H-6-W 24	139.42	156.41	156.7	5.17555	5.17607	2035	35	3.30856
162-982A-15H-6-W 26	139.44	156.43	156.72	5.17588	5.1764	2076	92	3.31723
162-982A-15H-6-W 28	139.46	156.45	156.74	5.17622	5.17673	1927	71	3.28488
162-982A-15H-6-W 29	139.47	156.46	156.75	5.17639	5.17689	1740	55	3.24055
162-982A-15H-6-W 32	139.5	156.49	156.78	5.17689	5.17738	1726	57	3.23704
162-982A-15H-6-W 34	139.52	156.51	156.8	5.17722	5.17771	1660	52	3.22011
162-982A-15H-6-W 38	139.56	156.55	156.84	5.17789	5.17837	1665	23	3.22141
162-982A-15H-6-W 39	139.57	156.56	156.85	5.17806	5.17853	1686	44	3.22686
162-982A-15H-6-W 42	139.6	156.59	156.88	5.17856	5.17902	1612	63	3.20737
162-982A-15H-6-W 45	139.63	156.62	156.91	5.17906	5.17952	1494	54	3.17435
162-982A-15H-6-W 46	139.64	156.63	156.92	5.17923	5.17968	1686	53	3.22686
162-982A-15H-6-W 48.5	139.67	156.66	156.95	5.17973	5.18017	1785	69	3.25164
162-982A-15H-6-W 51	139.69	156.68	156.97	5.18007	5.1805	1728	49	3.23754
162-982A-15H-6-W 52	139.7	156.69	156.98	5.18024	5.18066	1596	84	3.20303
162-982A-15H-6-W 54	139.72	156.71	157	5.18057	5.18099	1526	42	3.18355
162-982A-15H-6-W 58	139.76	156.75	157.04	5.18124	5.18165	1668	105	3.2222
162-982A-15H-6-W 63	139.81	156.8	157.09	5.18208	5.18247	1387	58	3.14208
162-982A-15H-6-W 64	139.82	156.81	157.1	5.18225	5.18263	1501	109	3.17638
162-982A-15H-6-W 68	139.86	156.85	157.14	5.18292	5.18329	1628	32	3.21165
162-982A-15H-6-W 69	139.87	156.86	157.15	5.18308	5.18345	1684	80	3.22634
162-982A-15H-6-W 71.5	139.9	156.89	157.18	5.18359	5.18394	1676	57	3.22427
162-982A-15H-6-W 76	139.94	156.93	157.22	5.18426	5.1846	1490	37	3.17319
162-982A-15H-6-W 78.5	139.97	156.96	157.25	5.18476	5.18509	1415	61	3.15076
162-982A-15H-6-W 81	139.99	156.98	157.27	5.18509	5.18542	1572	83	3.19645
162-982A-15H-6-W 84	140.02	157.01	157.3	5.1856	5.18591	1392	59	3.14364
162-982A-15H-6-W 87	140.05	157.04	157.33	5.1861	5.1864	1462	-19	3.16495
162-982A-15H-6-W 91	140.09	157.08	157.37	5.18677	5.18706	1379	55	3.13956
162-982A-15H-6-W 92	140.1	157.09	157.38	5.18693	5.18722	1336	53	3.12581
162-982A-15H-6-W 96	140.14	157.13	157.42	5.1876	5.18788	1439	49	3.15806
162-982A-15H-6-W 97	140.15	157.14	157.43	5.18777	5.18804	1549	60	3.19005
162-982A-15H-6-W 100	140.18	157.17	157.46	5.18827	5.18854	1387	45	3.14208
162-982A-15H-6-W 104	140.22	157.21	157.5	5.18894	5.18919	1447	76	3.16047
162-982A-15H-6-W 105	140.23	157.22	157.51	5.18911	5.18936	1477	38	3.16938
162-982A-15H-6-W 110	140.28	157.27	157.56	5.18995	5.19018	1464	44	3.16554
162-982A-15H-6-W 114	140.32	157.31	157.6	5.19062	5.19083	1429	20	3.15503
162-982A-15H-6-W 116	140.34	157.33	157.62	5.19095	5.19116	1582	61	3.19921
162-982A-16H-1-W 16	141.36	159.33	159.48	5.23258	5.23258	2421	66	3.38399
162-982A-16H-1-W 18	141.38	159.35	159.5	5.23303	5.23303	2542	30	3.40518
162-982A-16H-1-W 20	141.4	159.37	159.52	5.23348	5.23348	2515	68	3.40054
162-982A-16H-1-W 23	141.43	159.4	159.55	5.23416	5.23416	2672	32	3.42684
162-982A-16H-1-W 24	141.44	159.41	159.56	5.23438	5.23438	2597	73	3.41447
162-982A-16H-1-W 26	141.46	159.43	159.58	5.23483	5.23483	2630	55	3.41996
162-982A-16H-1-W 28	141.48	159.45	159.6	5.23529	5.23529	2632	85	3.42029
162-982A-16H-1-W 31	141.51	159.48	159.63	5.23596	5.23596	2602	62	3.41531
162-982A-16H-1-W 32	141.52	159.49	159.64	5.23619	5.23619	2777	77	3.44358
162-982A-16H-1-W 34	141.54	159.51	159.66	5.23664	5.23664	2515	81	3.40054
162-982A-16H-1-W 37	141.57	159.54	159.69	5.23732	5.23732	2460	52	3.39094
162-982A-16H-1-W 38	141.58	159.55	159.7	5.23754	5.23754	2748	51	3.43902
162-982A-16H-1-W 39.5	141.6	159.57	159.72	5.23799	5.23799	2452	84	3.38952
162-982A-16H-1-W 42	141.62	159.59	159.74	5.23844	5.23844	2331	127	3.36754
162-982A-16H-1-W 44	141.64	159.61	159.76	5.23889	5.23889	2553	43	3.40705
162-982A-16H-1-W 47	141.67	159.64	159.79	5.23957	5.23957	2373	75	3.3753
162-982A-16H-1-W 48	141.68	159.65	159.8	5.2398	5.2398	2497	93	3.39742
162-982A-16H-1-W 50	141.7	159.67	159.82	5.24025	5.24025	2416	91	3.3831
162-982A-16H-1-W 54	141.74	159.71	159.86	5.24115	5.24115	2076	47	3.31723
162-982A-16H-1-W 56	141.76	159.73	159.88	5.2416	5.2416	3251	57	3.51202
162-982A-16H-1-W 57	141.77	159.74	159.89	5.24183	5.24183	2059	35	3.31366
162-982A-16H-1-W 60	141.8	159.77	159.92	5.2425	5.2425	2179	71	3.33826
162-982A-16H-1-W 62	141.82	159.79	159.94	5.24295	5.24295	2152	69	3.33284
162-982A-16H-1-W 63	141.83	159.8	159.95	5.24318	5.24318	2031	24	3.30771
162-982A-16H-1-W 66	141.86	159.83	159.98	5.24386	5.24386	1678	52	3.22479
162-982A-16H-1-W 68	141.88	159.85	160	5.24431	5.24431	2007	51	3.30255
162-982A-16H-1-W 70	141.9	159.87	160.02	5.24476	5.24476	1814	73	3.25864
162-982A-16H-1-W 73	141.93	159.9	160.05	5.24544	5.24544	1719	21	3.23528
162-982A-16H-1-W 74	141.94	159.91	160.06	5.24566	5.24566	1718	76	3.23502
162-982A-16H-1-W 75	141.95	159.92	160.07	5.24589	5.24589	1746	73	3.24204
162-982A-16H-1-W 78	141.98	159.95	160.1	5.24656	5.24656	1878	93	3.2737
162-982A-16H-1-W 80	142	159.97	160.12	5.24702	5.24702	2071	51	3.31618
162-982A-16H-1-W 82	142.02	159.99	160.14	5.24747	5.24747	2028	50	3.30707
162-982A-16H-1-W 85	142.05	160.02	160.17	5.24814	5.24814	2312	25	3.36399
162-982A-16H-1-W 86	142.06	160.03	160.18	5.24837	5.24837	2132	51	3.32879
162-982A-16H-1-W 88	142.08	160.05	160.2	5.24882	5.24882	2128	49	3.32797
162-982A-16H-1-W 90	142.1	160.07	160.22	5.24927	5.24927	2171	38	3.33666
162-982A-16H-1-W 94	142.14	160.11	160.26	5.25017	5.25017	2061	30	3.31408
162-982A-16H-1-W 97	142.17	160.14	160.29	5.25085	5.25085	1970	60	3.29447
162-982A-16H-1-W 98	142.18	160.15	160.3	5.25108	5.25108	2194	102	3.34124
162-982A-16H-1-W 100	142.2	160.17	160.32	5.25153	5.25153	1979	87	3.29645
162-982A-16H-1-W 102	142.22	160.19	160.34	5.25198	5.25198	1864	65	3.27045
162-982A-16H-1-W 104	142.24	160.21	160.36	5.25243	5.25243	2193	76	3.34104
162-982A-16H-1-W 106	142.26	160.23	160.38	5.25288	5.25288	2060	43	3.31387
162-982A-16H-1-W 107	142.27	160.24	160.39	5.25311	5.25311	2021	26	3.30557
162-982A-16H-1-W 111	142.31	160.28	160.43	5.25401	5.25401	2040	101	3.30963
162-982A-16H-1-W 112	142.32	160.29	160.44	5.25423	5.25423	1949	50	3.28981
162-982A-16H-1-W 113	142.33	160.3	160.45	5.25446	5.25446	2103	71	3.32284
162-982A-16H-1-W 117	142.37	160.34	160.49	5.25536	5.25536	1975	73	3.29557
162-982A-16H-1-W 118	142.38	160.35	160.5	5.25559	5.25559	2020	56	3.30535
162-982A-16H-1-W 121	142.41	160.38	160.53	5.25626	5.25626	1887	39	3.27577
162-982A-16H-1-W 122	142.42	160.39	160.54	5.25649	5.25649	1965	41	3.29336
162-982A-16H-1-W 124	142.44	160.41	160.56	5.25694	5.25694	2039	114	3.30942
162-982A-16H-1-W 126	142.46	160.43	160.58	5.25739	5.25739	1931	44	3.28578
162-982A-16H-1-W 127	142.47	160.44	160.59	5.25762	5.25762	1985	43	3.29776
162-982A-16H-1-W 130	142.5	160.47	160.62	5.25829	5.25829	2198	37	3.34203
162-982A-16H-1-W 132	142.52	160.49	160.64	5.25874	5.25874	1976	26	3.29579
162-982A-16H-1-W 135	142.55	160.52	160.67	5.25942	5.25942	2205	47	3.34341
162-982A-16H-1-W 136	142.56	160.53	160.68	5.25965	5.25965	2274	62	3.35679
162-982A-16H-1-W 137	142.57	160.54	160.69	5.25987	5.25987	2225	58	3.34733
162-982A-16H-1-W 138	142.58	160.55	160.7	5.2601	5.2601	2322	68	3.36586
162-982A-16H-1-W 141	142.61	160.58	160.73	5.26077	5.26077	2430	91	3.38561
162-982A-16H-1-W 142	142.62	160.59	160.74	5.261	5.261	2517	41	3.40088
162-982A-16H-1-W 144	142.64	160.61	160.76	5.26145	5.26145	2598	60	3.41464
162-982A-16H-1-W 146	142.66	160.63	160.78	5.2619	5.2619	2512	53	3.40002
162-982A-16H-1-W 148	142.68	160.65	160.8	5.26235	5.26235	2526	33	3.40243
162-982A-16H-1-W 149.5	142.7	160.67	160.82	5.2628	5.2628	2478	71	3.3941
162-982A-16H-2-W 2	142.72	160.69	160.84	5.26326	5.26326	2712	86	3.43329
162-982A-16H-2-W 4	142.74	160.71	160.86	5.26371	5.26371	2461	94	3.39111
162-982A-16H-2-W 6	142.76	160.73	160.88	5.26416	5.26416	2338	62	3.36884
162-982A-16H-2-W 8	142.78	160.75	160.9	5.26461	5.26461	2538	70	3.40449
162-982A-16H-2-W 10	142.8	160.77	160.92	5.26506	5.26506	2331	114	3.36754
162-982A-16H-2-W 12	142.82	160.79	160.94	5.26551	5.26551	2371	38	3.37493
162-982A-16H-2-W 14	142.84	160.81	160.96	5.26596	5.26596	2313	55	3.36418
162-982A-16H-2-W 16	142.86	160.83	160.98	5.26641	5.26641	2170	76	3.33646
162-982A-16H-2-W 17	142.87	160.84	160.99	5.26664	5.26664	2163	79	3.33506
162-982A-16H-2-W 20.5	142.91	160.88	161.03	5.26754	5.26754	2236	69	3.34947
162-982A-16H-2-W 21.5	142.92	160.89	161.04	5.26777	5.26777	1808	34	3.2572
162-982A-16H-2-W 24	142.94	160.91	161.06	5.26822	5.26822	1935	113	3.28668
162-982A-16H-2-W 26	142.96	160.93	161.08	5.26867	5.26867	1953	89	3.2907
162-982A-16H-2-W 28	142.98	160.95	161.1	5.26912	5.26912	1918	82	3.28285
162-982A-16H-2-W 30	143	160.97	161.12	5.26957	5.26957	1925	65	3.28443
162-982A-16H-2-W 32	143.02	160.99	161.14	5.27002	5.27002	2040	57	3.30963
162-982A-16H-2-W 34	143.04	161.01	161.16	5.27047	5.27047	1926	64	3.28466
162-982A-16H-2-W 36	143.06	161.03	161.18	5.27092	5.27092	1922	74	3.28375
162-982A-16H-2-W 40	143.1	161.07	161.22	5.27183	5.27183	2166	29	3.33566
162-982A-16H-2-W 42	143.12	161.09	161.24	5.27228	5.27228	1849	67	3.26694
162-982A-16H-2-W 44	143.14	161.11	161.26	5.27273	5.27273	2073	61	3.3166
162-982A-16H-2-W 46	143.16	161.13	161.28	5.27318	5.27318	2224	91	3.34713
162-982A-16H-2-W 48	143.18	161.15	161.3	5.27363	5.27363	2101	90	3.32243
162-982A-16H-2-W 51	143.21	161.18	161.33	5.27431	5.27431	2032	47	3.30792
162-982A-16H-2-W 52	143.22	161.19	161.34	5.27453	5.27453	1958	66	3.29181
162-982A-16H-2-W 54	143.24	161.21	161.36	5.27498	5.27498	1998	81	3.3006
162-982A-16H-2-W 59	143.29	161.26	161.41	5.27611	5.27611	2245	46	3.35122
162-982A-16H-2-W 60	143.3	161.27	161.42	5.27634	5.27634	2363	85	3.37346
162-982A-16H-2-W 63	143.33	161.3	161.45	5.27702	5.27702	2343	93	3.36977
162-982A-16H-2-W 64	143.34	161.31	161.46	5.27724	5.27724	2208	66	3.344
162-982A-16H-2-W 66	143.36	161.33	161.48	5.27769	5.27769	1979	26	3.29645
162-982A-16H-2-W 68	143.38	161.35	161.5	5.27814	5.27814	1994	62	3.29973
162-982A-16H-2-W 70	143.4	161.37	161.52	5.27859	5.27859	2004	101	3.3019
162-982A-16H-2-W 72	143.42	161.39	161.54	5.27905	5.27905	1887	55	3.27577
162-982A-16H-2-W 73	143.43	161.4	161.55	5.27927	5.27927	1786	58	3.25188
162-982A-16H-2-W 77	143.47	161.44	161.59	5.28017	5.28017	1986	27	3.29798
162-982A-16H-2-W 78	143.48	161.45	161.6	5.2804	5.2804	1786	82	3.25188
162-982A-16H-2-W 80	143.5	161.47	161.62	5.28085	5.28085	1995	65	3.29994
162-982A-16H-2-W 83	143.53	161.5	161.65	5.28153	5.28153	1887	29	3.27577
162-982A-16H-2-W 84	143.54	161.51	161.66	5.28175	5.28175	1882	56	3.27462
162-982A-16H-2-W 86	143.56	161.53	161.68	5.2822	5.2822	2138	66	3.33001
162-982A-16H-2-W 88	143.58	161.55	161.7	5.28265	5.28265	2248	91	3.3518
162-982A-16H-2-W 89	143.59	161.56	161.71	5.28288	5.28288	2037	68	3.30899
162-982A-16H-2-W 97	143.67	161.64	161.79	5.28468	5.28468	2758	89	3.44059
162-982A-16H-2-W 98	143.68	161.65	161.8	5.28491	5.28491	2660	30	3.42488
162-982A-16H-2-W 100	143.7	161.67	161.82	5.28536	5.28536	2495	70	3.39707
162-982A-16H-2-W 103	143.73	161.7	161.85	5.28604	5.28604	2510	47	3.39967
162-982A-16H-2-W 104	143.74	161.71	161.86	5.28626	5.28626	2484	17	3.39515
162-982A-16H-2-W 106	143.76	161.73	161.88	5.28671	5.28671	2575	127	3.41078
162-982A-16H-2-W 109	143.79	161.76	161.91	5.28739	5.28739	2675	72	3.42732
162-982A-16H-2-W 110	143.8	161.77	161.92	5.28762	5.28762	2799	70	3.447
162-982A-16H-2-W 112	143.82	161.79	161.94	5.28807	5.28807	2815	93	3.44948
162-982A-16H-2-W 114	143.84	161.81	161.96	5.28852	5.28852	2589	64	3.41313
162-982A-16H-2-W 116	143.86	161.83	161.98	5.28897	5.28897	2603	35	3.41547
162-982A-16H-2-W 117	143.87	161.84	161.99	5.2892	5.2892	2669	17	3.42635
162-982A-16H-2-W 121	143.91	161.88	162.03	5.2901	5.2901	2318	74	3.36511
162-982A-16H-2-W 122	143.92	161.89	162.04	5.29032	5.29032	2371	156	3.37493
162-982A-16H-2-W 124	143.94	161.91	162.06	5.29077	5.29077	2367	64	3.3742
162-982A-16H-2-W 126	143.96	161.93	162.08	5.29123	5.29123	2450	98	3.38917
162-982A-16H-2-W 127	143.97	161.94	162.09	5.29145	5.29145	2283	56	3.35851
162-982A-16H-2-W 130	144	161.97	162.12	5.29213	5.29213	2432	78	3.38596
162-982A-16H-2-W 132	144.02	161.99	162.14	5.29258	5.29258	2293	39	3.3604
162-982A-16H-2-W 134	144.04	162.01	162.16	5.29303	5.29303	2260	89	3.35411
162-982A-16H-2-W 135	144.05	162.02	162.17	5.29326	5.29326	2232	70	3.34869
162-982A-16H-2-W 138	144.08	162.05	162.2	5.29393	5.29393	2339	61	3.36903
162-982A-16H-2-W 141	144.11	162.08	162.23	5.29461	5.29461	2405	44	3.38112
162-982A-16H-2-W 142	144.12	162.09	162.24	5.29483	5.29483	2451	17	3.38934
162-982A-16H-2-W 145	144.15	162.12	162.27	5.29551	5.29551	2205	58	3.34341
162-982A-16H-2-W 146	144.16	162.13	162.28	5.29574	5.29574	2434	98	3.38632
162-982A-16H-2-W 148	144.18	162.15	162.3	5.29619	5.29619	2636	95	3.42095
162-982A-16H-2-W 149	144.19	162.16	162.31	5.29641	5.29641	2304	14	3.36248
162-982A-16H-3-W 2	144.22	162.19	162.34	5.29709	5.29709	2641	69	3.42177
162-982A-16H-3-W 4	144.24	162.21	162.36	5.29754	5.29754	2551	56	3.40671
162-982A-16H-3-W 7	144.27	162.24	162.39	5.29822	5.29822	2537	99	3.40432
162-982A-16H-3-W 8	144.28	162.25	162.4	5.29844	5.29844	2483	103	3.39498
162-982A-16H-3-W 9	144.29	162.26	162.41	5.29867	5.29867	2472	114	3.39305
162-982A-16H-3-W 12	144.32	162.29	162.44	5.29935	5.29935	2366	101	3.37401
162-982A-16H-3-W 14	144.34	162.31	162.46	5.2998	5.2998	2222	50	3.34674
162-982A-16H-3-W 15	144.35	162.32	162.47	5.30002	5.30002	2119	99	3.32613
162-982A-16H-3-W 18	144.38	162.35	162.5	5.3007	5.3007	2074	77	3.31681
162-982A-16H-3-W 19	144.39	162.36	162.51	5.30092	5.30092	2173	99	3.33706
162-982A-16H-3-W 22	144.42	162.39	162.54	5.3016	5.3016	2200	73	3.34242
162-982A-16H-3-W 23	144.43	162.4	162.55	5.30183	5.30183	2179	98	3.33826
162-982A-16H-3-W 26	144.46	162.43	162.58	5.3025	5.3025	2544	122	3.40552
162-982A-16H-3-W 28	144.48	162.45	162.6	5.30295	5.30295	2654	63	3.4239
162-982A-16H-3-W 31	144.51	162.48	162.63	5.30363	5.30363	2253	71	3.35276
162-982A-16H-3-W 32	144.52	162.49	162.64	5.30386	5.30386	2409	104	3.38184
162-982A-16H-3-W 33	144.53	162.5	162.65	5.30408	5.30408	2336	119	3.36847
162-982A-16H-3-W 36	144.56	162.53	162.68	5.30476	5.30476	2666	20	3.42586
162-982A-16H-3-W 38	144.58	162.55	162.7	5.30521	5.30521	2554	126	3.40722
162-982A-16H-3-W 41	144.61	162.58	162.73	5.30589	5.30589	2500	63	3.39794
162-982A-16H-3-W 42	144.62	162.59	162.74	5.30611	5.30611	2608	40	3.41631
162-982A-16H-3-W 43	144.63	162.6	162.75	5.30634	5.30634	2665	71	3.4257
162-982A-16H-3-W 44	144.64	162.61	162.76	5.30656	5.30656	2763	107	3.44138
162-982A-16H-3-W 46	144.66	162.63	162.78	5.30702	5.30702	2443	81	3.38792
162-982A-16H-3-W 49	144.69	162.66	162.81	5.30769	5.30769	2621	106	3.41847
162-982A-16H-3-W 50	144.7	162.67	162.82	5.30792	5.30792	2583	93	3.41212
162-982A-16H-3-W 52	144.72	162.69	162.84	5.30837	5.30837	2425	65	3.38471
162-982A-16H-3-W 53	144.73	162.7	162.85	5.30859	5.30859	2384	101	3.37731
162-982A-16H-3-W 56	144.76	162.73	162.88	5.30927	5.30927	2323	83	3.36605
162-982A-16H-3-W 58	144.78	162.75	162.9	5.30972	5.30972	2198	79	3.34203
162-982A-16H-3-W 60	144.8	162.77	162.92	5.31017	5.31017	2207	76	3.3438
162-982A-16H-3-W 63	144.83	162.8	162.95	5.31085	5.31085	2171	114	3.33666
162-982A-16H-3-W 64	144.84	162.81	162.96	5.31108	5.31108	2128	68	3.32797
162-982A-16H-3-W 66	144.86	162.83	162.98	5.31153	5.31153	2129	26	3.32818
162-982A-16H-3-W 67	144.87	162.84	162.99	5.31175	5.31175	2317	104	3.36493
162-982A-16H-3-W 70	144.9	162.87	163.02	5.31243	5.31243	2200	100	3.34242
162-982A-16H-3-W 71	144.91	162.88	163.03	5.31265	5.31265	2142	78	3.33082
162-982A-16H-3-W 74	144.94	162.91	163.06	5.31333	5.31333	2191	71	3.34064
162-982A-16H-3-W 75	144.95	162.92	163.07	5.31356	5.31356	2124	35	3.32715
162-982A-16H-3-W 78	144.98	162.95	163.1	5.31423	5.31423	2095	28	3.32118
162-982A-16H-3-W 79	144.99	162.96	163.11	5.31446	5.31446	2308	111	3.36324
162-982A-16H-3-W 82	145.02	162.99	163.14	5.31514	5.31514	2280	86	3.35793
162-982A-16H-3-W 85	145.05	163.02	163.17	5.31581	5.31581	2024	97	3.30621
162-982A-16H-3-W 86	145.06	163.03	163.18	5.31604	5.31604	2249	48	3.35199
162-982A-16H-3-W 88	145.08	163.05	163.2	5.31649	5.31649	2308	66	3.36324
162-982A-16H-3-W 89	145.09	163.06	163.21	5.31671	5.31671	2148	48	3.33203
162-982A-16H-3-W 92	145.12	163.09	163.24	5.31739	5.31739	2125	75	3.32736
162-982A-16H-3-W 94	145.14	163.11	163.26	5.31784	5.31784	2210	62	3.34439
162-982A-16H-3-W 95	145.15	163.12	163.27	5.31807	5.31807	2400	69	3.38021
162-982A-16H-3-W 98	145.18	163.15	163.3	5.31874	5.31874	2369	72	3.37457
162-982A-16H-3-W 100	145.2	163.17	163.32	5.3192	5.3192	2426	83	3.38489
162-982A-16H-3-W 103	145.23	163.2	163.35	5.31987	5.31987	2454	111	3.38987
162-982A-16H-3-W 104	145.24	163.21	163.36	5.3201	5.3201	2240	76	3.35025
162-982A-16H-3-W 105	145.25	163.22	163.37	5.32032	5.32032	2422	80	3.38417
162-982A-16H-3-W 106	145.26	163.23	163.38	5.32055	5.32055	2549	51	3.40637
162-982A-16H-3-W 108	145.28	163.25	163.4	5.321	5.321	2803	97	3.44762
162-982A-16H-3-W 110	145.3	163.27	163.42	5.32151	5.32149	2513	77	3.40019
162-982A-16H-3-W 112	145.32	163.29	163.44	5.32202	5.32199	2651	51	3.42341
162-982A-16H-3-W 114	145.34	163.31	163.46	5.32252	5.32248	2693	97	3.43024
162-982A-16H-3-W 115	145.35	163.32	163.47	5.32278	5.32273	2506	44	3.39898
162-982A-16H-3-W 117	145.37	163.34	163.49	5.32328	5.32322	2722	81	3.43489
162-982A-16H-3-W 120	145.4	163.37	163.52	5.32405	5.32396	2733	65	3.43664
162-982A-16H-3-W 123	145.43	163.4	163.55	5.32481	5.3247	2542	48	3.40518
162-982A-16H-3-W 124	145.44	163.41	163.56	5.32506	5.32494	2394	87	3.37912
162-982A-16H-3-W 126	145.46	163.43	163.58	5.32557	5.32544	2673	60	3.427
162-982A-16H-3-W 128	145.48	163.45	163.6	5.32608	5.32593	2689	92	3.42959
162-982A-16H-3-W 129	145.49	163.46	163.61	5.32633	5.32618	2874	78	3.45849
162-982A-16H-3-W 132	145.52	163.49	163.64	5.32709	5.32692	2724	102	3.43521
162-982A-16H-3-W 135	145.55	163.52	163.67	5.32785	5.32766	2486	70	3.3955
162-982A-16H-3-W 136	145.56	163.53	163.68	5.32811	5.3279	2700	74	3.43136
162-982A-16H-3-W 137	145.57	163.54	163.69	5.32836	5.32815	2682	58	3.42846
162-982A-16H-3-W 140	145.6	163.57	163.72	5.32912	5.32889	2998	57	3.47683
162-982A-16H-3-W 141	145.61	163.58	163.73	5.32938	5.32914	3066	110	3.48657
162-982A-16H-3-W 144	145.64	163.61	163.76	5.33014	5.32988	2753	163	3.43981
162-982A-16H-3-W 146.5	145.67	163.64	163.79	5.3309	5.33062	2500	83	3.39794
162-982A-16H-3-W 148	145.68	163.65	163.8	5.33115	5.33086	2492	75	3.39655
162-982A-16H-4-W 2	145.72	163.69	163.84	5.33217	5.33185	2857	96	3.45591
162-982A-16H-4-W 4	145.74	163.71	163.86	5.33268	5.33234	3030	12	3.48144
162-982A-16H-4-W 6	145.76	163.73	163.88	5.33318	5.33283	3669	100	3.56455
162-982A-16H-4-W 8	145.78	163.75	163.9	5.33369	5.33333	4506	46	3.65379
162-982A-16H-4-W 10	145.8	163.77	163.92	5.3342	5.33382	3995	100	3.60152
162-982A-16H-4-W 11	145.81	163.78	163.93	5.33445	5.33407	4145	83	3.61752
162-982A-16H-4-W 12	145.82	163.79	163.94	5.33471	5.33431	3837	42	3.58399
162-982A-16H-4-W 14	145.84	163.81	163.96	5.33521	5.33481	4670	104	3.66932
162-982A-16H-4-W 17	145.87	163.84	163.99	5.33598	5.33555	4931	128	3.69294
162-982A-16H-4-W 18	145.88	163.85	164	5.33623	5.33579	4289	125	3.63236
162-982A-16H-4-W 19	145.89	163.86	164.01	5.33648	5.33604	4209	64	3.62418
162-982A-16H-4-W 22	145.92	163.89	164.04	5.33724	5.33678	3873	51	3.58805
162-982A-16H-4-W 24	145.94	163.91	164.06	5.33775	5.33727	4067	75	3.60927
162-982A-16H-4-W 27	145.97	163.94	164.09	5.33851	5.33801	4751	68	3.67679
162-982A-16H-4-W 28	145.98	163.95	164.1	5.33877	5.33826	3797	99	3.57944
162-982A-16H-4-W 29	145.99	163.96	164.11	5.33902	5.3385	3826	39	3.58274
162-982A-16H-4-W 32	146.02	163.99	164.14	5.33978	5.33924	3714	98	3.56984
162-982A-16H-4-W 34	146.04	164.01	164.16	5.34029	5.33974	3563	86	3.55182
162-982A-16H-4-W 37.5	146.08	164.05	164.2	5.34131	5.34072	3204	102	3.50569
162-982A-16H-4-W 39	146.09	164.06	164.21	5.34156	5.34097	3035	50	3.48216
162-982A-16H-4-W 40	146.1	164.07	164.22	5.34181	5.34122	3306	73	3.5193
162-982A-16H-4-W 41	146.11	164.08	164.23	5.34207	5.34146	3697	95	3.56785
162-982A-16H-4-W 42	146.12	164.09	164.24	5.34232	5.34171	3678	100	3.56561
162-982A-16H-4-W 43	146.13	164.1	164.25	5.34257	5.34196	3162	36	3.49996
162-982A-16H-4-W 46	146.16	164.13	164.28	5.34334	5.3427	3236	51	3.51001
162-982A-16H-4-W 48	146.18	164.15	164.3	5.34384	5.34319	3012	31	3.47885
162-982A-16H-4-W 50	146.2	164.17	164.32	5.34435	5.34368	3180	73	3.50243
162-982A-16H-4-W 53	146.23	164.2	164.35	5.34511	5.34442	2945	76	3.46909
162-982A-16H-4-W 54	146.24	164.21	164.36	5.34537	5.34467	2785	44	3.44483
162-982A-16H-4-W 56	146.26	164.23	164.38	5.34587	5.34516	2924	56	3.46598
162-982A-16H-4-W 59	146.29	164.26	164.41	5.34664	5.3459	2894	71	3.4615
162-982A-16H-4-W 60	146.3	164.27	164.42	5.34689	5.34615	2605	75	3.41581
162-982A-16H-4-W 63	146.33	164.3	164.45	5.34765	5.34689	2724	75	3.43521
162-982A-16H-4-W 65.5	146.36	164.33	164.48	5.34841	5.34763	2529	57	3.40295
162-982A-16H-4-W 67	146.37	164.34	164.49	5.34867	5.34787	2696	57	3.43072
162-982A-16H-4-W 68	146.38	164.35	164.5	5.34892	5.34812	2721	44	3.43473
162-982A-16H-4-W 71	146.41	164.38	164.53	5.34968	5.34886	2706	61	3.43233
162-982A-16H-4-W 72	146.42	164.39	164.54	5.34994	5.34911	2867	83	3.45743
162-982A-16H-4-W 75	146.45	164.42	164.57	5.3507	5.34985	2814	71	3.44932
162-982A-16H-4-W 76	146.46	164.43	164.58	5.35095	5.35009	2995	52	3.4764
162-982A-16H-4-W 78	146.48	164.45	164.6	5.35146	5.35059	3097	63	3.49094
162-982A-16H-4-W 80	146.5	164.47	164.62	5.35197	5.35108	3148	28	3.49803
162-982A-16H-4-W 82	146.52	164.49	164.64	5.35247	5.35157	3155	90	3.499
162-982A-16H-4-W 83	146.53	164.5	164.65	5.35273	5.35182	2967	69	3.47232
162-982A-16H-4-W 84	146.54	164.51	164.66	5.35298	5.35207	2847	57	3.45439
162-982A-16H-4-W 86	146.56	164.53	164.68	5.35349	5.35256	2940	136	3.46835
162-982A-16H-4-W 87	146.57	164.54	164.69	5.35374	5.3528	2789	60	3.44545
162-982A-16H-4-W 91	146.61	164.58	164.73	5.35476	5.35379	2477	77	3.39393
162-982A-16H-4-W 92	146.62	164.59	164.74	5.35501	5.35404	2056	107	3.31302
162-982A-16H-4-W 94	146.64	164.61	164.76	5.35552	5.35453	2379	57	3.37639
162-982A-16H-4-W 96	146.66	164.63	164.78	5.35603	5.35502	2423	67	3.38435
162-982A-16H-4-W 98	146.68	164.65	164.8	5.35653	5.35552	2266	77	3.35526
162-982A-16H-4-W 99	146.69	164.66	164.81	5.35679	5.35576	2264	50	3.35488
162-982A-16H-4-W 100	146.7	164.67	164.82	5.35704	5.35601	2674	74	3.42716
162-982A-16H-4-W 102	146.72	164.69	164.84	5.35755	5.3565	2393	65	3.37894
162-982A-16H-4-W 104	146.74	164.71	164.86	5.35806	5.357	2658	73	3.42455
162-982A-16H-4-W 106	146.76	164.73	164.88	5.35856	5.35749	2168	99	3.33606
162-982A-16H-4-W 108	146.78	164.75	164.9	5.35907	5.35798	2466	47	3.39199
162-982A-16H-4-W 109	146.79	164.76	164.91	5.35933	5.35823	2575	43	3.41078
162-982A-16H-4-W 112	146.82	164.79	164.94	5.36009	5.35897	2001	91	3.30125
162-982A-16H-4-W 115	146.85	164.82	164.97	5.36085	5.35971	2378	56	3.37621
162-982A-16H-4-W 116	146.86	164.83	164.98	5.3611	5.35995	2551	115	3.40671
162-982A-16H-4-W 118	146.88	164.85	165	5.36161	5.36045	2620	64	3.4183
162-982A-16H-4-W 119	146.89	164.86	165.01	5.36186	5.36069	2303	118	3.36229
162-982A-16H-4-W 123	146.93	164.9	165.05	5.36288	5.36168	2137	103	3.3298
162-982A-16H-4-W 124	146.94	164.91	165.06	5.36313	5.36193	2232	58	3.34869
162-982A-16H-4-W 126	146.96	164.93	165.08	5.36364	5.36242	2380	101	3.37658
162-982A-16H-4-W 128	146.98	164.95	165.1	5.36415	5.36291	2636	101	3.42095
162-982A-16H-4-W 130	147	164.97	165.12	5.36466	5.36341	2660	93	3.42488
162-982A-16H-4-W 131	147.01	164.98	165.13	5.36491	5.36365	2509	18	3.3995
162-982A-16H-4-W 133.5	147.04	165.01	165.16	5.36567	5.36439	2354	89	3.37181
162-982A-16H-4-W 134	147.04	165.01	165.16	5.36567	5.36439	2298	104	3.36135
162-982A-16H-4-W 135.5	147.06	165.03	165.18	5.36618	5.36489	2523	48	3.40192
162-982A-16H-4-W 139	147.09	165.06	165.21	5.36694	5.36563	2490	77	3.3962
162-982A-16H-4-W 140	147.1	165.07	165.22	5.36719	5.36587	2388	57	3.37803
162-982A-16H-4-W 142	147.12	165.09	165.24	5.3677	5.36636	2356	69	3.37218
162-982A-16H-4-W 144	147.14	165.11	165.26	5.36821	5.36686	2278	58	3.35755
162-982A-16H-4-W 148	147.18	165.15	165.3	5.36923	5.36784	2369	55	3.37457
162-982A-16H-5-W 2	147.22	165.19	165.34	5.37024	5.36883	2562	77	3.40858
162-982A-16H-5-W 4	147.24	165.21	165.36	5.37075	5.36932	2767	26	3.44201
162-982A-16H-5-W 7	147.27	165.24	165.39	5.37151	5.37006	2850	76	3.45484
162-982A-16H-5-W 8	147.28	165.25	165.4	5.37176	5.37031	2939	85	3.4682
162-982A-16H-5-W 9	147.29	165.26	165.41	5.37202	5.37056	2568	34	3.4096
162-982A-16H-5-W 13.5	147.34	165.31	165.46	5.37329	5.37179	2753	111	3.43981
162-982A-16H-5-W 15	147.35	165.32	165.47	5.37354	5.37204	2579	97	3.41145
162-982A-16H-5-W 16	147.36	165.33	165.48	5.37379	5.37228	2446	30	3.38846
162-982A-16H-5-W 17	147.37	165.34	165.49	5.37405	5.37253	2637	61	3.42111
162-982A-16H-5-W 20	147.4	165.37	165.52	5.37481	5.37327	2829	64	3.45163
162-982A-16H-5-W 22	147.42	165.39	165.54	5.37532	5.37376	2670	100	3.42651
162-982A-16H-5-W 24	147.44	165.41	165.56	5.37582	5.37425	2445	24	3.38828
162-982A-16H-5-W 27	147.47	165.44	165.59	5.37659	5.37499	2914	68	3.46449
162-982A-16H-5-W 30	147.5	165.47	165.62	5.37735	5.37573	2324	25	3.36624
162-982A-16H-5-W 32	147.52	165.49	165.64	5.37785	5.37623	2555	131	3.40739
162-982A-16H-5-W 33	147.53	165.5	165.65	5.37811	5.37647	2463	14	3.39146
162-982A-16H-5-W 36	147.56	165.53	165.68	5.37887	5.37721	2305	115	3.36267
162-982A-16H-5-W 37	147.57	165.54	165.69	5.37912	5.37746	2376	126	3.37585
162-982A-16H-5-W 39	147.59	165.56	165.71	5.37963	5.37795	2654	66	3.4239
162-982A-16H-5-W 40	147.6	165.57	165.72	5.37989	5.3782	2717	75	3.43409
162-982A-16H-5-W 43	147.63	165.6	165.75	5.38065	5.37894	2206	89	3.34361
162-982A-16H-5-W 44	147.64	165.61	165.76	5.3809	5.37919	2354	65	3.37181
162-982A-16H-5-W 46	147.66	165.63	165.78	5.38141	5.37968	2633	67	3.42045
162-982A-16H-5-W 48.5	147.69	165.66	165.81	5.38217	5.38042	2072	85	3.31639
162-982A-16H-5-W 51	147.71	165.68	165.83	5.38268	5.38091	2124	94	3.32715
162-982A-16H-5-W 52	147.72	165.69	165.84	5.38293	5.38116	2470	128	3.3927
162-982A-16H-5-W 53	147.73	165.7	165.85	5.38319	5.3814	2097	110	3.3216
162-982A-16H-5-W 54	147.74	165.71	165.86	5.38344	5.38165	2305	56	3.36267
162-982A-16H-5-W 56	147.76	165.73	165.88	5.38395	5.38214	2141	73	3.33062
162-982A-16H-5-W 57	147.77	165.74	165.89	5.3842	5.38239	2341	47	3.3694
162-982A-16H-5-W 59.5	147.8	165.77	165.92	5.38496	5.38313	2471	107	3.39287
162-982A-16H-5-W 62	147.82	165.79	165.94	5.38547	5.38362	2380	75	3.37658
162-982A-16H-5-W 64	147.84	165.81	165.96	5.38598	5.38412	2500	63	3.39794
162-982A-16H-5-W 66	147.86	165.83	165.98	5.38648	5.38461	3001	53	3.47727
162-982A-16H-5-W 68	147.88	165.85	166	5.38699	5.3851	2864	30	3.45697
162-982A-16H-5-W 70	147.9	165.87	166.02	5.3875	5.3856	2687	115	3.42927
162-982A-16H-5-W 71	147.91	165.88	166.03	5.38775	5.38584	2660	38	3.42488
162-982A-16H-5-W 74	147.94	165.91	166.06	5.38852	5.38658	2593	57	3.4138
162-982A-16H-5-W 75	147.95	165.92	166.07	5.38877	5.38683	2443	87	3.38792
162-982A-16H-5-W 77.5	147.98	165.95	166.1	5.38953	5.38757	2562	106	3.40858
162-982A-16H-5-W 80	148	165.97	166.12	5.39004	5.38806	2942	130	3.46864
162-982A-16H-5-W 81	148.01	165.98	166.13	5.39029	5.38831	2722	72	3.43489
162-982A-16H-5-W 86	148.06	166.03	166.18	5.39156	5.38954	2613	28	3.41714
162-982A-16H-5-W 88	148.08	166.05	166.2	5.39207	5.39003	2955	80	3.47056
162-982A-16H-5-W 89	148.09	166.06	166.21	5.39232	5.39028	2853	81	3.4553
162-982A-16H-5-W 92	148.12	166.09	166.24	5.39308	5.39102	3093	90	3.49038
162-982A-16H-5-W 94	148.14	166.11	166.26	5.39359	5.39151	2820	120	3.45025
162-982A-16H-5-W 95	148.15	166.12	166.27	5.39385	5.39176	2530	87	3.40312
162-982A-16H-5-W 98	148.18	166.15	166.3	5.39461	5.3925	2765	107	3.4417
162-982A-16H-5-W 100	148.2	166.17	166.32	5.39511	5.39299	2869	105	3.45773
162-982A-16H-5-W 102	148.22	166.19	166.34	5.39562	5.39349	3437	93	3.53618
162-982A-16H-5-W 105	148.25	166.22	166.37	5.39638	5.39422	3278	118	3.51561
162-982A-16H-5-W 106	148.26	166.23	166.38	5.39664	5.39447	3333	111	3.52284
162-982A-16H-5-W 108	148.28	166.25	166.4	5.39715	5.39496	3373	58	3.52802
162-982A-16H-5-W 110	148.3	166.27	166.42	5.39765	5.39546	3277	74	3.51548
162-982A-16H-5-W 111	148.31	166.28	166.43	5.39791	5.3957	3564	103	3.55194
162-982A-16H-5-W 114	148.34	166.31	166.46	5.39867	5.39644	4405	148	3.64395
162-982A-16H-5-W 116	148.36	166.33	166.48	5.39918	5.39694	4900	128	3.6902
162-982A-16H-5-W 118	148.38	166.35	166.5	5.39968	5.39743	4447	136	3.64807
162-982A-16H-5-W 119	148.39	166.36	166.51	5.39994	5.39768	5654	155	3.75236
162-982A-16H-5-W 122	148.42	166.39	166.54	5.4007	5.39842	5165	162	3.71307
162-982A-16H-5-W 123	148.43	166.4	166.55	5.40095	5.39866	7088	283	3.85052
162-982A-16H-5-W 126	148.46	166.43	166.58	5.40171	5.3994	6930	280	3.84073
162-982A-16H-5-W 129	148.49	166.46	166.61	5.40248	5.40014	7664	246	3.88446
162-982A-16H-5-W 130	148.5	166.47	166.62	5.40273	5.40039	8328	243	3.92054
162-982A-16H-5-W 132	148.52	166.49	166.64	5.40324	5.40088	6442	180	3.80902
162-982A-16H-5-W 134.5	148.55	166.52	166.67	5.404	5.40162	7416	196	3.87017
162-982A-16H-5-W 137	148.57	166.54	166.69	5.40451	5.40211	8366	264	3.92252
162-982A-16H-5-W 138	148.58	166.55	166.7	5.40476	5.40236	7847	232	3.8947
162-982A-16H-5-W 140	148.6	166.57	166.72	5.40527	5.40285	4405	232	3.96544
162-982A-16H-5-W 142	148.62	166.59	166.74	5.40577	5.40335	4405	129	4.01351
162-982A-16H-5-W 145	148.65	166.62	166.77	5.40654	5.40409	4405	129	4.1038
162-982A-16H-5-W 146	148.66	166.63	166.78	5.40679	5.40433	4405	129	4.12011
162-982A-16H-5-W 148	148.68	166.65	166.8	5.4073	5.40483	4405	129	4.11458
162-982A-16H-6-W 2	148.72	166.69	166.84	5.40831	5.40581	4405	129	3.64395
162-982A-16H-6-W 4	148.74	166.71	166.86	5.40882	5.40631	4405	129	3.64395
162-982A-16H-6-W 7	148.77	166.74	166.89	5.40958	5.40705	4405	132	3.64395
162-982A-16H-6-W 8	148.78	166.75	166.9	5.40984	5.40729	4405	132	3.64395
162-982A-16H-6-W 11	148.81	166.78	166.93	5.4106	5.40803	4405	132	3.64395
162-982A-16H-6-W 13	148.83	166.8	166.95	5.4111	5.40852	5718	90	3.75724
162-982A-16H-6-W 14	148.84	166.81	166.96	5.41136	5.40877	4405	132	3.95007
162-982A-16H-6-W 16.5	148.87	166.84	166.99	5.41212	5.40951	4405	132	4.1122
162-982A-16H-6-W 19	148.89	166.86	167.01	5.41263	5.41	3421	82	3.53415
162-982A-16H-6-W 20	148.9	166.87	167.02	5.41288	5.41025	2879	88	3.45924
162-982A-16H-6-W 22	148.92	166.89	167.04	5.41339	5.41074	3239	129	3.51041
162-982A-16H-6-W 24.5	148.95	166.92	167.07	5.41415	5.41148	3569	42	3.55255
162-982A-16H-6-W 27	148.97	166.94	167.09	5.41466	5.41198	3024	132	3.48058
162-982A-16H-6-W 28	148.98	166.95	167.1	5.41491	5.41222	3214	43	3.50705
162-982A-16H-6-W 29	148.99	166.96	167.11	5.41517	5.41247	3083	61	3.48897
162-982A-16H-6-W 32	149.02	166.99	167.14	5.41593	5.41321	2439	51	3.38721
162-982A-16H-6-W 35	149.05	167.02	167.17	5.41669	5.41395	2747	53	3.43886
162-982A-16H-6-W 36	149.06	167.03	167.18	5.41694	5.4142	2260	81	3.35411
162-982A-16H-6-W 37	149.07	167.04	167.19	5.4172	5.41444	2465	82	3.39182
162-982A-16H-6-W 40	149.1	167.07	167.22	5.41796	5.41518	2437	112	3.38686
162-982A-16H-6-W 42	149.12	167.09	167.24	5.41847	5.41567	2744	81	3.43838
162-982A-16H-6-W 46	149.16	167.13	167.28	5.41948	5.41666	2801	72	3.44731
162-982A-16H-6-W 47	149.17	167.14	167.29	5.41973	5.41691	2863	59	3.45682
162-982A-16H-6-W 49	149.19	167.16	167.31	5.42024	5.4174	3501	106	3.54419
162-982A-16H-6-W 52	149.22	167.19	167.34	5.421	5.41814	3707	43	3.56902
162-982A-16H-6-W 53	149.23	167.2	167.35	5.42126	5.41839	3295	27	3.51786
162-982A-16H-6-W 57	149.27	167.24	167.39	5.42227	5.41937	3394	84	3.53071
162-982A-16H-6-W 58	149.28	167.25	167.4	5.42253	5.41962	3606	139	3.55703
162-982A-16H-6-W 61	149.31	167.28	167.43	5.42329	5.42036	3669	69	3.56455
162-982A-16H-6-W 62	149.32	167.29	167.44	5.42354	5.42061	3645	63	3.5617
162-982A-16H-6-W 65	149.35	167.32	167.47	5.4243	5.42135	3333	85	3.52284
162-982A-16H-6-W 66	149.36	167.33	167.48	5.42456	5.42159	3298	67	3.51825
162-982A-16H-6-W 68	149.38	167.35	167.5	5.42506	5.42208	2985	100	3.47494
162-982A-16H-6-W 69	149.39	167.36	167.51	5.42532	5.42233	2889	108	3.46075
162-982A-16H-6-W 72	149.42	167.39	167.54	5.42608	5.42307	3025	69	3.48073
162-982A-16H-6-W 74	149.44	167.41	167.56	5.42659	5.42356	2972	-2	3.47305
162-982A-16H-6-W 76	149.46	167.43	167.58	5.4271	5.42406	3014	74	3.47914
162-982A-16H-6-W 79	149.49	167.46	167.61	5.42786	5.4248	2746	102	3.4387
162-982A-16H-6-W 80	149.5	167.47	167.62	5.42811	5.42504	2784	92	3.44467
162-982A-16H-6-W 83	149.53	167.5	167.65	5.42887	5.42578	3129	70	3.49541
162-982A-16H-6-W 84	149.54	167.51	167.66	5.42913	5.42603	2768	100	3.44217
162-982A-16H-6-W 86	149.56	167.53	167.68	5.42963	5.42652	2916	76	3.46479
162-982A-16H-6-W 88	149.58	167.55	167.7	5.43014	5.42702	2962	58	3.47159
162-982A-16H-6-W 91	149.61	167.58	167.73	5.4309	5.42776	2752	109	3.43965
162-982A-16H-6-W 92	149.62	167.59	167.74	5.43116	5.428	2800	65	3.44716
162-982A-16H-6-W 94	149.64	167.61	167.76	5.43166	5.4285	2915	88	3.46464
162-982A-16H-6-W 95	149.65	167.62	167.77	5.43192	5.42874	2592	86	3.41363
162-982A-16H-6-W 98	149.68	167.65	167.8	5.43268	5.42948	2580	76	3.41162
162-982A-16H-6-W 100	149.7	167.67	167.82	5.43319	5.42997	2800	87	3.44716
162-982A-16H-6-W 101	149.71	167.68	167.83	5.43344	5.43022	2648	42	3.42292
162-982A-16H-6-W 102	149.72	167.69	167.84	5.43369	5.43047	2691	76	3.42991
162-982A-16H-6-W 104	149.74	167.71	167.86	5.4342	5.43096	2791	90	3.44576
162-982A-16H-6-W 106	149.76	167.73	167.88	5.43471	5.43145	3036	81	3.4823
162-982A-16H-6-W 108	149.78	167.75	167.9	5.43522	5.43195	3147	57	3.4979
162-982A-16H-6-W 109	149.79	167.76	167.91	5.43547	5.43219	3242	96	3.51081
162-982A-16H-6-W 112	149.82	167.79	167.94	5.43623	5.43293	3057	115	3.4853
162-982A-16H-6-W 114	149.84	167.81	167.96	5.43674	5.43343	3198	94	3.50488
162-982A-16H-6-W 117	149.87	167.84	167.99	5.4375	5.43417	3321	52	3.52127
162-982A-16H-6-W 118	149.88	167.85	168	5.43776	5.43441	3539	87	3.54888
162-982A-16H-6-W 120	149.9	167.87	168.02	5.43826	5.43491	3369	35	3.5275
162-982A-16H-6-W 121	149.91	167.88	168.03	5.43852	5.43515	3395	82	3.53084
162-982A-16H-6-W 124	149.94	167.91	168.06	5.43928	5.43589	3405	109	3.53212
162-982A-16H-6-W 126	149.96	167.93	168.08	5.43979	5.43638	3598	78	3.55606
162-982A-16H-6-W 127	149.97	167.94	168.09	5.44004	5.43663	3273	74	3.51495
162-982A-16H-6-W 130	150	167.97	168.12	5.4408	5.43737	2955	63	3.47056
162-982A-16H-6-W 131	150.01	167.98	168.13	5.44106	5.43762	3244	28	3.51108
162-982A-16H-6-W 134	150.04	168.01	168.16	5.44182	5.43836	3078	33	3.48827
162-982A-16H-6-W 137	150.07	168.04	168.19	5.44258	5.4391	2752	46	3.43965
162-982A-16H-6-W 138	150.08	168.05	168.2	5.44283	5.43934	2668	115	3.42619
162-982A-16H-6-W 139	150.09	168.06	168.21	5.44309	5.43959	2544	63	3.40552
162-982A-16H-6-W 142	150.12	168.09	168.24	5.44385	5.44033	2420	118	3.38382
162-982A-16H-6-W 144	150.14	168.11	168.26	5.44435	5.44082	2405	64	3.38112
162-982A-16H-6-W 147	150.17	168.14	168.29	5.44512	5.44156	2151	39	3.33264
162-982A-16H-6-W 148	150.18	168.15	168.3	5.44537	5.44181	2393	32	3.37894
162-982A-16H-6-W 149	150.19	168.16	168.31	5.44562	5.44206	2197	68	3.34183
162-982A-17H-1-W 40	151.1	169.95	170.1	5.49106	5.48089	1993	49	3.29951
162-982A-17H-1-W 41	151.11	169.96	170.11	5.49131	5.48111	2002	32	3.30146
162-982A-17H-1-W 42	151.12	169.97	170.12	5.49156	5.48132	1850	27	3.26717
162-982A-17H-1-W 44	151.14	169.99	170.14	5.49207	5.48175	1752	94	3.24353
162-982A-17H-1-W 45	151.15	170	170.15	5.49233	5.48196	1566	63	3.19479
162-982A-17H-1-W 48	151.18	170.03	170.18	5.49309	5.48261	1831	33	3.26269
162-982A-17H-1-W 50	151.2	170.05	170.2	5.4936	5.48304	1804	53	3.25624
162-982A-17H-1-W 51	151.21	170.06	170.21	5.49385	5.48325	1785	108	3.25164
162-982A-17H-1-W 54	151.24	170.09	170.24	5.49461	5.48389	1750	87	3.24304
162-982A-17H-1-W 56	151.26	170.11	170.26	5.49512	5.48432	1960	91	3.29226
162-982A-17H-1-W 58	151.28	170.13	170.28	5.49563	5.48475	1772	91	3.24846
162-982A-17H-1-W 59	151.29	170.14	170.29	5.49588	5.48496	2012	45	3.30363
162-982A-17H-1-W 62	151.32	170.17	170.32	5.49664	5.4856	1904	77	3.27967
162-982A-17H-1-W 64	151.34	170.19	170.34	5.49715	5.48603	1977	52	3.29601
162-982A-17H-1-W 65	151.35	170.2	170.35	5.4974	5.48625	2404	74	3.38093
162-982A-17H-1-W 68	151.38	170.23	170.38	5.49816	5.48689	1865	94	3.27068
162-982A-17H-1-W 70	151.4	170.25	170.4	5.49867	5.48732	1814	28	3.25864
162-982A-17H-1-W 73	151.43	170.28	170.43	5.49943	5.48796	1655	77	3.2188
162-982A-17H-1-W 74	151.44	170.29	170.44	5.49969	5.48817	1918	71	3.28285
162-982A-17H-1-W 76	151.46	170.31	170.46	5.50019	5.4886	1744	61	3.24155
162-982A-17H-1-W 79	151.49	170.34	170.49	5.50096	5.48924	1650	18	3.21748
162-982A-17H-1-W 80	151.5	170.35	170.5	5.50121	5.48946	1702	64	3.23096
162-982A-17H-1-W 82	151.52	170.37	170.52	5.50172	5.48989	1852	80	3.26764
162-982A-17H-1-W 85	151.55	170.4	170.55	5.50248	5.49053	1903	29	3.27944
162-982A-17H-1-W 86	151.56	170.41	170.56	5.50273	5.49074	1714	21	3.23401
162-982A-17H-1-W 88	151.58	170.43	170.58	5.50324	5.49117	1876	68	3.27323
162-982A-17H-1-W 89	151.59	170.44	170.59	5.50349	5.49138	1883	75	3.27485
162-982A-17H-1-W 94	151.64	170.49	170.64	5.50476	5.49245	1959	52	3.29203
162-982A-17H-1-W 96	151.66	170.51	170.66	5.50527	5.49288	1802	31	3.25575
162-982A-17H-1-W 98	151.68	170.53	170.68	5.50578	5.49331	1851	-8	3.26741
162-982A-17H-1-W 99	151.69	170.54	170.69	5.50603	5.49352	2050	100	3.31175
162-982A-17H-1-W 102	151.72	170.57	170.72	5.50679	5.49417	1854	48	3.26811
162-982A-17H-1-W 104	151.74	170.59	170.74	5.5073	5.4946	1762	70	3.24601
162-982A-17H-1-W 106	151.76	170.61	170.76	5.50781	5.49502	1818	70	3.25959
162-982A-17H-1-W 108	151.78	170.63	170.78	5.50832	5.49545	1974	68	3.29535
162-982A-17H-1-W 109	151.79	170.64	170.79	5.50857	5.49567	1872	60	3.27231
162-982A-17H-1-W 113	151.83	170.68	170.83	5.50959	5.49652	1925	87	3.28443
162-982A-17H-1-W 114	151.84	170.69	170.84	5.50984	5.49674	2109	86	3.32408
162-982A-17H-1-W 116	151.86	170.71	170.86	5.51035	5.49716	2587	104	3.4128
162-982A-17H-1-W 120	151.9	170.75	170.9	5.51136	5.49802	2364	55	3.37365
162-982A-17H-1-W 122	151.92	170.77	170.92	5.51187	5.49845	2200	41	3.34242
162-982A-17H-1-W 123	151.93	170.78	170.93	5.51212	5.49866	2101	18	3.32243
162-982A-17H-1-W 126	151.96	170.81	170.96	5.51289	5.4993	2115	24	3.32531
162-982A-17H-1-W 128	151.98	170.83	170.98	5.51339	5.49973	2563	107	3.40875
162-982A-17H-1-W 131	152.01	170.86	171.01	5.51415	5.50038	2655	68	3.42406
162-982A-17H-1-W 132	152.02	170.87	171.02	5.51441	5.50059	2636	55	3.42095
162-982A-17H-1-W 134	152.04	170.89	171.04	5.51492	5.50102	2799	87	3.447
162-982A-17H-1-W 137	152.07	170.92	171.07	5.51568	5.50166	2620	38	3.4183
162-982A-17H-1-W 140	152.1	170.95	171.1	5.51644	5.5023	2413	92	3.38256
162-982A-17H-1-W 141	152.11	170.96	171.11	5.51669	5.50252	2832	71	3.45209
162-982A-17H-1-W 142	152.12	170.97	171.12	5.51695	5.50273	2724	52	3.43521
162-982A-17H-1-W 144	152.14	170.99	171.14	5.51745	5.50316	2673	62	3.427
162-982A-17H-1-W 146	152.16	171.01	171.16	5.51796	5.50359	3047	74	3.48387
162-982A-17H-1-W 148	152.18	171.03	171.18	5.51847	5.50401	3107	19	3.49234
162-982A-17H-2-W 2	152.22	171.07	171.22	5.51948	5.50487	3385	59	3.52956
162-982A-17H-2-W 4	152.24	171.09	171.24	5.51999	5.5053	3604	64	3.55678
162-982A-17H-2-W 6	152.26	171.11	171.26	5.5205	5.50573	3562	90	3.55169
162-982A-17H-2-W 8	152.28	171.13	171.28	5.52101	5.50616	4204	149	3.62366
162-982A-17H-2-W 9	152.29	171.14	171.29	5.52126	5.50637	3981	84	3.59999
162-982A-17H-2-W 13.5	152.34	171.19	171.34	5.52253	5.50744	3596	104	3.55582
162-982A-17H-2-W 15	152.35	171.2	171.35	5.52278	5.50765	3805	82	3.58035
162-982A-17H-2-W 16	152.36	171.21	171.36	5.52304	5.50787	3647	55	3.56194
162-982A-17H-2-W 19	152.39	171.24	171.39	5.5238	5.50851	3692	75	3.56726
162-982A-17H-2-W 20	152.4	171.25	171.4	5.52405	5.50872	3919	121	3.59318
162-982A-17H-2-W 22	152.42	171.27	171.42	5.52456	5.50915	3653	27	3.56265
162-982A-17H-2-W 24	152.44	171.29	171.44	5.52507	5.50958	3513	64	3.54568
162-982A-17H-2-W 26	152.46	171.31	171.46	5.52558	5.51001	3475	-18	3.54095
162-982A-17H-2-W 29	152.49	171.34	171.49	5.52634	5.51065	3603	124	3.55666
162-982A-17H-2-W 30	152.5	171.35	171.5	5.52659	5.51087	3529	85	3.54765
162-982A-17H-2-W 31	152.51	171.36	171.51	5.52685	5.51108	3652	58	3.56253
162-982A-17H-2-W 34	152.54	171.39	171.54	5.52761	5.51172	3389	82	3.53007
162-982A-17H-2-W 36	152.56	171.41	171.56	5.52811	5.51215	3772	62	3.57657
162-982A-17H-2-W 38	152.58	171.43	171.58	5.52862	5.51258	3481	79	3.5417
162-982A-17H-2-W 40	152.6	171.45	171.6	5.52913	5.51301	3317	71	3.52075
162-982A-17H-2-W 41	152.61	171.46	171.61	5.52938	5.51322	3209	95	3.50637
162-982A-17H-2-W 44	152.64	171.49	171.64	5.53015	5.51386	3274	89	3.51508
162-982A-17H-2-W 45	152.65	171.5	171.65	5.5304	5.51408	2863	80	3.45682
162-982A-17H-2-W 48	152.68	171.53	171.68	5.53116	5.51472	3241	52	3.51068
162-982A-17H-2-W 50	152.7	171.55	171.7	5.53167	5.51515	3060	65	3.48572
162-982A-17H-2-W 52	152.72	171.57	171.72	5.53218	5.51557	3124	101	3.49471
162-982A-17H-2-W 55	152.75	171.6	171.75	5.53294	5.51622	3132	67	3.49582
162-982A-17H-2-W 56	152.76	171.61	171.76	5.53319	5.51643	3021	81	3.48015
162-982A-17H-2-W 58	152.78	171.63	171.78	5.5337	5.51686	2742	32	3.43807
162-982A-17H-2-W 60	152.8	171.65	171.8	5.53421	5.51729	2530	113	3.40312
162-982A-17H-2-W 63	152.83	171.68	171.83	5.53497	5.51793	2656	113	3.42423
162-982A-17H-2-W 64	152.84	171.69	171.84	5.53522	5.51814	2708	125	3.43265
162-982A-17H-2-W 66	152.86	171.71	171.86	5.53573	5.51857	2666	51	3.42586
162-982A-17H-2-W 69	152.89	171.74	171.89	5.53649	5.51934	2487	58	3.39568
162-982A-17H-2-W 71	152.91	171.76	171.91	5.537	5.52002	2681	38	3.4283
162-982A-17H-2-W 72	152.92	171.77	171.92	5.53725	5.52036	2506	92	3.39898
162-982A-17H-2-W 75	152.95	171.8	171.95	5.53801	5.52138	2233	63	3.34889
162-982A-17H-2-W 76	152.96	171.81	171.96	5.53827	5.52172	2436	69	3.38668
162-982A-17H-2-W 79	152.99	171.84	171.99	5.53903	5.52274	2231	83	3.3485
162-982A-17H-2-W 80	153	171.85	172	5.53928	5.52308	2188	104	3.34005
162-982A-17H-2-W 81.5	153.02	171.87	172.02	5.53979	5.52376	2459	75	3.39076
162-982A-17H-2-W 84	153.04	171.89	172.04	5.5403	5.52444	2724	96	3.43521
162-982A-17H-2-W 86	153.06	171.91	172.06	5.54081	5.52512	2680	72	3.42813
162-982A-17H-2-W 90	153.1	171.95	172.1	5.54182	5.52648	2794	12	3.44623
162-982A-17H-2-W 92	153.12	171.97	172.12	5.54233	5.52716	2824	79	3.45086
162-982A-17H-2-W 93	153.13	171.98	172.13	5.54258	5.5275	2931	64	3.46702
162-982A-17H-2-W 96	153.16	172.01	172.16	5.54334	5.52852	2918	71	3.46509
162-982A-17H-2-W 98	153.18	172.03	172.18	5.54385	5.5292	3116	46	3.4936
162-982A-17H-2-W 101	153.21	172.06	172.21	5.54461	5.53022	3063	94	3.48615
162-982A-17H-2-W 102	153.22	172.07	172.22	5.54487	5.53056	2872	112	3.45818
162-982A-17H-2-W 103	153.23	172.08	172.23	5.54512	5.5309	2550	112	3.40654
162-982A-17H-2-W 106	153.26	172.11	172.26	5.54588	5.53192	2758	63	3.44059
162-982A-17H-2-W 108	153.28	172.13	172.28	5.54639	5.5326	2639	37	3.42144
162-982A-17H-2-W 109	153.29	172.14	172.29	5.54664	5.53294	2301	42	3.36192
162-982A-17H-2-W 112	153.32	172.17	172.32	5.5474	5.53396	2704	117	3.43201
162-982A-17H-2-W 113	153.33	172.18	172.33	5.54766	5.5343	2631	27	3.42012
162-982A-17H-2-W 116	153.36	172.21	172.36	5.54842	5.53532	2740	79	3.43775
162-982A-17H-2-W 117	153.37	172.22	172.37	5.54867	5.53566	2671	110	3.42667
162-982A-17H-2-W 121	153.41	172.26	172.41	5.54969	5.53702	2556	35	3.40756
162-982A-17H-2-W 122	153.42	172.27	172.42	5.54994	5.53736	2679	95	3.42797
162-982A-17H-2-W 123	153.43	172.28	172.43	5.5502	5.5377	2877	75	3.45894
162-982A-17H-2-W 126	153.46	172.31	172.46	5.55096	5.53872	3206	128	3.50596
162-982A-17H-2-W 128	153.48	172.33	172.48	5.55147	5.5394	2572	105	3.41027
162-982A-17H-2-W 130	153.5	172.35	172.5	5.55197	5.54008	3007	55	3.47813
162-982A-17H-2-W 132	153.52	172.37	172.52	5.55248	5.54076	3066	48	3.48657
162-982A-17H-2-W 135	153.55	172.4	172.55	5.55324	5.54178	3056	100	3.48515
162-982A-17H-2-W 136	153.56	172.41	172.56	5.5535	5.54212	2849	89	3.45469
162-982A-17H-2-W 138	153.58	172.43	172.58	5.554	5.5428	3140	62	3.49693
162-982A-17H-2-W 140	153.6	172.45	172.6	5.55451	5.54348	3450	91	3.53782
162-982A-17H-2-W 143	153.63	172.48	172.63	5.55527	5.5445	3149	34	3.49817
162-982A-17H-2-W 144	153.64	172.49	172.64	5.55553	5.54484	3183	109	3.50284
162-982A-17H-2-W 146	153.66	172.51	172.66	5.55603	5.54552	3132	94	3.49582
162-982A-17H-2-W 148	153.68	172.53	172.68	5.55654	5.5462	3535	102	3.54839
162-982A-17H-3-W 2	153.72	172.57	172.72	5.55756	5.54756	4593	77	3.6621
162-982A-17H-3-W 4	153.74	172.59	172.74	5.55806	5.54824	4252	134	3.62859
162-982A-17H-3-W 6	153.76	172.61	172.76	5.55857	5.54892	4278	77	3.63124
162-982A-17H-3-W 8	153.78	172.63	172.78	5.55908	5.5496	5450	76	3.7364
162-982A-17H-3-W 10	153.8	172.65	172.8	5.55959	5.55028	5574	126	3.74617
162-982A-17H-3-W 13	153.83	172.68	172.83	5.56035	5.5513	5864	60	3.76819
162-982A-17H-3-W 14	153.84	172.69	172.84	5.5606	5.55164	5773	125	3.7614
162-982A-17H-3-W 16	153.86	172.71	172.86	5.56111	5.55232	5329	78	3.72665
162-982A-17H-3-W 19	153.89	172.74	172.89	5.56187	5.55334	4974	124	3.69671
162-982A-17H-3-W 20	153.9	172.75	172.9	5.56213	5.55368	5226	46	3.71817
162-982A-17H-3-W 23	153.93	172.78	172.93	5.56289	5.5547	5569	78	3.74578
162-982A-17H-3-W 24	153.94	172.79	172.94	5.56314	5.55504	5034	116	3.70191
162-982A-17H-3-W 26	153.96	172.81	172.96	5.56365	5.55572	5073	59	3.70526
162-982A-17H-3-W 29	153.99	172.84	172.99	5.56441	5.55674	4049	48	3.60735
162-982A-17H-3-W 30	154	172.85	173	5.56466	5.55708	3736	102	3.57241
162-982A-17H-3-W 32	154.02	172.87	173.02	5.56517	5.55776	3094	136	3.49052
162-982A-17H-3-W 35	154.05	172.9	173.05	5.56593	5.55878	3431	91	3.53542
162-982A-17H-3-W 36	154.06	172.91	173.06	5.56619	5.55912	2724	47	3.43521
162-982A-17H-3-W 38	154.08	172.93	173.08	5.56669	5.5598	2355	57	3.37199
162-982A-17H-3-W 40	154.1	172.95	173.1	5.5672	5.56048	2444	67	3.3881
162-982A-17H-3-W 43	154.13	172.98	173.13	5.56796	5.5615	2581	108	3.41179
162-982A-17H-3-W 44	154.14	172.99	173.14	5.56822	5.56184	2526	34	3.40243
162-982A-17H-3-W 46	154.16	173.01	173.16	5.56873	5.56252	2575	82	3.41078
162-982A-17H-3-W 48	154.18	173.03	173.18	5.56923	5.5632	2791	100	3.44576
162-982A-17H-3-W 49	154.19	173.04	173.19	5.56949	5.56354	2508	109	3.39933
162-982A-17H-3-W 52	154.22	173.07	173.22	5.57025	5.56456	2746	117	3.4387
162-982A-17H-3-W 54	154.24	173.09	173.24	5.57076	5.56524	2573	97	3.41044
162-982A-17H-3-W 57	154.27	173.12	173.27	5.57152	5.56626	2470	38	3.3927
162-982A-17H-3-W 58	154.28	173.13	173.28	5.57177	5.5666	2464	31	3.39164
162-982A-17H-3-W 61	154.31	173.16	173.31	5.57253	5.56762	2469	59	3.39252
162-982A-17H-3-W 62	154.32	173.17	173.32	5.57279	5.56796	2441	87	3.38757
162-982A-17H-3-W 65	154.35	173.2	173.35	5.57355	5.56898	2597	85	3.41447
162-982A-17H-3-W 66	154.36	173.21	173.36	5.5738	5.56932	2590	76	3.4133
162-982A-17H-3-W 68	154.38	173.23	173.38	5.57431	5.57	2630	100	3.41996
162-982A-17H-3-W 70	154.4	173.25	173.4	5.57482	5.57068	3080	56	3.48855
162-982A-17H-3-W 72	154.42	173.27	173.42	5.57532	5.57136	2527	54	3.40261
162-982A-17H-3-W 74	154.44	173.29	173.44	5.57583	5.57204	2603	59	3.41547
162-982A-17H-3-W 76	154.46	173.31	173.46	5.57634	5.57272	2377	37	3.37603
162-982A-17H-3-W 78	154.48	173.33	173.48	5.57685	5.5734	2787	80	3.44514
162-982A-17H-3-W 81	154.51	173.36	173.51	5.57761	5.57442	2771	40	3.44264
162-982A-17H-3-W 82	154.52	173.37	173.52	5.57786	5.57476	2509	7	3.3995
162-982A-17H-3-W 84	154.54	173.39	173.54	5.57837	5.57544	2553	53	3.40705
162-982A-17H-3-W 86	154.56	173.41	173.56	5.57888	5.57612	2717	89	3.43409
162-982A-17H-3-W 89	154.59	173.44	173.59	5.57964	5.57714	3234	61	3.50974
162-982A-17H-3-W 90	154.6	173.45	173.6	5.57989	5.57748	3277	96	3.51548
162-982A-17H-3-W 92	154.62	173.47	173.62	5.5804	5.57816	3266	58	3.51402
162-982A-17H-3-W 93	154.63	173.48	173.63	5.58065	5.5785	3416	112	3.53352
162-982A-17H-3-W 94	154.64	173.49	173.64	5.58091	5.57884	3651	119	3.56241
162-982A-17H-3-W 97	154.67	173.52	173.67	5.58167	5.57986	5072	115	3.70518
162-982A-17H-3-W 98	154.68	173.53	173.68	5.58192	5.5802	4520	138	3.65514
162-982A-17H-3-W 99	154.69	173.54	173.69	5.58218	5.58054	4382	108	3.64167
162-982A-17H-3-W 102	154.72	173.57	173.72	5.58294	5.58156	4696	121	3.67173
162-982A-17H-3-W 104	154.74	173.59	173.74	5.58345	5.58224	5073	182	3.70526
162-982A-17H-3-W 107	154.77	173.62	173.77	5.58421	5.58326	4772	99	3.6787
162-982A-17H-3-W 108	154.78	173.63	173.78	5.58446	5.5836	4512	112	3.65437
162-982A-17H-3-W 110	154.8	173.65	173.8	5.58497	5.58428	5025	152	3.70114
162-982A-17H-3-W 111	154.81	173.66	173.81	5.58522	5.58462	4459	104	3.64924
162-982A-17H-3-W 113.5	154.84	173.69	173.84	5.58598	5.58564	4477	108	3.65099
162-982A-17H-3-W 117	154.87	173.72	173.87	5.58675	5.58666	4948	68	3.69443
162-982A-17H-3-W 118	154.88	173.73	173.88	5.587	5.587	5015	73	3.70027
162-982A-17H-3-W 121	154.91	173.76	173.91	5.58754	5.58755	4555	84	3.65849
162-982A-17H-3-W 122	154.92	173.77	173.92	5.58772	5.58773	4257	103	3.6291
162-982A-17H-3-W 123	154.93	173.78	173.93	5.5879	5.58792	4071	52	3.6097
162-982A-17H-3-W 126	154.96	173.81	173.96	5.58844	5.58847	3941	85	3.59561
162-982A-17H-3-W 128	154.98	173.83	173.98	5.5888	5.58883	3967	63	3.59846
162-982A-17H-3-W 131	155.01	173.86	174.01	5.58935	5.58938	3804	62	3.58024
162-982A-17H-3-W 132	155.02	173.87	174.02	5.58953	5.58957	3560	103	3.55145
162-982A-17H-3-W 135	155.05	173.9	174.05	5.59007	5.59012	3999	59	3.60195
162-982A-17H-3-W 136	155.06	173.91	174.06	5.59025	5.5903	3987	89	3.60065
162-982A-17H-3-W 139	155.09	173.94	174.09	5.59079	5.59085	3936	93	3.59506
162-982A-17H-3-W 140	155.1	173.95	174.1	5.59097	5.59103	3927	85	3.59406
162-982A-17H-3-W 141	155.11	173.96	174.11	5.59115	5.59122	3755	58	3.57461
162-982A-17H-3-W 144	155.14	173.99	174.14	5.59169	5.59177	3558	36	3.55121
162-982A-17H-3-W 145	155.15	174	174.15	5.59187	5.59195	3236	91	3.51001
162-982A-17H-3-W 146	155.16	174.01	174.16	5.59205	5.59213	2908	127	3.46359
162-982A-17H-3-W 148	155.18	174.03	174.18	5.59241	5.5925	2681	61	3.4283
162-982A-17H-3-W 149	155.19	174.04	174.19	5.59259	5.59268	2427	70	3.38507
162-982A-17H-4-W 3	155.23	174.08	174.23	5.59332	5.59342	2883	37	3.45984
162-982A-17H-4-W 4	155.24	174.09	174.24	5.5935	5.5936	2512	75	3.40002
162-982A-17H-4-W 5	155.25	174.1	174.25	5.59368	5.59378	2495	42	3.39707
162-982A-17H-4-W 8	155.28	174.13	174.28	5.59422	5.59433	2359	69	3.37273
162-982A-17H-4-W 11	155.31	174.16	174.31	5.59476	5.59488	2177	110	3.33786
162-982A-17H-4-W 13	155.33	174.18	174.33	5.59512	5.59525	2251	15	3.35238
162-982A-17H-4-W 14	155.34	174.19	174.34	5.5953	5.59543	2062	12	3.31429
162-982A-17H-4-W 17	155.37	174.22	174.37	5.59584	5.59598	2050	50	3.31175
162-982A-17H-4-W 18	155.38	174.23	174.38	5.59602	5.59617	1947	110	3.28937
162-982A-17H-4-W 19	155.39	174.24	174.39	5.5962	5.59635	1944	27	3.2887
162-982A-17H-4-W 22	155.42	174.27	174.42	5.59674	5.5969	1969	58	3.29425
162-982A-17H-4-W 24	155.44	174.29	174.44	5.59711	5.59727	1688	101	3.22737
162-982A-17H-4-W 26	155.46	174.31	174.46	5.59747	5.59763	1795	71	3.25406
162-982A-17H-4-W 29	155.49	174.34	174.49	5.59801	5.59818	2070	77	3.31597
162-982A-17H-4-W 30	155.5	174.35	174.5	5.59819	5.59837	2035	34	3.30856
162-982A-17H-4-W 32	155.52	174.37	174.52	5.59855	5.59873	2020	84	3.30535
162-982A-17H-4-W 34	155.54	174.39	174.54	5.59891	5.5991	1761	36	3.24576
162-982A-17H-4-W 37	155.57	174.42	174.57	5.59945	5.59965	1776	63	3.24944
162-982A-17H-4-W 38	155.58	174.43	174.58	5.59963	5.59983	1872	63	3.27231
162-982A-17H-4-W 39	155.59	174.44	174.59	5.59981	5.60002	1951	78	3.29026
162-982A-17H-4-W 42	155.62	174.47	174.62	5.60035	5.60057	1898	61	3.2783
162-982A-17H-4-W 44	155.64	174.49	174.64	5.60071	5.60093	1975	75	3.29557
162-982A-17H-4-W 45	155.65	174.5	174.65	5.60089	5.60112	1942	94	3.28825
162-982A-17H-4-W 48	155.68	174.53	174.68	5.60144	5.60167	1897	147	3.27807
162-982A-17H-4-W 51	155.71	174.56	174.71	5.60198	5.60222	1683	52	3.22608
162-982A-17H-4-W 52	155.72	174.57	174.72	5.60216	5.6024	1786	78	3.25188
162-982A-17H-4-W 55	155.75	174.6	174.75	5.6027	5.60295	1670	136	3.22272
162-982A-17H-4-W 56	155.76	174.61	174.76	5.60288	5.60313	1802	16	3.25575
162-982A-17H-4-W 58	155.78	174.63	174.78	5.60324	5.6035	1654	74	3.21854
162-982A-17H-4-W 59	155.79	174.64	174.79	5.60342	5.60368	1736	122	3.23955
162-982A-17H-4-W 61	155.81	174.66	174.81	5.60378	5.60405	1821	69	3.26031
162-982A-17H-4-W 64	155.84	174.69	174.84	5.60432	5.6046	1644	73	3.2159
162-982A-17H-4-W 67	155.87	174.72	174.87	5.60486	5.60515	1786	70	3.25188
162-982A-17H-4-W 68	155.88	174.73	174.88	5.60505	5.60533	1817	72	3.25935
162-982A-17H-4-W 71	155.91	174.76	174.91	5.60559	5.60588	1918	105	3.28285
162-982A-17H-4-W 72	155.92	174.77	174.92	5.60577	5.60607	1673	93	3.2235
162-982A-17H-4-W 74	155.94	174.79	174.94	5.60613	5.60643	1696	78	3.22943
162-982A-17H-4-W 76	155.96	174.81	174.96	5.60649	5.6068	1778	83	3.24993
162-982A-17H-4-W 79	155.99	174.84	174.99	5.60703	5.60735	1865	115	3.27068
162-982A-17H-4-W 80	156	174.85	175	5.60721	5.60753	1755	66	3.24428
162-982A-17H-4-W 82	156.02	174.87	175.02	5.60757	5.6079	1586	42	3.2003
162-982A-17H-4-W 84.5	156.05	174.9	175.05	5.60811	5.60845	1623	89	3.21032
162-982A-17H-4-W 87	156.07	174.92	175.07	5.60847	5.60882	1728	82	3.23754
162-982A-17H-4-W 88	156.08	174.93	175.08	5.60865	5.609	1761	50	3.24576
162-982A-17H-4-W 90	156.1	174.95	175.1	5.60902	5.60937	1636	34	3.21378
162-982A-17H-4-W 91	156.11	174.96	175.11	5.6092	5.60955	1584	34	3.19976
162-982A-17H-4-W 92	156.12	174.97	175.12	5.60938	5.60973	1724	91	3.23654
162-982A-17H-4-W 94	156.14	174.99	175.14	5.60974	5.6101	1712	62	3.2335
162-982A-17H-4-W 96	156.16	175.01	175.16	5.6101	5.61047	1635	70	3.21352
162-982A-17H-4-W 99	156.19	175.04	175.19	5.61064	5.61102	1586	64	3.2003
162-982A-17H-4-W 100	156.2	175.05	175.2	5.61082	5.6112	1618	0	3.20898
162-982A-17H-4-W 102	156.22	175.07	175.22	5.61118	5.61157	1564	88	3.19424
162-982A-17H-4-W 103	156.23	175.08	175.23	5.61136	5.61175	1839	69	3.26458
162-982A-17H-4-W 104	156.24	175.09	175.24	5.61154	5.61193	1727	57	3.23729
162-982A-17H-4-W 106	156.26	175.11	175.26	5.6119	5.6123	1915	80	3.28217
162-982A-17H-4-W 108	156.28	175.13	175.28	5.61226	5.61267	1951	85	3.29026
162-982A-17H-4-W 109	156.29	175.14	175.29	5.61244	5.61285	1717	11	3.23477
162-982A-17H-4-W 112	156.32	175.17	175.32	5.61298	5.6134	1925	46	3.28443
162-982A-17H-4-W 114	156.34	175.19	175.34	5.61335	5.61377	1802	60	3.25575
162-982A-17H-4-W 116	156.36	175.21	175.36	5.61371	5.61413	1490	106	3.17319
162-982A-17H-4-W 118	156.38	175.23	175.38	5.61407	5.6145	1790	48	3.25285
162-982A-17H-4-W 119	156.39	175.24	175.39	5.61425	5.61468	1822	46	3.26055
162-982A-17H-4-W 122	156.42	175.27	175.42	5.61479	5.61523	1781	54	3.25066
162-982A-17H-4-W 124	156.44	175.29	175.44	5.61515	5.6156	2226	103	3.34753
162-982A-17H-4-W 127	156.47	175.32	175.47	5.61569	5.61615	1868	-1	3.27138
162-982A-17H-4-W 128	156.48	175.33	175.48	5.61587	5.61633	2016	38	3.30449
162-982A-17H-4-W 130	156.5	175.35	175.5	5.61623	5.6167	2016	59	3.30449
162-982A-17H-4-W 131	156.51	175.36	175.51	5.61641	5.61688	2047	17	3.31112
162-982A-17H-4-W 132	156.52	175.37	175.52	5.61659	5.61707	2148	51	3.33203
162-982A-17H-4-W 133	156.53	175.38	175.53	5.61677	5.61725	2108	111	3.32387
162-982A-17H-4-W 136	156.56	175.41	175.56	5.61732	5.6178	2127	95	3.32777
162-982A-17H-4-W 137	156.57	175.42	175.57	5.6175	5.61798	2425	80	3.38471
162-982A-17H-4-W 138	156.58	175.43	175.58	5.61768	5.61817	2108	63	3.32387
162-982A-17H-4-W 139	156.59	175.44	175.59	5.61786	5.61835	2378	87	3.37621
162-982A-17H-4-W 142	156.62	175.47	175.62	5.6184	5.6189	2506	30	3.39898
162-982A-17H-4-W 144	156.64	175.49	175.64	5.61876	5.61927	2533	60	3.40364
162-982A-17H-4-W 146	156.66	175.51	175.66	5.61912	5.61963	2290	70	3.35984
162-982A-17H-4-W 148	156.68	175.53	175.68	5.61948	5.62	2428	77	3.38525
162-982A-17H-4-W 149	156.69	175.54	175.69	5.61966	5.62018	2844	81	3.45393
162-982A-17H-5-W 2	156.72	175.57	175.72	5.6202	5.62073	2639	54	3.42144
162-982A-17H-5-W 2	156.72	175.57	175.72	5.6202	5.62073	2639	54	3.42144
162-982A-17H-5-W 5	156.75	175.6	175.75	5.62074	5.62128	2783	105	3.44451
162-982A-17H-5-W 5	156.75	175.6	175.75	5.62074	5.62128	2783	105	3.44451
162-982A-17H-5-W 6	156.76	175.61	175.76	5.62092	5.62147	2851	109	3.455
162-982A-17H-5-W 6	156.76	175.61	175.76	5.62092	5.62147	2851	109	3.455
162-982A-17H-5-W 8	156.78	175.63	175.78	5.62129	5.62183	2724	61	3.43521
162-982A-17H-5-W 10	156.8	175.65	175.8	5.62165	5.6222	2615	105	3.41747
162-982A-17H-5-W 12	156.82	175.67	175.82	5.62201	5.62257	2487	99	3.39568
162-982A-17H-5-W 15	156.85	175.7	175.85	5.62255	5.62312	2515	81	3.40054
162-982A-17H-5-W 17	156.87	175.72	175.87	5.62291	5.62348	2376	21	3.37585
162-982A-17H-5-W 18	156.88	175.73	175.88	5.62309	5.62367	2198	24	3.34203
162-982A-17H-5-W 20	156.9	175.75	175.9	5.62345	5.62403	1725	75	3.23679
162-982A-17H-5-W 22	156.92	175.77	175.92	5.62381	5.6244	1822	55	3.26055
162-982A-17H-5-W 25	156.95	175.8	175.95	5.62435	5.62495	1749	35	3.24279
162-982A-17H-5-W 26	156.96	175.81	175.96	5.62453	5.62513	1681	65	3.22557
162-982A-17H-5-W 29	156.99	175.84	175.99	5.62508	5.62568	1515	30	3.18041
162-982A-17H-5-W 30	157	175.85	176	5.62526	5.62587	1793	26	3.25358
162-982A-17H-5-W 31	157.01	175.86	176.01	5.62544	5.62605	1570	75	3.1959
162-982A-17H-5-W 34	157.04	175.89	176.04	5.62598	5.6266	1400	80	3.14613
162-982A-17H-5-W 37	157.07	175.92	176.07	5.62652	5.62715	1532	33	3.18526
162-982A-17H-5-W 39	157.09	175.94	176.09	5.62688	5.62752	1488	39	3.1726
162-982A-17H-5-W 40	157.1	175.95	176.1	5.62706	5.6277	1595	50	3.20276
162-982A-17H-5-W 42	157.12	175.97	176.12	5.62742	5.62807	1379	92	3.13956
162-982A-17H-5-W 44	157.14	175.99	176.14	5.62778	5.62843	1567	43	3.19507
162-982A-17H-5-W 45	157.15	176	176.15	5.62796	5.62862	1332	46	3.1245
162-982A-17H-5-W 48	157.18	176.03	176.18	5.6285	5.62917	1634	55	3.21325
162-982A-17H-5-W 50	157.2	176.05	176.2	5.62886	5.62953	1596	40	3.20303
162-982A-17H-5-W 53	157.23	176.08	176.23	5.62941	5.63008	1708	50	3.23249
162-982A-17H-5-W 54	157.24	176.09	176.24	5.62959	5.63027	1488	98	3.1726
162-982A-17H-5-W 56	157.26	176.11	176.26	5.62995	5.63063	1794	72	3.25382
162-982A-17H-5-W 58	157.28	176.13	176.28	5.63031	5.631	1478	60	3.16967
162-982A-17H-5-W 60	157.3	176.15	176.3	5.63067	5.63137	1638	125	3.21431
162-982A-17H-5-W 62	157.32	176.17	176.32	5.63103	5.63173	1505	52	3.17754
162-982A-17H-5-W 64	157.34	176.19	176.34	5.63139	5.6321	1714	66	3.23401
162-982A-17H-5-W 67	157.37	176.22	176.37	5.63193	5.63265	1818	81	3.25959
162-982A-17H-5-W 68	157.38	176.23	176.38	5.63211	5.63283	1873	58	3.27254
162-982A-17H-5-W 70	157.4	176.25	176.4	5.63247	5.6332	1940	29	3.2878
162-982A-17H-5-W 72	157.42	176.27	176.42	5.63283	5.63357	1840	80	3.26482
162-982A-17H-5-W 73	157.43	176.28	176.43	5.63302	5.63375	1918	57	3.28285
162-982A-17H-5-W 76	157.46	176.31	176.46	5.63356	5.6343	1800	27	3.25527
162-982A-17H-5-W 79	157.49	176.34	176.49	5.6341	5.63485	1973	93	3.29513
162-982A-17H-5-W 80	157.5	176.35	176.5	5.63428	5.63503	1964	100	3.29314
162-982A-17H-5-W 81	157.51	176.36	176.51	5.63446	5.63522	2037	49	3.30899
162-982A-17H-5-W 84	157.54	176.39	176.54	5.635	5.63577	1847	83	3.26647
162-982A-17H-5-W 85	157.55	176.4	176.55	5.63518	5.63595	1844	36	3.26576
162-982A-17H-5-W 88	157.58	176.43	176.58	5.63572	5.6365	1931	82	3.28578
162-982A-17H-5-W 89	157.59	176.44	176.59	5.6359	5.63668	1994	39	3.29973
162-982A-17H-5-W 92	157.62	176.47	176.62	5.63644	5.63723	1965	62	3.29336
162-982A-17H-5-W 93	157.63	176.48	176.63	5.63662	5.63742	2096	57	3.32139
162-982A-17H-5-W 96	157.66	176.51	176.66	5.63717	5.63797	2111	42	3.32449
162-982A-17H-5-W 97	157.67	176.52	176.67	5.63735	5.63815	2031	49	3.30771
162-982A-17H-5-W 100	157.7	176.55	176.7	5.63789	5.6387	2370	89	3.37475
162-982A-17H-5-W 103	157.73	176.58	176.73	5.63843	5.63925	2404	20	3.38093
162-982A-17H-5-W 104	157.74	176.59	176.74	5.63861	5.63943	2043	50	3.31027
162-982A-17H-5-W 106	157.76	176.61	176.76	5.63897	5.6398	2385	56	3.37749
162-982A-17H-5-W 107	157.77	176.62	176.77	5.63915	5.63998	2242	91	3.35064
162-982A-17H-5-W 109.5	157.8	176.65	176.8	5.63969	5.64053	2348	56	3.3707
162-982A-17H-5-W 112.5	157.83	176.68	176.83	5.64023	5.64108	2677	54	3.42765
162-982A-17H-5-W 114	157.84	176.69	176.84	5.64041	5.64127	2668	105	3.42619
162-982A-17H-5-W 116	157.86	176.71	176.86	5.64077	5.64163	2869	150	3.45773
162-982A-17H-5-W 117	157.87	176.72	176.87	5.64095	5.64182	2902	44	3.4627
162-982A-17H-5-W 120	157.9	176.75	176.9	5.6415	5.64237	2841	68	3.45347
162-982A-17H-5-W 122	157.92	176.77	176.92	5.64186	5.64273	2945	15	3.46909
162-982A-17H-5-W 124	157.94	176.79	176.94	5.64222	5.6431	2878	86	3.45909
162-982A-17H-5-W 125	157.95	176.8	176.95	5.6424	5.64328	2805	33	3.44793
162-982A-17H-5-W 128	157.98	176.83	176.98	5.64294	5.64383	2455	102	3.39005
162-982A-17H-5-W 130	158	176.85	177	5.6433	5.6442	2674	48	3.42716
162-982A-17H-5-W 132	158.02	176.87	177.02	5.64366	5.64457	2564	70	3.40892
162-982A-17H-5-W 135	158.05	176.9	177.05	5.6442	5.64512	2472	60	3.39305
162-982A-17H-5-W 136	158.06	176.91	177.06	5.64438	5.6453	2355	108	3.37199
162-982A-17H-5-W 139	158.09	176.94	177.09	5.64492	5.64585	2498	42	3.39759
162-982A-17H-5-W 140	158.1	176.95	177.1	5.64511	5.64603	2280	111	3.35793
162-982A-17H-5-W 141	158.11	176.96	177.11	5.64529	5.64622	2380	54	3.37658
162-982A-17H-5-W 144	158.14	176.99	177.14	5.64583	5.64677	2424	97	3.38453
162-982A-17H-5-W 146	158.16	177.01	177.16	5.64619	5.64713	1780	122	3.25042
162-982A-17H-5-W 148	158.18	177.03	177.18	5.64655	5.6475	1788	25	3.25237
162-982A-17H-6-W 2	158.22	177.07	177.22	5.64727	5.64823	1517	38	3.18099
162-982A-17H-6-W 4	158.24	177.09	177.24	5.64763	5.6486	1804	82	3.25624
162-982A-17H-6-W 5	158.25	177.1	177.25	5.64781	5.64878	1778	66	3.24993
162-982A-17H-6-W 7	158.27	177.12	177.27	5.64817	5.64915	1665	47	3.22141
162-982A-17H-6-W 10	158.3	177.15	177.3	5.64871	5.6497	1670	76	3.22272
162-982A-17H-6-W 12	158.32	177.17	177.32	5.64908	5.65007	1758	126	3.24502
162-982A-17H-6-W 14	158.34	177.19	177.34	5.64944	5.65043	1673	38	3.2235
162-982A-17H-6-W 16	158.36	177.21	177.36	5.6498	5.6508	1810	94	3.25768
162-982A-17H-6-W 19	158.39	177.24	177.39	5.65034	5.65135	1795	79	3.25406
162-982A-17H-6-W 22	158.42	177.27	177.42	5.65088	5.6519	1772	64	3.24846
162-982A-17H-6-W 24	158.44	177.29	177.44	5.65124	5.65227	1879	70	3.27393
162-982A-17H-6-W 26	158.46	177.31	177.46	5.6516	5.65263	2089	95	3.31994
162-982A-17H-6-W 28	158.48	177.33	177.48	5.65196	5.653	2182	95	3.33885
162-982A-17H-6-W 30	158.5	177.35	177.5	5.65232	5.65339	2082	107	3.31848
162-982A-17H-6-W 32	158.52	177.37	177.52	5.65268	5.65379	1919	76	3.28307
162-982A-17H-6-W 34	158.54	177.39	177.54	5.65305	5.65418	1980	48	3.29667
162-982A-17H-6-W 36	158.56	177.41	177.56	5.65341	5.65457	1951	33	3.29026
162-982A-17H-6-W 37	158.57	177.42	177.57	5.65359	5.65477	2351	96	3.37125
162-982A-17H-6-W 40	158.6	177.45	177.6	5.65413	5.65536	2228	30	3.34792
162-982A-17H-6-W 42	158.62	177.47	177.62	5.65449	5.65576	1980	51	3.29667
162-982A-17H-6-W 44	158.64	177.49	177.64	5.65485	5.65615	3080	78	3.48855
162-982A-17H-6-W 46	158.66	177.51	177.66	5.65521	5.65654	1931	70	3.28578
162-982A-17H-6-W 47	158.67	177.52	177.67	5.65539	5.65674	2057	94	3.31323
162-982A-17H-6-W 50	158.7	177.55	177.7	5.65593	5.65733	1923	87	3.28398
162-982A-17H-6-W 51	158.71	177.56	177.71	5.65611	5.65753	1649	31	3.21722
162-982A-17H-6-W 54	158.74	177.59	177.74	5.65665	5.65812	1678	60	3.22479
162-982A-17H-6-W 56	158.76	177.61	177.76	5.65702	5.65851	1653	32	3.21827
162-982A-17H-6-W 58	158.78	177.63	177.78	5.65738	5.6589	1658	107	3.21958
162-982A-17H-6-W 59	158.79	177.64	177.79	5.65756	5.6591	1794	50	3.25382
162-982A-17H-6-W 62	158.82	177.67	177.82	5.6581	5.65969	1995	81	3.29994
162-982A-17H-6-W 63	158.83	177.68	177.83	5.65828	5.65989	1972	101	3.29491
162-982A-17H-6-W 65	158.85	177.7	177.85	5.65864	5.66028	2249	53	3.35199
162-982A-17H-6-W 68	158.88	177.73	177.88	5.65918	5.66087	1801	46	3.25551
162-982A-17H-6-W 69	158.89	177.74	177.89	5.65936	5.66107	2306	25	3.36286
162-982A-17H-6-W 72	158.92	177.77	177.92	5.6599	5.66166	1544	100	3.18865
162-982A-17H-6-W 75	158.95	177.8	177.95	5.66044	5.66225	1870	58	3.27184
162-982A-17H-6-W 76	158.96	177.81	177.96	5.66062	5.66245	1858	90	3.26905
162-982A-17H-6-W 77	158.97	177.82	177.97	5.6608	5.66264	1878	35	3.2737
162-982A-17H-6-W 81	159.01	177.86	178.01	5.66153	5.66343	1916	74	3.2824
162-982A-17H-6-W 83	159.03	177.88	178.03	5.66189	5.66382	1744	56	3.24155
162-982A-17H-6-W 84	159.04	177.89	178.04	5.66207	5.66402	1913	88	3.28171
162-982A-17H-6-W 85	159.05	177.9	178.05	5.66225	5.66422	2176	63	3.33766
162-982A-17H-6-W 88	159.08	177.93	178.08	5.66279	5.66481	2387	81	3.37785
162-982A-17H-6-W 90	159.1	177.95	178.1	5.66315	5.6652	2396	23	3.37949
162-982A-17H-6-W 91	159.11	177.96	178.11	5.66333	5.6654	2242	91	3.35064
162-982A-17H-6-W 94	159.14	177.99	178.14	5.66387	5.66599	2150	119	3.33244
162-982A-17H-6-W 96	159.16	178.01	178.16	5.66423	5.66638	2324	38	3.36624
162-982A-17H-6-W 98	159.18	178.03	178.18	5.66459	5.66678	2274	53	3.35679
162-982A-17H-6-W 99	159.19	178.04	178.19	5.66477	5.66697	2253	106	3.35276
162-982A-17H-6-W 102	159.22	178.07	178.22	5.66532	5.66756	2202	13	3.34282
162-982A-17H-6-W 104	159.24	178.09	178.24	5.66568	5.66796	2275	62	3.35698
162-982A-17H-6-W 105	159.25	178.1	178.25	5.66586	5.66815	2481	85	3.39463
162-982A-17H-6-W 108	159.28	178.13	178.28	5.6664	5.66874	2037	53	3.30899
162-982A-17H-6-W 110	159.3	178.15	178.3	5.66676	5.66914	2162	70	3.33486
162-982A-17H-6-W 112	159.32	178.17	178.32	5.66712	5.66953	2023	57	3.306
162-982A-17H-6-W 115	159.35	178.2	178.35	5.66766	5.67012	1917	121	3.28262
162-982A-17H-6-W 117	159.37	178.22	178.37	5.66802	5.67052	2128	53	3.32797
162-982A-17H-6-W 118	159.38	178.23	178.38	5.6682	5.67071	2077	76	3.31744
162-982A-17H-6-W 120	159.4	178.25	178.4	5.66856	5.67111	1915	117	3.28217
162-982A-17H-6-W 123	159.43	178.28	178.43	5.66911	5.6717	1633	121	3.21299
162-982A-17H-6-W 124	159.44	178.29	178.44	5.66929	5.67189	1903	108	3.27944
162-982A-17H-6-W 125	159.45	178.3	178.45	5.66947	5.67209	1812	64	3.25816
162-982A-17H-6-W 128	159.48	178.33	178.48	5.67001	5.67268	1675	101	3.22401
162-982A-17H-6-W 129	159.49	178.34	178.49	5.67019	5.67288	1773	39	3.24871
162-982A-17H-6-W 132	159.52	178.37	178.52	5.67073	5.67347	1518	51	3.18127
162-982A-17H-6-W 134	159.54	178.39	178.54	5.67109	5.67386	1632	57	3.21272
162-982A-17H-6-W 135	159.55	178.4	178.55	5.67127	5.67406	1565	91	3.19451
162-982A-17H-6-W 138	159.58	178.43	178.58	5.67181	5.67465	1633	66	3.21299
162-982A-17H-6-W 140	159.6	178.45	178.6	5.67217	5.67504	1398	58	3.14551
162-982A-17H-6-W 141	159.61	178.46	178.61	5.67235	5.67524	1343	57	3.12808
162-982A-17H-6-W 144	159.64	178.49	178.64	5.67289	5.67583	1437	47	3.15746
162-982A-17H-6-W 147	159.67	178.52	178.67	5.67344	5.67642	1272	45	3.10449
162-982A-17H-6-W 148	159.68	178.53	178.68	5.67362	5.67662	1394	2	3.14426
162-982A-18H-2-W 2	161.72	181.07	181.22	5.71945	5.7205	1442	58	3.15897
162-982A-18H-2-W 4	161.74	181.09	181.24	5.71981	5.72083	1403	57	3.14706
162-982A-18H-2-W 6	161.76	181.11	181.26	5.72017	5.72116	1469	120	3.16702
162-982A-18H-2-W 8	161.78	181.13	181.28	5.72053	5.72149	1559	55	3.19285
162-982A-18H-2-W 10	161.8	181.15	181.3	5.72089	5.72182	1539	9	3.18724
162-982A-18H-2-W 12	161.82	181.17	181.32	5.72126	5.72214	1474	29	3.1685
162-982A-18H-2-W 14	161.84	181.19	181.34	5.72162	5.72247	1630	79	3.21219
162-982A-18H-2-W 15	161.85	181.2	181.35	5.7218	5.72264	1612	87	3.20737
162-982A-18H-2-W 18	161.88	181.23	181.38	5.72234	5.72313	1578	73	3.19811
162-982A-18H-2-W 20	161.9	181.25	181.4	5.7227	5.72346	1545	41	3.18893
162-982A-18H-2-W 22	161.92	181.27	181.42	5.72306	5.72378	1764	39	3.2465
162-982A-18H-2-W 23	161.93	181.28	181.43	5.72324	5.72395	1545	37	3.18893
162-982A-18H-2-W 26	161.96	181.31	181.46	5.72378	5.72444	1552	16	3.19089
162-982A-18H-2-W 28	161.98	181.33	181.48	5.72414	5.72477	1553	53	3.19117
162-982A-18H-2-W 30	162	181.35	181.5	5.7245	5.7251	1525	61	3.18327
162-982A-18H-2-W 32	162.02	181.37	181.52	5.72486	5.72542	1417	59	3.15137
162-982A-18H-2-W 35	162.05	181.4	181.55	5.72541	5.72592	1665	53	3.22141
162-982A-18H-2-W 36	162.06	181.41	181.56	5.72559	5.72608	1599	75	3.20385
162-982A-18H-2-W 38	162.08	181.43	181.58	5.72595	5.72641	1360	74	3.13354
162-982A-18H-2-W 40	162.1	181.45	181.6	5.72631	5.72674	1388	63	3.14239
162-982A-18H-2-W 41	162.11	181.46	181.61	5.72649	5.7269	1606	92	3.20575
162-982A-18H-2-W 44	162.14	181.49	181.64	5.72703	5.72739	1204	78	3.08063
162-982A-18H-2-W 46	162.16	181.51	181.66	5.72739	5.72772	1428	65	3.15473
162-982A-18H-2-W 48	162.18	181.53	181.68	5.72775	5.72805	1829	47	3.26221
162-982A-18H-2-W 50	162.2	181.55	181.7	5.72811	5.72838	1813	63	3.2584
162-982A-18H-2-W 51	162.21	181.56	181.71	5.72829	5.72854	1624	160	3.21059
162-982A-18H-2-W 54	162.24	181.59	181.74	5.72883	5.72903	1771	53	3.24822
162-982A-18H-2-W 56	162.26	181.61	181.76	5.7292	5.72936	1989	66	3.29863
162-982A-18H-2-W 58	162.28	181.63	181.78	5.72956	5.72969	1840	71	3.26482
162-982A-18H-2-W 60	162.3	181.65	181.8	5.72992	5.73002	1882	24	3.27462
162-982A-18H-2-W 61	162.31	181.66	181.81	5.7301	5.73018	2020	55	3.30535
162-982A-18H-2-W 64	162.34	181.69	181.84	5.73064	5.73067	2298	51	3.36135
162-982A-18H-2-W 66	162.36	181.71	181.86	5.731	5.731	1981	56	3.29688
162-982A-18H-2-W 68	162.38	181.73	181.88	5.73139	5.73134	2484	113	3.39515
162-982A-18H-2-W 71	162.41	181.76	181.91	5.73197	5.73184	2977	71	3.47378
162-982A-18H-2-W 72	162.42	181.77	181.92	5.73217	5.73201	2744	122	3.43838
162-982A-18H-2-W 73	162.43	181.78	181.93	5.73236	5.73218	3142	85	3.49721
162-982A-18H-2-W 76	162.46	181.81	181.96	5.73294	5.73269	3249	81	3.51175
162-982A-18H-2-W 78	162.48	181.83	181.98	5.73333	5.73303	4052	88	3.60767
162-982A-18H-2-W 80	162.5	181.85	182	5.73372	5.73336	5442	153	3.73576
162-982A-18H-2-W 83	162.53	181.88	182.03	5.7343	5.73387	1840	220	3.26482
162-982A-18H-2-W 84	162.54	181.89	182.04	5.7345	5.73404	1840	74	3.26482
162-982A-18H-2-W 86	162.56	181.91	182.06	5.73489	5.73438	1847	74	3.26647
162-982A-18H-2-W 89	162.59	181.94	182.09	5.73547	5.73488	1865	73	3.27068
162-982A-18H-2-W 90	162.6	181.95	182.1	5.73566	5.73505	1882	73	3.27462
162-982A-18H-2-W 92	162.62	181.97	182.12	5.73605	5.73539	1899	73	3.27852
162-982A-18H-2-W 95	162.65	182	182.15	5.73664	5.7359	3284	135	3.5164
162-982A-18H-2-W 96	162.66	182.01	182.16	5.73683	5.73607	4026	95	3.60487
162-982A-18H-2-W 98	162.68	182.03	182.18	5.73722	5.7364	2124	96	3.32715
162-982A-18H-2-W 100	162.7	182.05	182.2	5.73761	5.73674	2449	117	3.38899
162-982A-18H-2-W 101	162.71	182.06	182.21	5.7378	5.73691	1679	38	3.22505
162-982A-18H-2-W 104	162.74	182.09	182.24	5.73839	5.73742	1601	97	3.20439
162-982A-18H-2-W 106	162.76	182.11	182.26	5.73877	5.73775	1575	75	3.19728
162-982A-18H-2-W 108	162.78	182.13	182.28	5.73916	5.73809	1623	63	3.21032
162-982A-18H-2-W 110	162.8	182.15	182.3	5.73955	5.73843	1558	59	3.19257
162-982A-18H-2-W 111	162.81	182.16	182.31	5.73975	5.7386	1557	38	3.19229
162-982A-18H-2-W 114	162.84	182.19	182.34	5.74033	5.73911	1661	63	3.22037
162-982A-18H-2-W 116	162.86	182.21	182.36	5.74072	5.73944	1484	92	3.17143
162-982A-18H-2-W 118	162.88	182.23	182.38	5.74111	5.73978	1501	76	3.17638
162-982A-18H-2-W 121	162.91	182.26	182.41	5.74169	5.74029	1679	77	3.22505
162-982A-18H-2-W 122	162.92	182.27	182.42	5.74188	5.74046	1772	73	3.24846
162-982A-18H-2-W 124	162.94	182.29	182.44	5.74227	5.74079	1762	52	3.24601
162-982A-18H-2-W 126	162.96	182.31	182.46	5.74266	5.74113	1691	69	3.22814
162-982A-18H-2-W 127	162.97	182.32	182.47	5.74286	5.7413	1969	58	3.29425
162-982A-18H-2-W 130	163	182.35	182.5	5.74344	5.74181	1865	53	3.27068
162-982A-18H-2-W 132	163.02	182.37	182.52	5.74383	5.74215	1847	37	3.26647
162-982A-18H-2-W 135	163.05	182.4	182.55	5.74441	5.74265	1744	68	3.24155
162-982A-18H-2-W 136	163.06	182.41	182.56	5.7446	5.74282	1899	63	3.27852
162-982A-18H-2-W 138	163.08	182.43	182.58	5.74499	5.74316	2059	35	3.31366
162-982A-18H-2-W 141	163.11	182.46	182.61	5.74558	5.74367	2083	78	3.31869
162-982A-18H-2-W 142	163.12	182.47	182.62	5.74577	5.74383	2156	48	3.33365
162-982A-18H-2-W 144	163.14	182.49	182.64	5.74616	5.74417	2280	82	3.35793
162-982A-18H-2-W 146	163.16	182.51	182.66	5.74655	5.74451	2207	99	3.3438
162-982A-18H-2-W 148	163.18	182.53	182.68	5.74694	5.74485	2054	67	3.3126
162-982A-18H-3-W 2	163.22	182.57	182.72	5.74771	5.74552	2218	32	3.34596
162-982A-18H-3-W 4	163.24	182.59	182.74	5.7481	5.74586	2417	58	3.38328
162-982A-18H-3-W 6	163.26	182.61	182.76	5.74849	5.7462	2328	78	3.36698
162-982A-18H-3-W 7	163.27	182.62	182.77	5.74869	5.74637	2551	90	3.40671
162-982A-18H-3-W 10	163.3	182.65	182.8	5.74927	5.74687	2528	97	3.40278
162-982A-18H-3-W 12	163.32	182.67	182.82	5.74966	5.74721	2508	84	3.39933
162-982A-18H-3-W 13	163.33	182.68	182.83	5.74985	5.74738	2335	106	3.36829
162-982A-18H-3-W 16	163.36	182.71	182.86	5.75044	5.74789	2038	18	3.3092
162-982A-18H-3-W 17	163.37	182.72	182.87	5.75063	5.74806	2293	39	3.3604
162-982A-18H-3-W 20	163.4	182.75	182.9	5.75121	5.74856	2089	61	3.31994
162-982A-18H-3-W 23	163.43	182.78	182.93	5.7518	5.74907	2286	63	3.35908
162-982A-18H-3-W 24	163.44	182.79	182.94	5.75199	5.74924	2221	30	3.34655
162-982A-18H-3-W 26	163.46	182.81	182.96	5.75238	5.74958	2179	103	3.33826
162-982A-18H-3-W 28	163.48	182.83	182.98	5.75277	5.74991	2363	50	3.37346
162-982A-18H-3-W 31	163.51	182.86	183.01	5.75335	5.75042	2271	108	3.35622
162-982A-18H-3-W 32	163.52	182.87	183.02	5.75354	5.75059	2152	41	3.33284
162-982A-18H-3-W 35	163.55	182.9	183.05	5.75413	5.7511	2682	79	3.42846
162-982A-18H-3-W 36	163.56	182.91	183.06	5.75432	5.75126	2481	0	3.39463
162-982A-18H-3-W 38	163.58	182.93	183.08	5.75471	5.7516	2794	104	3.44623
162-982A-18H-3-W 40	163.6	182.95	183.1	5.7551	5.75194	2767	40	3.44201
162-982A-18H-3-W 43	163.63	182.98	183.13	5.75568	5.75245	2985	47	3.47494
162-982A-18H-3-W 44	163.64	182.99	183.14	5.75588	5.75262	2946	36	3.46923
162-982A-18H-3-W 46	163.66	183.01	183.16	5.75627	5.75295	2995	95	3.4764
162-982A-18H-3-W 48	163.68	183.03	183.18	5.75665	5.75329	3287	63	3.5168
162-982A-18H-3-W 50	163.7	183.05	183.2	5.75704	5.75363	2911	87	3.46404
162-982A-18H-3-W 53	163.73	183.08	183.23	5.75763	5.75414	2811	105	3.44886
162-982A-18H-3-W 54	163.74	183.09	183.24	5.75782	5.7543	2989	119	3.47553
162-982A-18H-3-W 56	163.76	183.11	183.26	5.75821	5.75464	2835	66	3.45255
162-982A-18H-3-W 58	163.78	183.13	183.28	5.7586	5.75498	2977	59	3.47378
162-982A-18H-3-W 60	163.8	183.15	183.3	5.75899	5.75532	3015	20	3.47929
162-982A-18H-3-W 63	163.83	183.18	183.33	5.75957	5.75582	3169	62	3.50092
162-982A-18H-3-W 64	163.84	183.19	183.34	5.75976	5.75599	3178	48	3.50215
162-982A-18H-3-W 65	163.85	183.2	183.35	5.75996	5.75616	3032	86	3.48173
162-982A-18H-3-W 68	163.88	183.23	183.38	5.76054	5.75667	3081	84	3.48869
162-982A-18H-3-W 70	163.9	183.25	183.4	5.76093	5.75701	2757	78	3.44044
162-982A-18H-3-W 72	163.92	183.27	183.42	5.76132	5.75734	3117	86	3.49374
162-982A-18H-3-W 74	163.94	183.29	183.44	5.76171	5.75768	2832	124	3.45209
162-982A-18H-3-W 76	163.96	183.31	183.46	5.7621	5.75802	2836	60	3.45271
162-982A-18H-3-W 78	163.98	183.33	183.48	5.76249	5.75836	2944	78	3.46894
162-982A-18H-3-W 79	163.99	183.34	183.49	5.76268	5.75853	2855	84	3.45561
162-982A-18H-3-W 81	164.01	183.36	183.51	5.76307	5.75886	3062	28	3.48601
162-982A-18H-3-W 84	164.04	183.39	183.54	5.76365	5.75937	2732	63	3.43648
162-982A-18H-3-W 86	164.06	183.41	183.56	5.76404	5.75971	2699	36	3.4312
162-982A-18H-3-W 88	164.08	183.43	183.58	5.76443	5.76005	3037	81	3.48244
162-982A-18H-3-W 90	164.1	183.45	183.6	5.76482	5.76038	3302	102	3.51878
162-982A-18H-3-W 91	164.11	183.46	183.61	5.76501	5.76055	3046	95	3.48373
162-982A-18H-3-W 94	164.14	183.49	183.64	5.76559	5.76106	2992	51	3.47596
162-982A-18H-3-W 97	164.17	183.52	183.67	5.76618	5.76157	2787	78	3.44514
162-982A-18H-3-W 98	164.18	183.53	183.68	5.76637	5.76174	2924	55	3.46598
162-982A-18H-3-W 101	164.21	183.56	183.71	5.76696	5.76224	2446	38	3.38846
162-982A-18H-3-W 102	164.22	183.57	183.72	5.76715	5.76241	2562	42	3.40858
162-982A-18H-3-W 103	164.23	183.58	183.73	5.76734	5.76258	2561	83	3.40841
162-982A-18H-3-W 106	164.26	183.61	183.76	5.76793	5.76309	2477	38	3.39393
162-982A-18H-3-W 109	164.29	183.64	183.79	5.76851	5.76359	2378	49	3.37621
162-982A-18H-3-W 110	164.3	183.65	183.8	5.7687	5.76376	2265	57	3.35507
162-982A-18H-3-W 113	164.33	183.68	183.83	5.76929	5.76427	2198	83	3.34203
162-982A-18H-3-W 114	164.34	183.69	183.84	5.76948	5.76444	2038	26	3.3092
162-982A-18H-3-W 116	164.36	183.71	183.86	5.76987	5.76477	1897	57	3.27807
162-982A-18H-3-W 117	164.37	183.72	183.87	5.77006	5.76494	1966	75	3.29358
162-982A-18H-3-W 120	164.4	183.75	183.9	5.77065	5.76545	2038	77	3.3092
162-982A-18H-3-W 122	164.42	183.77	183.92	5.77104	5.76579	1685	45	3.2266
162-982A-18H-3-W 124	164.44	183.79	183.94	5.77143	5.76613	2043	49	3.31027
162-982A-18H-3-W 126	164.46	183.81	183.96	5.77181	5.76646	1769	78	3.24773
162-982A-18H-3-W 128	164.48	183.83	183.98	5.7722	5.7668	1769	77	3.24773
162-982A-18H-3-W 130	164.5	183.85	184	5.77259	5.76714	1623	42	3.21032
162-982A-18H-3-W 132	164.52	183.87	184.02	5.77298	5.76748	1787	72	3.25212
162-982A-18H-3-W 134	164.54	183.89	184.04	5.77337	5.76781	1539	58	3.18724
162-982A-18H-3-W 136	164.56	183.91	184.06	5.77376	5.76815	1647	55	3.21669
162-982A-18H-3-W 137	164.57	183.92	184.07	5.77395	5.76832	1729	61	3.23779
162-982A-18H-3-W 140	164.6	183.95	184.1	5.77453	5.76883	1829	83	3.26221
162-982A-18H-3-W 141	164.61	183.96	184.11	5.77473	5.769	1760	38	3.24551
162-982A-18H-3-W 144	164.64	183.99	184.14	5.77531	5.7695	1558	139	3.19257
162-982A-18H-3-W 146	164.66	184.01	184.16	5.7757	5.76984	1448	33	3.16077
162-982A-18H-3-W 148	164.68	184.03	184.18	5.77609	5.77018	1714	62	3.23401
162-982A-18H-4-W 2	164.72	184.07	184.22	5.77687	5.77085	1605	27	3.20548
162-982A-18H-4-W 5	164.75	184.1	184.25	5.77745	5.77136	1416	48	3.15106
162-982A-18H-4-W 6	164.76	184.11	184.26	5.77764	5.77153	1596	82	3.20303
162-982A-18H-4-W 8	164.78	184.13	184.28	5.77803	5.77187	1475	40	3.16879
162-982A-18H-4-W 9	164.79	184.14	184.29	5.77823	5.77204	1517	69	3.18099
162-982A-18H-4-W 12	164.82	184.17	184.32	5.77881	5.77254	1583	53	3.19948
162-982A-18H-4-W 15	164.85	184.2	184.35	5.77939	5.77305	1545	29	3.18893
162-982A-18H-4-W 16	164.86	184.21	184.36	5.77959	5.77322	1506	65	3.17782
162-982A-18H-4-W 19	164.89	184.24	184.39	5.78017	5.77373	1321	66	3.1209
162-982A-18H-4-W 20	164.9	184.25	184.4	5.78037	5.77389	1297	27	3.11294
162-982A-18H-4-W 22	164.92	184.27	184.42	5.78075	5.77423	1671	49	3.22298
162-982A-18H-4-W 24	164.94	184.29	184.44	5.78114	5.77457	1452	37	3.16197
162-982A-18H-4-W 26	164.96	184.31	184.46	5.78153	5.77491	1430	29	3.15534
162-982A-18H-4-W 28	164.98	184.33	184.48	5.78192	5.77525	1441	63	3.15866
162-982A-18H-4-W 30	165	184.35	184.5	5.78231	5.77558	1425	53	3.15381
162-982A-18H-4-W 32	165.02	184.37	184.52	5.7827	5.77592	1389	67	3.1427
162-982A-18H-4-W 35	165.05	184.4	184.55	5.78328	5.77643	1433	74	3.15625
162-982A-18H-4-W 36	165.06	184.41	184.56	5.78348	5.7766	1547	28	3.18949
162-982A-18H-4-W 38	165.08	184.43	184.58	5.78386	5.77693	1540	54	3.18752
162-982A-18H-4-W 41	165.11	184.46	184.61	5.78445	5.77744	1104	62	3.04297
162-982A-18H-4-W 42	165.12	184.47	184.62	5.78464	5.77761	1936	65	3.28691
162-982A-18H-4-W 45	165.15	184.5	184.65	5.78522	5.77812	1413	115	3.15014
162-982A-18H-4-W 46	165.16	184.51	184.66	5.78542	5.77828	1466	53	3.16613
162-982A-18H-4-W 48	165.18	184.53	184.68	5.78581	5.77862	1390	60	3.14301
162-982A-18H-4-W 51	165.21	184.56	184.71	5.78639	5.77913	1438	21	3.15776
162-982A-18H-4-W 52	165.22	184.57	184.72	5.78658	5.7793	1305	53	3.11561
162-982A-18H-4-W 54	165.24	184.59	184.74	5.78697	5.77964	1609	49	3.20656
162-982A-18H-4-W 55	165.25	184.6	184.75	5.78717	5.7798	1463	14	3.16524
162-982A-18H-4-W 56	165.26	184.61	184.76	5.78736	5.77997	1464	51	3.16554
162-982A-18H-4-W 58	165.28	184.63	184.78	5.78775	5.78031	1369	67	3.1364
162-982A-18H-4-W 60	165.3	184.65	184.8	5.78814	5.78065	1834	80	3.2634
162-982A-18H-4-W 61	165.31	184.66	184.81	5.78833	5.78082	1610	42	3.20683
162-982A-18H-4-W 64	165.34	184.69	184.84	5.78892	5.78132	1688	49	3.22737
162-982A-18H-4-W 65	165.35	184.7	184.85	5.78911	5.78149	1710	84	3.233
162-982A-18H-4-W 68	165.38	184.73	184.88	5.78969	5.782	1799	86	3.25503
162-982A-18H-4-W 71	165.41	184.76	184.91	5.79028	5.78266	1713	86	3.23376
162-982A-18H-4-W 72	165.42	184.77	184.92	5.79047	5.78288	1642	114	3.21537
162-982A-18H-4-W 74	165.44	184.79	184.94	5.79086	5.78332	2075	49	3.31702
162-982A-18H-4-W 75	165.45	184.8	184.95	5.79105	5.78354	2019	85	3.30514
162-982A-18H-4-W 78	165.48	184.83	184.98	5.79164	5.7842	2102	117	3.32263
162-982A-18H-4-W 80	165.5	184.85	185	5.79203	5.78464	2108	94	3.32387
162-982A-18H-4-W 83	165.53	184.88	185.03	5.79261	5.7853	2048	75	3.31133
162-982A-18H-4-W 84	165.54	184.89	185.04	5.7928	5.78552	2332	74	3.36773
162-982A-18H-4-W 86	165.56	184.91	185.06	5.79319	5.78596	2655	92	3.42406
162-982A-18H-4-W 89	165.59	184.94	185.09	5.79378	5.78662	3099	103	3.49122
162-982A-18H-4-W 90	165.6	184.95	185.1	5.79397	5.78684	3495	96	3.54345
162-982A-18H-4-W 92	165.62	184.97	185.12	5.79436	5.78728	3063	56	3.48615
[truncated: 3,347 more rows]

## Sheet: Site 982 XRF data Hole B
IODP ID	mbsf	mcd (shipboard)	rmcd (this study)	AgeD17MT (this study)	AgeD17FT (this study)	Silica (counts)	Zirconium (counts)	ln(Silica) (counts)
162-982B-13H-2-W 3	111.53	123.07	123.07	4.55963	4.55963	1555	77	3.19173
162-982B-13H-2-W 4	111.54	123.08	123.08	4.55991	4.55991	1498	65	3.17551
162-982B-13H-2-W 6	111.56	123.1	123.1	4.56046	4.56046	1568	84	3.19535
162-982B-13H-2-W 8	111.58	123.12	123.12	4.56101	4.56101	1472	59	3.16791
162-982B-13H-2-W 10	111.6	123.14	123.14	4.56156	4.56156	1572	100	3.19645
162-982B-13H-2-W 12	111.62	123.16	123.16	4.56211	4.56211	1613	88	3.20763
162-982B-13H-2-W 13	111.63	123.17	123.17	4.56239	4.56239	1494	58	3.17435
162-982B-13H-2-W 16	111.66	123.2	123.2	4.56322	4.56322	1509	68	3.17869
162-982B-13H-2-W 17	111.67	123.21	123.21	4.56349	4.56349	1553	36	3.19117
162-982B-13H-2-W 20	111.7	123.24	123.24	4.56432	4.56432	1292	43	3.11126
162-982B-13H-2-W 22	111.72	123.26	123.26	4.56487	4.56487	1332	43	3.1245
162-982B-13H-2-W 23	111.73	123.27	123.27	4.56515	4.56515	1489	49	3.17289
162-982B-13H-2-W 27	111.77	123.31	123.31	4.56625	4.56625	1287	72	3.10958
162-982B-13H-2-W 34	111.84	123.38	123.38	4.56818	4.56818	1172	49	3.06893
162-982B-13H-2-W 36	111.86	123.4	123.4	4.56873	4.56873	1299	39	3.11361
162-982B-13H-2-W 37	111.87	123.41	123.41	4.56901	4.56901	1186	34	3.07408
162-982B-13H-2-W 40	111.9	123.44	123.44	4.56983	4.56983	1155	-1	3.06258
162-982B-13H-2-W 42	111.92	123.46	123.46	4.57038	4.57038	1207	57	3.08171
162-982B-13H-2-W 43	111.93	123.47	123.47	4.57066	4.57066	1087	79	3.03623
162-982B-13H-2-W 46	111.96	123.5	123.5	4.57149	4.57149	1070	47	3.02938
162-982B-13H-2-W 48	111.98	123.52	123.52	4.57204	4.57204	1482	59	3.17085
162-982B-13H-2-W 51	112.01	123.55	123.55	4.57286	4.57286	1412	22	3.14983
162-982B-13H-2-W 54	112.04	123.58	123.58	4.57369	4.57369	1479	40	3.16997
162-982B-13H-2-W 56	112.06	123.6	123.6	4.57424	4.57424	1361	53	3.13386
162-982B-13H-2-W 58	112.08	123.62	123.62	4.57479	4.57479	1706	76	3.23198
162-982B-13H-2-W 60	112.1	123.64	123.64	4.57534	4.57534	1751	20	3.24329
162-982B-13H-2-W 63	112.13	123.67	123.67	4.57617	4.57617	1900	92	3.27875
162-982B-13H-2-W 64	112.14	123.68	123.68	4.57645	4.57645	1864	96	3.27045
162-982B-13H-2-W 67	112.17	123.71	123.71	4.57727	4.57727	1936	67	3.28691
162-982B-13H-2-W 68	112.18	123.72	123.72	4.57755	4.57755	1694	132	3.22891
162-982B-13H-2-W 69	112.19	123.73	123.73	4.57783	4.57783	1859	45	3.26928
162-982B-13H-2-W 75	112.25	123.79	123.79	4.57948	4.57948	2526	74	3.40243
162-982B-13H-2-W 76	112.26	123.8	123.8	4.57975	4.57975	2233	71	3.34889
162-982B-13H-2-W 79	112.29	123.83	123.83	4.58058	4.58058	2615	104	3.41747
162-982B-13H-2-W 80	112.3	123.84	123.84	4.58086	4.58086	2436	89	3.38668
162-982B-13H-2-W 82	112.32	123.86	123.86	4.58141	4.58141	2449	58	3.38899
162-982B-13H-2-W 84	112.34	123.88	123.88	4.58196	4.58196	2233	61	3.34889
162-982B-13H-2-W 86	112.36	123.9	123.9	4.58251	4.58251	2241	118	3.35044
162-982B-13H-2-W 88	112.38	123.92	123.92	4.58306	4.58306	2278	94	3.35755
162-982B-13H-2-W 90	112.4	123.94	123.94	4.58361	4.58361	1879	38	3.27393
162-982B-13H-2-W 92	112.42	123.96	123.96	4.58416	4.58416	1740	92	3.24055
162-982B-13H-2-W 93	112.43	123.97	123.97	4.58444	4.58444	1546	102	3.18921
162-982B-13H-2-W 96	112.46	124	124	4.58527	4.58527	1636	57	3.21378
162-982B-13H-2-W 98	112.48	124.02	124.02	4.58582	4.58582	1668	106	3.2222
162-982B-13H-2-W 99	112.49	124.03	124.03	4.58609	4.58609	1803	102	3.256
162-982B-13H-2-W 102	112.52	124.06	124.06	4.58692	4.58692	1919	54	3.28307
162-982B-13H-2-W 103	112.53	124.07	124.07	4.5872	4.5872	2007	60	3.30255
162-982B-13H-2-W 106	112.56	124.1	124.1	4.58802	4.58802	1657	62	3.21932
162-982B-13H-2-W 108	112.58	124.12	124.12	4.58857	4.58857	1616	81	3.20844
162-982B-13H-2-W 109	112.59	124.13	124.13	4.58885	4.58885	1693	106	3.22866
162-982B-13H-2-W 115	112.65	124.19	124.19	4.5905	4.5905	1551	46	3.19061
162-982B-13H-2-W 116	112.66	124.2	124.2	4.59078	4.59078	1656	40	3.21906
162-982B-13H-2-W 118	112.68	124.22	124.22	4.59133	4.59133	1852	52	3.26764
162-982B-13H-2-W 120	112.7	124.24	124.24	4.59188	4.59188	1651	90	3.21775
162-982B-13H-2-W 122	112.72	124.26	124.26	4.59243	4.59243	1573	36	3.19673
162-982B-13H-2-W 125	112.75	124.29	124.29	4.59326	4.59326	1929	74	3.28533
162-982B-13H-2-W 127	112.77	124.31	124.31	4.59381	4.59381	1744	97	3.24155
162-982B-13H-2-W 128	112.78	124.32	124.32	4.59409	4.59409	1638	67	3.21431
162-982B-13H-2-W 130	112.8	124.34	124.34	4.59464	4.59464	1587	67	3.20058
162-982B-13H-2-W 131	112.81	124.35	124.35	4.59491	4.59491	1624	72	3.21059
162-982B-13H-2-W 132	112.82	124.36	124.36	4.59519	4.59519	1498	106	3.17551
162-982B-13H-2-W 133	112.83	124.37	124.37	4.59547	4.59547	1624	76	3.21059
162-982B-13H-2-W 136	112.86	124.4	124.4	4.59629	4.59629	1552	67	3.19089
162-982B-13H-2-W 138	112.88	124.42	124.42	4.59684	4.59684	1607	38	3.20602
162-982B-13H-2-W 139	112.89	124.43	124.43	4.59712	4.59712	1569	69	3.19562
162-982B-13H-2-W 142	112.92	124.46	124.46	4.59795	4.59795	1735	67	3.2393
162-982B-13H-2-W 144	112.94	124.48	124.48	4.5985	4.5985	1605	45	3.20548
162-982B-13H-2-W 147	112.97	124.51	124.51	4.59932	4.59932	1750	60	3.24304
162-982B-13H-2-W 148	112.98	124.52	124.52	4.5996	4.5996	1586	66	3.2003
162-982B-13H-3-W 4	113.04	124.58	124.58	4.60125	4.60125	1853	34	3.26788
162-982B-13H-3-W 6	113.06	124.6	124.6	4.60181	4.60181	1936	105	3.28691
162-982B-13H-3-W 8	113.08	124.62	124.62	4.60236	4.60236	1588	106	3.20085
162-982B-13H-3-W 10	113.1	124.64	124.64	4.60291	4.60291	1642	109	3.21537
162-982B-13H-3-W 13	113.13	124.67	124.67	4.60373	4.60373	1762	103	3.24601
162-982B-13H-3-W 14	113.14	124.68	124.68	4.60401	4.60401	1702	50	3.23096
162-982B-13H-3-W 16	113.16	124.7	124.7	4.60456	4.60456	1523	106	3.1827
162-982B-13H-3-W 18	113.18	124.72	124.72	4.60511	4.60511	1606	53	3.20575
162-982B-13H-3-W 20	113.2	124.74	124.74	4.60566	4.60566	1499	38	3.1758
162-982B-13H-3-W 22	113.22	124.76	124.76	4.60622	4.60622	1503	35	3.17696
162-982B-13H-3-W 25	113.25	124.79	124.79	4.60704	4.60704	1370	89	3.13672
162-982B-13H-3-W 26	113.26	124.8	124.8	4.60732	4.60732	1535	82	3.18611
162-982B-13H-3-W 28	113.28	124.82	124.82	4.60787	4.60787	1545	78	3.18893
162-982B-13H-3-W 29	113.29	124.83	124.83	4.60814	4.60814	1593	66	3.20222
162-982B-13H-3-W 32	113.32	124.86	124.86	4.60897	4.60897	1700	72	3.23045
162-982B-13H-3-W 33	113.33	124.87	124.87	4.60925	4.60925	1439	100	3.15806
162-982B-13H-3-W 36	113.36	124.9	124.9	4.61007	4.61007	1736	135	3.23955
162-982B-13H-3-W 37	113.37	124.91	124.91	4.61035	4.61035	1622	98	3.21005
162-982B-13H-3-W 38.5	113.39	124.93	124.93	4.6109	4.6109	1750	-17	3.24304
162-982B-13H-3-W 43	113.43	124.97	124.97	4.612	4.612	1547	81	3.18949
162-982B-13H-3-W 44	113.44	124.98	124.98	4.61228	4.61228	1748	62	3.24254
162-982B-13H-3-W 46	113.46	125	125	4.61283	4.61283	1722	104	3.23603
162-982B-13H-3-W 48	113.48	125.02	125.02	4.61338	4.61338	2029	94	3.30728
162-982B-13H-3-W 50	113.5	125.04	125.04	4.61393	4.61393	2145	102	3.33143
162-982B-13H-3-W 53	113.53	125.07	125.07	4.61476	4.61476	1745	83	3.2418
162-982B-13H-3-W 57	113.57	125.11	125.11	4.61586	4.61586	2078	33	3.31765
162-982B-13H-3-W 58	113.58	125.12	125.12	4.61614	4.61614	2250	64	3.35218
162-982B-13H-3-W 60	113.6	125.14	125.14	4.61669	4.61669	2137	99	3.3298
162-982B-13H-3-W 62	113.62	125.16	125.16	4.61724	4.61724	2213	52	3.34498
162-982B-13H-3-W 64	113.64	125.18	125.18	4.61779	4.61779	2187	51	3.33985
162-982B-13H-3-W 66.5	113.67	125.21	125.21	4.61862	4.61862	2527	76	3.40261
162-982B-13H-3-W 70	113.7	125.24	125.24	4.61945	4.61945	2370	54	3.37475
162-982B-13H-3-W 71	113.71	125.25	125.25	4.61972	4.61972	2650	71	3.42325
162-982B-13H-3-W 75	113.75	125.29	125.29	4.62082	4.62082	1938	89	3.28735
162-982B-13H-3-W 78	113.78	125.32	125.32	4.62165	4.62165	2669	66	3.42635
162-982B-13H-3-W 83.5	113.84	125.38	125.38	4.6233	4.6233	2508	48	3.39933
162-982B-13H-3-W 86	113.86	125.4	125.4	4.62386	4.62386	2407	99	3.38148
162-982B-13H-3-W 88	113.88	125.42	125.42	4.62441	4.62441	2207	73	3.3438
162-982B-13H-3-W 90	113.9	125.44	125.44	4.62496	4.62496	2274	86	3.35679
162-982B-13H-3-W 91	113.91	125.45	125.45	4.62523	4.62523	2344	119	3.36996
162-982B-13H-3-W 94	113.94	125.48	125.48	4.62606	4.62606	2023	79	3.306
162-982B-13H-3-W 96	113.96	125.5	125.5	4.62661	4.62661	2012	82	3.30363
162-982B-13H-3-W 99	113.99	125.53	125.53	4.62744	4.62744	1957	109	3.29159
162-982B-13H-3-W 100	114	125.54	125.54	4.62771	4.62771	2129	71	3.32818
162-982B-13H-3-W 102	114.02	125.56	125.56	4.62827	4.62827	1932	100	3.28601
162-982B-13H-3-W 103	114.03	125.57	125.57	4.62854	4.62854	1920	52	3.2833
162-982B-13H-3-W 104	114.04	125.58	125.58	4.62882	4.62882	1863	104	3.27021
162-982B-13H-3-W 106	114.06	125.6	125.6	4.62937	4.62937	2058	87	3.31345
162-982B-13H-3-W 107	114.07	125.61	125.61	4.62964	4.62964	1970	27	3.29447
162-982B-13H-3-W 110	114.1	125.64	125.64	4.63047	4.63047	1999	84	3.30081
162-982B-13H-3-W 111	114.11	125.65	125.65	4.63075	4.63075	2015	63	3.30428
162-982B-13H-3-W 114	114.14	125.68	125.68	4.63157	4.63157	2036	45	3.30878
162-982B-13H-3-W 116	114.16	125.7	125.7	4.63212	4.63212	1974	80	3.29535
162-982B-13H-3-W 117	114.17	125.71	125.71	4.6324	4.6324	1764	93	3.2465
162-982B-13H-3-W 118	114.18	125.72	125.72	4.63268	4.63268	1640	81	3.21484
162-982B-13H-3-W 119	114.19	125.73	125.73	4.63295	4.63295	1798	95	3.25479
162-982B-13H-3-W 123.5	114.24	125.78	125.78	4.63433	4.63433	1776	32	3.24944
162-982B-13H-3-W 125.5	114.26	125.8	125.8	4.63488	4.63488	1738	73	3.24005
162-982B-13H-3-W 127.5	114.28	125.82	125.82	4.63543	4.63543	1684	64	3.22634
162-982B-13H-3-W 130	114.3	125.84	125.84	4.63598	4.63598	1683	74	3.22608
162-982B-13H-3-W 132	114.32	125.86	125.86	4.63653	4.63653	1645	15	3.21617
162-982B-13H-3-W 135	114.35	125.89	125.89	4.63736	4.63736	1359	99	3.13322
162-982B-13H-3-W 136	114.36	125.9	125.9	4.63764	4.63764	1480	105	3.17026
162-982B-13H-3-W 138	114.38	125.92	125.92	4.63819	4.63819	1417	63	3.15137
162-982B-13H-3-W 140	114.4	125.94	125.94	4.63874	4.63874	1350	-1	3.13033
162-982B-13H-3-W 141	114.41	125.95	125.95	4.63902	4.63902	1458	55	3.16376
162-982B-13H-3-W 142	114.42	125.96	125.96	4.63929	4.63929	1476	130	3.16909
162-982B-13H-3-W 143	114.43	125.97	125.97	4.63957	4.63957	1236	56	3.09202
162-982B-13H-3-W 146	114.46	126	126	4.64039	4.64039	2036	41	3.30878
162-982B-13H-4-W 1	114.51	126.05	126.05	4.64177	4.64177	1580		3.19866
162-982B-13H-4-W 2	114.52	126.06	126.06	4.64205	4.64205	1652		3.21801
162-982B-13H-4-W 4	114.54	126.08	126.08	4.6426	4.6426	1585		3.20003
162-982B-13H-4-W 6	114.56	126.1	126.1	4.64315	4.64315	1560		3.19312
162-982B-13H-4-W 7	114.57	126.11	126.11	4.64343	4.64343	1390		3.14301
162-982B-13H-4-W 9	114.59	126.13	126.13	4.64398	4.64398	1436		3.15715
162-982B-13H-4-W 14	114.64	126.18	126.18	4.64535	4.64535	1520		3.18184
162-982B-13H-4-W 15	114.65	126.19	126.19	4.64563	4.64563	1403		3.14706
162-982B-13H-4-W 18	114.68	126.22	126.22	4.64646	4.64646	1367		3.13577
162-982B-13H-4-W 20	114.7	126.24	126.24	4.64701	4.64701	1301		3.11428
162-982B-13H-4-W 22	114.72	126.26	126.26	4.64756	4.64756	1289		3.11025
162-982B-13H-4-W 23	114.73	126.27	126.27	4.64784	4.64784	1497		3.17522
162-982B-13H-4-W 26	114.76	126.3	126.3	4.64866	4.64866	1540		3.18752
162-982B-13H-4-W 28	114.78	126.32	126.32	4.64921	4.64921	1473		3.1682
162-982B-13H-4-W 30	114.8	126.34	126.34	4.64976	4.64976	1362		3.13418
162-982B-13H-4-W 31	114.81	126.35	126.35	4.65004	4.65004	1492		3.17377
162-982B-13H-4-W 34	114.84	126.38	126.38	4.65087	4.65087	1536		3.18639
162-982B-13H-4-W 35.5	114.86	126.4	126.4	4.65142	4.65142	1546		3.18921
162-982B-13H-4-W 38	114.88	126.42	126.42	4.65197	4.65197	1712		3.2335
162-982B-13H-4-W 40	114.9	126.44	126.44	4.65252	4.65252	1719		3.23528
162-982B-13H-4-W 42	114.92	126.46	126.46	4.65307	4.65307	1942		3.28825
162-982B-13H-4-W 44	114.94	126.48	126.48	4.65362	4.65362	1586		3.2003
162-982B-13H-4-W 46	114.96	126.5	126.5	4.65417	4.65417	1618		3.20898
162-982B-13H-4-W 53	115.03	126.57	126.57	4.6561	4.6561	2018		3.30492
162-982B-13H-4-W 55	115.05	126.59	126.59	4.65666	4.65666	2236		3.34947
162-982B-13H-4-W 58	115.08	126.62	126.62	4.65748	4.65748	2051		3.31197
162-982B-13H-4-W 59	115.09	126.63	126.63	4.65776	4.65776	2129		3.32818
162-982B-13H-4-W 62	115.12	126.66	126.66	4.65858	4.65858	2608		3.41631
162-982B-13H-4-W 63	115.13	126.67	126.67	4.65886	4.65886	2334		3.3681
162-982B-13H-4-W 66	115.16	126.7	126.7	4.65969	4.65969	2502		3.39829
162-982B-13H-4-W 67	115.17	126.71	126.71	4.65996	4.65996	2781		3.4442
162-982B-13H-4-W 69.5	115.2	126.74	126.74	4.66079	4.66079	2843		3.45378
162-982B-13H-4-W 71.5	115.22	126.76	126.76	4.66134	4.66134	2602		3.41531
162-982B-13H-4-W 74	115.24	126.78	126.78	4.66189	4.66189	2992		3.47596
162-982B-13H-4-W 75	115.25	126.79	126.79	4.66217	4.66217	2837		3.45286
162-982B-13H-4-W 77.5	115.28	126.82	126.82	4.66299	4.66299	2802		3.44747
162-982B-13H-4-W 80	115.3	126.84	126.84	4.66355	4.66355	2879		3.45924
162-982B-13H-4-W 82	115.32	126.86	126.86	4.6641	4.6641	2400		3.38021
162-982B-13H-4-W 83	115.33	126.87	126.87	4.66437	4.66437	2851		3.455
162-982B-13H-4-W 84	115.34	126.88	126.88	4.66465	4.66465	2667		3.42602
162-982B-13H-4-W 86	115.36	126.9	126.9	4.6652	4.6652	2741		3.43791
162-982B-13H-4-W 88	115.38	126.92	126.92	4.66575	4.66575	2690		3.42975
162-982B-13H-4-W 89	115.39	126.93	126.93	4.66603	4.66603	2620		3.4183
162-982B-13H-4-W 93	115.43	126.97	126.97	4.66713	4.66713	2191		3.34064
162-982B-13H-4-W 94	115.44	126.98	126.98	4.66741	4.66741	2545		3.40569
162-982B-13H-4-W 98	115.48	127.02	127.02	4.66851	4.66851	3536		3.54851
162-982B-13H-4-W 102	115.52	127.06	127.06	4.66961	4.66961	4290		3.63246
162-982B-13H-4-W 103	115.53	127.07	127.07	4.66989	4.66989	4867		3.68726
162-982B-13H-4-W 105.5	115.56	127.1	127.1	4.67071	4.67071	3219		3.50772
162-982B-13H-4-W 108	115.58	127.12	127.12	4.67126	4.67126	2312		3.36399
162-982B-13H-4-W 110.5	115.61	127.15	127.15	4.67209	4.67209	2205		3.34341
162-982B-13H-4-W 111.5	115.62	127.16	127.16	4.67237	4.67237	2782		3.44436
162-982B-13H-4-W 114	115.64	127.18	127.18	4.67292	4.67292	2122		3.32675
162-982B-13H-4-W 116	115.66	127.2	127.2	4.67347	4.67347	1865		3.27068
162-982B-13H-4-W 119	115.69	127.23	127.23	4.6743	4.6743	1858		3.26905
162-982B-13H-4-W 120	115.7	127.24	127.24	4.67457	4.67457	2007		3.30255
162-982B-13H-4-W 121	115.71	127.25	127.25	4.67485	4.67485	1946		3.28914
162-982B-13H-4-W 123	115.73	127.27	127.27	4.6754	4.6754	1776		3.24944
162-982B-13H-4-W 125	115.75	127.29	127.29	4.67595	4.67595	1802		3.25575
162-982B-13H-4-W 126	115.76	127.3	127.3	4.67623	4.67623	1985		3.29776
162-982B-13H-4-W 128	115.78	127.32	127.32	4.67678	4.67678	1641		3.21511
162-982B-13H-4-W 129	115.79	127.33	127.33	4.67705	4.67705	1691		3.22814
162-982B-13H-4-W 135	115.85	127.39	127.39	4.67871	4.67871	1673		3.2235
162-982B-13H-4-W 137	115.87	127.41	127.41	4.67926	4.67926	1875		3.273
162-982B-13H-4-W 138	115.88	127.42	127.42	4.67953	4.67953	1606		3.20575
162-982B-13H-4-W 141	115.91	127.45	127.45	4.68036	4.68036	1740		3.24055
162-982B-13H-4-W 142	115.92	127.46	127.46	4.68064	4.68064	1631		3.21245
162-982B-13H-4-W 145	115.95	127.49	127.49	4.68146	4.68146	1485		3.17173
162-982B-13H-4-W 146	115.96	127.5	127.5	4.68174	4.68174	1719		3.23528
162-982B-13H-5-W 2	116.02	127.56	127.56	4.68339	4.68339	1905	100	3.27989
162-982B-13H-5-W 6	116.06	127.6	127.6	4.68449	4.68449	1622	23	3.21005
162-982B-13H-5-W 9	116.09	127.63	127.63	4.68532	4.68532	1811	30	3.25792
162-982B-13H-5-W 10	116.1	127.64	127.64	4.6856	4.6856	1659	22	3.21985
162-982B-13H-5-W 11	116.11	127.65	127.65	4.68587	4.68587	1744	100	3.24155
162-982B-13H-5-W 16	116.16	127.7	127.7	4.68725	4.68725	1473	52	3.1682
162-982B-13H-5-W 18	116.18	127.72	127.72	4.6878	4.6878	1401	39	3.14644
162-982B-13H-5-W 19	116.19	127.73	127.73	4.68808	4.68808	1643	120	3.21564
162-982B-13H-5-W 26	116.26	127.8	127.8	4.69001	4.69001	1462	55	3.16495
162-982B-13H-5-W 31	116.31	127.85	127.85	4.69138	4.69138	1912	58	3.28149
162-982B-13H-5-W 32	116.32	127.86	127.86	4.69166	4.69166	1723	68	3.23629
162-982B-13H-5-W 37	116.37	127.91	127.91	4.69304	4.69304	1611	58	3.2071
162-982B-13H-5-W 39	116.39	127.93	127.93	4.69359	4.69359	1547	52	3.18949
162-982B-13H-5-W 42	116.42	127.96	127.96	4.69442	4.69442	1514	96	3.18013
162-982B-13H-5-W 44	116.44	127.98	127.98	4.69497	4.69497	1509	67	3.17869
162-982B-13H-5-W 47	116.47	128.01	128.01	4.69579	4.69579	1762	79	3.24601
162-982B-13H-5-W 48	116.48	128.02	128.02	4.69607	4.69607	1810	72	3.25768
162-982B-13H-5-W 51	116.51	128.05	128.05	4.6969	4.6969	1979	77	3.29645
162-982B-13H-5-W 52	116.52	128.06	128.06	4.69717	4.69717	1870	36	3.27184
162-982B-13H-5-W 54	116.54	128.08	128.08	4.69772	4.69772	1736	107	3.23955
162-982B-13H-5-W 56	116.56	128.1	128.1	4.69817	4.69819	1774	98	3.24895
162-982B-13H-5-W 57	116.57	128.11	128.11	4.69834	4.69837	1831	58	3.26269
162-982B-13H-5-W 64	116.64	128.18	128.18	4.69953	4.69968	1815	86	3.25888
162-982B-13H-5-W 65	116.65	128.19	128.19	4.6997	4.69986	1707	65	3.23223
162-982B-13H-5-W 68	116.68	128.22	128.22	4.70021	4.70042	1730	85	3.23805
162-982B-13H-5-W 69	116.69	128.23	128.23	4.70038	4.70061	1767	103	3.24724
162-982B-13H-5-W 73	116.73	128.27	128.27	4.70106	4.70135	1754	103	3.24403
162-982B-13H-5-W 74	116.74	128.28	128.28	4.70123	4.70154	1861	67	3.26975
162-982B-13H-5-W 76	116.76	128.3	128.3	4.70157	4.70191	1714	68	3.23401
162-982B-13H-5-W 81	116.81	128.35	128.35	4.70242	4.70284	1765	74	3.24674
162-982B-13H-5-W 82	116.82	128.36	128.36	4.70259	4.70303	1796	117	3.25431
162-982B-13H-5-W 83	116.83	128.37	128.37	4.70276	4.70321	1742	44	3.24105
162-982B-13H-5-W 86	116.86	128.4	128.4	4.70327	4.70377	1775	47	3.2492
162-982B-13H-5-W 89	116.89	128.43	128.43	4.70378	4.70433	1733	7	3.2388
162-982B-13H-5-W 90	116.9	128.44	128.44	4.70395	4.70452	1651	150	3.21775
162-982B-13H-5-W 93	116.93	128.47	128.47	4.70446	4.70508	1192	80	3.07628
162-982B-13H-5-W 97	116.97	128.51	128.51	4.70514	4.70582	1398	102	3.14551
162-982B-13H-5-W 98	116.98	128.52	128.52	4.70531	4.70601	1463	92	3.16524
162-982B-13H-5-W 104	117.04	128.58	128.58	4.70633	4.70712	1339	47	3.12678
162-982B-13H-5-W 105	117.05	128.59	128.59	4.7065	4.70731	1312	58	3.11793
162-982B-13H-5-W 108	117.08	128.62	128.62	4.70701	4.70787	1415	95	3.15076
162-982B-13H-5-W 109	117.09	128.63	128.63	4.70718	4.70805	1225	69	3.08814
162-982B-13H-5-W 112	117.12	128.66	128.66	4.70769	4.70861	1554	67	3.19145
162-982B-13H-5-W 113	117.13	128.67	128.67	4.70786	4.7088	1574	81	3.197
162-982B-13H-5-W 117	117.17	128.71	128.71	4.70854	4.70954	1680	63	3.22531
162-982B-13H-5-W 118	117.18	128.72	128.72	4.70871	4.70973	1649	63	3.21722
162-982B-13H-5-W 121	117.21	128.75	128.75	4.70923	4.71029	1615	38	3.20817
162-982B-13H-5-W 122	117.22	128.76	128.76	4.7094	4.71047	1631	71	3.21245
162-982B-13H-5-W 125	117.25	128.79	128.79	4.70991	4.71103	1733	107	3.2388
162-982B-13H-5-W 126	117.26	128.8	128.8	4.71008	4.71122	1584	59	3.19976
162-982B-13H-5-W 128.5	117.29	128.83	128.83	4.71059	4.71178	1673	56	3.2235
162-982B-13H-5-W 129.5	117.3	128.84	128.84	4.71076	4.71196	1462	101	3.16495
162-982B-13H-5-W 132.5	117.33	128.87	128.87	4.71127	4.71252	1603	108	3.20493
162-982B-13H-5-W 133.4	117.33	128.87	128.87	4.71127	4.71252	1248	139	3.09621
162-982B-13H-5-W 136	117.36	128.9	128.9	4.71178	4.71308	1540	40	3.18752
162-982B-13H-5-W 137	117.37	128.91	128.91	4.71195	4.71327	1552	69	3.19089
162-982B-13H-5-W 143.5	117.44	128.98	128.98	4.71314	4.71457	1472	61	3.16791
162-982B-13H-5-W 146	117.46	129	129	4.71348	4.71494	1465	111	3.16584
162-982B-13H-5-W 148	117.48	129.02	129.02	4.71382	4.71532	1568	78	3.19535
162-982B-13H-6-W 2	117.52	129.06	129.06	4.7145	4.71606	1669	62	3.22246
162-982B-13H-6-W 3	117.53	129.07	129.07	4.71467	4.71625	1621	99	3.20978
162-982B-13H-6-W 5.5	117.56	129.1	129.1	4.71518	4.71681	1522	42	3.18241
162-982B-13H-6-W 8	117.58	129.12	129.12	4.71552	4.71718	1568	73	3.19535
162-982B-13H-6-W 11	117.61	129.15	129.15	4.71603	4.71774	1494	25	3.17435
162-982B-13H-6-W 12	117.62	129.16	129.16	4.7162	4.71792	1509	59	3.17869
162-982B-13H-6-W 13	117.63	129.17	129.17	4.71637	4.71811	1682	72	3.22583
162-982B-13H-6-W 16	117.66	129.2	129.2	4.71688	4.71867	1285	20	3.1089
162-982B-13H-6-W 19	117.69	129.23	129.23	4.71739	4.71923	1584	100	3.19976
162-982B-13H-6-W 20	117.7	129.24	129.24	4.71756	4.71941	1514	49	3.18013
162-982B-13H-6-W 24	117.74	129.28	129.28	4.71824	4.72016	1434	58	3.15655
162-982B-13H-6-W 27	117.77	129.31	129.31	4.71875	4.72072	1585	81	3.20003
162-982B-13H-6-W 28	117.78	129.32	129.32	4.71892	4.7209	1876	50	3.27323
162-982B-13H-6-W 29	117.79	129.33	129.33	4.71909	4.72109	1746	55	3.24204
162-982B-13H-6-W 34	117.84	129.38	129.38	4.71994	4.72202	1799	82	3.25503
162-982B-13H-6-W 37	117.87	129.41	129.41	4.72045	4.72258	1773	48	3.24871
162-982B-13H-6-W 38	117.88	129.42	129.42	4.72062	4.72276	1799	59	3.25503
162-982B-13H-6-W 41	117.91	129.45	129.45	4.72113	4.72332	1762	96	3.24601
162-982B-13H-6-W 43	117.93	129.47	129.47	4.72147	4.72369	1812	80	3.25816
162-982B-13H-6-W 44	117.94	129.48	129.48	4.72164	4.72388	1820	73	3.26007
162-982B-13H-6-W 46	117.96	129.5	129.5	4.72198	4.72425	1956	121	3.29137
162-982B-13H-6-W 51	118.01	129.55	129.55	4.72283	4.72518	2057	54	3.31323
162-982B-13H-6-W 52	118.02	129.56	129.56	4.723	4.72537	2315	83	3.36455
162-982B-13H-6-W 53	118.03	129.57	129.57	4.72317	4.72556	2337	126	3.36866
162-982B-13H-6-W 56	118.06	129.6	129.6	4.72368	4.72612	2247	117	3.3516
162-982B-13H-6-W 57	118.07	129.61	129.61	4.72385	4.7263	2407	81	3.38148
162-982B-13H-6-W 61	118.11	129.65	129.65	4.72453	4.72705	2338	84	3.36884
162-982B-13H-6-W 62	118.12	129.66	129.66	4.7247	4.72723	2369	43	3.37457
162-982B-13H-6-W 67	118.17	129.71	129.71	4.72555	4.72816	2425	27	3.38471
162-982B-13H-6-W 68	118.18	129.72	129.72	4.72572	4.72835	2544	63	3.40552
162-982B-13H-6-W 73.5	118.24	129.78	129.78	4.72674	4.72947	2663	82	3.42537
162-982B-13H-6-W 76	118.26	129.8	129.8	4.72708	4.72984	2610	127	3.41664
162-982B-13H-6-W 78	118.28	129.82	129.82	4.72742	4.73021	2477	52	3.39393
162-982B-13H-6-W 79	118.29	129.83	129.83	4.72759	4.7304	2471	95	3.39287
162-982B-13H-6-W 82	118.32	129.86	129.86	4.7281	4.73096	2466	72	3.39199
162-982B-13H-6-W 83	118.33	129.87	129.87	4.72827	4.73114	2597	65	3.41447
162-982B-13H-6-W 85.5	118.36	129.9	129.9	4.72878	4.7317	2625	34	3.41913
162-982B-13H-6-W 88	118.38	129.92	129.92	4.72912	4.73207	2525	141	3.40226
162-982B-13H-6-W 90	118.4	129.94	129.94	4.72946	4.73245	1908	76	3.28058
162-982B-13H-6-W 92	118.42	129.96	129.96	4.7298	4.73282	2030	53	3.3075
162-982B-13H-6-W 94	118.44	129.98	129.98	4.73014	4.73319	1755	131	3.24428
162-982B-13H-6-W 97	118.47	130.01	130.01	4.73066	4.73375	1567	68	3.19507
162-982B-13H-6-W 98	118.48	130.02	130.02	4.73083	4.73394	1600	106	3.20412
162-982B-13H-6-W 101	118.51	130.05	130.05	4.73134	4.73449	1567	79	3.19507
162-982B-13H-6-W 102	118.52	130.06	130.06	4.73151	4.73468	1500	89	3.17609
162-982B-13H-6-W 103	118.53	130.07	130.07	4.73168	4.73487	1653	43	3.21827
162-982B-13H-6-W 104	118.54	130.08	130.08	4.73185	4.73505	1709	39	3.23274
162-982B-13H-6-W 107	118.57	130.11	130.11	4.73236	4.73561	1450	22	3.16137
162-982B-13H-6-W 108	118.58	130.12	130.12	4.73253	4.7358	1499	91	3.1758
162-982B-13H-6-W 109	118.59	130.13	130.13	4.7327	4.73598	1433	64	3.15625
162-982B-13H-6-W 115	118.65	130.19	130.19	4.73372	4.7371	1438	79	3.15776
162-982B-13H-6-W 116	118.66	130.2	130.2	4.73389	4.73729	1315	29	3.11893
162-982B-13H-6-W 118	118.68	130.22	130.22	4.73423	4.73766	1389	33	3.1427
162-982B-13H-6-W 119	118.69	130.23	130.23	4.7344	4.73785	1524	60	3.18298
162-982B-13H-6-W 122	118.72	130.26	130.26	4.73491	4.7384	1626	66	3.21112
162-982B-13H-6-W 124	118.74	130.28	130.28	4.73525	4.73878	1740	67	3.24055
162-982B-13H-6-W 125	118.75	130.29	130.29	4.73542	4.73896	1547	71	3.18949
162-982B-13H-6-W 128	118.78	130.32	130.32	4.73593	4.73952	1705	67	3.23172
162-982B-13H-6-W 130	118.8	130.34	130.34	4.73627	4.73989	1731	51	3.2383
162-982B-13H-6-W 132.5	118.83	130.37	130.37	4.73678	4.74045	1708	50	3.23249
162-982B-13H-6-W 135	118.85	130.39	130.39	4.73712	4.74082	1844	94	3.26576
162-982B-13H-6-W 136	118.86	130.4	130.4	4.73729	4.74101	1776	81	3.24944
162-982B-13H-6-W 137	118.87	130.41	130.41	4.73746	4.7412	1755	138	3.24428
162-982B-13H-6-W 140.5	118.91	130.45	130.45	4.73814	4.74194	1677	59	3.22453
162-982B-13H-6-W 143	118.93	130.47	130.47	4.73848	4.74231	1676	63	3.22427
162-982B-13H-6-W 144	118.94	130.48	130.48	4.73865	4.7425	1513	31	3.17984
162-982B-13H-6-W 146	118.96	130.5	130.5	4.73899	4.74287	1405	71	3.14768
162-982B-13H-6-W 148	118.98	130.52	130.52	4.73933	4.74324	1683	4	3.22608
162-982B-14H-1-W 5	119.55	132.05	132.15	4.76535	4.77173	1871	93	3.27207
162-982B-14H-1-W 6	119.56	132.06	132.16	4.76552	4.77192	1754	17	3.24403
162-982B-14H-1-W 8	119.58	132.08	132.18	4.76586	4.77229	1743	78	3.2413
162-982B-14H-1-W 10	119.6	132.1	132.2	4.7662	4.77266	1724	34	3.23654
162-982B-14H-1-W 12	119.62	132.12	132.22	4.76654	4.77304	1968	71	3.29403
162-982B-14H-1-W 16	119.66	132.16	132.26	4.76722	4.77378	2178	85	3.33806
162-982B-14H-1-W 18	119.68	132.18	132.28	4.76756	4.77415	2506	44	3.39898
162-982B-14H-1-W 20	119.7	132.2	132.3	4.7679	4.77453	2448	73	3.38881
162-982B-14H-1-W 22	119.72	132.22	132.32	4.76824	4.7749	2560	133	3.40824
162-982B-14H-1-W 24	119.74	132.24	132.34	4.76858	4.77527	3026	78	3.48087
162-982B-14H-1-W 26	119.76	132.26	132.36	4.76892	4.77564	2858	58	3.45606
162-982B-14H-1-W 27	119.77	132.27	132.37	4.76909	4.77583	2873	77	3.45834
162-982B-14H-1-W 30	119.8	132.3	132.4	4.7696	4.77639	3173	91	3.50147
162-982B-14H-1-W 32	119.82	132.32	132.42	4.76994	4.77676	3069	76	3.487
162-982B-14H-1-W 33	119.83	132.33	132.43	4.77011	4.77695	3690	137	3.56703
162-982B-14H-1-W 34	119.84	132.34	132.44	4.77028	4.77713	3151	66	3.49845
162-982B-14H-1-W 36	119.86	132.36	132.46	4.77062	4.7775	3531	37	3.5479
162-982B-14H-1-W 37	119.87	132.37	132.47	4.77079	4.77769	3492	76	3.54307
162-982B-14H-1-W 38	119.88	132.38	132.48	4.77096	4.77788	3603	49	3.55666
162-982B-14H-1-W 44	119.94	132.44	132.54	4.77198	4.77899	2574	38	3.41061
162-982B-14H-1-W 45.5	119.96	132.46	132.56	4.77232	4.77937	2712	56	3.43329
162-982B-14H-1-W 49	119.99	132.49	132.59	4.77283	4.77992	2488	74	3.39585
162-982B-14H-1-W 50	120	132.5	132.6	4.773	4.78011	2290	98	3.35984
162-982B-14H-1-W 51	120.01	132.51	132.61	4.77317	4.7803	2142	75	3.33082
162-982B-14H-1-W 55	120.05	132.55	132.65	4.77386	4.78104	2078	73	3.31765
162-982B-14H-1-W 56	120.06	132.56	132.66	4.77403	4.78123	2254	23	3.35295
162-982B-14H-1-W 58	120.08	132.58	132.68	4.77437	4.7816	2119	58	3.32613
162-982B-14H-1-W 60	120.1	132.6	132.7	4.77471	4.78197	2052	42	3.31218
162-982B-14H-1-W 63	120.13	132.63	132.73	4.77522	4.78253	1763	53	3.24625
162-982B-14H-1-W 64	120.14	132.64	132.74	4.77539	4.78272	1550	86	3.19033
162-982B-14H-1-W 67	120.17	132.67	132.77	4.7759	4.78328	1554	70	3.19145
162-982B-14H-1-W 68	120.18	132.68	132.78	4.77607	4.78346	1578	68	3.19811
162-982B-14H-1-W 71	120.21	132.71	132.81	4.77658	4.78402	1664	54	3.22115
162-982B-14H-1-W 72	120.22	132.72	132.82	4.77675	4.78421	1612	48	3.20737
162-982B-14H-1-W 74	120.24	132.74	132.84	4.77709	4.78458	1558	106	3.19257
162-982B-14H-1-W 75	120.25	132.75	132.85	4.77726	4.78477	1775	49	3.2492
162-982B-14H-1-W 78	120.28	132.78	132.88	4.77777	4.78532	1747	97	3.24229
162-982B-14H-1-W 79	120.29	132.79	132.89	4.77794	4.78551	1772	60	3.24846
162-982B-14H-1-W 83.5	120.34	132.84	132.94	4.77879	4.78644	1429	56	3.15503
162-982B-14H-1-W 88	120.38	132.88	132.98	4.77947	4.78719	1505	31	3.17754
162-982B-14H-1-W 89	120.39	132.89	132.99	4.77964	4.78737	1393	25	3.14395
162-982B-14H-1-W 90	120.4	132.9	133	4.77981	4.78756	1409	72	3.14891
162-982B-14H-1-W 92	120.42	132.92	133.02	4.78015	4.78793	1441	47	3.15866
162-982B-14H-1-W 94	120.44	132.94	133.04	4.78049	4.7883	1440	33	3.15836
162-982B-14H-1-W 96	120.46	132.96	133.06	4.78083	4.78868	1549	55	3.19005
162-982B-14H-1-W 97	120.47	132.97	133.07	4.781	4.78886	1649	59	3.21722
162-982B-14H-1-W 98	120.48	132.98	133.08	4.78117	4.78905	1463	93	3.16524
162-982B-14H-1-W 100	120.5	133	133.1	4.78151	4.78942	1614	85	3.2079
162-982B-14H-1-W 102	120.52	133.02	133.12	4.78185	4.78979	1457	61	3.16346
162-982B-14H-1-W 105	120.55	133.05	133.15	4.78236	4.79035	1323	106	3.12156
162-982B-14H-1-W 106	120.56	133.06	133.16	4.78253	4.79054	1509	96	3.17869
162-982B-14H-1-W 107	120.57	133.07	133.17	4.7827	4.79072	1461	65	3.16465
162-982B-14H-1-W 111	120.61	133.11	133.21	4.78338	4.79147	1366	68	3.13545
162-982B-14H-1-W 112	120.62	133.12	133.22	4.78355	4.79165	1580	75	3.19866
162-982B-14H-1-W 113	120.63	133.13	133.23	4.78372	4.79184	1314	79	3.1186
162-982B-14H-1-W 117	120.67	133.17	133.27	4.7844	4.79259	1577	11	3.19783
162-982B-14H-1-W 118	120.68	133.18	133.28	4.78457	4.79277	1517	72	3.18099
162-982B-14H-1-W 119	120.69	133.19	133.29	4.78474	4.79296	1564	82	3.19424
162-982B-14H-1-W 123.5	120.74	133.24	133.34	4.78559	4.79389	1443	91	3.15927
162-982B-14H-1-W 126	120.76	133.26	133.36	4.78593	4.79426	1832	89	3.26293
162-982B-14H-1-W 128	120.78	133.28	133.38	4.78627	4.79463	1939	60	3.28758
162-982B-14H-1-W 130	120.8	133.3	133.4	4.78661	4.79501	1619	72	3.20925
162-982B-14H-1-W 132	120.82	133.32	133.42	4.78695	4.79538	1521	41	3.18213
162-982B-14H-1-W 133	120.83	133.33	133.43	4.78712	4.79556	1323	78	3.12156
162-982B-14H-1-W 136.5	120.87	133.37	133.47	4.7878	4.79631	1986	42	3.29798
162-982B-14H-1-W 139	120.89	133.39	133.49	4.78814	4.79668	1596	30	3.20303
162-982B-14H-1-W 140	120.9	133.4	133.5	4.78831	4.79687	1413	86	3.15014
162-982B-14H-2-W 2	121.02	133.52	133.62	4.79035	4.7991	1571	62	3.19618
982	121.03	133.53	133.63	4.79052	4.79929		66
982	121.06	133.56	133.66	4.79103	4.79985	1277	38	3.10619
982	121.08	133.58	133.68	4.79137	4.80022	1327	64	3.12287
982	121.09	133.59	133.69	4.79154	4.80041	1321	59	3.1209
982	121.14	133.64	133.74	4.79239	4.80134	1507	51	3.17811
982	121.17	133.67	133.77	4.7929	4.8019	1366	35	3.13545
982	121.18	133.68	133.78	4.79307	4.80208	1452	28	3.16197
982	121.2	133.7	133.8	4.79341	4.80245	1556	59	3.19201
982	121.22	133.72	133.82	4.79375	4.80283	1638	28	3.21431
982	121.24	133.74	133.84	4.79409	4.8032	1533	64	3.18554
982	121.27	133.77	133.87	4.7946	4.80376	1503	108	3.17696
982	121.28	133.78	133.88	4.79477	4.80394	1552	60	3.19089
982	121.3	133.8	133.9	4.79511	4.80432	1682	122	3.22583
982	121.31	133.81	133.91	4.79529	4.8045	1532	91	3.18526
982	121.34	133.84	133.94	4.7958	4.80506	1700	73	3.23045
982	121.36	133.86	133.96	4.79614	4.80543	1399	51	3.14582
982	121.38	133.88	133.98	4.79648	4.80581	1532	14	3.18526
982	121.41	133.91	134.01	4.79699	4.80636	1533	50	3.18554
982	121.42	133.92	134.02	4.79716	4.80655	1393	35	3.14395
982	121.44	133.94	134.04	4.7975	4.80692	1524	89	3.18298
982	121.45	133.95	134.05	4.79767	4.80711	1460	105	3.16435
982	121.46	133.96	134.06	4.79784	4.80729	1388	74	3.14239
982	121.48	133.98	134.08	4.79818	4.80767	1515	47	3.18041
982	121.49	133.99	134.09	4.79835	4.80785	1574	60	3.197
982	121.54	134.04	134.14	4.7992	4.80878	1737	55	3.2398
982	121.56	134.06	134.16	4.79954	4.80916	1526	71	3.18355
982	121.58	134.08	134.18	4.79988	4.80953	1557	77	3.19229
982	121.6	134.1	134.2	4.80022	4.8099	1732	98	3.23855
982	121.62	134.12	134.22	4.80056	4.81027	1738	71	3.24005
982	121.65	134.15	134.25	4.80107	4.81083	1914	93	3.28194
982	121.66	134.16	134.26	4.80124	4.81102	1909	52	3.28081
982	121.67	134.17	134.27	4.80141	4.81121	1587	71	3.20058
982	121.7	134.2	134.3	4.80192	4.81176	1693	100	3.22866
982	121.72	134.22	134.32	4.80226	4.81214	1864	65	3.27045
982	121.74	134.24	134.34	4.8026	4.81251	1806	4	3.25672
982	121.78	134.28	134.38	4.80328	4.81325	1938	87	3.28735
982	121.8	134.3	134.4	4.80362	4.81363	1722	79	3.23603
982	121.82	134.32	134.42	4.80396	4.814	1790	58	3.25285
982	121.85	134.35	134.45	4.80447	4.81456	2055	56	3.31281
982	121.86	134.36	134.46	4.80464	4.81474	1651	40	3.21775
982	121.88	134.38	134.48	4.80498	4.81512	1844	12	3.26576
982	121.94	134.44	134.54	4.806	4.81623	1912	19	3.28149
982	121.95	134.45	134.55	4.80617	4.81642	1901	39	3.27898
982	121.98	134.48	134.58	4.80668	4.81698	2053	13	3.31239
982	121.99	134.49	134.59	4.80685	4.81716	1982	58	3.2971
982	122.02	134.52	134.62	4.80736	4.81772	1878	118	3.2737
982	122.04	134.54	134.64	4.8077	4.81809	1808	79	3.2572
982	122.05	134.55	134.65	4.80787	4.81828	2068	85	3.31555
982	122.08	134.58	134.68	4.80838	4.81884	2038	52	3.3092
982	122.1	134.6	134.7	4.80872	4.81921	1915	84	3.28217
982	122.12	134.62	134.72	4.80906	4.81958	1959	99	3.29203
982	122.15	134.65	134.75	4.80957	4.82014	1967	37	3.2938
982	122.16	134.66	134.76	4.80974	4.82033	1841	54	3.26505
982	122.18	134.68	134.78	4.81008	4.8207	1868	98	3.27138
982	122.19	134.69	134.79	4.81025	4.82089	1770	127	3.24797
982	122.22	134.72	134.82	4.81076	4.82145	1713	34	3.23376
982	122.24	134.74	134.84	4.8111	4.82182	1732	44	3.23855
982	122.27	134.77	134.87	4.81161	4.82238	1778	44	3.24993
982	122.29	134.79	134.89	4.81195	4.82275	1600	23	3.20412
982	122.34	134.84	134.94	4.8128	4.82368	1848	-29	3.2667
982	122.36	134.86	134.96	4.81314	4.82405	1601	36	3.20439
982	122.38	134.88	134.98	4.81348	4.82442	1593	27	3.20222
982	122.39	134.89	134.99	4.81365	4.82461	1965	112	3.29336
982	122.42	134.92	135.02	4.81416	4.82517	1823	53	3.26079
982	122.43	134.93	135.03	4.81433	4.82536	1663	50	3.22089
982	122.53	135.03	135.13	4.81603	4.82722	1989	104	3.29863
982	122.54	135.04	135.14	4.8162	4.8274	1616	99	3.20844
982	122.59	135.09	135.19	4.81706	4.82833	1516	74	3.1807
982	122.6	135.1	135.2	4.81723	4.82852	1607	56	3.20602
982	122.63	135.13	135.23	4.81774	4.82908	1223	26	3.08743
982	122.64	135.14	135.24	4.81791	4.82927	1480	63	3.17026
982	122.65	135.15	135.25	4.81808	4.82945	1513	128	3.17984
982	122.68	135.18	135.28	4.81859	4.83001	1590	22	3.2014
982	122.69	135.19	135.29	4.81876	4.8302	1379	56	3.13956
982	122.74	135.24	135.34	4.81961	4.83113	1421	14	3.15259
982	122.75	135.25	135.35	4.81978	4.83131	1517	88	3.18099
982	122.77	135.27	135.37	4.82012	4.83169	1456	90	3.16316
982	122.8	135.3	135.4	4.82063	4.83224	1602	76	3.20466
982	122.81	135.31	135.41	4.8208	4.83243	1552	101	3.19089
982	122.84	135.34	135.44	4.82131	4.83299	1617	27	3.20871
982	122.87	135.37	135.47	4.82182	4.83355	1734	84	3.23905
982	122.88	135.38	135.48	4.82199	4.83373	1788	93	3.25237
982	122.9	135.4	135.5	4.82233	4.83411	2037	76	3.30899
982	122.93	135.43	135.53	4.82284	4.83467	1507	79	3.17811
982	122.94	135.44	135.54	4.82301	4.83485	1705	67	3.23172
982	122.96	135.46	135.56	4.82335	4.83522	1825	47	3.26126
982	122.97	135.47	135.57	4.82352	4.83541	1826	68	3.2615
982	123.01	135.51	135.61	4.8242	4.83615	1818	41	3.25959
982	123.02	135.52	135.62	4.82437	4.83634	2006	121	3.30233
982	123.05	135.55	135.65	4.82488	4.8369	1762	56	3.24601
982	123.06	135.56	135.66	4.82505	4.83709	2027	82	3.30685
982	123.08	135.58	135.68	4.82539	4.83746	1796	81	3.25431
982	123.13	135.63	135.73	4.82624	4.83839	2098	90	3.32181
982	123.14	135.64	135.74	4.82641	4.83858	1839	98	3.26458
982	123.19	135.69	135.79	4.82726	4.83951	1838	85	3.26435
982	123.21	135.71	135.81	4.8276	4.83988	1616	51	3.20844
982	123.22	135.72	135.82	4.82777	4.84006	1717	91	3.23477
982	123.23	135.73	135.83	4.82794	4.84025	2011	68	3.30341
982	123.28	135.78	135.88	4.82879	4.84118	1847	40	3.26647
982	123.3	135.8	135.9	4.82913	4.84155	1771	55	3.24822
982	123.31	135.81	135.91	4.8293	4.84174	1854	71	3.26811
982	123.34	135.84	135.94	4.82981	4.8423	1739	58	3.2403
982	123.36	135.86	135.96	4.83015	4.84267	1765	30	3.24674
982	123.38	135.88	135.98	4.83049	4.84304	1747	96	3.24229
982	123.39	135.89	135.99	4.83066	4.84323	1705	70	3.23172
982	123.42	135.92	136.02	4.83117	4.84379	1897	65	3.27807
982	123.44	135.94	136.04	4.83151	4.84416	1808	70	3.2572
982	123.47	135.97	136.07	4.83202	4.84472	1872	50	3.27231
982	123.48	135.98	136.08	4.83219	4.84491	1898	104	3.2783
982	123.53	136.03	136.13	4.83304	4.84584	2088	69	3.31973
982	123.54	136.04	136.14	4.83321	4.84602	1963	76	3.29292
982	123.56	136.06	136.16	4.83355	4.8464	1990	15	3.29885
982	123.58	136.08	136.18	4.83389	4.84677	1855	84	3.26834
982	123.59	136.09	136.19	4.83406	4.84695	1957	46	3.29159
982	123.62	136.12	136.22	4.83457	4.84751	2015	65	3.30428
982	123.65	136.15	136.25	4.83508	4.84807	1991	63	3.29907
982	123.66	136.16	136.26	4.83525	4.84826	1906	75	3.28012
982	123.68	136.18	136.28	4.83559	4.84863	1973	58	3.29513
982	123.7	136.2	136.3	4.83593	4.849	1693	62	3.22866
982	123.73	136.23	136.33	4.83644	4.84956	2127	31	3.32777
982	123.74	136.24	136.34	4.83661	4.84975	1902	85	3.27921
982	123.78	136.28	136.38	4.83729	4.85049	1989	36	3.29863
982	123.8	136.3	136.4	4.83763	4.85086	2015	41	3.30428
982	123.82	136.32	136.42	4.83797	4.85124	2018	44	3.30492
982	123.85	136.35	136.45	4.83849	4.85179	2222	53	3.34674
982	123.86	136.36	136.46	4.83866	4.85198	2200	106	3.34242
982	123.88	136.38	136.48	4.839	4.85235	2097	61	3.3216
982	123.89	136.39	136.49	4.83917	4.85254	2324	146	3.36624
982	123.93	136.43	136.53	4.83985	4.85328	2252	53	3.35257
982	123.94	136.44	136.54	4.84002	4.85347	2311	112	3.3638
982	123.96	136.46	136.56	4.84036	4.85384	2497	105	3.39742
982	123.98	136.48	136.58	4.8407	4.85422	2177	11	3.33786
982	123.99	136.49	136.59	4.84087	4.8544	2197	77	3.34183
982	124.02	136.52	136.62	4.84138	4.85496	2221	62	3.34655
982	124.03	136.53	136.63	4.84155	4.85515	2056	24	3.31302
982	124.07	136.57	136.67	4.84223	4.85589	2263	44	3.35468
982	124.08	136.58	136.68	4.8424	4.85608	2280	88	3.35793
982	124.1	136.6	136.7	4.84274	4.85645	2227	53	3.34772
982	124.12	136.62	136.72	4.84308	4.85682	2038	49	3.3092
982	124.14	136.64	136.74	4.84342	4.85719	2252	105	3.35257
982	124.18	136.68	136.78	4.8441	4.85794	1601	57	3.20439
982	124.2	136.7	136.8	4.84444	4.85831	2120	95	3.32634
982	124.21	136.71	136.81	4.84461	4.8585	1916	55	3.2824
982	124.24	136.74	136.84	4.84512	4.85906	2072	130	3.31639
982	124.28	136.78	136.88	4.8458	4.8598	2255	74	3.35315
982	124.35	136.85	136.95	4.84699	4.8611	2069	39	3.31576
982	124.36	136.86	136.96	4.84716	4.86129	1773	53	3.24871
982	124.38	136.88	136.98	4.8475	4.86166	1579	79	3.19838
982	124.4	136.9	137	4.84784	4.86204	1540	99	3.18752
982	124.41	136.91	137.01	4.84801	4.86222	1728	52	3.23754
982	124.42	136.92	137.02	4.84818	4.86241	1699	93	3.23019
982	124.43	136.93	137.03	4.84835	4.86259	1783	92	3.25115
982	124.46	136.96	137.06	4.84886	4.86315	1658	69	3.21958
982	124.5	137	137.1	4.84954	4.8639	1800	96	3.25527
982	124.51	137.01	137.11	4.84971	4.86408	1628	50	3.21165
982	124.52	137.02	137.12	4.84988	4.86427	1653	72	3.21827
982	124.56	137.06	137.16	4.85056	4.86501	1708	76	3.23249
982	124.58	137.08	137.18	4.8509	4.86539	1314	94	3.1186
982	124.61	137.11	137.21	4.85141	4.86595	1634	70	3.21325
982	124.62	137.12	137.22	4.85158	4.86613	1609	53	3.20656
982	124.64	137.14	137.24	4.85192	4.8665	1610	52	3.20683
982	124.65	137.15	137.25	4.85209	4.86669	1460	54	3.16435
982	124.68	137.18	137.28	4.8526	4.86725	1388	25	3.14239
982	124.73	137.23	137.33	4.85345	4.86818	1682	50	3.22583
982	124.74	137.24	137.34	4.85362	4.86837	1647	105	3.21669
982	124.75	137.25	137.35	4.85379	4.86855	1504	50	3.17725
982	124.78	137.28	137.38	4.8543	4.86911	1911	93	3.28126
982	124.81	137.31	137.41	4.85481	4.86967	1695	59	3.22917
982	124.82	137.32	137.42	4.85498	4.86986	1732	66	3.23855
982	124.84	137.34	137.44	4.85532	4.87023	1747	113	3.24229
982	124.86	137.36	137.46	4.85566	4.8706	1980	63	3.29667
982	124.88	137.38	137.48	4.856	4.87097	1801	64	3.25551
982	124.91	137.41	137.51	4.85651	4.87153	1704	64	3.23147
982	124.92	137.42	137.52	4.85668	4.87172	1653	79	3.21827
982	124.95	137.45	137.55	4.85719	4.87228	1629	90	3.21192
982	124.96	137.46	137.56	4.85736	4.87246	1735	100	3.2393
982	124.99	137.49	137.59	4.85787	4.87302	1511	90	3.17926
982	125	137.5	137.6	4.85804	4.87321	1486	89	3.17202
982	125.02	137.52	137.62	4.85838	4.87358	1526	49	3.18355
982	125.03	137.53	137.63	4.85855	4.87377	1569	106	3.19562
982	125.06	137.56	137.66	4.85906	4.87432	1702	70	3.23096
982	125.08	137.58	137.68	4.8594	4.8747	1636	68	3.21378
982	125.13	137.63	137.73	4.86026	4.87563	1613	58	3.20763
982	125.18	137.68	137.78	4.86111	4.87636	1596	102	3.20303
982	125.19	137.69	137.79	4.86128	4.87648	1868	54	3.27138
982	125.22	137.72	137.82	4.86179	4.87685	1723	75	3.23629
982	125.25	137.75	137.85	4.8623	4.87721	1685	68	3.2266
982	125.26	137.76	137.86	4.86247	4.87733	1798	99	3.25479
982	125.27	137.77	137.87	4.86264	4.87745	1994	64	3.29973
982	125.3	137.8	137.9	4.86315	4.87782	2118	100	3.32593
982	125.32	137.82	137.92	4.86349	4.87806	2017	106	3.30471
982	125.35	137.85	137.95	4.864	4.87842	1997	98	3.30038
982	125.36	137.86	137.96	4.86417	4.87854	2212	80	3.34479
982	125.39	137.89	137.99	4.86468	4.8789	2007	52	3.30255
982	125.41	137.91	138.01	4.86502	4.87915	2001	91	3.30125
982	125.42	137.92	138.02	4.86519	4.87927	1657	72	3.21932
982	125.44	137.94	138.04	4.86553	4.87951	1543	27	3.18837
982	125.46	137.96	138.06	4.86587	4.87975	1368	96	3.13609
982	125.55	138.05	138.15	4.8674	4.88084	1788	30	3.25237
982	125.56	138.06	138.16	4.86757	4.88096	1668	90	3.2222
982	125.61	138.11	138.21	4.86842	4.88157	1796	105	3.25431
982	125.62	138.12	138.22	4.86859	4.88169	1774	39	3.24895
982	125.63	138.13	138.23	4.86876	4.88181	1682	100	3.22583
982	125.66	138.16	138.26	4.86927	4.88217	1794	104	3.25382
982	125.69	138.19	138.29	4.86978	4.88254	1668	67	3.2222
982	125.7	138.2	138.3	4.86995	4.88266	1528	54	3.18412
982	125.72	138.22	138.32	4.87029	4.8829	1668	41	3.2222
982	125.73	138.23	138.33	4.87046	4.88302	1709	50	3.23274
982	125.75	138.25	138.35	4.8708	4.88326	1958	99	3.29181
982	125.77	138.27	138.37	4.87114	4.8835	1711	37	3.23325
982	125.8	138.3	138.4	4.87165	4.88387	1641	49	3.21511
982	125.81	138.31	138.41	4.87182	4.88399	1847	27	3.26647
982	125.84	138.34	138.44	4.87233	4.88435	1525	-1	3.18327
982	125.88	138.38	138.48	4.87301	4.88483	1688	31	3.22737
982	125.93	138.43	138.53	4.87386	4.88544	1727	57	3.23729
982	125.94	138.44	138.54	4.87403	4.88556	1578	135	3.19811
982	125.97	138.47	138.57	4.87454	4.88592	1618	30	3.20898
982	125.99	138.49	138.59	4.87488	4.88617	1690	127	3.22789
982	126.01	138.51	138.61	4.87522	4.88641	1630	48	3.21219
982	126.02	138.52	138.62	4.87539	4.88653	1473	81	3.1682
982	126.03	138.53	138.63	4.87556	4.88665	1477	17	3.16938
982	126.06	138.56	138.66	4.87607	4.88701	1439	98	3.15806
982	126.08	138.58	138.68	4.87641	4.88725	1375	20	3.1383
982	126.11	138.61	138.71	4.87692	4.88762	1593	6	3.20222
982	126.12	138.62	138.72	4.87709	4.88774	1835	79	3.26364
982	126.14	138.64	138.74	4.87743	4.88798	1581	85	3.19893
982	126.15	138.65	138.75	4.8776	4.8881	1681	55	3.22557
982	126.16	138.66	138.76	4.87777	4.88822	1772	58	3.24846
982	126.18	138.68	138.78	4.87811	4.88846	1908	55	3.28058
982	126.21	138.71	138.81	4.87862	4.88883	2052	85	3.31218
982	126.22	138.72	138.82	4.87879	4.88895	2141	101	3.33062
982	126.23	138.73	138.83	4.87896	4.88907	1928	79	3.28511
982	126.26	138.76	138.86	4.87947	4.88943	1983	61	3.29732
982	126.27	138.77	138.87	4.87964	4.88955	1889	62	3.27623
982	126.29	138.79	138.89	4.87998	4.8898	2212	21	3.34479
982	126.34	138.84	138.94	4.88083	4.8904	2515	79	3.40054
982	126.36	138.86	138.96	4.88117	4.89064	2678	59	3.42781
982	126.39	138.89	138.99	4.88169	4.89101	3048	7	3.48401
982	126.4	138.9	139	4.88186	4.89113	2444	13	3.3881
982	126.42	138.92	139.02	4.8822	4.89137	2309	58	3.36342
982	126.43	138.93	139.03	4.88237	4.89149	2246	75	3.35141
982	126.48	138.98	139.08	4.88322	4.8921	2122	150	3.32675
982	126.5	139	139.1	4.88356	4.89234	2201	86	3.34262
982	126.52	139.02	139.12	4.8839	4.89258	2137	89	3.3298
982	126.55	139.05	139.15	4.88441	4.89294	2200	92	3.34242
982	126.57	139.07	139.17	4.88475	4.89318	2071	92	3.31618
982	126.58	139.08	139.18	4.88492	4.89331	2116	79	3.32552
982	126.61	139.11	139.21	4.88543	4.89367	2189	53	3.34025
982	126.62	139.12	139.22	4.8856	4.89379	2060	92	3.31387
982	126.64	139.14	139.24	4.88594	4.89403	2150	73	3.33244
982	126.66	139.16	139.26	4.88628	4.89427	2183	99	3.33905
982	126.69	139.19	139.29	4.88679	4.89464	2105	69	3.32325
982	126.74	139.24	139.34	4.88764	4.89524	2324	2	3.36624
982	126.76	139.26	139.36	4.88798	4.89548	2382	51	3.37694
982	126.78	139.28	139.38	4.88832	4.89573	2565	111	3.40909
982	126.79	139.29	139.39	4.88849	4.89585	2745	101	3.43854
982	126.8	139.3	139.4	4.88866	4.89597	2728	67	3.43584
982	126.81	139.31	139.41	4.88883	4.89609	3093	57	3.49038
982	126.84	139.34	139.44	4.88934	4.89645	2834	101	3.4524
982	126.86	139.36	139.46	4.88968	4.89669	3271	58	3.51468
982	126.89	139.39	139.49	4.89019	4.89706	3011	72	3.47871
982	126.9	139.4	139.5	4.89036	4.89718	2958	56	3.471
982	126.93	139.43	139.53	4.89087	4.89754	3287	65	3.5168
982	126.94	139.44	139.54	4.89104	4.89766	3114	109	3.49332
982	126.98	139.48	139.58	4.89172	4.89815	3090	109	3.48996
982	126.99	139.49	139.59	4.89189	4.89827	3257	81	3.51282
982	127.02	139.52	139.62	4.8924	4.89863	2903	61	3.46285
982	127.03	139.53	139.63	4.89257	4.89875	3324	80	3.52166
982	127.06	139.56	139.66	4.89308	4.89911	2976	77	3.47363
982	127.08	139.58	139.68	4.89342	4.89936	3146	82	3.49776
982	127.09	139.59	139.69	4.89359	4.89948	3099	143	3.49122
982	127.14	139.64	139.74	4.89444	4.90008	2985	80	3.47494
982	127.15	139.65	139.75	4.89461	4.9002	2742	100	3.43807
982	127.18	139.68	139.78	4.89512	4.90057	3083	58	3.48897
982	127.19	139.69	139.79	4.89529	4.90069	2920	123	3.46538
982	127.22	139.72	139.82	4.8958	4.90105	2800	107	3.44716
982	127.26	139.76	139.86	4.89648	4.90154	2510	30	3.39967
982	127.27	139.77	139.87	4.89665	4.90166	2621	22	3.41847
982	127.3	139.8	139.9	4.89716	4.90202	2792	77	3.44592
982	127.32	139.82	139.92	4.8975	4.90226	2501	63	3.39811
982	127.33	139.83	139.93	4.89767	4.90238	2586	93	3.41263
982	127.38	139.88	139.98	4.89852	4.90299	2440	97	3.38739
982	127.39	139.89	139.99	4.89869	4.90311	2522	83	3.40175
982	127.42	139.92	140.02	4.8992	4.90347	2418	97	3.38346
982	127.43	139.93	140.03	4.89937	4.90359	2605	67	3.41581
982	127.46	139.96	140.06	4.89988	4.90396	2410	112	3.38202
982	127.48	139.98	140.08	4.90022	4.9042	2488	77	3.39585
982	127.53	140.03	140.13	4.90107	4.9048	2195	19	3.34143
982	127.54	140.04	140.14	4.90124	4.90492	2453	78	3.3897
982	127.55	140.05	140.15	4.90141	4.90504	2185	54	3.33945
982	127.56	140.06	140.16	4.90158	4.90517	2302	80	3.36211
982	127.58	140.08	140.18	4.90192	4.90541	2332	101	3.36773
982	127.6	140.1	140.2	4.90226	4.90565	1845	42	3.266
982	127.62	140.12	140.22	4.9026	4.90589	1844	79	3.26576
982	127.64	140.14	140.24	4.90294	4.90613	1939	81	3.28758
982	127.67	140.17	140.27	4.90346	4.9065	2059	81	3.31366
982	127.7	140.2	140.3	4.90397	4.90686	2055	33	3.31281
982	127.73	140.23	140.33	4.90448	4.90722	2118	87	3.32593
982	127.76	140.26	140.36	4.90499	4.90759	1574	62	3.197
982	127.78	140.28	140.38	4.90533	4.90783	2000	56	3.30103
982	127.8	140.3	140.4	4.90567	4.90807	1462	61	3.16495
982	127.82	140.32	140.42	4.90601	4.90831	1515	78	3.18041
982	127.84	140.34	140.44	4.90635	4.90855	1464	7	3.16554
982	127.86	140.36	140.46	4.90669	4.9088	1384	88	3.14114
982	127.87	140.37	140.47	4.90686	4.90892	1579	85	3.19838
982	127.89	140.39	140.49	4.9072	4.90916	1588	101	3.20085
982	127.94	140.44	140.54	4.90805	4.90976	1683	70	3.22608
982	127.96	140.46	140.56	4.90839	4.91001	1573	64	3.19673
982	127.98	140.48	140.58	4.90873	4.91025	1523	105	3.1827
982	128	140.5	140.6	4.90907	4.91049	1462	44	3.16495
982	128.02	140.52	140.62	4.90941	4.91073	1663	31	3.22089
982	128.04	140.54	140.64	4.90975	4.91097	1371	110	3.13704
982	128.05	140.55	140.65	4.90992	4.9111	1626	77	3.21112
982	128.08	140.58	140.68	4.91043	4.91146	2005	68	3.30211
982	128.12	140.62	140.72	4.91111	4.91194	1837	76	3.26411
982	128.14	140.64	140.74	4.91145	4.91218	1682	104	3.22583
982	128.16	140.66	140.76	4.91179	4.91243	2007	50	3.30255
982	128.18	140.68	140.78	4.91213	4.91267	1925	83	3.28443
982	128.19	140.69	140.79	4.9123	4.91279	2003	112	3.30168
982	128.22	140.72	140.82	4.91281	4.91315	1732	125	3.23855
982	128.24	140.74	140.84	4.91315	4.91339	1932	145	3.28601
982	128.25	140.75	140.85	4.91332	4.91352	2191	103	3.34064
982	128.26	140.76	140.86	4.91349	4.91364	2221	110	3.34655
982	128.28	140.78	140.88	4.91383	4.91388	2523	126	3.40192
982	128.31	140.81	140.91	4.91433	4.9143	2416	217	3.3831
982	128.36	140.86	140.96	4.91517	4.91505	2497	110	3.39742
982	128.39	140.89	140.99	4.91567	4.9155	2363	124	3.37346
982	128.4	140.9	141	4.91584	4.91565	2580	160	3.41162
982	128.42	140.92	141.02	4.91618	4.91595	2549	101	3.40637
982	128.44	140.94	141.04	4.91651	4.91626	2855	93	3.45561
982	128.45	140.95	141.05	4.91668	4.91641	2853	87	3.4553
982	128.46	140.96	141.06	4.91685	4.91656	2705	77	3.43217
982	128.48	140.98	141.08	4.91718	4.91686	2785	191	3.44483
982	128.5	141	141.1	4.91752	4.91716	2957	206	3.47085
982	128.52	141.02	141.12	4.91785	4.91746	3287	122	3.5168
982	128.55	141.05	141.15	4.91835	4.91791	2548	82	3.4062
982	128.56	141.06	141.16	4.91852	4.91806	2958	182	3.471
982	128.58	141.08	141.18	4.91886	4.91836	3206	148	3.50596
982	128.6	141.1	141.2	4.91919	4.91866	2902	142	3.4627
982	128.63	141.13	141.23	4.91969	4.91911	3520	179	3.54654
982	128.64	141.14	141.24	4.91986	4.91926	3732	191	3.57194
982	128.66	141.16	141.26	4.9202	4.91956	3810	147	3.58092
982	128.69	141.19	141.29	4.9207	4.92002	3614	172	3.55799
982	128.7	141.2	141.3	4.92087	4.92017	3752	226	3.57426
982	128.76	141.26	141.36	4.92187	4.92107	3821	212	3.58218
982	128.78	141.28	141.38	4.9222	4.92137	4152	255	3.61826
982	128.8	141.3	141.4	4.92254	4.92167	4269	172	3.63033
982	128.81	141.31	141.41	4.92271	4.92182	3789	183	3.57852
982	128.84	141.34	141.44	4.92321	4.92227	4839	268	3.68476
982	128.85	141.35	141.45	4.92338	4.92242	4736	230	3.67541
982	128.86	141.36	141.46	4.92354	4.92257	5300	232	3.72428
982	128.88	141.38	141.48	4.92388	4.92287	6038	297	3.78089
982	128.9	141.4	141.5	4.92421	4.92317	6158	101	3.78944
982	128.93	141.43	141.53	4.92472	4.92362	6908	96	3.83935
982	128.96	141.46	141.56	4.92522	4.92408	2855	93	3.9553
982	128.98	141.48	141.58	4.92555	4.92438	6020	91	3.7796
982	129.03	142.73	143.09	4.94648	4.94317	2337	91	3.36866
982	129.04	142.74	143.1	4.94665	4.94332	2437	85	3.38686
982	129.06	142.76	143.12	4.94699	4.94362	2422	83	3.38417
982	129.09	142.79	143.15	4.94749	4.94408	2163	113	3.33506
982	129.1	142.8	143.16	4.94766	4.94423	2822	76	3.45056
982	129.12	142.82	143.18	4.94799	4.94453	2658	24	3.42455
982	129.15	142.85	143.21	4.94849	4.94498	2525	87	3.40226
982	129.16	142.86	143.22	4.94866	4.94513	2463	96	3.39146
982	129.18	142.88	143.24	4.949	4.94543	2834	80	3.4524
982	129.2	142.9	143.26	4.94933	4.94573	2986	34	3.47509
982	129.22	142.92	143.28	4.94967	4.94603	2669	74	3.42635
982	129.24	142.94	143.3	4.95	4.94633	2777	79	3.44358
982	129.25	142.95	143.31	4.95017	4.94648	2902	48	3.4627
982	129.28	142.98	143.34	4.95067	4.94693	2503	64	3.39846
982	129.29	142.99	143.35	4.95084	4.94708	2761	50	3.44107
982	129.35	143.05	143.41	4.95184	4.94798	2658	72	3.42455
982	129.38	143.08	143.44	4.95234	4.94844	2891	-3	3.46105
982	129.39	143.09	143.45	4.95251	4.94859	2472	62	3.39305
982	129.4	143.1	143.46	4.95268	4.94874	2277	83	3.35736
982	129.42	143.12	143.48	4.95301	4.94904	2244	75	3.35102
982	129.43	143.13	143.49	4.95318	4.94919	2332	48	3.36773
982	129.46	143.16	143.52	4.95368	4.94964	2314	80	3.36436
982	129.48	143.18	143.54	4.95402	4.94994	2322	83	3.36586
982	129.5	143.2	143.56	4.95435	4.95024	2260	80	3.35411
982	129.52	143.22	143.58	4.95469	4.95054	2240	65	3.35025
982	129.54	143.24	143.6	4.95502	4.95084	2292	84	3.36021
982	129.56	143.26	143.62	4.95536	4.95114	2384	125	3.37731
982	129.59	143.29	143.65	4.95586	4.95159	2223	80	3.34694
982	129.6	143.3	143.66	4.95603	4.95174	2061	91	3.31408
982	129.61	143.31	143.67	4.9562	4.95189	1939	69	3.28758
982	129.64	143.34	143.7	4.9567	4.95235	2023	96	3.306
982	129.66	143.36	143.72	4.95703	4.95265	2159	91	3.33425
982	129.67	143.37	143.73	4.9572	4.9528	2068	60	3.31555
982	129.74	143.44	143.8	4.95837	4.95385	1907	67	3.28035
982	129.76	143.46	143.82	4.95871	4.95417	1591	46	3.20167
982	129.78	143.48	143.84	4.95904	4.95452	1809	44	3.25744
982	129.8	143.5	143.86	4.95938	4.95487	1596	55	3.20303
982	129.82	143.52	143.88	4.95971	4.95522	1707	115	3.23223
982	129.84	143.54	143.9	4.96005	4.95557	1541	78	3.1878
982	129.86	143.56	143.92	4.96038	4.95592	1559	31	3.19285
982	129.89	143.59	143.95	4.96088	4.95645	1645	116	3.21617
982	129.9	143.6	143.96	4.96105	4.95662	1537	86	3.18667
982	129.92	143.62	143.98	4.96139	4.95697	1758	90	3.24502
982	129.95	143.65	144.01	4.96189	4.9575	1635	79	3.21352
982	129.96	143.66	144.02	4.96206	4.95767	1662	25	3.22063
982	129.98	143.68	144.04	4.96239	4.95802	1701	44	3.2307
982	130	143.7	144.06	4.96273	4.95837	2031	61	3.30771
982	130.02	143.72	144.08	4.96306	4.95872	2019	75	3.30514
982	130.03	143.73	144.09	4.96323	4.9589	2145	105	3.33143
982	130.06	143.76	144.12	4.96373	4.95942	1910	95	3.28103
982	130.08	143.78	144.14	4.96407	4.95977	2342	139	3.36959
982	130.1	143.8	144.16	4.9644	4.96012	2356	100	3.37218
982	130.15	143.85	144.21	4.96524	4.961	2515	62	3.40054
982	130.16	143.86	144.22	4.96541	4.96117	2626	27	3.41929
982	130.18	143.88	144.24	4.96574	4.96152	2179	53	3.33826
982	130.2	143.9	144.26	4.96608	4.96187	2142	62	3.33082
982	130.21	143.91	144.27	4.96624	4.96205	2279	117	3.35774
982	130.22	143.92	144.28	4.96641	4.96222	2188	34	3.34005
982	130.25	143.95	144.31	4.96691	4.96275	1899	72	3.27852
982	130.26	143.96	144.32	4.96708	4.96292	1962	88	3.2927
982	130.29	143.99	144.35	4.96758	4.96345	1978	106	3.29623
982	130.3	144	144.36	4.96775	4.96362	1934	58	3.28646
982	130.32	144.02	144.38	4.96808	4.96397	2071	17	3.31618
982	130.34	144.04	144.4	4.96842	4.96432	1756	31	3.24452
982	130.37	144.07	144.43	4.96892	4.96485	1776	41	3.24944
982	130.38	144.08	144.44	4.96909	4.96502	1856	48	3.26858
982	130.4	144.1	144.46	4.96942	4.96537	1853	44	3.26788
982	130.42	144.12	144.48	4.96976	4.96572	1837	65	3.26411
982	130.43	144.13	144.49	4.96993	4.9659	1722	28	3.23603
982	130.46	144.16	144.52	4.97043	4.96642	1671	35	3.22298
982	130.48	144.18	144.54	4.97076	4.96677	1303	13	3.11494
982	130.49	144.19	144.55	4.97093	4.96695	1326	69	3.12254
982	130.56	144.26	144.62	4.9721	4.96817	1541	32	3.1878
982	130.57	144.27	144.63	4.97227	4.96835	1407	7	3.14829
982	130.59	144.29	144.65	4.97261	4.9687	1487	112	3.17231
982	130.6	144.3	144.66	4.97277	4.96887	1483	67	3.17114
982	130.63	144.33	144.69	4.97328	4.9694	1691	35	3.22814
982	130.64	144.34	144.7	4.97344	4.96957	1621	28	3.20978
982	130.66	144.36	144.72	4.97378	4.96992	1380	71	3.13988
982	130.68	144.38	144.74	4.97411	4.97027	1621	61	3.20978
982	130.7	144.4	144.76	4.97445	4.97062	1608	71	3.20629
982	130.72	144.42	144.78	4.97478	4.97097	1619	67	3.20925
982	130.74	144.44	144.8	4.97512	4.97132	1715	63	3.23426
982	130.75	144.45	144.81	4.97528	4.9715	1537	120	3.18667
982	130.77	144.47	144.83	4.97562	4.97185	1730	56	3.23805
982	130.78	144.48	144.84	4.97579	4.97202	1651	77	3.21775
982	130.79	144.49	144.85	4.97595	4.9722	1576	89	3.19756
982	130.81	144.51	144.87	4.97629	4.97255	1743	34	3.2413
982	130.84	144.54	144.9	4.97679	4.97307	1641	48	3.21511
982	130.87	144.57	144.93	4.97729	4.9736	1852	52	3.26764
982	130.89	144.59	144.95	4.97763	4.97395	1804	83	3.25624
982	130.95	144.65	145.01	4.97863	4.975	1773	40	3.24871
982	130.98	144.68	145.04	4.97914	4.97555	1847	-7	3.26647
982	131	144.7	145.06	4.97947	4.97592	1784	110	3.25139
982	131.01	144.71	145.07	4.97964	4.97611	1844	42	3.26576
982	131.04	144.74	145.1	4.98014	4.97666	2021	35	3.30557
982	131.05	144.75	145.11	4.98031	4.97685	1844	70	3.26576
982	131.08	144.78	145.14	4.98081	4.9774	1768	57	3.24748
982	131.11	144.81	145.17	4.98131	4.97795	1857	60	3.26881
982	131.12	144.82	145.18	4.98148	4.97814	1724	71	3.23654
982	131.13	144.83	145.19	4.98165	4.97832	1744	43	3.24155
982	131.16	144.86	145.22	4.98215	4.97888	1563	23	3.19396
982	131.19	144.89	145.25	4.98265	4.97943	1563	19	3.19396
982	131.2	144.9	145.26	4.98282	4.97962	1536	54	3.18639
982	131.22	144.92	145.28	4.98315	4.97998	1487	18	3.17231
982	131.24	144.94	145.3	4.98349	4.98035	1584	87	3.19976
982	131.26	144.96	145.32	4.98382	4.98072	1710	31	3.233
982	131.27	144.97	145.33	4.98399	4.98091	1525	52	3.18327
982	131.3	145	145.36	4.98449	4.98146	1441	122	3.15866
982	131.34	145.04	145.4	4.98516	4.9822	1450	87	3.16137
982	131.36	145.06	145.42	4.9855	4.98257	1573	106	3.19673
982	131.38	145.08	145.44	4.98583	4.98294	1410	30	3.14922
982	131.4	145.1	145.46	4.98617	4.98331	1589	71	3.20112
982	131.42	145.12	145.48	4.9865	4.98368	1490	51	3.17319
982	131.45	145.15	145.51	4.98701	4.98423	1645	69	3.21617
982	131.46	145.16	145.52	4.98717	4.98442	1631	6	3.21245
982	131.48	145.18	145.54	4.98751	4.98478	1441	91	3.15866
982	131.49	145.19	145.55	4.98768	4.98497	1421	59	3.15259
982	131.51	145.21	145.57	4.98801	4.98534	1480	65	3.17026
982	131.54	145.24	145.6	4.98851	4.98589	1388	49	3.14239
982	131.56	145.26	145.62	4.98885	4.98626	1419	65	3.15198
982	131.59	145.29	145.65	4.98935	4.98682	1567	80	3.19507
982	131.6	145.3	145.66	4.98952	4.987	1514	81	3.18013
982	131.62	145.32	145.68	4.98985	4.98737	1666	87	3.22167
982	131.64	145.34	145.7	4.99019	4.98774	1399	118	3.14582
982	131.67	145.37	145.73	4.99069	4.98829	1540	52	3.18752
982	131.68	145.38	145.74	4.99086	4.98848	1375	77	3.1383
982	131.69	145.39	145.75	4.99102	4.98866	1389	62	3.1427
982	131.74	145.44	145.8	4.99186	4.98958	1198	79	3.07846
982	131.76	145.46	145.82	4.9922	4.98995	1218	85	3.08565
982	131.78	145.48	145.84	4.99253	4.99032	1264	53	3.10175
982	131.8	145.5	145.86	4.99287	4.99069	1431	91	3.15564
982	131.81	145.51	145.87	4.99303	4.99088	1206	79	3.08135
982	131.82	145.52	145.88	4.9932	4.99106	1229	47	3.08955
982	131.85	145.55	145.91	4.9937	4.99162	1278	-3	3.10653
982	131.86	145.56	145.92	4.99387	4.9918	1344	62	3.1284
982	131.88	145.58	145.94	4.99421	4.99217	1316	64	3.11926
982	131.89	145.59	145.95	4.99437	4.99235	1451	49	3.16167
982	131.91	145.61	145.97	4.99471	4.99272	1352	23	3.13098
982	131.92	145.62	145.98	4.99488	4.99291	1308	34	3.11661
982	131.94	145.64	146	4.99521	4.99328	1291	60	3.11093
982	131.96	145.66	146.02	4.99555	4.99365	1246	61	3.09552
982	131.98	145.68	146.04	4.99588	4.99402	1259	84	3.10003
982	132	145.7	146.06	4.99622	4.99438	1308	54	3.11661
982	132.02	145.72	146.08	4.99655	4.99475	1443	42	3.15927
982	132.05	145.75	146.11	4.99705	4.99531	1338	111	3.12646
982	132.06	145.76	146.12	4.99722	4.99549	1360	55	3.13354
982	132.07	145.77	146.13	4.99739	4.99568	1122	81	3.04999
982	132.13	145.83	146.19	4.99839	4.99678	1402	54	3.14675
982	132.15	145.85	146.21	4.99873	4.99715	1268	68	3.10312
982	132.16	145.86	146.22	4.99889	4.99734	1446	82	3.16017
982	132.18	145.88	146.24	4.99923	4.99771	1266	116	3.10243
982	132.21	145.91	146.27	4.99973	4.99826	1520	65	3.18184
982	132.22	145.92	146.28	4.9999	4.99845	1424	64	3.15351
982	132.23	145.93	146.29	5.00007	4.99863	1301	65	3.11428
982	132.26	145.96	146.32	5.00057	4.99914	1535	67	3.18611
982	132.29	145.99	146.35	5.00107	4.99955	1192	28	3.07628
982	132.3	146	146.36	5.00124	4.99969	1460	72	3.16435
982	132.32	146.02	146.38	5.00157	4.99996	1567	82	3.19507
982	132.33	146.03	146.39	5.00174	5.0001	1478	51	3.16967
982	132.36	146.06	146.42	5.00224	5.00051	1513	59	3.17984
982	132.39	146.09	146.45	5.00275	5.00092	1531	42	3.18498
982	132.4	146.1	146.46	5.00291	5.00106	1482	56	3.17085
982	132.42	146.12	146.48	5.00325	5.00133	1557	52	3.19229
982	132.45	146.15	146.51	5.00375	5.00174	1430	51	3.15534
982	132.47	146.17	146.53	5.00409	5.00201	1548	75	3.18977
982	132.48	146.18	146.54	5.00425	5.00215	1444	98	3.15957
982	132.49	146.19	146.55	5.00442	5.00229	1641	101	3.21511
982	132.55	146.25	146.61	5.00542	5.00311	1714	90	3.23401
982	132.56	146.26	146.62	5.00559	5.00325	1663	56	3.22089
982	132.58	146.28	146.64	5.00593	5.00352	1633	77	3.21299
982	132.61	146.31	146.67	5.00643	5.00393	1675	150	3.22401
982	132.62	146.32	146.68	5.0066	5.00407	1699	106	3.23019
982	132.65	146.35	146.71	5.0071	5.00448	1830	43	3.26245
982	132.66	146.36	146.72	5.00727	5.00462	1808	104	3.2572
982	132.67	146.37	146.73	5.00743	5.00476	1866	91	3.27091
982	132.72	146.42	146.78	5.00827	5.00544	1570	98	3.1959
982	132.74	146.44	146.8	5.00861	5.00571	1514	51	3.18013
982	132.77	146.47	146.83	5.00911	5.00613	1625	49	3.21085
982	132.78	146.48	146.84	5.00928	5.00626	1681	122	3.22557
982	132.79	146.49	146.85	5.00944	5.0064	1664	56	3.22115
982	132.82	146.52	146.88	5.00995	5.00681	1725	86	3.23679
982	132.83	146.53	146.89	5.01011	5.00695	1634	61	3.21325
982	132.86	146.56	146.92	5.01062	5.00736	1641	87	3.21511
982	132.87	146.57	146.93	5.01078	5.0075	1672	87	3.22324
982	132.89	146.59	146.95	5.01112	5.00777	1727	65	3.23729
982	132.94	146.64	147	5.01196	5.00846	1841	117	3.26505
982	132.97	146.67	147.03	5.01246	5.00887	1584	109	3.19976
982	132.98	146.68	147.04	5.01262	5.009	1955	50	3.29115
982	133	146.7	147.06	5.01296	5.00928	1985	122	3.29776
982	133.02	146.72	147.08	5.01329	5.00955	2247	117	3.3516
982	133.03	146.73	147.09	5.01346	5.00969	2162	96	3.33486
982	133.06	146.76	147.12	5.01396	5.0101	2819	140	3.4501
982	133.09	146.79	147.15	5.01447	5.01051	3411	161	3.53288
982	133.1	146.8	147.16	5.01463	5.01065	3501	138	3.54419
982	133.12	146.82	147.18	5.01497	5.01092	4120	234	3.6149
982	133.14	146.84	147.2	5.0153	5.0112	4590	158	3.66181
982	133.17	146.87	147.23	5.01581	5.01161	5679	286	3.75427
982	133.18	146.88	147.24	5.01597	5.01174	5802	259	3.76358
982	133.19	146.89	147.25	5.01614	5.01188	5048	273	3.70312
982	133.22	146.92	147.28	5.01664	5.01229	6872	96	3.83708
982	133.23	146.93	147.29	5.01681	5.01243	2186	98	3.33965
982	133.24	146.94	147.3	5.01698	5.01257	2199	96	3.34223
982	133.26	146.96	147.32	5.01731	5.01284	2199	99	3.34223
982	133.27	146.97	147.33	5.01748	5.01298	2199	99	3.34223
982	133.28	146.98	147.34	5.01765	5.01311	2199	96	3.34223
982	133.29	146.99	147.35	5.01782	5.01325	2199	96	3.34223
982	133.34	147.04	147.4	5.01865	5.01394	2771	76	3.44264
982	133.35	147.05	147.41	5.01882	5.01407	2310	108	3.36361
982	133.38	147.08	147.44	5.01932	5.01449	2357	76	3.37236
982	133.39	147.09	147.45	5.01949	5.01462	2252	-20	3.35257
982	133.42	147.12	147.48	5.01999	5.01503	2146	71	3.33163
982	133.44	147.14	147.5	5.02033	5.01531	2026	79	3.30664
982	133.46	147.16	147.52	5.02066	5.01558	2104	41	3.32305
982	133.48	147.18	147.54	5.021	5.01586	2021	86	3.30557
982	133.52	147.22	147.58	5.02167	5.0164	2373	106	3.3753
982	133.54	147.24	147.6	5.022	5.01668	2186	76	3.33965
982	133.57	147.27	147.63	5.0225	5.01709	2199	76	3.34223
982	133.58	147.28	147.64	5.02267	5.01723	2082	78	3.31848
982	133.6	147.3	147.66	5.02301	5.0175	2089	86	3.31994
982	133.62	147.32	147.68	5.02334	5.01777	1944	48	3.2887
982	133.63	147.33	147.69	5.02351	5.01791	2168	39	3.33606
982	133.65	147.35	147.71	5.02384	5.01819	2415	105	3.38292
982	133.68	147.38	147.74	5.02435	5.0186	2516	67	3.40071
982	133.77	147.47	147.83	5.02585	5.01983	2229	100	3.34811
982	133.78	147.48	147.84	5.02602	5.01997	2139	60	3.33021
982	133.8	147.5	147.86	5.02636	5.02024	2155	99	3.33345
982	133.82	147.52	147.88	5.02669	5.02051	2209	71	3.3442
982	133.83	147.53	147.89	5.02686	5.02065	2122	101	3.32675
982	133.86	147.56	147.92	5.02736	5.02106	1817	63	3.25935
982	133.89	147.59	147.95	5.02786	5.02147	1920	10	3.2833
982	133.9	147.6	147.96	5.02803	5.02161	1717	77	3.23477
982	133.91	147.61	147.97	5.0282	5.02175	1589	65	3.20112
982	133.94	147.64	148	5.0287	5.02216	1406	73	3.14799
982	133.95	147.65	148.01	5.02887	5.0223	1469	65	3.16702
982	133.98	147.68	148.04	5.02937	5.02271	1699	92	3.23019
982	134	147.7	148.06	5.0297	5.02298	1621	68	3.20978
982	134.02	147.72	148.08	5.03004	5.02326	1444	38	3.15957
982	134.05	147.75	148.11	5.03054	5.02367	1458	52	3.16376
982	134.08	147.78	148.14	5.03104	5.02408	1571	74	3.19618
982	134.13	147.83	148.19	5.03188	5.02476	1570	43	3.1959
982	134.15	147.85	148.21	5.03222	5.02504	1498	54	3.17551
982	134.18	147.88	148.24	5.03272	5.02545	1665	71	3.22141
982	134.2	147.9	148.26	5.03305	5.02572	1688	79	3.22737
982	134.22	147.92	148.28	5.03339	5.026	1396	104	3.14489
982	134.25	147.95	148.31	5.03389	5.02641	1534	118	3.18583
982	134.27	147.97	148.33	5.03423	5.02668	1535	72	3.18611
982	134.29	147.99	148.35	5.03456	5.02696	1528	51	3.18412
982	134.3	148	148.36	5.03473	5.02709	1528	68	3.18412
982	134.31	148.01	148.37	5.03489	5.02723	1721	81	3.23578
982	134.34	148.04	148.4	5.0354	5.02764	1646	45	3.21643
982	134.35	148.05	148.41	5.03556	5.02778	1533	115	3.18554
982	134.38	148.08	148.44	5.03607	5.02819	1620	49	3.20952
982	134.4	148.1	148.46	5.0364	5.02846	1856	97	3.26858
982	134.42	148.12	148.48	5.03674	5.02874	1602	88	3.20466
982	134.43	148.13	148.49	5.0369	5.02887	1370	81	3.13672
982	134.46	148.16	148.52	5.03741	5.02929	1541	88	3.1878
982	134.47	148.17	148.53	5.03757	5.02942	1766	50	3.24699
982	134.54	148.24	148.6	5.03875	5.03038	1440	69	3.15836
982	134.55	148.25	148.61	5.03891	5.03052	1455	80	3.16286
982	134.58	148.28	148.64	5.03942	5.03093	1594	61	3.20249
982	134.6	148.3	148.66	5.03975	5.0312	1474	63	3.1685
982	134.61	148.31	148.67	5.03992	5.03134	1379	39	3.13956
982	134.65	148.35	148.71	5.04059	5.03189	1631	113	3.21245
982	134.66	148.36	148.72	5.04076	5.03203	1705	99	3.23172
982	134.68	148.38	148.74	5.04109	5.0323	1470	55	3.16732
982	134.7	148.4	148.76	5.04143	5.03257	1380	75	3.13988
982	134.73	148.43	148.79	5.04193	5.03299	1550	80	3.19033
982	134.74	148.44	148.8	5.0421	5.03312	1421	104	3.15259
982	134.77	148.47	148.83	5.0426	5.03353	1492	83	3.17377
982	134.78	148.48	148.84	5.04276	5.03367	1472	73	3.16791
982	134.8	148.5	148.86	5.0431	5.03394	1430	84	3.15534
982	134.82	148.52	148.88	5.04343	5.03422	1393	54	3.14395
982	134.83	148.53	148.89	5.0436	5.03436	1560	40	3.19312
982	134.86	148.56	148.92	5.0441	5.03477	1624	79	3.21059
982	134.88	148.58	148.94	5.04444	5.03504	1416	53	3.15106
982	134.93	148.63	148.99	5.04528	5.03573	1482	34	3.17085
982	134.94	148.64	149	5.04544	5.03586	1542	33	3.18808
982	134.96	148.66	149.02	5.04578	5.03613	1600	44	3.20412
982	134.98	148.68	149.04	5.04611	5.03639	1655	49	3.2188
982	134.99	148.69	149.05	5.04628	5.03652	1456	73	3.16316
982	135.02	148.72	149.08	5.04678	5.03691	1631	42	3.21245
982	135.03	148.73	149.09	5.04695	5.03704	1678	61	3.22479
982	135.09	148.79	149.15	5.04796	5.03782	1515	30	3.18041
982	135.1	148.8	149.16	5.04812	5.03795	1550	36	3.19033
982	135.13	148.83	149.19	5.04863	5.03834	1685	91	3.2266
982	135.14	148.84	149.2	5.04879	5.03847	1339	74	3.12678
982	135.19	148.89	149.25	5.04963	5.03912	1736	38	3.23955
982	135.2	148.9	149.26	5.0498	5.03924	1818	66	3.25959
982	135.21	148.91	149.27	5.04996	5.03937	1647	61	3.21669
982	135.24	148.94	149.3	5.05047	5.03976	1358	19	3.1329
982	135.28	148.98	149.34	5.05114	5.04028	1183	70	3.07298
982	135.31	149.01	149.37	5.05164	5.04067	1318	27	3.11992
982	135.33	149.03	149.39	5.05197	5.04093	1523	70	3.1827
982	135.37	149.07	149.43	5.05264	5.04145	1647	43	3.21669
982	135.38	149.08	149.44	5.05281	5.04158	1677	65	3.22453
982	135.39	149.09	149.45	5.05298	5.04171	1729	34	3.23779
982	135.42	149.12	149.48	5.05348	5.0421	1693	95	3.22866
982	135.47	149.17	149.53	5.05432	5.04275	1836	102	3.26387
982	135.48	149.18	149.54	5.05449	5.04288	1474	78	3.1685
982	135.49	149.19	149.55	5.05465	5.04301	1630	101	3.21219
982	135.52	149.22	149.58	5.05516	5.0434	1648	108	3.21696
982	135.53	149.23	149.59	5.05532	5.04353	1649	56	3.21722
982	135.56	149.26	149.62	5.05583	5.04392	1682	124	3.22583
982	135.58	149.28	149.64	5.05616	5.04418	1776	100	3.24944
982	135.61	149.31	149.67	5.05666	5.04457	1624	47	3.21059
982	135.62	149.32	149.68	5.05683	5.0447	1785	37	3.25164
982	135.65	149.35	149.71	5.05733	5.04509	1933	77	3.28623
982	135.66	149.36	149.72	5.0575	5.04522	1812	59	3.25816
982	135.68	149.38	149.74	5.05783	5.04547	1837	71	3.26411
982	135.69	149.39	149.75	5.058	5.0456	1756	30	3.24452
982	135.7	149.4	149.76	5.05817	5.04573	1702	40	3.23096
982	135.73	149.43	149.79	5.05867	5.04612	1733	98	3.2388
982	135.74	149.44	149.8	5.05884	5.04625	2027	53	3.30685
982	135.77	149.47	149.83	5.05934	5.04664	2009	65	3.30298
982	135.78	149.48	149.84	5.05951	5.04677	1871	98	3.27207
982	135.8	149.5	149.86	5.05984	5.04703	1769	79	3.24773
982	135.82	149.52	149.88	5.06018	5.04729	2111	72	3.32449
982	135.84	149.54	149.9	5.06051	5.04755	1749	55	3.24279
982	135.85	149.55	149.91	5.06068	5.04768	1684	66	3.22634
982	135.88	149.58	149.94	5.06118	5.04807	2253	65	3.35276
982	135.9	149.6	149.96	5.06152	5.04833	2098	53	3.32181
982	135.92	149.62	149.98	5.06185	5.04859	1916	66	3.2824
982	135.95	149.65	150.01	5.06236	5.04898	1847	62	3.26647
982	135.96	149.66	150.02	5.06252	5.04911	1729	51	3.23779
982	135.98	149.68	150.04	5.06286	5.04937	1708	54	3.23249
982	135.99	149.69	150.05	5.06303	5.0495	1762	3	3.24601
982	136.02	149.72	150.08	5.06353	5.04989	1606	60	3.20575
982	136.03	149.73	150.09	5.0637	5.05002	1558	39	3.19257
982	136.06	149.76	150.12	5.0642	5.05041	1615	87	3.20817
982	136.08	149.78	150.14	5.06453	5.05067	1443	90	3.15927
982	136.09	149.79	150.15	5.0647	5.0508	1697	62	3.22968
982	136.12	149.82	150.18	5.0652	5.05119	1618	-7	3.20898
982	136.15	149.85	150.21	5.0657	5.05158	1544	69	3.18865
982	136.18	149.88	150.24	5.06621	5.05196	1797	69	3.25455
982	136.2	149.9	150.26	5.06654	5.05222	1732	84	3.23855
982	136.21	149.91	150.27	5.06671	5.05235	1725	30	3.23679
982	136.24	149.94	150.3	5.06721	5.05274	1964	103	3.29314
982	136.25	149.95	150.31	5.06738	5.05287	1977	50	3.29601
982	136.28	149.98	150.34	5.06788	5.05326	2062	73	3.31429
982	136.29	149.99	150.35	5.06805	5.05339	1825	102	3.26126
982	136.32	150.02	150.38	5.06855	5.05378	2074	90	3.31681
982	136.33	150.03	150.39	5.06872	5.05391	2099	111	3.32201
982	136.36	150.06	150.42	5.06922	5.0543	1884	39	3.27508
982	136.37	150.07	150.43	5.06939	5.05443	2177	56	3.33786
982	136.39	150.09	150.45	5.06972	5.05469	2257	90	3.35353
982	136.4	150.1	150.46	5.06989	5.05482	2442	48	3.38775
982	136.43	150.13	150.49	5.07039	5.05521	2631	26	3.42012
982	136.44	150.14	150.5	5.07056	5.05534	2638	32	3.42127
982	136.46	150.16	150.52	5.0709	5.0556	2651	71	3.42341
982	136.48	150.18	150.54	5.07123	5.05586	2491	97	3.39637
982	136.52	150.22	150.58	5.0719	5.05638	2681	71	3.4283
982	136.53	150.23	150.59	5.07207	5.05651	2745	28	3.43854
982	136.57	150.27	150.63	5.07274	5.05703	1975	74	3.29557
982	136.6	150.3	150.66	5.07324	5.05742	3099	70	3.49122
982	136.61	150.31	150.67	5.07341	5.05755	3230	67	3.5092
982	136.64	150.34	150.7	5.07391	5.05794	3235	28	3.50987
982	136.69	150.39	150.75	5.07475	5.05858	2962	72	3.47159
982	136.72	150.42	150.78	5.07525	5.05897	3411	103	3.53288
982	136.73	150.43	150.79	5.07542	5.0591	3681	93	3.56597
982	136.79	150.49	150.85	5.07642	5.05988	3862	83	3.58681
982	136.8	150.5	150.86	5.07659	5.06001	4233	153	3.62665
982	136.81	150.51	150.87	5.07676	5.06014	3613	57	3.55787
982	136.83	150.53	150.89	5.07709	5.0604	3745	65	3.57345
982	136.88	150.58	150.94	5.07793	5.06105	3644	81	3.56158
982	136.91	150.61	150.97	5.07843	5.06144	4151	4	3.61815
982	136.92	150.62	150.98	5.0786	5.06157	3835	50	3.58377
982	136.93	150.63	150.99	5.07877	5.0617	3763	76	3.57553
982	136.98	150.68	151.04	5.0796	5.06235	2820	18	3.45025
982	137.01	150.71	151.07	5.08011	5.06274	2315	39	3.36455
982	137.02	150.72	151.08	5.08027	5.06287	2016	46	3.30449
982	137.03	150.73	151.09	5.08044	5.063	1787	62	3.25212
982	137.06	150.76	151.12	5.08094	5.06339	1767	76	3.24724
982	137.09	150.79	151.15	5.08144	5.06378	2008	95	3.30276
982	137.1	150.8	151.16	5.08161	5.06391	1760	47	3.24551
982	137.11	150.81	151.17	5.08178	5.06404	1773	42	3.24871
982	137.15	150.85	151.21	5.08245	5.06455	1692	68	3.2284
982	137.16	150.86	151.22	5.08262	5.06468	1747	68	3.24229
982	137.18	150.88	151.24	5.08295	5.06494	1617	100	3.20871
982	137.21	150.91	151.27	5.08345	5.06533	1794	60	3.25382
982	137.23	150.93	151.29	5.08379	5.06559	1758	84	3.24502
982	137.24	150.94	151.3	5.08396	5.06572	1765	100	3.24674
982	137.27	150.97	151.33	5.08446	5.06611	1733	53	3.2388
982	137.29	150.99	151.35	5.08479	5.06637	1659	73	3.21985
982	137.32	151.02	151.38	5.0853	5.06676	1630	58	3.21219
982	137.34	151.04	151.4	5.08563	5.06702	2122	84	3.32675
982	137.35	151.05	151.41	5.0858	5.06715	1816	156	3.25912
982	137.36	151.06	151.42	5.08597	5.06728	1947	94	3.28937
982	137.38	151.08	151.44	5.0863	5.06754	2008	86	3.30276
982	137.4	151.1	151.46	5.08664	5.0678	2148	76	3.33203
982	137.41	151.11	151.47	5.0868	5.06793	2054	27	3.3126
982	137.44	151.14	151.5	5.08731	5.06832	2216	130	3.34557
982	137.46	151.16	151.52	5.08764	5.06858	2351	92	3.37125
982	137.47	151.17	151.53	5.08781	5.06871	2170	54	3.33646
982	137.5	151.2	151.56	5.08831	5.0691	2156	62	3.33365
982	137.52	151.22	151.58	5.08864	5.06936	2627	108	3.41946
982	137.54	151.24	151.6	5.08898	5.06962	2611	145	3.41681
982	137.55	151.25	151.61	5.08915	5.06975	2829	92	3.45163
982	137.58	151.28	151.64	5.08965	5.07014	2887	115	3.46045
982	137.62	151.32	151.68	5.09032	5.07065	3492	120	3.54307
982	137.64	151.34	151.7	5.09065	5.07091	3836	150	3.58388
982	137.68	151.38	151.74	5.09132	5.07143	4534	184	3.65648
982	137.69	151.39	151.75	5.09149	5.07156	5131	220	3.7102
982	137.7	151.4	151.76	5.09166	5.07169	4603	164	3.66304
982	137.73	151.43	151.79	5.09216	5.07208	4933	137	3.69311
982	137.74	151.44	151.8	5.09233	5.07221	4099	172	3.61268
982	137.76	151.46	151.82	5.09266	5.07247	4905	146	3.69064
982	137.79	151.49	151.85	5.09317	5.07286	2165	94	3.33546
982	137.8	151.5	151.86	5.09333	5.07299	2971	140	3.4729
982	137.83	151.53	151.89	5.09384	5.07338	2675	81	3.42732
982	137.84	151.54	151.9	5.094	5.07351	1657	74	3.21932
982	137.86	151.56	151.92	5.09434	5.07377	1988	76	3.29842
982	137.89	151.59	151.95	5.09484	5.07416	1901	47	3.27898
982	137.9	151.6	151.96	5.09501	5.07429	2064	60	3.31471
982	137.92	151.62	151.98	5.09534	5.07455	2378	161	3.37621
982	137.95	151.65	152.01	5.09584	5.07494	1517	83	3.18099
982	137.96	151.66	152.02	5.09601	5.07507	1725	43	3.23679
982	137.98	151.68	152.04	5.09635	5.07533	1982	127	3.2971
982	140.02	154.47	154.76	5.14306	5.13464	2097	102	3.3216
982	140.04	154.49	154.78	5.1434	5.13517	2220	89	3.34635
982	140.06	154.51	154.8	5.14373	5.1357	2242	84	3.35064
982	140.07	154.52	154.81	5.1439	5.13596	2291	105	3.36003
982	140.11	154.56	154.85	5.14457	5.13702	2063	90	3.3145
982	140.12	154.57	154.86	5.14474	5.13728	2176	43	3.33766
982	140.14	154.59	154.88	5.14507	5.13781	2005	62	3.30211
982	140.16	154.61	154.9	5.14541	5.13834	2407	63	3.38148
982	140.17	154.62	154.91	5.14558	5.1386	2226	89	3.34753
982	140.2	154.65	154.94	5.14608	5.1394	2282	101	3.35832
982	140.22	154.67	154.96	5.14641	5.13992	2289	111	3.35965
982	140.23	154.68	154.97	5.14658	5.14019	2624	58	3.41896
982	140.27	154.72	155.01	5.14725	5.14125	2595	-9	3.41414
982	140.28	154.73	155.02	5.14742	5.14151	2431	83	3.38578
982	140.31	154.76	155.05	5.14792	5.1423	2573	59	3.41044
982	140.32	154.77	155.06	5.14809	5.14257	2827	53	3.45133
982	140.34	154.79	155.08	5.14842	5.14309	2546	73	3.40586
982	140.36	154.81	155.1	5.14876	5.14362	2785	57	3.44483
982	140.39	154.84	155.13	5.14926	5.14442	2678	100	3.42781
982	140.4	154.85	155.14	5.14943	5.14468	2819	58	3.4501
982	140.42	154.87	155.16	5.14976	5.14521	3208	95	3.50623
982	140.44	154.89	155.18	5.1501	5.14574	2728	94	3.43584
982	140.46	154.91	155.2	5.15043	5.14626	3097	86	3.49094
982	140.48	154.93	155.22	5.15077	5.14679	3355	96	3.52569
982	140.51	154.96	155.25	5.15127	5.14758	3713	82	3.56972
982	140.52	154.97	155.26	5.15144	5.14785	3562	86	3.55169
982	140.54	154.99	155.28	5.15177	5.14838	3674	72	3.56514
982	140.56	155.01	155.3	5.15211	5.14891	4356	112	3.63909
982	140.57	155.02	155.31	5.15227	5.14917	4597	216	3.66247
982	140.61	155.06	155.35	5.15294	5.15023	3790	138	3.57864
982	140.62	155.07	155.36	5.15311	5.15049	3689	124	3.56691
982	140.65	155.1	155.39	5.15361	5.15128	2728	290	3.95995
982	140.66	155.11	155.4	5.15378	5.15155	2728	244	3.91798
982	140.67	155.12	155.41	5.15395	5.15181	7293	245	3.86291
982	140.7	155.15	155.44	5.15445	5.1526	6733	229	3.82821
982	140.73	155.18	155.47	5.15495	5.1534	2997	73	3.47669
982	140.74	155.19	155.48	5.15512	5.15366	4554	216	3.65839
982	140.76	155.21	155.5	5.15546	5.15419	4259	96	3.62931
982	140.78	155.23	155.52	5.15579	5.15472	3565	105	3.55206
982	140.79	155.24	155.53	5.15596	5.15498	2995	139	3.4764
982	140.82	155.27	155.56	5.15646	5.15577	2767	73	3.44201
982	140.84	155.29	155.58	5.15679	5.1563	2404	98	3.38093
982	140.86	155.31	155.6	5.15713	5.15683	2671	42	3.42667
982	140.88	155.33	155.62	5.15746	5.15736	4286	113	3.63205
982	140.89	155.34	155.63	5.15763	5.15762	4383	106	3.64177
982	140.92	155.37	155.66	5.15813	5.15842	2258	108	3.35372
982	140.94	155.39	155.68	5.15847	5.15894	2457	99	3.39041
982	140.96	155.41	155.7	5.1588	5.15947	2415	96	3.38292
982	140.98	155.43	155.72	5.15914	5.16	2415	64	3.38292
982	140.99	155.44	155.73	5.15931	5.16016	2238	54	3.34986
982	141.02	155.47	155.76	5.15981	5.16066	2583	74	3.41212
982	141.04	155.49	155.78	5.16014	5.16098	2530	110	3.40312
982	141.06	155.51	155.8	5.16048	5.16131	2479	59	3.39428
982	141.09	155.54	155.83	5.16098	5.1618	2496	125	3.39724
982	141.1	155.55	155.84	5.16115	5.16197	2583	66	3.41212
982	141.12	155.57	155.86	5.16148	5.1623	2589	8	3.41313
982	141.13	155.58	155.87	5.16165	5.16246	2465	110	3.39182
982	141.16	155.61	155.9	5.16215	5.16295	2402	74	3.38057
982	141.18	155.63	155.92	5.16249	5.16328	2230	34	3.3483
982	141.2	155.65	155.94	5.16282	5.16361	2293	64	3.3604
982	141.22	155.67	155.96	5.16316	5.16394	2560	74	3.40824
982	141.23	155.68	155.97	5.16332	5.1641	2512	45	3.40002
982	141.26	155.71	156	5.16383	5.16459	2403	59	3.38075
982	141.28	155.73	156.02	5.16416	5.16492	2223	73	3.34694
982	141.29	155.74	156.03	5.16433	5.16508	2385	76	3.37749
982	141.32	155.77	156.06	5.16483	5.16558	2342	81	3.36959
982	141.34	155.79	156.08	5.16517	5.1659	2906	78	3.4633
982	141.35	155.8	156.09	5.16533	5.16607	2797	37	3.44669
982	141.4	155.85	156.14	5.16617	5.16689	3003	72	3.47756
982	141.42	155.87	156.16	5.16651	5.16722	2983	61	3.47465
982	141.44	155.89	156.18	5.16684	5.16754	3152	36	3.49859
982	141.48	155.93	156.22	5.16751	5.1682	3332	47	3.5227
982	141.52	155.97	156.26	5.16818	5.16886	3340	84	3.52375
982	141.54	155.99	156.28	5.16852	5.16918	3510	44	3.54531
982	141.55	156	156.29	5.16868	5.16935	3493	65	3.5432
982	141.6	156.05	156.34	5.16952	5.17017	3429	41	3.53517
982	141.61	156.06	156.35	5.16969	5.17033	3675	72	3.56526
982	141.62	156.07	156.36	5.16986	5.1705	3640	45	3.5611
982	141.64	156.09	156.38	5.17019	5.17082	3327	84	3.52205
982	141.65	156.1	156.39	5.17036	5.17099	3337	49	3.52336
982	141.71	156.16	156.45	5.17136	5.17197	2989	24	3.47553
982	141.72	156.17	156.46	5.17153	5.17214	3032	37	3.48173
982	141.74	156.19	156.48	5.17186	5.17246	2585	76	3.41246
982	141.86	156.31	156.6	5.17387	5.17443	1885	95	3.27531
982	141.9	156.35	156.64	5.17454	5.17509	2138	91	3.33001
982	141.91	156.36	156.65	5.17471	5.17525	2101	70	3.32243
982	141.92	156.37	156.66	5.17488	5.17542	2197	62	3.34183
982	141.93	156.38	156.67	5.17505	5.17558	2208	61	3.344
982	141.95	156.4	156.69	5.17538	5.17591	1687	97	3.22712
982	142	156.45	156.74	5.17622	5.17673	2005	62	3.30211
982	142.01	156.46	156.75	5.17639	5.17689	1786	86	3.25188
982	142.02	156.47	156.76	5.17655	5.17706	1721	55	3.23578
982	142.04	156.49	156.78	5.17689	5.17738	1753	61	3.24378
982	142.05	156.5	156.79	5.17706	5.17755	1637	34	3.21405
982	142.1	156.55	156.84	5.17789	5.17837	1456	39	3.16316
982	142.11	156.56	156.85	5.17806	5.17853	1609	79	3.20656
982	142.12	156.57	156.86	5.17823	5.1787	1380	89	3.13988
982	142.14	156.59	156.88	5.17856	5.17902	1519	15	3.18156
982	142.2	156.65	156.94	5.17957	5.18001	1524	61	3.18298
982	142.21	156.66	156.95	5.17973	5.18017	1703	72	3.23121
982	142.22	156.67	156.96	5.1799	5.18034	1532	56	3.18526
982	142.24	156.69	156.98	5.18024	5.18066	1538	84	3.18696
982	142.25	156.7	156.99	5.1804	5.18083	1548	60	3.18977
982	142.3	156.75	157.04	5.18124	5.18165	1691	59	3.22814
982	142.31	156.76	157.05	5.18141	5.18181	1717	110	3.23477
982	142.32	156.77	157.06	5.18158	5.18198	1677	63	3.22453
982	142.34	156.79	157.08	5.18191	5.1823	1591	87	3.20167
982	142.35	156.8	157.09	5.18208	5.18247	1584	106	3.19976
982	142.36	156.81	157.1	5.18225	5.18263	1682	92	3.22583
982	142.4	156.85	157.14	5.18292	5.18329	1666	42	3.22167
982	142.41	156.86	157.15	5.18308	5.18345	1804	5	3.25624
982	142.42	156.87	157.16	5.18325	5.18362	1588	40	3.20085
982	142.44	156.89	157.18	5.18359	5.18394	1716	16	3.23452
982	142.46	156.91	157.2	5.18392	5.18427	1619	97	3.20925
982	142.5	156.95	157.24	5.18459	5.18493	1472	129	3.16791
982	142.52	156.97	157.26	5.18493	5.18526	1692	-3	3.2284
982	142.54	156.99	157.28	5.18526	5.18558	1558	17	3.19257
982	142.55	157	157.29	5.18543	5.18575	1632	95	3.21272
982	142.6	157.05	157.34	5.18626	5.18657	1692	64	3.2284
982	142.61	157.06	157.35	5.18643	5.18673	1575	74	3.19728
982	142.62	157.07	157.36	5.1866	5.1869	1708	47	3.23249
982	142.64	157.09	157.38	5.18693	5.18722	1727	59	3.23729
982	142.65	157.1	157.39	5.1871	5.18739	1588	82	3.20085
982	142.66	157.11	157.4	5.18727	5.18755	1546	19	3.18921
982	142.71	157.16	157.45	5.18811	5.18837	1529	51	3.18441
982	142.72	157.17	157.46	5.18827	5.18854	1419	60	3.15198
982	142.74	157.19	157.48	5.18861	5.18886	1510	36	3.17898
982	142.75	157.2	157.49	5.18878	5.18903	1556	53	3.19201
982	142.8	157.25	157.54	5.18961	5.18985	1485	118	3.17173
982	142.81	157.26	157.55	5.18978	5.19001	1576	75	3.19756
982	142.82	157.27	157.56	5.18995	5.19018	1438	31	3.15776
982	142.84	157.29	157.58	5.19028	5.1905	1532	40	3.18526
982	142.85	157.3	157.59	5.19045	5.19067	1516	68	3.1807
982	142.91	157.36	157.65	5.19146	5.19165	1654	85	3.21854
982	142.92	157.37	157.66	5.19162	5.19182	1722	43	3.23603
982	142.94	157.39	157.68	5.19196	5.19214	1609	68	3.20656
982	142.95	157.4	157.69	5.19213	5.19231	1499	83	3.1758
982	143.02	157.47	157.76	5.1933	5.19346	1463	36	3.16524
982	143.04	157.49	157.78	5.19363	5.19378	1595	43	3.20276
982	143.06	157.51	157.8	5.19397	5.19411	1605	26	3.20548
982	143.1	157.55	157.84	5.19464	5.19477	1591	65	3.20167
982	143.11	157.56	157.85	5.1948	5.19493	1586	71	3.2003
982	143.12	157.57	157.86	5.19497	5.1951	1745	40	3.2418
982	143.14	157.59	157.88	5.19531	5.19542	1550	116	3.19033
982	143.16	157.61	157.9	5.19564	5.19575	1753	87	3.24378
982	143.2	157.65	157.94	5.19631	5.19641	1707	31	3.23223
982	143.21	157.66	157.95	5.19648	5.19657	1740	81	3.24055
982	143.22	157.67	157.96	5.19665	5.19674	1665	63	3.22141
982	143.24	157.69	157.98	5.19698	5.19706	1857	113	3.26881
982	143.25	157.7	157.99	5.19715	5.19723	1957	23	3.29159
982	143.3	157.75	158.04	5.19799	5.19805	1914	54	3.28194
982	143.31	157.76	158.05	5.19815	5.19821	1767	76	3.24724
982	143.32	157.77	158.06	5.19832	5.19838	1784	60	3.25139
982	143.34	157.79	158.08	5.19866	5.1987	1906	-3	3.28012
982	143.36	157.81	158.1	5.19899	5.19903	1792	72	3.25334
982	143.4	157.85	158.14	5.19966	5.19969	1752	49	3.24353
982	143.41	157.86	158.15	5.19983	5.19985	1846	27	3.26623
982	143.42	157.87	158.16	5.2	5.20002	1736	110	3.23955
982	143.44	157.89	158.18	5.20033	5.20034	1833	64	3.26316
982	143.46	157.91	158.2	5.20067	5.20067	1846	111	3.26623
982	143.5	157.95	158.24	5.20145	5.20145	1765	57	3.24674
982	143.51	157.96	158.25	5.20168	5.20168	1894	39	3.27738
982	143.53	157.98	158.27	5.20213	5.20213	1716	10	3.23452
982	143.54	157.99	158.28	5.20235	5.20235	1902	83	3.27921
982	143.56	158.01	158.3	5.2028	5.2028	1948	53	3.28959
982	143.6	158.05	158.34	5.20371	5.20371	2165	53	3.33546
982	143.63	158.08	158.37	5.20438	5.20438	1944	71	3.2887
982	143.64	158.09	158.38	5.20461	5.20461	2040	98	3.30963
982	143.65	158.1	158.39	5.20483	5.20483	1873	68	3.27254
982	143.71	158.16	158.45	5.20619	5.20619	1955	36	3.29115
982	143.72	158.17	158.46	5.20641	5.20641	1806	47	3.25672
982	143.74	158.19	158.48	5.20686	5.20686	1813	91	3.2584
982	143.76	158.21	158.5	5.20732	5.20732	2060	120	3.31387
982	143.8	158.25	158.54	5.20822	5.20822	2105	85	3.32325
982	143.81	158.26	158.55	5.20844	5.20844	1907	54	3.28035
982	143.83	158.28	158.57	5.20889	5.20889	2106	9	3.32346
982	143.84	158.29	158.58	5.20912	5.20912	2021	72	3.30557
982	143.85	158.3	158.59	5.20935	5.20935	2160	73	3.33445
982	143.9	158.35	158.64	5.21047	5.21047	2076	60	3.31723
982	143.91	158.36	158.65	5.2107	5.2107	1789	9	3.25261
982	143.92	158.37	158.66	5.21092	5.21092	1973	39	3.29513
982	143.94	158.39	158.68	5.21138	5.21138	2026	59	3.30664
982	143.95	158.4	158.69	5.2116	5.2116	1924	84	3.28421
982	143.96	158.41	158.7	5.21183	5.21183	1831	32	3.26269
982	144	158.45	158.74	5.21273	5.21273	1864	64	3.27045
982	144.01	158.46	158.75	5.21295	5.21295	2059	69	3.31366
982	144.02	158.47	158.76	5.21318	5.21318	2156	95	3.33365
982	144.04	158.49	158.78	5.21363	5.21363	2409	58	3.38184
982	144.06	158.51	158.8	5.21408	5.21408	2317	42	3.36493
982	144.1	158.55	158.84	5.21498	5.21498	2519	80	3.40123
982	144.11	158.56	158.85	5.21521	5.21521	2445	110	3.38828
982	144.12	158.57	158.86	5.21544	5.21544	2603	53	3.41547
982	144.13	158.58	158.87	5.21566	5.21566	2433	68	3.38614
982	144.15	158.6	158.89	5.21611	5.21611	2584	66	3.41229
982	144.16	158.61	158.9	5.21634	5.21634	2608	91	3.41631
982	144.2	158.65	158.94	5.21724	5.21724	2418	94	3.38346
982	144.21	158.66	158.95	5.21747	5.21747	2293	38	3.3604
982	144.22	158.67	158.96	5.21769	5.21769	2379	31	3.37639
982	144.23	158.68	158.97	5.21792	5.21792	2572	48	3.41027
982	144.26	158.71	159	5.21859	5.21859	2625	112	3.41913
982	144.3	158.75	159.04	5.2195	5.2195	2290	117	3.35984
982	144.31	158.76	159.05	5.21972	5.21972	2701	102	3.43152
982	144.32	158.77	159.06	5.21995	5.21995	3059	46	3.48558
982	144.34	158.79	159.08	5.2204	5.2204	2577	113	3.41111
982	144.35	158.8	159.09	5.22062	5.22062	2643	66	3.4221
982	144.36	158.81	159.1	5.22085	5.22085	2806	82	3.44809
982	144.4	158.85	159.14	5.22175	5.22175	2807	39	3.44824
982	144.41	158.86	159.15	5.22198	5.22198	2737	51	3.43727
982	144.42	158.87	159.16	5.2222	5.2222	2927	118	3.46642
982	144.45	158.9	159.19	5.22288	5.22288	2893	106	3.46135
982	144.52	158.97	159.26	5.22446	5.22446	2640	79	3.4216
982	144.54	158.99	159.28	5.22491	5.22491	2674	43	3.42716
982	144.55	159	159.29	5.22514	5.22514	2904	36	3.463
982	144.6	159.05	159.34	5.22626	5.22626	2662	53	3.42521
982	144.62	159.07	159.36	5.22671	5.22671	2562	91	3.40858
982	144.64	159.09	159.38	5.22717	5.22717	2480	30	3.39445
982	144.65	159.1	159.39	5.22739	5.22739	2573	26	3.41044
982	144.7	159.15	159.44	5.22852	5.22852	2350	73	3.37107
982	144.71	159.16	159.45	5.22874	5.22874	2466	56	3.39199
982	144.72	159.17	159.46	5.22897	5.22897	2276	56	3.35717
982	144.74	159.19	159.48	5.22942	5.22942	2285	23	3.35889
982	144.75	159.2	159.49	5.22965	5.22965	2471	51	3.39287
982	144.8	159.25	159.54	5.23077	5.23077	2336	43	3.36847
982	144.8	159.25	159.54	5.23077	5.23077	2347	53	3.37051
982	144.81	159.26	159.55	5.231	5.231	2559	78	3.40807
982	144.82	159.27	159.56	5.23123	5.23123	2246	106	3.35141
982	144.83	159.28	159.57	5.23145	5.23145	2190	67	3.34044
982	144.9	159.35	159.64	5.23303	5.23303	2289	53	3.35965
982	144.9	159.35	159.64	5.23303	5.23303	2378	57	3.37621
982	144.91	159.36	159.65	5.23326	5.23326	2273	83	3.3566
982	144.92	159.37	159.66	5.23348	5.23348	2500	66	3.39794
982	144.93	159.38	159.67	5.23371	5.23371	2446	66	3.38846
982	144.95	159.4	159.69	5.23416	5.23416	2664	97	3.42553
982	145	159.45	159.74	5.23529	5.23529	2553	91	3.40705
982	145.01	159.46	159.75	5.23551	5.23551	2468	58	3.39235
982	145.02	159.47	159.76	5.23574	5.23574	2621	88	3.41847
982	145.04	159.49	159.78	5.23619	5.23619	2513	105	3.40019
982	145.06	159.51	159.8	5.23664	5.23664	2534	75	3.40381
982	145.1	159.55	159.84	5.23754	5.23754	2253	55	3.35276
982	145.11	159.56	159.85	5.23777	5.23777	2336	31	3.36847
982	145.12	159.57	159.86	5.23799	5.23799	2285	73	3.35889
982	145.14	159.59	159.88	5.23844	5.23844	2425	72	3.38471
982	145.15	159.6	159.89	5.23867	5.23867	2048	81	3.31133
982	145.16	159.61	159.9	5.23889	5.23889	2211	41	3.34459
982	145.21	159.66	159.95	5.24002	5.24002	1907	118	3.28035
982	145.22	159.67	159.96	5.24025	5.24025	2147	111	3.33183
982	145.24	159.69	159.98	5.2407	5.2407	1717	56	3.23477
982	145.26	159.71	160	5.24115	5.24115	1950	36	3.29003
982	145.3	159.75	160.04	5.24205	5.24205	1794	81	3.25382
982	145.31	159.76	160.05	5.24228	5.24228	2060	33	3.31387
982	145.32	159.77	160.06	5.2425	5.2425	1906	66	3.28012
982	145.34	159.79	160.08	5.24295	5.24295	1983	73	3.29732
982	145.35	159.8	160.09	5.24318	5.24318	1906	26	3.28012
982	145.4	159.85	160.14	5.24431	5.24431	2045	101	3.31069
982	145.41	159.86	160.15	5.24453	5.24453	1919	77	3.28307
982	145.42	159.87	160.16	5.24476	5.24476	1955	88	3.29115
982	145.44	159.89	160.18	5.24521	5.24521	2035	51	3.30856
982	145.46	159.91	160.2	5.24566	5.24566	2057	46	3.31323
982	145.5	159.95	160.24	5.24656	5.24656	1782	60	3.25091
982	145.51	159.96	160.25	5.24679	5.24679	2057	41	3.31323
982	145.52	159.97	160.26	5.24702	5.24702	1984	43	3.29754
982	145.54	159.99	160.28	5.24747	5.24747	2015	117	3.30428
982	145.55	160	160.29	5.24769	5.24769	2008	47	3.30276
982	145.6	160.05	160.34	5.24882	5.24882	1919	18	3.28307
982	145.61	160.06	160.35	5.24905	5.24905	2116	71	3.32552
982	145.62	160.07	160.36	5.24927	5.24927	1954	77	3.29092
982	145.64	160.09	160.38	5.24972	5.24972	2137	53	3.3298
982	145.66	160.11	160.4	5.25017	5.25017	2101	83	3.32243
982	145.71	160.16	160.45	5.2513	5.2513	2063	85	3.3145
982	145.72	160.17	160.46	5.25153	5.25153	2081	92	3.31827
982	145.73	160.18	160.47	5.25175	5.25175	2073	111	3.3166
982	145.8	160.25	160.54	5.25333	5.25333	1936	-13	3.28691
982	145.81	160.26	160.55	5.25356	5.25356	1839	85	3.26458
982	145.82	160.27	160.56	5.25378	5.25378	1906	35	3.28012
982	145.84	160.29	160.58	5.25423	5.25423	2057	74	3.31323
982	145.86	160.31	160.6	5.25468	5.25468	1893	37	3.27715
982	145.9	160.35	160.64	5.25559	5.25559	2132	49	3.32879
982	145.91	160.36	160.65	5.25581	5.25581	2128	54	3.32797
982	145.92	160.37	160.66	5.25604	5.25604	2144	90	3.33122
982	145.94	160.39	160.68	5.25649	5.25649	2085	62	3.31911
982	145.96	160.41	160.7	5.25694	5.25694	2128	55	3.32797
982	146.02	160.47	160.76	5.25829	5.25829	2155	56	3.33345
982	146.04	160.49	160.78	5.25874	5.25874	2175	64	3.33746
982	146.05	160.5	160.79	5.25897	5.25897	2217	85	3.34577
982	146.1	160.55	160.84	5.2601	5.2601	2616	87	3.41764
982	146.13	160.58	160.87	5.26077	5.26077	2404	61	3.38093
982	146.14	160.59	160.88	5.261	5.261	2137	45	3.3298
982	146.15	160.6	160.89	5.26123	5.26123	2346	65	3.37033
982	146.2	160.65	160.94	5.26235	5.26235	2294	102	3.36059
982	146.21	160.66	160.95	5.26258	5.26258	2610	91	3.41664
982	146.23	160.68	160.97	5.26303	5.26303	2200	47	3.34242
982	146.24	160.69	160.98	5.26326	5.26326	2230	76	3.3483
982	146.25	160.7	160.99	5.26348	5.26348	2313	105	3.36418
982	146.3	160.75	161.04	5.26461	5.26461	2151	71	3.33264
982	146.32	160.77	161.06	5.26506	5.26506	2261	50	3.3543
982	146.34	160.79	161.08	5.26551	5.26551	2085	47	3.31911
982	146.36	160.81	161.1	5.26596	5.26596	1922	45	3.28375
982	146.41	160.86	161.15	5.26709	5.26709	2022	10	3.30578
982	146.42	160.87	161.16	5.26732	5.26732	2009	51	3.30298
982	146.44	160.89	161.18	5.26777	5.26777	1776	75	3.24944
982	146.45	160.9	161.19	5.26799	5.26799	1918	51	3.28285
982	146.5	160.95	161.24	5.26912	5.26912	1775	68	3.2492
982	146.51	160.96	161.25	5.26935	5.26935	1892	43	3.27692
982	146.53	160.98	161.27	5.2698	5.2698	1910	3	3.28103
982	146.54	160.99	161.28	5.27002	5.27002	1888	42	3.276
982	146.55	161	161.29	5.27025	5.27025	1968	32	3.29403
982	146.62	161.07	161.36	5.27183	5.27183	2123	53	3.32695
982	146.65	161.1	161.39	5.2725	5.2725	1972	77	3.29491
982	146.66	161.11	161.4	5.27273	5.27273	2069	76	3.31576
982	146.67	161.12	161.41	5.27295	5.27295	1963	38	3.29292
982	146.7	161.15	161.44	5.27363	5.27363	2324	71	3.36624
982	146.71	161.16	161.45	5.27386	5.27386	2064	86	3.31471
982	146.74	161.19	161.48	5.27453	5.27453	2109	82	3.32408
982	146.76	161.21	161.5	5.27498	5.27498	2076	79	3.31723
982	146.77	161.22	161.51	5.27521	5.27521	2186	78	3.33965
982	146.8	161.25	161.54	5.27589	5.27589	2104	62	3.32305
982	146.82	161.27	161.56	5.27634	5.27634	2083	71	3.31869
982	146.85	161.3	161.59	5.27702	5.27702	2264	34	3.35488
982	146.86	161.31	161.6	5.27724	5.27724	2370	90	3.37475
982	146.87	161.32	161.61	5.27747	5.27747	2285	12	3.35889
982	146.9	161.35	161.64	5.27814	5.27814	2111	12	3.32449
982	146.92	161.37	161.66	5.27859	5.27859	1873	18	3.27254
982	146.94	161.39	161.68	5.27905	5.27905	2241	94	3.35044
982	146.96	161.41	161.7	5.2795	5.2795	2073	73	3.3166
982	146.97	161.42	161.71	5.27972	5.27972	1843	99	3.26553
982	147	161.45	161.74	5.2804	5.2804	2097	35	3.3216
982	147.02	161.47	161.76	5.28085	5.28085	2016	31	3.30449
982	147.03	161.48	161.77	5.28108	5.28108	1972	82	3.29491
982	147.06	161.51	161.8	5.28175	5.28175	1922	39	3.28375
982	147.08	161.53	161.82	5.2822	5.2822	1953	72	3.2907
982	147.09	161.54	161.83	5.28243	5.28243	1964	61	3.29314
982	147.12	161.57	161.86	5.28311	5.28311	2286	75	3.35908
982	147.13	161.58	161.87	5.28333	5.28333	1848	136	3.2667
982	147.16	161.61	161.9	5.28401	5.28401	2130	45	3.32838
982	147.19	161.64	161.93	5.28468	5.28468	2403	37	3.38075
982	147.2	161.65	161.94	5.28491	5.28491	2300	87	3.36173
982	147.21	161.66	161.95	5.28514	5.28514	2446	54	3.38846
982	147.24	161.69	161.98	5.28581	5.28581	2398	66	3.37985
982	147.26	161.71	162	5.28626	5.28626	2379	72	3.37639
982	147.3	161.75	162.04	5.28717	5.28717	2570	13	3.40993
982	147.33	161.78	162.07	5.28784	5.28784	2221	53	3.34655
982	147.34	161.79	162.08	5.28807	5.28807	2232	61	3.34869
982	147.35	161.8	162.09	5.28829	5.28829	2264	41	3.35488
982	147.38	161.83	162.12	5.28897	5.28897	2517	34	3.40088
982	147.39	161.84	162.13	5.2892	5.2892	2499	24	3.39777
982	147.4	161.85	162.14	5.28942	5.28942	2628	54	3.41963
982	147.41	161.86	162.15	5.28965	5.28965	2602	9	3.41531
982	147.44	161.89	162.18	5.29032	5.29032	2400		3.38021
982	147.46	161.91	162.2	5.29077	5.29077	2236	91	3.34947
982	147.48	161.93	162.22	5.29123	5.29123	2281	80	3.35813
982	149.96	165.4	165.55	5.37557	5.37401	2839	52	3.45317
982	149.97	165.41	165.56	5.37582	5.37425	2876	47	3.45879
982	150	165.44	165.59	5.37659	5.37499	2656	47	3.42423
982	150.02	165.46	165.61	5.37709	5.37549	2789	34	3.44545
982	150.04	165.48	165.63	5.3776	5.37598	3184	84	3.50297
982	150.07	165.51	165.66	5.37836	5.37672	3339	100	3.52362
982	150.08	165.52	165.67	5.37862	5.37697	2817	108	3.44979
982	150.1	165.54	165.69	5.37912	5.37746	2480	80	3.39445
982	150.12	165.56	165.71	5.37963	5.37795	2643	95	3.4221
982	150.13	165.57	165.72	5.37989	5.3782	2640	73	3.4216
982	150.14	165.58	165.73	5.38014	5.37845	2429	79	3.38543
982	150.16	165.6	165.75	5.38065	5.37894	2281	49	3.35813
982	150.18	165.62	165.77	5.38115	5.37943	2306	58	3.36286
982	150.19	165.63	165.78	5.38141	5.37968	2530	76	3.40312
982	150.22	165.66	165.81	5.38217	5.38042	2390	59	3.3784
982	150.23	165.67	165.82	5.38242	5.38066	2489	12	3.39602
982	150.26	165.7	165.85	5.38319	5.3814	2370	78	3.37475
982	150.27	165.71	165.86	5.38344	5.38165	2259	56	3.35392
982	150.28	165.72	165.87	5.38369	5.3819	2141	52	3.33062
982	150.3	165.74	165.89	5.3842	5.38239	2426	101	3.38489
982	150.31	165.75	165.9	5.38445	5.38264	2344	79	3.36996
982	150.34	165.78	165.93	5.38522	5.38338	2161	57	3.33465
982	150.37	165.81	165.96	5.38598	5.38412	2377	51	3.37603
982	150.38	165.82	165.97	5.38623	5.38436	2068	52	3.31555
982	150.39	165.83	165.98	5.38648	5.38461	2338	120	3.36884
982	150.42	165.86	166.01	5.38725	5.38535	2557	115	3.40773
982	150.43	165.87	166.02	5.3875	5.3856	2413	25	3.38256
982	150.44	165.88	166.03	5.38775	5.38584	2535	52	3.40398
982	150.45	165.89	166.04	5.38801	5.38609	2479	52	3.39428
982	150.48	165.92	166.07	5.38877	5.38683	2289	35	3.35965
982	150.51	165.95	166.1	5.38953	5.38757	2832	94	3.45209
982	150.52	165.96	166.11	5.38978	5.38781	2547	91	3.40603
982	150.53	165.97	166.12	5.39004	5.38806	2504	73	3.39863
982	150.56	166	166.15	5.3908	5.3888	2503	68	3.39846
982	150.58	166.02	166.17	5.39131	5.38929	2530	120	3.40312
982	150.6	166.04	166.19	5.39181	5.38979	2936	67	3.46776
982	150.62	166.06	166.21	5.39232	5.39028	2622	59	3.41863
982	150.63	166.07	166.22	5.39258	5.39053	2703	116	3.43185
982	150.67	166.11	166.26	5.39359	5.39151	2987	26	3.47524
982	150.68	166.12	166.27	5.39385	5.39176	2805	75	3.44793
982	150.71	166.15	166.3	5.39461	5.3925	2720	112	3.43457
982	150.72	166.16	166.31	5.39486	5.39275	2906	72	3.4633
982	150.74	166.18	166.33	5.39537	5.39324	2881	65	3.45954
982	150.76	166.2	166.35	5.39588	5.39373	2570	93	3.40993
982	150.78	166.22	166.37	5.39638	5.39422	2713	44	3.43345
982	150.79	166.23	166.38	5.39664	5.39447	2915	63	3.46464
982	150.82	166.26	166.41	5.3974	5.39521	3119	121	3.49402
982	150.83	166.27	166.42	5.39765	5.39546	2970	56	3.47276
982	150.86	166.3	166.45	5.39841	5.3962	3320	73	3.52114
982	150.88	166.32	166.47	5.39892	5.39669	3636	126	3.56062
982	150.91	166.35	166.5	5.39968	5.39743	3647	114	3.56194
982	150.92	166.36	166.51	5.39994	5.39768	4448	163	3.64816
982	150.94	166.38	166.53	5.40044	5.39817	3786	112	3.57818
982	150.95	166.39	166.54	5.4007	5.39842	4770	99	3.67852
982	150.97	166.41	166.56	5.40121	5.39891	3954	138	3.59704
982	151.02	166.46	166.61	5.40248	5.40014	5304	79	3.7246
982	151.04	166.48	166.63	5.40298	5.40064	7260	163	3.86094
982	151.06	166.5	166.65	5.40349	5.40113	7432	217	3.87111
982	151.08	166.52	166.67	5.404	5.40162	8118	225	3.90945
982	151.1	166.54	166.69	5.40451	5.40211	9139	280	3.9609
982	151.11	166.55	166.7	5.40476	5.40236	9160	335	3.9619
982	151.14	166.58	166.73	5.40552	5.4031	8035	219	3.90499
982	151.16	166.6	166.75	5.40603	5.40359	8569	266	3.93293
982	151.18	166.62	166.77	5.40654	5.40409	7667	211	3.88463
982	151.2	166.64	166.79	5.40704	5.40458	8893	247	3.94905
982	151.21	166.65	166.8	5.4073	5.40483	9381	253	3.97225
982	151.25	166.69	166.84	5.40831	5.40581	4770	322	4.05793
982	151.26	166.7	166.85	5.40857	5.40606	4770	150	4.08547
982	151.28	166.72	166.87	5.40907	5.40655	4770	150	4.21706
982	151.29	166.73	166.88	5.40933	5.4068	4770	150	4.1848
982	151.32	166.76	166.91	5.41009	5.40754	4770	150	3.67852
982	151.34	166.78	166.93	5.4106	5.40803	4770	150	3.67852
982	151.36	166.8	166.95	5.4111	5.40852	4770	150	4.25787
982	151.38	166.82	166.97	5.41161	5.40902	4770	150	4.15821
982	151.41	166.85	167	5.41237	5.40976	4770	150	4.22812
982	151.42	166.86	167.01	5.41263	5.41	4770	263	3.99109
982	151.45	166.89	167.04	5.41339	5.41074	8855	254	3.94719
982	151.46	166.9	167.05	5.41364	5.41099	8691	226	3.93907
982	151.47	166.91	167.06	5.4139	5.41124	4770	282	3.99123
982	151.5	166.94	167.09	5.41466	5.41198	6874	306	3.83721
982	151.53	166.97	167.12	5.41542	5.41272	2636	42	3.42095
982	151.54	166.98	167.13	5.41567	5.41296	3155	72	3.499
982	151.55	166.99	167.14	5.41593	5.41321	4099	119	3.61268
982	151.58	167.02	167.17	5.41669	5.41395	4367	117	3.64018
982	151.61	167.05	167.2	5.41745	5.41469	2628	40	3.41963
982	151.62	167.06	167.21	5.4177	5.41493	2514	77	3.40037
982	151.65	167.09	167.24	5.41847	5.41567	2718	73	3.43425
982	151.66	167.1	167.25	5.41872	5.41592	2682	150	3.42846
982	151.67	167.11	167.26	5.41897	5.41617	2215	89	3.34537
982	151.7	167.14	167.29	5.41973	5.41691	2453	124	3.3897
982	151.72	167.16	167.31	5.42024	5.4174	2617	92	3.4178
982	151.73	167.17	167.32	5.4205	5.41765	2528	107	3.40278
982	151.76	167.2	167.35	5.42126	5.41839	3266	77	3.51402
982	151.78	167.22	167.37	5.42177	5.41888	3326	85	3.52192
982	151.8	167.24	167.39	5.42227	5.41937	3217	85	3.50745
982	151.81	167.25	167.4	5.42253	5.41962	3542	87	3.54925
982	151.84	167.28	167.43	5.42329	5.42036	3440	57	3.53656
982	151.85	167.29	167.44	5.42354	5.42061	3602	61	3.55654
982	151.9	167.34	167.49	5.42481	5.42184	3594	60	3.55558
982	151.92	167.36	167.51	5.42532	5.42233	3089	69	3.48982
982	151.94	167.38	167.53	5.42583	5.42282	3337	76	3.52336
982	151.95	167.39	167.54	5.42608	5.42307	3259	26	3.51308
982	152	167.44	167.59	5.42735	5.4243	3130	46	3.49554
982	152.01	167.45	167.6	5.4276	5.42455	2769	91	3.44232
982	152.02	167.46	167.61	5.42786	5.4248	3001	101	3.47727
982	152.04	167.48	167.63	5.42836	5.42529	3100	82	3.49136
982	152.05	167.49	167.64	5.42862	5.42554	3070	35	3.48714
982	152.1	167.54	167.69	5.42989	5.42677	2684	91	3.42878
982	152.11	167.55	167.7	5.43014	5.42702	2907	53	3.46345
982	152.12	167.56	167.71	5.4304	5.42726	2684	42	3.42878
982	152.14	167.58	167.73	5.4309	5.42776	2718	74	3.43425
982	152.15	167.59	167.74	5.43116	5.428	2684	108	3.42878
982	152.2	167.64	167.79	5.43243	5.42923	2721	107	3.43473
982	152.21	167.65	167.8	5.43268	5.42948	2541	85	3.405
982	152.22	167.66	167.81	5.43293	5.42973	2854	82	3.45545
982	152.24	167.68	167.83	5.43344	5.43022	2659	112	3.42472
982	152.26	167.7	167.85	5.43395	5.43071	2898	152	3.4621
982	152.31	167.75	167.9	5.43522	5.43195	3008	54	3.47828
982	152.32	167.76	167.91	5.43547	5.43219	3030	70	3.48144
982	152.34	167.78	167.93	5.43598	5.43269	3167	62	3.50065
982	152.36	167.8	167.95	5.43649	5.43318	3054	95	3.48487
982	152.4	167.84	167.99	5.4375	5.43417	3189	94	3.50365
982	152.41	167.85	168	5.43776	5.43441	3316	106	3.52061
982	152.44	167.88	168.03	5.43852	5.43515	3332	54	3.5227
982	152.46	167.9	168.05	5.43902	5.43564	3519	97	3.54642
982	152.52	167.96	168.11	5.44055	5.43712	3167	47	3.50065
982	152.54	167.98	168.13	5.44106	5.43762	3739	75	3.57276
982	152.55	167.99	168.14	5.44131	5.43786	3685	92	3.56644
982	152.6	168.04	168.19	5.44258	5.4391	3121	103	3.49429
982	152.62	168.06	168.21	5.44309	5.43959	2582	108	3.41196
982	152.64	168.08	168.23	5.44359	5.44008	2389	58	3.37822
982	152.65	168.09	168.24	5.44385	5.44033	2393	79	3.37894
982	152.7	168.14	168.29	5.44512	5.44156	2250	58	3.35218
982	152.72	168.16	168.31	5.44562	5.44206	2315	82	3.36455
982	152.74	168.18	168.33	5.44613	5.44255	2166	108	3.33566
982	152.75	168.19	168.34	5.44639	5.44279	2497	80	3.39742
982	152.8	168.24	168.39	5.44765	5.44403	2191	76	3.34064
982	152.82	168.26	168.41	5.44816	5.44452	2045	31	3.31069
982	152.84	168.28	168.43	5.44867	5.44501	2041	99	3.30984
982	152.86	168.3	168.45	5.44918	5.44551	1862	118	3.26998
982	152.9	168.34	168.49	5.45019	5.44643	2090	40	3.32015
982	152.93	168.37	168.52	5.45095	5.44707	1880	69	3.27416
982	152.94	168.38	168.53	5.45121	5.44728	2028	46	3.30707
982	152.95	168.39	168.54	5.45146	5.4475	2232	59	3.34869
982	152.96	168.4	168.55	5.45172	5.44771	2055	55	3.31281
982	153	168.44	168.59	5.45273	5.44857	1835	37	3.26364
982	153.01	168.45	168.6	5.45298	5.44878	1944	30	3.2887
982	153.04	168.48	168.63	5.45375	5.44943	2018	36	3.30492
982	153.05	168.49	168.64	5.454	5.44964	2361	57	3.3731
982	153.1	168.54	168.69	5.45527	5.45071	2075	83	3.31702
982	153.12	168.56	168.71	5.45578	5.45114	2015	63	3.30428
982	153.14	168.58	168.73	5.45628	5.45157	2230	52	3.3483
982	153.16	168.6	168.75	5.45679	5.45199	2431	96	3.38578
982	153.2	168.64	168.79	5.45781	5.45285	2220	99	3.34635
982	153.21	168.65	168.8	5.45806	5.45306	2638	91	3.42127
982	153.24	168.68	168.83	5.45882	5.45371	2649	71	3.42308
982	153.25	168.69	168.84	5.45908	5.45392	2682	75	3.42846
982	153.26	168.7	168.85	5.45933	5.45413	2739	84	3.43759
982	153.31	168.75	168.9	5.4606	5.45521	2894	89	3.4615
982	153.32	168.76	168.91	5.46085	5.45542	3013	80	3.479
982	153.34	168.78	168.93	5.46136	5.45585	3235	62	3.50987
982	153.35	168.79	168.94	5.46161	5.45606	3359	60	3.52621
982	153.4	168.84	168.99	5.46288	5.45713	3027	76	3.48101
982	153.42	168.86	169.01	5.46339	5.45756	2774	83	3.44311
982	153.44	168.88	169.03	5.4639	5.45799	3154	96	3.49886
982	153.45	168.89	169.04	5.46415	5.4582	2789	97	3.44545
982	153.49	168.93	169.08	5.46517	5.45906	2755	44	3.44012
982	153.5	168.94	169.09	5.46542	5.45927	2237	44	3.34967
982	153.52	168.96	169.11	5.46593	5.4597	2318	83	3.36511
982	153.54	168.98	169.13	5.46644	5.46013	2198	107	3.34203
982	153.55	168.99	169.14	5.46669	5.46034	2302	82	3.36211
982	153.6	169.04	169.19	5.46796	5.46141	2164	63	3.33526
982	153.61	169.05	169.2	5.46821	5.46163	1890	4	3.27646
982	153.62	169.06	169.21	5.46847	5.46184	2058	66	3.31345
982	153.64	169.08	169.23	5.46898	5.46227	1902	87	3.27921
982	153.65	169.09	169.24	5.46923	5.46248	2234	67	3.34908
982	153.71	169.15	169.3	5.47075	5.46377	2027	52	3.30685
982	153.72	169.16	169.31	5.47101	5.46398	2175	55	3.33746
982	153.74	169.18	169.33	5.47151	5.46441	2219	93	3.34616
982	153.75	169.19	169.34	5.47177	5.46462	1781	110	3.25066
982	153.8	169.24	169.39	5.47304	5.4657	2056	80	3.31302
982	153.81	169.25	169.4	5.47329	5.46591	1932	43	3.28601
982	153.82	169.26	169.41	5.47354	5.46612	1881	90	3.27439
982	153.84	169.28	169.43	5.47405	5.46655	1970	52	3.29447
982	153.85	169.29	169.44	5.47431	5.46677	1774	47	3.24895
982	153.92	169.36	169.51	5.47608	5.46826	1856	86	3.26858
982	153.93	169.37	169.52	5.47634	5.46848	2019	0	3.30514
982	153.94	169.38	169.53	5.47659	5.46869	2051	48	3.31197
982	153.96	169.4	169.55	5.4771	5.46912	2000	66	3.30103
982	153.97	169.41	169.56	5.47735	5.46933	1914	52	3.28194
982	154.02	169.46	169.61	5.47862	5.4704	2251	-30	3.35238
982	154.04	169.48	169.63	5.47913	5.47083	2268	53	3.35564
982	154.06	169.5	169.65	5.47964	5.47126	1923	52	3.28398
982	154.09	169.53	169.68	5.4804	5.4719	2019	108	3.30514
982	154.1	169.54	169.69	5.48065	5.47212	2091	44	3.32035
982	154.12	169.56	169.71	5.48116	5.47255	2390	100	3.3784
982	154.14	169.58	169.73	5.48167	5.47297	2238	68	3.34986
982	154.16	169.6	169.75	5.48217	5.4734	2242	62	3.35064
982	154.2	169.64	169.79	5.48319	5.47426	2084	128	3.3189
982	154.22	169.66	169.81	5.4837	5.47469	2265	43	3.35507
982	154.24	169.68	169.83	5.4842	5.47511	2115	70	3.32531
982	154.26	169.7	169.85	5.48471	5.47554	1982	39	3.2971
982	154.3	169.74	169.89	5.48573	5.4764	1951	55	3.29026
982	154.3	169.74	169.89	5.48573	5.4764	2179	46	3.33826
982	154.31	169.75	169.9	5.48598	5.47661	2028	87	3.30707
982	154.32	169.76	169.91	5.48623	5.47683	1994	84	3.29973
982	154.34	169.78	169.93	5.48674	5.47726	1858	77	3.26905
982	154.36	169.8	169.95	5.48725	5.47768	2052	84	3.31218
982	154.4	169.84	169.99	5.48827	5.47854	1836	57	3.26387
982	154.41	169.85	170	5.48852	5.47875	1861	90	3.26975
982	154.42	169.86	170.01	5.48877	5.47897	1770	9	3.24797
982	154.44	169.88	170.03	5.48928	5.4794	2013	29	3.30384
982	154.45	169.89	170.04	5.48953	5.47961	1726	34	3.23704
[truncated: 3,486 more rows]

## Sheet: Site 982 XRF data Hole C
IODP ID	mbsf	mcd (shipboard)	rmcd (this study)	AgeD17MT (this study)	AgeD17FT (this study)	Silica (counts)	Zirconium (counts)	ln(Silica) (counts)
[truncated: 1,535 more rows]
