# Supplementary material for: Reinforcing the North Atlantic backbone: revision and extension of the composite splice at ODP Site 982
Source: Copernicus journal article supplement (doi:10.5194/cp-2017-108), 2017-09-28
Supplement: Supplementary file 3 [file ST3 - Isotope data (29.08.2017).xlsx]

## Sheet: Site 982 isotopes
IODP ID	mbsf	mcd (shipboard)	rmcd (this study)	AgeD17MT (this study)	AgeD17FT (this study)	AgeH2001 (Hodell et al., 2001)	benthic d13C (in ‰ VPDB)	benthic d18O (in ‰ VPDB)	d13C offset (in ‰)	d18O offset (in ‰)	benthic d13C corrected to equilibrium (in ‰ VPDB)	benthic d13C CW only corrected to equilibrium (in ‰ VPDB)	benthic d18O corrected to equilibrium (in ‰ VPDB)	Source	Species
162-982A-12H-3-W 45	106.65	120.14	120.14	4.47887	4.47887	4.58995	0.72	2.04	0	0.64	0.72	0.72	2.68	Hodell et al., 2001	C.mundulus or C.wuellerstorfi
162-982A-12H-3-W 65	106.85	120.34	120.34	4.48439	4.48439	4.5929	0.84	2.04	0	0.64	0.84	0.84	2.68	Hodell et al., 2001	C.mundulus or C.wuellerstorfi
162-982A-12H-3-W 85	107.05	120.54	120.54	4.4899	4.4899	4.59584	0.81	1.98	0	0.64	0.81	0.81	2.62	Hodell et al., 2001	C.mundulus or C.wuellerstorfi
162-982A-12H-3-W 105	107.25	120.74	120.74	4.49541	4.49541	4.59878	0.75	1.92	0	0.64	0.75	0.75	2.56	Hodell et al., 2001	C.mundulus or C.wuellerstorfi
162-982A-12H-3-W 125	107.45	120.94	120.94	4.50092	4.50092	4.60172	0.76	2.07	0	0.64	0.76	0.76	2.71	Hodell et al., 2001	C.mundulus or C.wuellerstorfi
162-982A-12H-3-W 145	107.65	121.14	121.14	4.50644	4.50644	4.60466	0.4	2.01	0	0.64	0.4	0.4	2.65	Hodell et al., 2001	C.mundulus or C.wuellerstorfi
162-982A-12H-4-W 15	107.85	121.34	121.34	4.51195	4.51195	4.6076	0.61	2.04	0	0.64	0.61	0.61	2.68	Hodell et al., 2001	C.mundulus or C.wuellerstorfi
162-982A-12H-4-W 35	108.05	121.54	121.54	4.51746	4.51746	4.61054	0.73	2.15	0	0.64	0.73	0.73	2.79	Hodell et al., 2001	C.mundulus or C.wuellerstorfi
162-982A-12H-4-W 55	108.25	121.74	121.74	4.52297	4.52297	4.61348	0.48	2.23	0	0.64	0.48	0.48	2.87	Hodell et al., 2001	C.mundulus or C.wuellerstorfi
162-982A-12H-4-W 75	108.45	121.94	121.94	4.52849	4.52849	4.61642	0.73	2.22	0	0.64	0.73	0.73	2.86	Hodell et al., 2001	C.mundulus or C.wuellerstorfi
162-982A-12H-4-W 95	108.65	122.14	122.14	4.534	4.534	4.61936	0.41	2.29	0	0.64	0.41	0.41	2.93	Hodell et al., 2001	C.mundulus or C.wuellerstorfi
162-982A-12H-4-W 115	108.85	122.34	122.34	4.53951	4.53951	4.6223	0.62	2.17	0	0.64	0.62	0.62	2.81	Hodell et al., 2001	C.mundulus or C.wuellerstorfi
162-982A-12H-4-W 135	109.05	122.54	122.54	4.54502	4.54502	4.62524	0.74	2.15	0	0.64	0.74	0.74	2.79	Hodell et al., 2001	C.mundulus or C.wuellerstorfi
162-982A-12H-5-W 45	109.65	123.14	123.14	4.56156	4.56156	4.63406	0.69	2.18	0	0.64	0.69	0.69	2.82	Hodell et al., 2001	C.mundulus or C.wuellerstorfi
162-982A-12H-5-W 65	109.85	123.34	123.34	4.56708	4.56708	4.637	0.84	2.26	0	0.64	0.84	0.84	2.9	Hodell et al., 2001	C.mundulus or C.wuellerstorfi
162-982A-12H-5-W 85	110.05	123.54	123.54	4.57259	4.57259	4.63994	0.63	2.29	0	0.64	0.63	0.63	2.93	Hodell et al., 2001	C.mundulus or C.wuellerstorfi
162-982A-12H-5-W 105	110.25	123.74	123.74	4.5781	4.5781	4.64288	0.61	2.3	0	0.64	0.61	0.61	2.94	Hodell et al., 2001	C.mundulus or C.wuellerstorfi
162-982B-13H-2-W 95	112.45	123.99	123.99	4.58499	4.58499	4.64656	0.61	2.35	0	0.64	0.61	0.61	2.99	Hodell et al., 2001	C.mundulus or C.wuellerstorfi
162-982B-13H-2-W 115	112.65	124.19	124.19	4.5905	4.5905	4.6495	0.54	2.09	0	0.64	0.54	0.54	2.73	Hodell et al., 2001	C.mundulus or C.wuellerstorfi
162-982B-13H-2-W 135	112.85	124.39	124.39	4.59602	4.59602	4.65244	0.71	2.08	0	0.64	0.71	0.71	2.72	Hodell et al., 2001	C.mundulus or C.wuellerstorfi
162-982B-13H-3-W 5	113.05	124.59	124.59	4.60153	4.60153	4.65538	0.61	2.16	0	0.64	0.61	0.61	2.8	Hodell et al., 2001	C.mundulus or C.wuellerstorfi
162-982B-13H-3-W 25	113.25	124.79	124.79	4.60704	4.60704	4.65832	0.63	2.03	0	0.64	0.63	0.63	2.67	Hodell et al., 2001	C.mundulus or C.wuellerstorfi
162-982B-13H-3-W 45	113.45	124.99	124.99	4.61255	4.61255	4.66126	0.69	2.06	0	0.64	0.69	0.69	2.7	Hodell et al., 2001	C.mundulus or C.wuellerstorfi
162-982B-13H-3-W 65	113.65	125.19	125.19	4.61807	4.61807	4.6642	0.64	2	0	0.64	0.64	0.64	2.64	Hodell et al., 2001	C.mundulus or C.wuellerstorfi
162-982B-13H-3-W 85	113.85	125.39	125.39	4.62358	4.62358	4.66714	0.54	2.11	0	0.64	0.54	0.54	2.75	Hodell et al., 2001	C.mundulus or C.wuellerstorfi
162-982B-13H-3-W 105	114.05	125.59	125.59	4.62909	4.62909	4.67008	0.66	2.13	0	0.64	0.66	0.66	2.77	Hodell et al., 2001	C.mundulus or C.wuellerstorfi
162-982B-13H-3-W 125	114.25	125.79	125.79	4.6346	4.6346	4.67302	0.78	2.14	0	0.64	0.78	0.78	2.78	Hodell et al., 2001	C.mundulus or C.wuellerstorfi
162-982B-13H-4-W 5	114.55	126.09	126.09	4.64287	4.64287	4.67743	0.47	1.97	0	0.64	0.47	0.47	2.61	Hodell et al., 2001	C.mundulus or C.wuellerstorfi
162-982B-13H-4-W 25	114.75	126.29	126.29	4.64839	4.64839	4.68037	0.62	1.97	0	0.64	0.62	0.62	2.61	Hodell et al., 2001	C.mundulus or C.wuellerstorfi
162-982B-13H-4-W 45	114.95	126.49	126.49	4.6539	4.6539	4.68331	0.52	2.03	0	0.64	0.52	0.52	2.67	Hodell et al., 2001	C.mundulus or C.wuellerstorfi
162-982B-13H-4-W 65	115.15	126.69	126.69	4.65941	4.65941	4.68625	0.55	2.14	0	0.64	0.55	0.55	2.78	Hodell et al., 2001	C.mundulus or C.wuellerstorfi
162-982B-13H-4-W 85	115.35	126.89	126.89	4.66492	4.66492	4.68919	0.51	2	0	0.64	0.51	0.51	2.64	Hodell et al., 2001	C.mundulus or C.wuellerstorfi
162-982B-13H-4-W 105	115.55	127.09	127.09	4.67044	4.67044	4.69213	0.5	2.08	0	0.64	0.5	0.5	2.72	Hodell et al., 2001	C.mundulus or C.wuellerstorfi
162-982B-13H-4-W 125	115.75	127.29	127.29	4.67595	4.67595	4.69507	0.42	1.91	0	0.64	0.42	0.42	2.55	Hodell et al., 2001	C.mundulus or C.wuellerstorfi
162-982B-13H-4-W 145	115.95	127.49	127.49	4.68146	4.68146	4.69801	0.44	2.04	0	0.64	0.44	0.44	2.68	Hodell et al., 2001	C.mundulus or C.wuellerstorfi
162-982B-13H-5-W 15	116.15	127.69	127.69	4.68698	4.68698	4.70095	0.46	2.17	0	0.64	0.46	0.46	2.81	Hodell et al., 2001	C.mundulus or C.wuellerstorfi
162-982B-13H-5-W 35	116.35	127.89	127.89	4.69249	4.69249	4.70389	0.56	2.22	0	0.64	0.56	0.56	2.86	Hodell et al., 2001	C.mundulus or C.wuellerstorfi
162-982B-13H-5-W 55	116.55	128.09	128.09	4.698	4.698	4.70683	0.39	2.28	0	0.64	0.39	0.39	2.92	Hodell et al., 2001	C.mundulus or C.wuellerstorfi
162-982B-13H-5-W 75	116.75	128.29	128.29	4.7014	4.70172	4.69722	0.62	2.23	0	0.64	0.62	0.62	2.87	Hodell et al., 2001	C.mundulus or C.wuellerstorfi
162-982B-13H-5-W 95	116.95	128.49	128.49	4.7048	4.70545	4.70143	0.64	2.14	0	0.64	0.64	0.64	2.78	Hodell et al., 2001	C.mundulus or C.wuellerstorfi
162-982B-13H-5-W 115	117.15	128.69	128.69	4.7082	4.70917	4.70565	0.92	2.09	0	0.64	0.92	0.92	2.73	Hodell et al., 2001	C.mundulus or C.wuellerstorfi
162-982B-13H-5-W 135	117.35	128.89	128.89	4.71161	4.7129	4.70986	0.64	2.03	0	0.64	0.64	0.64	2.67	Hodell et al., 2001	C.mundulus or C.wuellerstorfi
162-982B-13H-6-W 5	117.55	129.09	129.09	4.71501	4.71662	4.71408	0.63	2.07	0	0.64	0.63	0.63	2.71	Hodell et al., 2001	C.mundulus or C.wuellerstorfi
162-982B-13H-6-W 25	117.75	129.29	129.29	4.71841	4.72034	4.71829	0.57	2.12	0	0.64	0.57	0.57	2.76	Hodell et al., 2001	C.mundulus or C.wuellerstorfi
162-982B-13H-6-W 45	117.95	129.49	129.49	4.72181	4.72407	4.72251	0.54	2.28	0	0.64	0.54	0.54	2.92	Hodell et al., 2001	C.mundulus or C.wuellerstorfi
162-982B-13H-6-W 65	118.15	129.69	129.69	4.72521	4.72779	4.72673	0.29	2.34	0	0.64	0.29	0.29	2.98	Hodell et al., 2001	C.mundulus or C.wuellerstorfi
162-982B-13H-6-W 73	118.23	129.77	129.77	4.72657	4.72928	4.72841	0.33	2.28	0	0.64	0.33	0.33	2.92	Hodell et al., 2001	C.mundulus or C.wuellerstorfi
162-982A-13H-2-W 85	115.05	129.97	129.87	4.72827	4.73114	4.73263	0.46	2.3	0	0.64	0.46	0.46	2.94	Hodell et al., 2001	C.mundulus or C.wuellerstorfi
162-982A-13H-2-W 105	115.25	130.17	130.07	4.73168	4.73487	4.73684	0.74	2.27	0	0.64	0.74	0.74	2.91	Hodell et al., 2001	C.mundulus or C.wuellerstorfi
162-982A-13H-2-W 125	115.45	130.37	130.27	4.73508	4.73859	4.74106	0.75	2.19	0	0.64	0.75	0.75	2.83	Hodell et al., 2001	C.mundulus or C.wuellerstorfi
162-982A-13H-2-W 145	115.65	130.57	130.47	4.73848	4.74231	4.74527	0.86	2.31	0	0.64	0.86	0.86	2.95	Hodell et al., 2001	C.mundulus or C.wuellerstorfi
162-982A-13H-3-W 15	115.85	130.77	130.67	4.74188	4.74604	4.74949	0.86	2.16	0	0.64	0.86	0.86	2.8	Hodell et al., 2001	C.mundulus or C.wuellerstorfi
162-982A-13H-3-W 35	116.05	130.97	130.87	4.74528	4.74976	4.75371	0.43	2.17	0	0.64	0.43	0.43	2.81	Hodell et al., 2001	C.mundulus or C.wuellerstorfi
162-982A-13H-3-W 75	116.45	131.37	131.27	4.75208	4.75721	4.76214	0.73	2.16	0	0.64	0.73	0.73	2.8	Hodell et al., 2001	C.mundulus or C.wuellerstorfi
162-982A-13H-3-W 85	116.55	131.47	131.37	4.75379	4.75907	4.76425	0.72	2.17	0	0.64	0.72	0.72	2.81	Hodell et al., 2001	C.mundulus or C.wuellerstorfi
162-982A-13H-3-W 95	116.65	131.57	131.47	4.75549	4.76093	4.76635	0.77	2.04	0	0.64	0.77	0.77	2.68	Hodell et al., 2001	C.mundulus or C.wuellerstorfi
162-982A-13H-3-W 115	116.85	131.77	131.67	4.75889	4.76466	4.77057	0.66	2.27	0	0.64	0.66	0.66	2.91	Hodell et al., 2001	C.mundulus or C.wuellerstorfi
162-982A-13H-3-W 125	116.95	131.87	131.77	4.76059	4.76652	4.77268	0.34	2.29	0	0.64	0.34	0.34	2.93	Hodell et al., 2001	C.mundulus or C.wuellerstorfi
162-982A-13H-4-W 5	117.25	132.17	132.07	4.76569	4.7721	4.779	0.3	2.46	0	0.64	0.3	0.3	3.1	Hodell et al., 2001	C.mundulus or C.wuellerstorfi
162-982A-13H-4-W 25	117.45	132.37	132.27	4.76909	4.77583	4.77571	0.26	2.4	0	0.64	0.26	0.26	3.04	Hodell et al., 2001	C.mundulus or C.wuellerstorfi
162-982A-13H-4-W 45	117.65	132.57	132.47	4.77249	4.77955	4.77932	0.54	2.36	0	0.64	0.54	0.54	3	Hodell et al., 2001	C.mundulus or C.wuellerstorfi
162-982A-13H-4-W 65	117.85	132.77	132.67	4.7759	4.78328	4.78292	0.77	2.29	0	0.64	0.77	0.77	2.93	Hodell et al., 2001	C.mundulus or C.wuellerstorfi
162-982A-13H-4-W 85	118.05	132.97	132.87	4.7793	4.787	4.78653	0.67	2.28	0	0.64	0.67	0.67	2.92	Hodell et al., 2001	C.mundulus or C.wuellerstorfi
162-982A-13H-4-W 105	118.25	133.17	133.07	4.7827	4.79072	4.79013	0.87	2.3	0	0.64	0.87	0.87	2.94	Hodell et al., 2001	C.mundulus or C.wuellerstorfi
162-982B-14H-1-W 145	120.95	133.55	133.45	4.78916	4.7978	4.79698	0.87	2.21	0	0.64	0.87	0.87	2.85	Hodell et al., 2001	C.mundulus or C.wuellerstorfi
162-982B-14H-2-W 15	121.15	133.75	133.65	4.79256	4.80152	4.80058	0.8	2.16	0	0.64	0.8	0.8	2.8	Hodell et al., 2001	C.mundulus or C.wuellerstorfi
162-982B-14H-2-W 35	121.35	133.95	133.85	4.79597	4.80525	4.80419	0.56	2.17	0	0.64	0.56	0.56	2.81	Hodell et al., 2001	C.mundulus or C.wuellerstorfi
162-982B-14H-2-W 55	121.55	134.15	134.05	4.79937	4.80897	4.80779	0.68	2.15	0	0.64	0.68	0.68	2.79	Hodell et al., 2001	C.mundulus or C.wuellerstorfi
162-982B-14H-2-W 75	121.75	134.35	134.25	4.80277	4.81269	4.8114	0.78	2.3	0	0.64	0.78	0.78	2.94	Hodell et al., 2001	C.mundulus or C.wuellerstorfi
162-982B-14H-2-W 95	121.95	134.55	134.45	4.80617	4.81642	4.815	0.65	2.28	0	0.64	0.65	0.65	2.92	Hodell et al., 2001	C.mundulus or C.wuellerstorfi
162-982B-14H-2-W 115	122.15	134.75	134.65	4.80957	4.82014	4.82097	0.76	2.34	0	0.64	0.76	0.76	2.98	Hodell et al., 2001	C.mundulus or C.wuellerstorfi
162-982B-14H-2-W 135	122.35	134.95	134.85	4.81297	4.82387	4.82695	0.58	2.28	0	0.64	0.58	0.58	2.92	Hodell et al., 2001	C.mundulus or C.wuellerstorfi
162-982B-14H-3-W 5	122.55	135.15	135.05	4.81637	4.82759	4.83292	0.84	2.13	0	0.64	0.84	0.84	2.77	Hodell et al., 2001	C.mundulus or C.wuellerstorfi
162-982B-14H-3-W 25	122.75	135.35	135.25	4.81978	4.83131	4.83846	0.84	2.15	0	0.64	0.84	0.84	2.79	Hodell et al., 2001	C.mundulus or C.wuellerstorfi
162-982B-14H-3-W 45	122.95	135.55	135.45	4.82318	4.83504	4.84155	0.81	2.09	0	0.64	0.81	0.81	2.73	Hodell et al., 2001	C.mundulus or C.wuellerstorfi
162-982B-14H-3-W 65	123.15	135.75	135.65	4.82658	4.83876	4.84464	0.67	2.12	0	0.64	0.67	0.67	2.76	Hodell et al., 2001	C.mundulus or C.wuellerstorfi
162-982B-14H-3-W 85	123.35	135.95	135.85	4.82998	4.84249	4.84773	0.79	2.31	0	0.64	0.79	0.79	2.95	Hodell et al., 2001	C.mundulus or C.wuellerstorfi
162-982B-14H-3-W 105	123.55	136.15	136.05	4.83338	4.84621	4.85082	0.48	2.34	0	0.64	0.48	0.48	2.98	Hodell et al., 2001	C.mundulus or C.wuellerstorfi
162-982B-14H-3-W 125	123.75	136.35	136.25	4.83678	4.84993	4.85391	0.54	2.41	0	0.64	0.54	0.54	3.05	Hodell et al., 2001	C.mundulus or C.wuellerstorfi
162-982B-14H-3-W 145	123.95	136.55	136.45	4.84019	4.85366	4.857	0.54	2.42	0	0.64	0.54	0.54	3.06	Hodell et al., 2001	C.mundulus or C.wuellerstorfi
162-982B-14H-4-W 15	124.15	136.75	136.65	4.84359	4.85738	4.85993	0.62	2.26	0	0.64	0.62	0.62	2.9	Hodell et al., 2001	C.mundulus or C.wuellerstorfi
162-982B-14H-4-W 35	124.35	136.95	136.85	4.84699	4.8611	4.86286	0.8	2.21	0	0.64	0.8	0.8	2.85	Hodell et al., 2001	C.mundulus or C.wuellerstorfi
162-982B-14H-4-W 55	124.55	137.15	137.05	4.85039	4.86483	4.86579	1.03	2.11	0	0.64	1.03	1.03	2.75	Hodell et al., 2001	C.mundulus or C.wuellerstorfi
162-982B-14H-4-W 75	124.75	137.35	137.25	4.85379	4.86855	4.86871	0.9	2.17	0	0.64	0.9	0.9	2.81	Hodell et al., 2001	C.mundulus or C.wuellerstorfi
162-982B-14H-4-W 95	124.95	137.55	137.45	4.85719	4.87228	4.87164	0.88	2.05	0	0.64	0.88	0.88	2.69	Hodell et al., 2001	C.mundulus or C.wuellerstorfi
162-982B-14H-4-W 115	125.15	137.75	137.65	4.8606	4.876	4.87457	0.98	1.99	0	0.64	0.98	0.98	2.63	Hodell et al., 2001	C.mundulus or C.wuellerstorfi
162-982B-14H-4-W 135	125.35	137.95	137.85	4.864	4.87842	4.8775	0.93	2.06	0	0.64	0.93	0.93	2.7	Hodell et al., 2001	C.mundulus or C.wuellerstorfi
162-982B-14H-5-W 5	125.55	138.15	138.05	4.8674	4.88084	4.88043	0.79	2.1	0	0.64	0.79	0.79	2.74	Hodell et al., 2001	C.mundulus or C.wuellerstorfi
162-982B-14H-5-W 25	125.75	138.35	138.25	4.8708	4.88326	4.88336	0.82	2.09	0	0.64	0.82	0.82	2.73	Hodell et al., 2001	C.mundulus or C.wuellerstorfi
162-982B-14H-5-W 45	125.95	138.55	138.45	4.8742	4.88568	4.88629	0.71	2.12	0	0.64	0.71	0.71	2.76	Hodell et al., 2001	C.mundulus or C.wuellerstorfi
162-982B-14H-5-W 65	126.15	138.75	138.65	4.8776	4.8881	4.88921	0.73	2.35	0	0.64	0.73	0.73	2.99	Hodell et al., 2001	C.mundulus or C.wuellerstorfi
162-982B-14H-5-W 105	126.55	139.15	139.05	4.88441	4.89294	4.89507	0.37	2.65	0	0.64	0.37	0.37	3.29	Hodell et al., 2001	C.mundulus or C.wuellerstorfi
162-982B-14H-5-W 125	126.75	139.35	139.25	4.88781	4.89536	4.898	0.29	2.68	0	0.64	0.29	0.29	3.32	Hodell et al., 2001	C.mundulus or C.wuellerstorfi
162-982B-14H-5-W 145	126.95	139.55	139.45	4.89121	4.89778	4.9002	0.48	2.62	0	0.64	0.48	0.48	3.26	Hodell et al., 2001	C.mundulus or C.wuellerstorfi
162-982B-14H-6-W 15	127.15	139.75	139.65	4.89461	4.9002	4.90241	-0.06	2.56	0	0.64	-0.06	-0.06	3.2	Hodell et al., 2001	C.mundulus or C.wuellerstorfi
162-982B-14H-6-W 35	127.35	139.95	139.85	4.89801	4.90262	4.90461	0.19	2.41	0	0.64	0.19	0.19	3.05	Hodell et al., 2001	C.mundulus or C.wuellerstorfi
162-982B-14H-6-W 55	127.55	140.15	140.05	4.90141	4.90504	4.90682	0.5	2.23	0	0.64	0.5	0.5	2.87	Hodell et al., 2001	C.mundulus or C.wuellerstorfi
162-982B-14H-6-W 75	127.75	140.35	140.25	4.90482	4.90746	4.90902	0.5	2.11	0	0.64	0.5	0.5	2.75	Hodell et al., 2001	C.mundulus or C.wuellerstorfi
162-982B-14H-6-W 95	127.95	140.55	140.45	4.90822	4.90989	4.91123	0.7	2.18	0	0.64	0.7	0.7	2.82	Hodell et al., 2001	C.mundulus or C.wuellerstorfi
162-982B-14H-7-W 5	128.15	140.75	140.65	4.91162	4.91231	4.91375	0.69	2.1	0	0.64	0.69	0.69	2.74	Hodell et al., 2001	C.mundulus or C.wuellerstorfi
162-982C-15H-1-W 57	127.87	140.95	140.79	4.914	4.914	4.91643	0.73	2.02	0	0.64	0.73	0.73	2.66	Hodell et al., 2001	C.mundulus or C.wuellerstorfi
162-982C-15H-1-W 65	127.95	141.03	140.87	4.91534	4.9152	4.91751	0.78	2.14	0	0.64	0.78	0.78	2.78	Hodell et al., 2001	C.mundulus or C.wuellerstorfi
162-982C-15H-1-W 85	128.15	141.23	141.07	4.91869	4.91821	4.9202	0.8	2.12	0	0.64	0.8	0.8	2.76	Hodell et al., 2001	C.mundulus or C.wuellerstorfi
162-982C-15H-1-W 105	128.35	141.43	141.27	4.92204	4.92122	4.92288	0.77	2.14	0	0.64	0.77	0.77	2.78	Hodell et al., 2001	C.mundulus or C.wuellerstorfi
162-982C-15H-1-W 125	128.55	141.63	141.47	4.92539	4.92423	4.92557	0.79	2.1	0	0.64	0.79	0.79	2.74	Hodell et al., 2001	C.mundulus or C.wuellerstorfi
162-982C-15H-1-W 145	128.75	141.83	141.67	4.92874	4.92723	4.92826	0.85	2.09	0	0.64	0.85	0.85	2.73	Hodell et al., 2001	C.mundulus or C.wuellerstorfi
162-982C-15H-2-W 15	128.95	142.03	141.87	4.93208	4.93024	4.93095	0.71	2.07	0	0.64	0.71	0.71	2.71	Hodell et al., 2001	C.mundulus or C.wuellerstorfi
162-982C-15H-2-W 35	129.15	142.23	142.07	4.93543	4.93325	4.93363	0.43	2.21	0	0.64	0.43	0.43	2.85	Hodell et al., 2001	C.mundulus or C.wuellerstorfi
162-982C-15H-2-W 55	129.35	142.43	142.27	4.93878	4.93626	4.93632	0.58	2.12	0	0.64	0.58	0.58	2.76	Hodell et al., 2001	C.mundulus or C.wuellerstorfi
162-982C-15H-2-W 75	129.55	142.63	142.47	4.94213	4.93926	4.93901	0.55	2.18	0	0.64	0.55	0.55	2.82	Hodell et al., 2001	C.mundulus or C.wuellerstorfi
162-982C-15H-2-W 95	129.75	142.83	142.67	4.94548	4.94227	4.9417	0.59	2.21	0	0.64	0.59	0.59	2.85	Hodell et al., 2001	C.mundulus or C.wuellerstorfi
162-982C-15H-2-W 115	129.95	143.03	142.87	4.94883	4.94528	4.94438	0.37	2.27	0	0.64	0.37	0.37	2.91	Hodell et al., 2001	C.mundulus or C.wuellerstorfi
162-982C-15H-2-W 135	130.15	143.23	143.07	4.95218	4.94829	4.93997	0.5	2.26	0	0.64	0.5	0.5	2.9	Hodell et al., 2001	C.mundulus or C.wuellerstorfi
162-982B-15H-1-W 57	129.57	143.63	143.27	4.95553	4.95129	4.94791	0.69	1.91	0	0.64	0.69	0.69	2.55	Hodell et al., 2001	C.mundulus or C.wuellerstorfi
162-982C-15H-3-W 5	130.35	143.43	143.27	4.95553	4.95129	4.94394	0.59	2.05	0	0.64	0.59	0.59	2.69	Hodell et al., 2001	C.mundulus or C.wuellerstorfi
162-982B-15H-1-W 75	129.75	143.81	143.45	4.95854	4.954	4.95149	0.66	2.07	0	0.64	0.66	0.66	2.71	Hodell et al., 2001	C.mundulus or C.wuellerstorfi
162-982B-15H-1-W 95	129.95	144.01	143.65	4.96189	4.9575	4.95546	0.55	2.01	0	0.64	0.55	0.55	2.65	Hodell et al., 2001	C.mundulus or C.wuellerstorfi
162-982B-15H-1-W 115	130.15	144.21	143.85	4.96524	4.961	4.95943	0.53	2.26	0	0.64	0.53	0.53	2.9	Hodell et al., 2001	C.mundulus or C.wuellerstorfi
162-982B-15H-1-W 135	130.35	144.41	144.05	4.96859	4.9645	4.9634	0.21	2.01	0	0.64	0.21	0.21	2.65	Hodell et al., 2001	C.mundulus or C.wuellerstorfi
162-982B-15H-2-W 5	130.55	144.61	144.25	4.97194	4.968	4.96737	0.42	1.99	0	0.64	0.42	0.42	2.63	Hodell et al., 2001	C.mundulus or C.wuellerstorfi
162-982B-15H-2-W 25	130.75	144.81	144.45	4.97528	4.9715	4.97134	0.7	1.94	0	0.64	0.7	0.7	2.58	Hodell et al., 2001	C.mundulus or C.wuellerstorfi
162-982B-15H-2-W 45	130.95	145.01	144.65	4.97863	4.975	4.97532	0.84	2.07	0	0.64	0.84	0.84	2.71	Hodell et al., 2001	C.mundulus or C.wuellerstorfi
162-982B-15H-2-W 65	131.15	145.21	144.85	4.98198	4.97869	4.97929	0.83	2	0	0.64	0.83	0.83	2.64	Hodell et al., 2001	C.mundulus or C.wuellerstorfi
162-982B-15H-2-W 85	131.35	145.41	145.05	4.98533	4.98238	4.98326	0.97	2.18	0	0.64	0.97	0.97	2.82	Hodell et al., 2001	C.mundulus or C.wuellerstorfi
162-982B-15H-2-W 115	131.65	145.71	145.35	4.99035	4.98792	4.98922	0.87	1.98	0	0.64	0.87	0.87	2.62	Hodell et al., 2001	C.mundulus or C.wuellerstorfi
162-982B-15H-2-W 135	131.85	145.91	145.55	4.9937	4.99162	4.99319	1.11	1.97	0	0.64	1.11	1.11	2.61	Hodell et al., 2001	C.mundulus or C.wuellerstorfi
162-982B-15H-3-W 5	132.05	146.11	145.75	4.99705	4.99531	4.99716	0.87	1.94	0	0.64	0.87	0.87	2.58	Hodell et al., 2001	C.mundulus or C.wuellerstorfi
162-982B-15H-3-W 25	132.25	146.31	145.95	5.0004	4.999	5.00113	0.76	2.02	0	0.64	0.76	0.76	2.66	Hodell et al., 2001	C.mundulus or C.wuellerstorfi
162-982B-15H-3-W 45	132.45	146.51	146.15	5.00375	5.00174	5.0051	0.63	1.96	0	0.64	0.63	0.63	2.6	Hodell et al., 2001	C.mundulus or C.wuellerstorfi
162-982B-15H-3-W 65	132.65	146.71	146.35	5.0071	5.00448	5.00907	0.7	2.01	0	0.64	0.7	0.7	2.65	Hodell et al., 2001	C.mundulus or C.wuellerstorfi
162-982B-15H-3-W 85	132.85	146.91	146.55	5.01045	5.00722	5.01304	0.57	2.2	0	0.64	0.57	0.57	2.84	Hodell et al., 2001	C.mundulus or C.wuellerstorfi
162-982B-15H-3-W 115	133.15	147.21	146.85	5.01547	5.01133	5.019	0.39	2.3	0	0.64	0.39	0.39	2.94	Hodell et al., 2001	C.mundulus or C.wuellerstorfi
162-982B-15H-3-W 145	133.45	147.51	147.15	5.02049	5.01544	5.02321	0.24	2.27	0	0.64	0.24	0.24	2.91	Hodell et al., 2001	C.mundulus or C.wuellerstorfi
162-982B-15H-4-W 15	133.65	147.71	147.35	5.02384	5.01819	5.02601	0.43	2.2	0	0.64	0.43	0.43	2.84	Hodell et al., 2001	C.mundulus or C.wuellerstorfi
162-982B-15H-4-W 35	133.85	147.91	147.55	5.02719	5.02093	5.02881	0.46	2.09	0	0.64	0.46	0.46	2.73	Hodell et al., 2001	C.mundulus or C.wuellerstorfi
162-982B-15H-4-W 55	134.05	148.11	147.75	5.03054	5.02367	5.03162	0.76	1.97	0	0.64	0.76	0.76	2.61	Hodell et al., 2001	C.mundulus or C.wuellerstorfi
162-982B-15H-4-W 75	134.25	148.31	147.95	5.03389	5.02641	5.03442	0.75	2.07	0	0.64	0.75	0.75	2.71	Hodell et al., 2001	C.mundulus or C.wuellerstorfi
162-982B-15H-4-W 105	134.55	148.61	148.25	5.03891	5.03052	5.03863	0.66	2	0	0.64	0.66	0.66	2.64	Hodell et al., 2001	C.mundulus or C.wuellerstorfi
162-982B-15H-4-W 125	134.75	148.81	148.45	5.04226	5.03326	5.04143	0.73	1.9	0	0.64	0.73	0.73	2.54	Hodell et al., 2001	C.mundulus or C.wuellerstorfi
162-982B-15H-4-W 145	134.95	149.01	148.65	5.04561	5.036	5.04424	0.88	2.02	0	0.64	0.88	0.88	2.66	Hodell et al., 2001	C.mundulus or C.wuellerstorfi
162-982B-15H-5-W 15	135.15	149.21	148.85	5.04896	5.0386	5.04704	0.87	1.97	0	0.64	0.87	0.87	2.61	Hodell et al., 2001	C.mundulus or C.wuellerstorfi
162-982B-15H-5-W 35	135.35	149.41	149.05	5.05231	5.04119	5.04984	0.82	1.94	0	0.64	0.82	0.82	2.58	Hodell et al., 2001	C.mundulus or C.wuellerstorfi
162-982B-15H-5-W 55	135.55	149.61	149.25	5.05566	5.04379	5.05265	0.78	2.04	0	0.64	0.78	0.78	2.68	Hodell et al., 2001	C.mundulus or C.wuellerstorfi
162-982B-15H-5-W 75	135.75	149.81	149.45	5.05901	5.04638	5.05545	0.7	1.82	0	0.64	0.7	0.7	2.46	Hodell et al., 2001	C.mundulus or C.wuellerstorfi
162-982B-15H-5-W 105	136.05	150.11	149.75	5.06403	5.05028	5.05966	0.67	1.96	0	0.64	0.67	0.67	2.6	Hodell et al., 2001	C.mundulus or C.wuellerstorfi
162-982B-15H-5-W 125	136.25	150.31	149.95	5.06738	5.05287	5.06246	0.63	2.1	0	0.64	0.63	0.63	2.74	Hodell et al., 2001	C.mundulus or C.wuellerstorfi
162-982B-15H-5-W 145	136.45	150.51	150.15	5.07073	5.05547	5.06527	0.49	2.27	0	0.64	0.49	0.49	2.91	Hodell et al., 2001	C.mundulus or C.wuellerstorfi
162-982A-15H-2-W 23	133.43	150.71	150.42	5.07525	5.05897	5.05884	0.35	2.2	0	0.64	0.35	0.35	2.84	Hodell et al., 2001	C.mundulus or C.wuellerstorfi
162-982A-15H-2-W 43	133.63	150.91	150.62	5.0786	5.06157	5.06267	0.37	2.14	0	0.64	0.37	0.37	2.78	Hodell et al., 2001	C.mundulus or C.wuellerstorfi
162-982A-15H-2-W 65	133.85	151.13	150.84	5.08228	5.06442	5.06689	0.54	2.03	0	0.64	0.54	0.54	2.67	Hodell et al., 2001	C.mundulus or C.wuellerstorfi
162-982A-15H-2-W 85	134.05	151.33	151.04	5.08563	5.06702	5.07073	0.63	2.02	0	0.64	0.63	0.63	2.66	Hodell et al., 2001	C.mundulus or C.wuellerstorfi
162-982A-15H-2-W 105	134.25	151.53	151.24	5.08898	5.06962	5.07457	0.56	2.02	0	0.64	0.56	0.56	2.66	Hodell et al., 2001	C.mundulus or C.wuellerstorfi
162-982A-15H-2-W 125	134.45	151.73	151.44	5.09233	5.07221	5.0784	0.85	2.06	0	0.64	0.85	0.85	2.7	Hodell et al., 2001	C.mundulus or C.wuellerstorfi
162-982A-15H-2-W 145	134.65	151.93	151.64	5.09568	5.07481	5.08224	0.94	1.92	0	0.64	0.94	0.94	2.56	Hodell et al., 2001	C.mundulus or C.wuellerstorfi
162-982A-15H-3-W 15	134.85	152.13	151.84	5.09903	5.0774	5.08607	0.94	2.03	0	0.64	0.94	0.94	2.67	Hodell et al., 2001	C.mundulus or C.wuellerstorfi
162-982A-15H-3-W 35	135.05	152.33	152.04	5.10238	5.08	5.08991	0.82	2.2	0	0.64	0.82	0.82	2.84	Hodell et al., 2001	C.mundulus or C.wuellerstorfi
162-982A-15H-3-W 55	135.25	152.53	152.24	5.10572	5.08422	5.09375	0.65	2.05	0	0.64	0.65	0.65	2.69	Hodell et al., 2001	C.mundulus or C.wuellerstorfi
162-982A-15H-3-W 75	135.45	152.73	152.44	5.10907	5.08844	5.09758	0.43	2.14	0	0.64	0.43	0.43	2.78	Hodell et al., 2001	C.mundulus or C.wuellerstorfi
162-982A-15H-3-W 95	135.65	152.93	152.64	5.11242	5.09267	5.10142	0.67	2.25	0	0.64	0.67	0.67	2.89	Hodell et al., 2001	C.mundulus or C.wuellerstorfi
162-982A-15H-3-W 115	135.85	153.13	152.84	5.11577	5.09689	5.10526	0.45	2.26	0	0.64	0.45	0.45	2.9	Hodell et al., 2001	C.mundulus or C.wuellerstorfi
162-982A-15H-3-W 135	136.05	153.33	153.04	5.11912	5.10111	5.10909	0.52	2.24	0	0.64	0.52	0.52	2.88	Hodell et al., 2001	C.mundulus or C.wuellerstorfi
162-982A-15H-4-W 7	136.25	153.53	153.24	5.12247	5.10533	5.11293	0.77	2.16	0	0.64	0.77	0.77	2.8	Hodell et al., 2001	C.mundulus or C.wuellerstorfi
162-982A-15H-4-W 27	136.45	153.73	153.44	5.12582	5.10956	5.11676	0.92	2.22	0	0.64	0.92	0.92	2.86	Hodell et al., 2001	C.mundulus or C.wuellerstorfi
162-982A-15H-4-W 47	136.65	153.93	153.64	5.12917	5.11378	5.1206	0.83	2.12	0	0.64	0.83	0.83	2.76	Hodell et al., 2001	C.mundulus or C.wuellerstorfi
162-982A-15H-4-W 67	136.85	154.13	153.84	5.13251	5.118	5.12444	0.87	1.99	0	0.64	0.87	0.87	2.63	Hodell et al., 2001	C.mundulus or C.wuellerstorfi
162-982A-15H-4-W 87	137.05	154.33	154.04	5.13586	5.12328	5.12827	0.5	1.99	0	0.64	0.5	0.5	2.63	Hodell et al., 2001	C.mundulus or C.wuellerstorfi
162-982A-15H-4-W 107	137.25	154.53	154.24	5.13921	5.12857	5.13303	0.66	2.2	0	0.64	0.66	0.66	2.84	Hodell et al., 2001	C.mundulus or C.wuellerstorfi
162-982A-15H-4-W 127	137.45	154.73	154.44	5.14256	5.13385	5.13853	0.79	2.07	0	0.64	0.79	0.79	2.71	Hodell et al., 2001	C.mundulus or C.wuellerstorfi
162-982A-15H-4-W 144	137.62	154.9	154.61	5.14541	5.13834	5.1422	0.69	1.97	0	0.64	0.69	0.69	2.61	Hodell et al., 2001	C.mundulus or C.wuellerstorfi
162-982B-16H-2-W 97	140.98	155.72	155.43	5.15914	5.16	5.159	0.71	1.82	0	0.64	0.71	0.71	2.46	Hodell et al., 2001	C.wuellerstorfi
162-982B-16H-2-W 97	140.98	155.72	155.43	5.15914	5.16	5.159	0.37	1.98	0	0.64	0.37		2.62	Hodell et al., 2001	C.mundulus
162-982B-16H-2-W 107	141.08	155.82	155.53	5.16081	5.16164	5.162	0.61	2.08	0	0.64	0.61	0.61	2.72	Hodell et al., 2001	C.wuellerstorfi
162-982B-16H-2-W 107	141.08	155.82	155.53	5.16081	5.16164	5.162	0.24	2.04	0	0.64	0.24		2.68	Hodell et al., 2001	C.mundulus
162-982B-16H-2-W 117	141.18	155.92	155.63	5.16249	5.16328	5.165	0.37	2.16	0	0.64	0.37		2.8	Hodell et al., 2001	C.mundulus
162-982B-16H-2-W 127	141.28	156.02	155.73	5.16416	5.16492	5.168	0.57	2.19	0	0.64	0.57	0.57	2.83	Hodell et al., 2001	C.wuellerstorfi
162-982B-16H-2-W 127	141.28	156.02	155.73	5.16416	5.16492	5.168	0.07	2.25	0	0.64	0.07		2.89	Hodell et al., 2001	C.mundulus
162-982B-16H-2-W 137	141.38	156.12	155.83	5.16584	5.16656	5.171	0.52	2.19	0	0.64	0.52	0.52	2.83	Hodell et al., 2001	C.wuellerstorfi
162-982B-16H-2-W 137	141.38	156.12	155.83	5.16584	5.16656	5.171	0.1	2.13	0	0.64	0.1		2.77	Hodell et al., 2001	C.mundulus
162-982B-16H-3-W 7	141.58	156.32	156.03	5.16919	5.16984	5.176	0.32	2.17	0	0.64	0.32	0.32	2.81	Hodell et al., 2001	C.wuellerstorfi
162-982B-16H-3-W 7	141.58	156.32	156.03	5.16919	5.16984	5.176	0.07	2.25	0	0.64	0.07		2.89	Hodell et al., 2001	C.mundulus
162-982B-16H-3-W 17	141.68	156.42	156.13	5.17086	5.17148	5.178	0.06	2.29	0	0.64	0.06		2.93	Hodell et al., 2001	C.mundulus
162-982B-16H-3-W 27	141.78	156.52	156.23	5.17253	5.17312	5.18	0.52	2.2	0	0.64	0.52	0.52	2.84	Hodell et al., 2001	C.wuellerstorfi
162-982B-16H-3-W 27	141.78	156.52	156.23	5.17253	5.17312	5.18	0.03	2.14	0	0.64	0.03		2.78	Hodell et al., 2001	C.mundulus
162-982B-16H-3-W 37	141.88	156.62	156.33	5.17421	5.17476	5.182	0.74	2.18	0	0.64	0.74	0.74	2.82	Hodell et al., 2001	C.wuellerstorfi
162-982B-16H-3-W 37	141.88	156.62	156.33	5.17421	5.17476	5.182	0.21	2.2	0	0.64	0.21		2.84	Hodell et al., 2001	C.mundulus
162-982B-16H-3-W 47	141.98	156.72	156.43	5.17588	5.1764	5.184	0.29	2.2	0	0.64	0.29		2.84	Hodell et al., 2001	C.mundulus
162-982B-16H-3-W 57	142.08	156.82	156.53	5.17756	5.17804	5.186	0.65	2.22	0	0.64	0.65		2.86	Hodell et al., 2001	C.mundulus
162-982B-16H-3-W 67	142.18	156.92	156.63	5.17923	5.17968	5.188	0.57	2.21	0	0.64	0.57		2.85	Hodell et al., 2001	C.mundulus
162-982B-16H-3-W 67	142.18	156.92	156.63	5.17923	5.17968	5.188	0.61	2	0	0.64	0.61	0.61	2.64	Hodell et al., 2001	C.wuellerstorfi
162-982B-16H-3-W 77	142.28	157.02	156.73	5.18091	5.18132	5.19	0.46	2.2	0	0.64	0.46		2.84	Hodell et al., 2001	C.mundulus
162-982B-16H-3-W 77	142.28	157.02	156.73	5.18091	5.18132	5.19	0.74	2.07	0	0.64	0.74	0.74	2.71	Hodell et al., 2001	C.wuellerstorfi
162-982B-16H-3-W 87	142.38	157.12	156.83	5.18258	5.18296	5.192	0.54	2.1	0	0.64	0.54	0.54	2.74	Hodell et al., 2001	C.wuellerstorfi
162-982B-16H-3-W 87	142.38	157.12	156.83	5.18258	5.18296	5.192	0.52	2.21	0	0.64	0.52		2.85	Hodell et al., 2001	C.mundulus
162-982B-16H-3-W 97	142.48	157.22	156.93	5.18426	5.1846	5.194	0.67	1.91	0	0.64	0.67	0.67	2.55	Hodell et al., 2001	C.wuellerstorfi
162-982B-16H-3-W 97	142.48	157.22	156.93	5.18426	5.1846	5.194	0.46	2.02	0	0.64	0.46		2.66	Hodell et al., 2001	C.mundulus
162-982B-16H-3-W 107	142.58	157.32	157.03	5.18593	5.18624	5.196	0.73	2.12	0	0.64	0.73		2.76	Hodell et al., 2001	C.mundulus
162-982B-16H-3-W 107	142.58	157.32	157.03	5.18593	5.18624	5.196	0.81	2.07	0	0.64	0.81	0.81	2.71	Hodell et al., 2001	C.wuellerstorfi
162-982B-16H-3-W 117	142.68	157.42	157.13	5.1876	5.18788	5.198	0.59	2.12	0	0.64	0.59		2.76	Hodell et al., 2001	C.mundulus
162-982B-16H-3-W 117	142.68	157.42	157.13	5.1876	5.18788	5.198	0.84	1.97	0	0.64	0.84	0.84	2.61	Hodell et al., 2001	C.wuellerstorfi
162-982B-16H-3-W 127	142.78	157.52	157.23	5.18928	5.18952	5.19957	0.87	2.03	0	0.64	0.87	0.87	2.67	Hodell et al., 2001	C.wuellerstorfi
162-982B-16H-3-W 127	142.78	157.52	157.23	5.18928	5.18952	5.19957	0.58	2.03	0	0.64	0.58		2.67	Hodell et al., 2001	C.mundulus
162-982B-16H-3-W 137	142.88	157.62	157.33	5.19095	5.19116	5.20114	0.45	1.97	0	0.64	0.45		2.61	Hodell et al., 2001	C.mundulus
162-982B-16H-3-W 147	142.98	157.72	157.43	5.19263	5.1928	5.20271	0.54	2.09	0	0.64	0.54		2.73	Hodell et al., 2001	C.mundulus
162-982B-16H-4-W 7	143.08	157.82	157.53	5.1943	5.19444	5.20429	0.48	2.08	0	0.64	0.48		2.72	Hodell et al., 2001	C.mundulus
162-982B-16H-4-W 17	143.18	157.92	157.63	5.19598	5.19608	5.20586	0.65	2.23	0	0.64	0.65		2.87	Hodell et al., 2001	C.mundulus
162-982B-16H-4-W 27	143.28	158.02	157.73	5.19765	5.19772	5.20743	0.9	1.96	0	0.64	0.9	0.9	2.6	Hodell et al., 2001	C.wuellerstorfi
162-982B-16H-4-W 27	143.28	158.02	157.73	5.19765	5.19772	5.20743	0.46	2.1	0	0.64	0.46		2.74	Hodell et al., 2001	C.mundulus
162-982B-16H-4-W 37	143.38	158.12	157.83	5.19933	5.19936	5.209	0.77	2.01	0	0.64	0.77	0.77	2.65	Hodell et al., 2001	C.wuellerstorfi
162-982B-16H-4-W 37	143.38	158.12	157.83	5.19933	5.19936	5.209	0.51	2.14	0	0.64	0.51		2.78	Hodell et al., 2001	C.mundulus
162-982B-16H-4-W 47	143.48	158.22	157.93	5.201	5.201	5.21057	0.59	2.07	0	0.64	0.59		2.71	Hodell et al., 2001	C.mundulus
162-982B-16H-4-W 57	143.58	158.32	158.03	5.20326	5.20326	5.21214	-0.16	2.19	0	0.64	-0.16		2.83	Hodell et al., 2001	C.mundulus
162-982B-16H-4-W 67	143.68	158.42	158.13	5.20551	5.20551	5.21371	0.42	2.19	0	0.64	0.42		2.83	Hodell et al., 2001	C.mundulus
162-982B-16H-4-W 77	143.78	158.52	158.23	5.20777	5.20777	5.21529	0.4	2.18	0	0.64	0.4		2.82	Hodell et al., 2001	C.mundulus
162-982B-16H-4-W 87	143.88	158.62	158.33	5.21002	5.21002	5.21686	0.46	2.14	0	0.64	0.46		2.78	Hodell et al., 2001	C.mundulus
162-982B-16H-4-W 87	143.88	158.62	158.33	5.21002	5.21002	5.21686	0.6	2.14	0	0.64	0.6	0.6	2.78	Hodell et al., 2001	C.wuellerstorfi
162-982B-16H-4-W 97	143.98	158.72	158.43	5.21228	5.21228	5.21843	0.86	2.3	0	0.64	0.86	0.86	2.94	Hodell et al., 2001	C.wuellerstorfi
162-982B-16H-4-W 97	143.98	158.72	158.43	5.21228	5.21228	5.21843	0.4	2.21	0	0.64	0.4		2.85	Hodell et al., 2001	C.mundulus
162-982B-16H-4-W 107	144.08	158.82	158.53	5.21453	5.21453	5.22	0.67	2.27	0	0.64	0.67	0.67	2.91	Hodell et al., 2001	C.wuellerstorfi
162-982B-16H-4-W 117	144.18	158.92	158.63	5.21679	5.21679	5.2208	0.73	2.19	0	0.64	0.73	0.73	2.83	Hodell et al., 2001	C.wuellerstorfi
162-982B-16H-4-W 117	144.18	158.92	158.63	5.21679	5.21679	5.2208	0.18	2.23	0	0.64	0.18		2.87	Hodell et al., 2001	C.mundulus
162-982B-16H-4-W 127	144.28	159.02	158.73	5.21905	5.21905	5.2216	-0.41	2.3	0	0.64	-0.41		2.94	Hodell et al., 2001	C.mundulus
162-982B-16H-4-W 137	144.38	159.12	158.83	5.2213	5.2213	5.22239	0.09	2.24	0	0.64	0.09		2.88	Hodell et al., 2001	C.mundulus
162-982B-16H-4-W 137	144.38	159.12	158.83	5.2213	5.2213	5.22239	0.44	2.07	0	0.64	0.44	0.44	2.71	Hodell et al., 2001	C.wuellerstorfi
162-982B-16H-4-W 147	144.48	159.22	158.93	5.22356	5.22356	5.22319	0.47	2.02	0	0.64	0.47	0.47	2.66	Hodell et al., 2001	C.wuellerstorfi
162-982B-16H-4-W 147	144.48	159.22	158.93	5.22356	5.22356	5.22319	0.08	2.16	0	0.64	0.08		2.8	Hodell et al., 2001	C.mundulus
162-982B-16H-5-W 7	144.58	159.32	159.03	5.22581	5.22581	5.22399	0.27	2.16	0	0.64	0.27		2.8	Hodell et al., 2001	C.mundulus
162-982B-16H-5-W 7	144.58	159.32	159.03	5.22581	5.22581	5.22399	0.51	2.09	0	0.64	0.51	0.51	2.73	Hodell et al., 2001	C.wuellerstorfi
162-982B-16H-5-W 17	144.68	159.42	159.13	5.22807	5.22807	5.22479	0.38	2.11	0	0.64	0.38		2.75	Hodell et al., 2001	C.mundulus
162-982B-16H-5-W 27	144.78	159.52	159.23	5.23032	5.23032	5.22559	0.4	2.04	0	0.64	0.4		2.68	Hodell et al., 2001	C.mundulus
162-982B-16H-5-W 27	144.78	159.52	159.23	5.23032	5.23032	5.22559	0.62	1.99	0	0.64	0.62	0.62	2.63	Hodell et al., 2001	C.wuellerstorfi
162-982B-16H-5-W 37	144.88	159.62	159.33	5.23258	5.23258	5.22639	0.56	1.92	0	0.64	0.56		2.56	Hodell et al., 2001	C.mundulus
162-982B-16H-5-W 37	144.88	159.62	159.33	5.23258	5.23258	5.22639	0.67	2.05	0	0.64	0.67	0.67	2.69	Hodell et al., 2001	C.wuellerstorfi
162-982B-16H-5-W 47	144.98	159.72	159.43	5.23483	5.23483	5.22718	0.85	2.03	0	0.64	0.85	0.85	2.67	Hodell et al., 2001	C.wuellerstorfi
162-982B-16H-5-W 47	144.98	159.72	159.43	5.23483	5.23483	5.22718	0.55	2.04	0	0.64	0.55		2.68	Hodell et al., 2001	C.mundulus
162-982B-16H-5-W 57	145.08	159.82	159.53	5.23709	5.23709	5.22798	0.53	1.94	0	0.64	0.53		2.58	Hodell et al., 2001	C.mundulus
162-982B-16H-5-W 57	145.08	159.82	159.53	5.23709	5.23709	5.22798	0.71	1.83	0	0.64	0.71	0.71	2.47	Hodell et al., 2001	C.wuellerstorfi
162-982B-16H-5-W 67	145.18	159.92	159.63	5.23935	5.23935	5.22878	0.72	1.94	0	0.64	0.72		2.58	Hodell et al., 2001	C.mundulus
162-982B-16H-5-W 67	145.18	159.92	159.63	5.23935	5.23935	5.22878	0.71	1.97	0	0.64	0.71	0.71	2.61	Hodell et al., 2001	C.wuellerstorfi
162-982B-16H-5-W 77	145.28	160.02	159.73	5.2416	5.2416	5.22958	0.57	2.19	0	0.64	0.57		2.83	Hodell et al., 2001	C.mundulus
162-982B-16H-5-W 77	145.28	160.02	159.73	5.2416	5.2416	5.22958	0.95	1.93	0	0.64	0.95	0.95	2.57	Hodell et al., 2001	C.wuellerstorfi
162-982B-16H-5-W 87	145.38	160.12	159.83	5.24386	5.24386	5.23038	0.71	1.94	0	0.64	0.71		2.58	Hodell et al., 2001	C.mundulus
162-982B-16H-5-W 87	145.38	160.12	159.83	5.24386	5.24386	5.23038	0.78	2.01	0	0.64	0.78	0.78	2.65	Hodell et al., 2001	C.wuellerstorfi
162-982B-16H-5-W 97	145.48	160.22	159.93	5.24611	5.24611	5.23117	0.82	1.94	0	0.64	0.82	0.82	2.58	Hodell et al., 2001	C.wuellerstorfi
162-982B-16H-5-W 97	145.48	160.22	159.93	5.24611	5.24611	5.23117	0.4	1.95	0	0.64	0.4		2.59	Hodell et al., 2001	C.mundulus
162-982B-16H-5-W 107	145.58	160.32	160.03	5.24837	5.24837	5.23197	0.89	1.9	0	0.64	0.89	0.89	2.54	Hodell et al., 2001	C.wuellerstorfi
162-982B-16H-5-W 107	145.58	160.32	160.03	5.24837	5.24837	5.23197	0.49	2.03	0	0.64	0.49		2.67	Hodell et al., 2001	C.mundulus
162-982B-16H-5-W 117	145.68	160.42	160.13	5.25062	5.25062	5.23277	0.43	2.09	0	0.64	0.43		2.73	Hodell et al., 2001	C.mundulus
162-982B-16H-5-W 117	145.68	160.42	160.13	5.25062	5.25062	5.23277	0.78	2.03	0	0.64	0.78	0.78	2.67	Hodell et al., 2001	C.wuellerstorfi
162-982B-16H-5-W 127	145.78	160.52	160.23	5.25288	5.25288	5.23357	0.24	2.2	0	0.64	0.24		2.84	Hodell et al., 2001	C.mundulus
162-982B-16H-5-W 127	145.78	160.52	160.23	5.25288	5.25288	5.23357	0.84	2.02	0	0.64	0.84	0.84	2.66	Hodell et al., 2001	C.wuellerstorfi
162-982B-16H-5-W 137	145.88	160.62	160.33	5.25514	5.25514	5.23437	0.08	2.12	0	0.64	0.08		2.76	Hodell et al., 2001	C.mundulus
162-982B-16H-5-W 137	145.88	160.62	160.33	5.25514	5.25514	5.23437	0.78	2	0	0.64	0.78	0.78	2.64	Hodell et al., 2001	C.wuellerstorfi
162-982B-16H-5-W 147	145.98	160.72	160.43	5.25739	5.25739	5.23517	0.86	1.98	0	0.64	0.86	0.86	2.62	Hodell et al., 2001	C.wuellerstorfi
162-982B-16H-5-W 147	145.98	160.72	160.43	5.25739	5.25739	5.23517	0.47	2.12	0	0.64	0.47		2.76	Hodell et al., 2001	C.mundulus
162-982B-16H-6-W 7	146.08	160.82	160.53	5.25965	5.25965	5.23596	0.27	2.2	0	0.64	0.27		2.84	Hodell et al., 2001	C.mundulus
162-982B-16H-6-W 7	146.08	160.82	160.53	5.25965	5.25965	5.23596	0.65	1.99	0	0.64	0.65	0.65	2.63	Hodell et al., 2001	C.wuellerstorfi
162-982B-16H-6-W 7	146.08	160.82	160.53	5.25965	5.25965	5.23596	0.38	1.96	0	0.64	0.38		2.6	Hodell et al., 2001	C.mundulus
162-982B-16H-6-W 7	146.08	160.82	160.53	5.25965	5.25965	5.23596	1.02	1.65	0	0.64	1.02	1.02	2.29	Hodell et al., 2001	C.wuellerstorfi
162-982B-16H-6-W 17	146.18	160.92	160.63	5.2619	5.2619	5.23676	0.52	2.04	0	0.64	0.52		2.68	Hodell et al., 2001	C.mundulus
162-982B-16H-6-W 27	146.28	161.02	160.73	5.26416	5.26416	5.23756	-0.23	2	0	0.64	-0.23		2.64	Hodell et al., 2001	C.mundulus
162-982B-16H-6-W 27	146.28	161.02	160.73	5.26416	5.26416	5.23756	0.89	1.92	0	0.64	0.89	0.89	2.56	Hodell et al., 2001	C.wuellerstorfi
162-982B-16H-6-W 37	146.38	161.12	160.83	5.26641	5.26641	5.23836	0.9	1.99	0	0.64	0.9	0.9	2.63	Hodell et al., 2001	C.wuellerstorfi
162-982B-16H-6-W 37	146.38	161.12	160.83	5.26641	5.26641	5.23836	0.45	1.94	0	0.64	0.45		2.58	Hodell et al., 2001	C.mundulus
162-982B-16H-6-W 47	146.48	161.22	160.93	5.26867	5.26867	5.23704	0.49	2	0	0.64	0.49		2.64	Hodell et al., 2001	C.mundulus
162-982B-16H-6-W 47	146.48	161.22	160.93	5.26867	5.26867	5.23704	1	2.09	0	0.64	1	1	2.73	Hodell et al., 2001	C.wuellerstorfi
162-982B-16H-6-W 57	146.58	161.32	161.03	5.27092	5.27092	5.23819	0.59	1.98	0	0.64	0.59		2.62	Hodell et al., 2001	C.mundulus
162-982B-16H-6-W 57	146.58	161.32	161.03	5.27092	5.27092	5.23819	0.99	2.02	0	0.64	0.99	0.99	2.66	Hodell et al., 2001	C.wuellerstorfi
162-982A-16H-2-W 77	143.48	161.6	161.45	5.2804	5.2804	5.24143	0.96	2.01	0	0.64	0.96		2.65	Hodell et al., 2001	C.mundulus
162-982A-16H-2-W 77	143.48	161.6	161.45	5.2804	5.2804	5.24143	1.11	2.04	0	0.64	1.11	1.11	2.68	Hodell et al., 2001	C.wuellerstorfi
162-982A-16H-2-W 87	143.58	161.7	161.55	5.28265	5.28265	5.24258	1	1.92	0	0.64	1	1	2.56	Hodell et al., 2001	C.wuellerstorfi
162-982A-16H-2-W 87	143.58	161.7	161.55	5.28265	5.28265	5.24258	0.85	2.12	0	0.64	0.85		2.76	Hodell et al., 2001	C.mundulus
162-982A-16H-2-W 97	143.68	161.8	161.65	5.28491	5.28491	5.24374	0.99	1.96	0	0.64	0.99	0.99	2.6	Hodell et al., 2001	C.wuellerstorfi
162-982A-16H-2-W 107	143.78	161.9	161.75	5.28717	5.28717	5.24489	0.9	1.94	0	0.64	0.9	0.9	2.58	Hodell et al., 2001	C.wuellerstorfi
162-982A-16H-2-W 117	143.88	162	161.85	5.28942	5.28942	5.24605	0.76	2.09	0	0.64	0.76		2.73	Hodell et al., 2001	C.mundulus
162-982A-16H-2-W 117	143.88	162	161.85	5.28942	5.28942	5.24605	0.85	1.93	0	0.64	0.85	0.85	2.57	Hodell et al., 2001	C.wuellerstorfi
162-982A-16H-2-W 127	143.98	162.1	161.95	5.29168	5.29168	5.24721	0.84	2.02	0	0.64	0.84		2.66	Hodell et al., 2001	C.mundulus
162-982A-16H-2-W 137	144.08	162.2	162.05	5.29393	5.29393	5.24836	0.79	2.02	0	0.64	0.79		2.66	Hodell et al., 2001	C.mundulus
162-982A-16H-2-W 137	144.08	162.2	162.05	5.29393	5.29393	5.24836	0.83	2	0	0.64	0.83	0.83	2.64	Hodell et al., 2001	C.wuellerstorfi
162-982A-16H-2-W 147	144.18	162.3	162.15	5.29619	5.29619	5.24952	0.8	2	0	0.64	0.8	0.8	2.64	Hodell et al., 2001	C.wuellerstorfi
162-982A-16H-2-W 147	144.18	162.3	162.15	5.29619	5.29619	5.24952	0.69	2.01	0	0.64	0.69		2.65	Hodell et al., 2001	C.mundulus
162-982A-16H-3-W 7	144.28	162.4	162.25	5.29844	5.29844	5.25067	0.41	2.07	0	0.64	0.41		2.71	Hodell et al., 2001	C.mundulus
162-982A-16H-3-W 7	144.28	162.4	162.25	5.29844	5.29844	5.25067	0.81	1.84	0	0.64	0.81	0.81	2.48	Hodell et al., 2001	C.wuellerstorfi
162-982A-16H-3-W 17	144.38	162.5	162.35	5.3007	5.3007	5.25183	0.82	1.99	0	0.64	0.82	0.82	2.63	Hodell et al., 2001	C.wuellerstorfi
162-982A-16H-3-W 17	144.38	162.5	162.35	5.3007	5.3007	5.25183	0.7	1.64	0	0.64	0.7		2.28	Hodell et al., 2001	C.mundulus
162-982A-16H-3-W 27	144.48	162.6	162.45	5.30295	5.30295	5.25298	0.51	1.93	0	0.64	0.51		2.57	Hodell et al., 2001	C.mundulus
162-982A-16H-3-W 27	144.48	162.6	162.45	5.30295	5.30295	5.25298	0.86	2.07	0	0.64	0.86	0.86	2.71	Hodell et al., 2001	C.wuellerstorfi
162-982A-16H-3-W 37	144.58	162.7	162.55	5.30521	5.30521	5.25414	0.88	1.99	0	0.64	0.88	0.88	2.63	Hodell et al., 2001	C.wuellerstorfi
162-982A-16H-3-W 37	144.58	162.7	162.55	5.30521	5.30521	5.25414	0.52	2.08	0	0.64	0.52		2.72	Hodell et al., 2001	C.mundulus
162-982A-16H-3-W 47	144.68	162.8	162.65	5.30747	5.30747	5.25529	0.94	1.99	0	0.64	0.94	0.94	2.63	Hodell et al., 2001	C.wuellerstorfi
162-982A-16H-3-W 47	144.68	162.8	162.65	5.30747	5.30747	5.25529	0.53	2.08	0	0.64	0.53		2.72	Hodell et al., 2001	C.mundulus
162-982A-16H-3-W 57	144.78	162.9	162.75	5.30972	5.30972	5.25645	0.64	2.05	0	0.64	0.64		2.69	Hodell et al., 2001	C.mundulus
162-982A-16H-3-W 57	144.78	162.9	162.75	5.30972	5.30972	5.25645	0.89	1.91	0	0.64	0.89	0.89	2.55	Hodell et al., 2001	C.wuellerstorfi
162-982A-16H-3-W 67	144.88	163	162.85	5.31198	5.31198	5.2576	1.05	2.14	0	0.64	1.05	1.05	2.78	Hodell et al., 2001	C.wuellerstorfi
162-982A-16H-3-W 67	144.88	163	162.85	5.31198	5.31198	5.2576	0.5	2.24	0	0.64	0.5		2.88	Hodell et al., 2001	C.mundulus
162-982A-16H-3-W 77	144.98	163.1	162.95	5.31423	5.31423	5.25876	0.86	1.94	0	0.64	0.86		2.58	Hodell et al., 2001	C.mundulus
162-982A-16H-3-W 77	144.98	163.1	162.95	5.31423	5.31423	5.25876	0.91	2.04	0	0.64	0.91	0.91	2.68	Hodell et al., 2001	C.wuellerstorfi
162-982A-16H-3-W 87	145.08	163.2	163.05	5.31649	5.31649	5.25991	0.66	1.95	0	0.64	0.66	0.66	2.59	Hodell et al., 2001	C.wuellerstorfi
162-982A-16H-3-W 97	145.18	163.3	163.15	5.31874	5.31874	5.26107	0.85	1.97	0	0.64	0.85	0.85	2.61	Hodell et al., 2001	C.wuellerstorfi
162-982A-16H-3-W 107	145.28	163.4	163.25	5.321	5.321	5.26222	0.66	1.82	0	0.64	0.66	0.66	2.46	Hodell et al., 2001	C.wuellerstorfi
162-982A-16H-3-W 117	145.38	163.5	163.35	5.32354	5.32347	5.26338	0.65	1.93	0	0.64	0.65	0.65	2.57	Hodell et al., 2001	C.wuellerstorfi
162-982A-16H-3-W 127	145.48	163.6	163.45	5.32608	5.32593	5.26453	0.67	1.91	0	0.64	0.67	0.67	2.55	Hodell et al., 2001	C.wuellerstorfi
162-982A-16H-3-W 127	145.48	163.6	163.45	5.32608	5.32593	5.26453	0.38	2.04	0	0.64	0.38		2.68	Hodell et al., 2001	C.mundulus
162-982A-16H-3-W 137	145.58	163.7	163.55	5.32861	5.3284	5.26569	0.67	1.88	0	0.64	0.67	0.67	2.52	Hodell et al., 2001	C.wuellerstorfi
162-982A-16H-3-W 137	145.58	163.7	163.55	5.32861	5.3284	5.26569	0.54	2.08	0	0.64	0.54		2.72	Hodell et al., 2001	C.mundulus
162-982A-16H-3-W 147	145.68	163.8	163.65	5.33115	5.33086	5.26684	0.51	2.08	0	0.64	0.51		2.72	Hodell et al., 2001	C.mundulus
162-982A-16H-3-W 147	145.68	163.8	163.65	5.33115	5.33086	5.26684	0.74	2.05	0	0.64	0.74	0.74	2.69	Hodell et al., 2001	C.wuellerstorfi
162-982A-16H-4-W 7	145.78	163.9	163.75	5.33369	5.33333	5.268	0.7	2.03	0	0.64	0.7	0.7	2.67	Hodell et al., 2001	C.wuellerstorfi
162-982A-16H-4-W 17	145.88	164	163.85	5.33623	5.33579	5.26915	0.21	2.21	0	0.64	0.21		2.85	Hodell et al., 2001	C.mundulus
162-982A-16H-4-W 17	145.88	164	163.85	5.33623	5.33579	5.26915	0.66	2.25	0	0.64	0.66	0.66	2.89	Hodell et al., 2001	C.wuellerstorfi
162-982A-16H-4-W 27	145.98	164.1	163.95	5.33877	5.33826	5.27031	0.53	2.18	0	0.64	0.53	0.53	2.82	Hodell et al., 2001	C.wuellerstorfi
162-982A-16H-4-W 37	146.08	164.2	164.05	5.34131	5.34072	5.27146	0.27	2.15	0	0.64	0.27		2.79	Hodell et al., 2001	C.mundulus
162-982A-16H-4-W 37	146.08	164.2	164.05	5.34131	5.34072	5.27146	0.76	2.17	0	0.64	0.76	0.76	2.81	Hodell et al., 2001	C.wuellerstorfi
162-982A-16H-4-W 47	146.18	164.3	164.15	5.34384	5.34319	5.27262	0.41	2.15	0	0.64	0.41		2.79	Hodell et al., 2001	C.mundulus
162-982A-16H-4-W 47	146.18	164.3	164.15	5.34384	5.34319	5.27262	0.61	1.99	0	0.64	0.61	0.61	2.63	Hodell et al., 2001	C.wuellerstorfi
162-982A-16H-4-W 57	146.28	164.4	164.25	5.34638	5.34565	5.27377	0.89	1.9	0	0.64	0.89	0.89	2.54	Hodell et al., 2001	C.wuellerstorfi
162-982A-16H-4-W 57	146.28	164.4	164.25	5.34638	5.34565	5.27377	0.58	2.02	0	0.64	0.58		2.66	Hodell et al., 2001	C.mundulus
162-982A-16H-4-W 67	146.38	164.5	164.35	5.34892	5.34812	5.27493	0.73	1.94	0	0.64	0.73		2.58	Hodell et al., 2001	C.mundulus
162-982A-16H-4-W 67	146.38	164.5	164.35	5.34892	5.34812	5.27493	0.87	1.92	0	0.64	0.87	0.87	2.56	Hodell et al., 2001	C.wuellerstorfi
162-982A-16H-4-W 77	146.48	164.6	164.45	5.35146	5.35059	5.27608	0.48	1.81	0	0.64	0.48		2.45	Hodell et al., 2001	C.mundulus
162-982A-16H-4-W 77	146.48	164.6	164.45	5.35146	5.35059	5.27608	0.99	1.89	0	0.64	0.99	0.99	2.53	Hodell et al., 2001	C.wuellerstorfi
162-982A-16H-4-W 87	146.58	164.7	164.55	5.354	5.35305	5.27724	0.62	1.93	0	0.64	0.62		2.57	Hodell et al., 2001	C.mundulus
162-982A-16H-4-W 87	146.58	164.7	164.55	5.354	5.35305	5.27724	0.96	1.86	0	0.64	0.96	0.96	2.5	Hodell et al., 2001	C.wuellerstorfi
162-982A-16H-4-W 97	146.68	164.8	164.65	5.35653	5.35552	5.27839	0.94	1.84	0	0.64	0.94	0.94	2.48	Hodell et al., 2001	C.wuellerstorfi
162-982A-16H-4-W 107	146.78	164.9	164.75	5.35907	5.35798	5.27955	0.93	1.85	0	0.64	0.93	0.93	2.49	Hodell et al., 2001	C.wuellerstorfi
162-982A-16H-4-W 107	146.78	164.9	164.75	5.35907	5.35798	5.27955	0.79	1.81	0	0.64	0.79		2.45	Hodell et al., 2001	C.mundulus
162-982A-16H-4-W 117	146.88	165	164.85	5.36161	5.36045	5.2807	0.93	1.9	0	0.64	0.93		2.54	Hodell et al., 2001	C.mundulus
162-982A-16H-4-W 117	146.88	165	164.85	5.36161	5.36045	5.2807	0.92	1.87	0	0.64	0.92	0.92	2.51	Hodell et al., 2001	C.wuellerstorfi
162-982A-16H-4-W 127	146.98	165.1	164.95	5.36415	5.36291	5.28186	0.65	2.01	0	0.64	0.65		2.65	Hodell et al., 2001	C.mundulus
162-982A-16H-4-W 127	146.98	165.1	164.95	5.36415	5.36291	5.28186	1.03	2.03	0	0.64	1.03	1.03	2.67	Hodell et al., 2001	C.wuellerstorfi
162-982A-16H-4-W 137	147.08	165.2	165.05	5.36669	5.36538	5.28302	0.59	1.94	0	0.64	0.59		2.58	Hodell et al., 2001	C.mundulus
162-982A-16H-4-W 137	147.08	165.2	165.05	5.36669	5.36538	5.28302	1.01	2.02	0	0.64	1.01	1.01	2.66	Hodell et al., 2001	C.wuellerstorfi
162-982A-16H-4-W 147	147.18	165.3	165.15	5.36923	5.36784	5.28417	0.52	2.03	0	0.64	0.52		2.67	Hodell et al., 2001	C.mundulus
162-982A-16H-5-W 7	147.28	165.4	165.25	5.37176	5.37031	5.28533	0.84	2.22	0	0.64	0.84	0.84	2.86	Hodell et al., 2001	C.wuellerstorfi
162-982A-16H-5-W 7	147.28	165.4	165.25	5.37176	5.37031	5.28533	0.6	2.16	0	0.64	0.6		2.8	Hodell et al., 2001	C.mundulus
162-982A-16H-5-W 17	147.38	165.5	165.35	5.3743	5.37278	5.28648	0.68	2.13	0	0.64	0.68		2.77	Hodell et al., 2001	C.mundulus
162-982A-16H-5-W 17	147.38	165.5	165.35	5.3743	5.37278	5.28648	0.95	2.1	0	0.64	0.95	0.95	2.74	Hodell et al., 2001	C.wuellerstorfi
162-982A-16H-5-W 27	147.48	165.6	165.45	5.37684	5.37524	5.28764	0.79	2.12	0	0.64	0.79	0.79	2.76	Hodell et al., 2001	C.wuellerstorfi
162-982A-16H-5-W 27	147.48	165.6	165.45	5.37684	5.37524	5.28764	0.19	2.17	0	0.64	0.19		2.81	Hodell et al., 2001	C.mundulus
162-982A-16H-5-W 37	147.58	165.7	165.55	5.37938	5.37771	5.28879	0.77	2.03	0	0.64	0.77	0.77	2.67	Hodell et al., 2001	C.wuellerstorfi
162-982A-16H-5-W 37	147.58	165.7	165.55	5.37938	5.37771	5.28879	0.29	2.13	0	0.64	0.29		2.77	Hodell et al., 2001	C.mundulus
162-982A-16H-5-W 47	147.68	165.8	165.65	5.38192	5.38017	5.28995	0.9	2.08	0	0.64	0.9	0.9	2.72	Hodell et al., 2001	C.wuellerstorfi
162-982A-16H-5-W 47	147.68	165.8	165.65	5.38192	5.38017	5.28995	0.35	2.09	0	0.64	0.35		2.73	Hodell et al., 2001	C.mundulus
162-982A-16H-5-W 57	147.78	165.9	165.75	5.38445	5.38264	5.2911	0.16	1.92	0	0.64	0.16		2.56	Hodell et al., 2001	C.mundulus
162-982A-16H-5-W 57	147.78	165.9	165.75	5.38445	5.38264	5.2911	0.92	2.05	0	0.64	0.92	0.92	2.69	Hodell et al., 2001	C.wuellerstorfi
162-982A-16H-5-W 67	147.88	166	165.85	5.38699	5.3851	5.29226	0.53	2.01	0	0.64	0.53		2.65	Hodell et al., 2001	C.mundulus
162-982A-16H-5-W 67	147.88	166	165.85	5.38699	5.3851	5.29226	0.74	2.02	0	0.64	0.74	0.74	2.66	Hodell et al., 2001	C.wuellerstorfi
162-982A-16H-5-W 77	147.98	166.1	165.95	5.38953	5.38757	5.29341	0.8	1.99	0	0.64	0.8		2.63	Hodell et al., 2001	C.mundulus
162-982A-16H-5-W 77	147.98	166.1	165.95	5.38953	5.38757	5.29341	0.69	1.93	0	0.64	0.69	0.69	2.57	Hodell et al., 2001	C.wuellerstorfi
162-982A-16H-5-W 87	148.08	166.2	166.05	5.39207	5.39003	5.29457	0.87	1.85	0	0.64	0.87	0.87	2.49	Hodell et al., 2001	C.wuellerstorfi
162-982A-16H-5-W 87	148.08	166.2	166.05	5.39207	5.39003	5.29457	0.69	2.02	0	0.64	0.69		2.66	Hodell et al., 2001	C.mundulus
162-982A-16H-5-W 97	148.18	166.3	166.15	5.39461	5.3925	5.29572	0.44	2.06	0	0.64	0.44		2.7	Hodell et al., 2001	C.mundulus
162-982A-16H-5-W 97	148.18	166.3	166.15	5.39461	5.3925	5.29572	0.79	1.99	0	0.64	0.79	0.79	2.63	Hodell et al., 2001	C.wuellerstorfi
162-982A-16H-5-W 107	148.28	166.4	166.25	5.39715	5.39496	5.29688	0.54	2.21	0	0.64	0.54		2.85	Hodell et al., 2001	C.mundulus
162-982A-16H-5-W 107	148.28	166.4	166.25	5.39715	5.39496	5.29688	0.78	1.9	0	0.64	0.78	0.78	2.54	Hodell et al., 2001	C.wuellerstorfi
162-982A-16H-5-W 117	148.38	166.5	166.35	5.39968	5.39743	5.29803	0.92	2.02	0	0.64	0.92	0.92	2.66	Hodell et al., 2001	C.wuellerstorfi
162-982A-16H-5-W 117	148.38	166.5	166.35	5.39968	5.39743	5.29803	0.35	1.94	0	0.64	0.35		2.58	Hodell et al., 2001	C.mundulus
162-982A-16H-5-W 127	148.48	166.6	166.45	5.40222	5.3999	5.29919	0.59	1.93	0	0.64	0.59		2.57	Hodell et al., 2001	C.mundulus
162-982A-16H-5-W 127	148.48	166.6	166.45	5.40222	5.3999	5.29919	0.81	1.91	0	0.64	0.81	0.81	2.55	Hodell et al., 2001	C.wuellerstorfi
162-982A-16H-5-W 137	148.58	166.7	166.55	5.40476	5.40236	5.30034	0.73	1.85	0	0.64	0.73	0.73	2.49	Hodell et al., 2001	C.wuellerstorfi
162-982A-16H-5-W 137	148.58	166.7	166.55	5.40476	5.40236	5.30034	0.29	1.94	0	0.64	0.29		2.58	Hodell et al., 2001	C.mundulus
162-982A-16H-5-W 147	148.68	166.8	166.65	5.4073	5.40483	5.3015	0.7	1.78	0	0.64	0.7	0.7	2.42	Hodell et al., 2001	C.wuellerstorfi
162-982A-16H-5-W 147	148.68	166.8	166.65	5.4073	5.40483	5.3015	0.32	1.89	0	0.64	0.32		2.53	Hodell et al., 2001	C.mundulus
162-982A-16H-6-W 7	148.78	166.9	166.75	5.40984	5.40729	5.30265	0.6	1.95	0	0.64	0.6	0.6	2.59	Hodell et al., 2001	C.wuellerstorfi
162-982A-16H-6-W 7	148.78	166.9	166.75	5.40984	5.40729	5.30265	0.58	1.86	0	0.64	0.58		2.5	Hodell et al., 2001	C.mundulus
162-982A-16H-6-W 17	148.88	167	166.85	5.41237	5.40976	5.30552	0.74	1.85	0	0.64	0.74		2.49	Hodell et al., 2001	C.mundulus
162-982A-16H-6-W 17	148.88	167	166.85	5.41237	5.40976	5.30552	0.76	1.81	0	0.64	0.76	0.76	2.45	Hodell et al., 2001	C.wuellerstorfi
162-982A-16H-6-W 27	148.98	167.1	166.95	5.41491	5.41222	5.30912	0.8	1.88	0	0.64	0.8	0.8	2.52	Hodell et al., 2001	C.wuellerstorfi
162-982A-16H-6-W 27	148.98	167.1	166.95	5.41491	5.41222	5.30912	0.71	1.79	0	0.64	0.71		2.43	Hodell et al., 2001	C.mundulus
162-982A-16H-6-W 37	149.08	167.2	167.05	5.41745	5.41469	5.31272	0.7	2	0	0.64	0.7	0.7	2.64	Hodell et al., 2001	C.wuellerstorfi
162-982A-16H-6-W 37	149.08	167.2	167.05	5.41745	5.41469	5.31272	0.31	1.98	0	0.64	0.31		2.62	Hodell et al., 2001	C.mundulus
162-982A-16H-6-W 47	149.18	167.3	167.15	5.41999	5.41715	5.31632	0.17	2.13	0	0.64	0.17		2.77	Hodell et al., 2001	C.mundulus
162-982A-16H-6-W 47	149.18	167.3	167.15	5.41999	5.41715	5.31632	0.68	2.19	0	0.64	0.68	0.68	2.83	Hodell et al., 2001	C.wuellerstorfi
162-982A-16H-6-W 57	149.28	167.4	167.25	5.42253	5.41962	5.31992	0.57	2.03	0	0.64	0.57	0.57	2.67	Hodell et al., 2001	C.wuellerstorfi
162-982A-16H-6-W 57	149.28	167.4	167.25	5.42253	5.41962	5.31992	0.1	2.08	0	0.64	0.1		2.72	Hodell et al., 2001	C.mundulus
162-982A-16H-6-W 67	149.38	167.5	167.35	5.42507	5.42208	5.32353	0.88	2.01	0	0.64	0.88	0.88	2.65	Hodell et al., 2001	C.wuellerstorfi
162-982A-16H-6-W 67	149.38	167.5	167.35	5.42507	5.42208	5.32353	0.06	2.06	0	0.64	0.06		2.7	Hodell et al., 2001	C.mundulus
162-982A-16H-6-W 77	149.48	167.6	167.45	5.4276	5.42455	5.32713	0.38	1.97	0	0.64	0.38		2.61	Hodell et al., 2001	C.mundulus
162-982A-16H-6-W 77	149.48	167.6	167.45	5.4276	5.42455	5.32713	0.57	1.94	0	0.64	0.57	0.57	2.58	Hodell et al., 2001	C.wuellerstorfi
162-982B-17H-3-W 117	152.18	167.77	167.62	5.43192	5.42874	5.33325	0.2	1.85	0	0.64	0.2		2.49	Hodell et al., 2001	C.mundulus
162-982B-17H-3-W 127	152.28	167.87	167.72	5.43446	5.43121	5.33685	0.21	2.13	0	0.64	0.21		2.77	Hodell et al., 2001	C.mundulus
162-982B-17H-3-W 127	152.28	167.87	167.72	5.43446	5.43121	5.33685	0.45	2.09	0	0.64	0.45	0.45	2.73	Hodell et al., 2001	C.wuellerstorfi
162-982B-17H-3-W 137	152.38	167.97	167.82	5.43699	5.43367	5.34558	-0.15	2.06	0	0.64	-0.15		2.7	Hodell et al., 2001	C.mundulus
162-982B-17H-3-W 137	152.38	167.97	167.82	5.43699	5.43367	5.34558	0.48	2.17	0	0.64	0.48	0.48	2.81	Hodell et al., 2001	C.wuellerstorfi
162-982B-17H-4-W 7	152.58	168.17	168.02	5.44207	5.4386	5.35203	0.46	2.07	0	0.64	0.46	0.46	2.71	Hodell et al., 2001	C.wuellerstorfi
162-982B-17H-4-W 7	152.58	168.17	168.02	5.44207	5.4386	5.35203	-0.06	2.08	0	0.64	-0.06		2.72	Hodell et al., 2001	C.mundulus
162-982B-17H-4-W 17	152.68	168.27	168.12	5.44461	5.44107	5.35525	0.32	1.97	0	0.64	0.32		2.61	Hodell et al., 2001	C.mundulus
162-982B-17H-4-W 17	152.68	168.27	168.12	5.44461	5.44107	5.35525	0.52	2.1	0	0.64	0.52	0.52	2.74	Hodell et al., 2001	C.wuellerstorfi
162-982B-17H-4-W 27	152.78	168.37	168.22	5.44715	5.44353	5.35847	0.45	1.9	0	0.64	0.45		2.54	Hodell et al., 2001	C.mundulus
162-982B-17H-4-W 37	152.88	168.47	168.32	5.44969	5.446	5.3617	0.43	1.82	0	0.64	0.43		2.46	Hodell et al., 2001	C.mundulus
162-982B-17H-4-W 37	152.88	168.47	168.32	5.44969	5.446	5.3617	0.74	1.77	0	0.64	0.74	0.74	2.41	Hodell et al., 2001	C.wuellerstorfi
162-982B-17H-4-W 47	152.98	168.57	168.42	5.45222	5.44814	5.36492	0.29	1.73	0	0.64	0.29		2.37	Hodell et al., 2001	C.mundulus
162-982B-17H-4-W 57	153.08	168.67	168.52	5.45476	5.45028	5.37034	0.42	2.08	0	0.64	0.42		2.72	Hodell et al., 2001	C.mundulus
162-982B-17H-4-W 67	153.18	168.77	168.62	5.4573	5.45242	5.37372	0.49	2.16	0	0.64	0.49		2.8	Hodell et al., 2001	C.mundulus
162-982B-17H-4-W 67	153.18	168.77	168.62	5.4573	5.45242	5.37372	0.67	2.16	0	0.64	0.67	0.67	2.8	Hodell et al., 2001	C.wuellerstorfi
162-982B-17H-4-W 77	153.28	168.87	168.72	5.45984	5.45456	5.37711	0.77	2.2	0	0.64	0.77	0.77	2.84	Hodell et al., 2001	C.wuellerstorfi
162-982B-17H-4-W 77	153.28	168.87	168.72	5.45984	5.45456	5.37711	0.32	2.17	0	0.64	0.32		2.81	Hodell et al., 2001	C.mundulus
162-982B-17H-4-W 87	153.38	168.97	168.82	5.46238	5.4567	5.3805	0.62	2.15	0	0.64	0.62	0.62	2.79	Hodell et al., 2001	C.wuellerstorfi
162-982B-17H-4-W 87	153.38	168.97	168.82	5.46238	5.4567	5.3805	0.09	2.19	0	0.64	0.09		2.83	Hodell et al., 2001	C.mundulus
162-982B-17H-4-W 97	153.48	169.07	168.92	5.46491	5.45884	5.38388	0.44	2.05	0	0.64	0.44		2.69	Hodell et al., 2001	C.mundulus
162-982B-17H-4-W 97	153.48	169.07	168.92	5.46491	5.45884	5.38388	0.7	1.99	0	0.64	0.7	0.7	2.63	Hodell et al., 2001	C.wuellerstorfi
162-982B-17H-4-W 107	153.58	169.17	169.02	5.46745	5.46099	5.38727	0.58	2.12	0	0.64	0.58		2.76	Hodell et al., 2001	C.mundulus
162-982B-17H-4-W 107	153.58	169.17	169.02	5.46745	5.46099	5.38727	0.82	2.13	0	0.64	0.82	0.82	2.77	Hodell et al., 2001	C.wuellerstorfi
162-982B-17H-4-W 117	153.68	169.27	169.12	5.46999	5.46313	5.39066	0.62	1.92	0	0.64	0.62		2.56	Hodell et al., 2001	C.mundulus
162-982B-17H-4-W 117	153.68	169.27	169.12	5.46999	5.46313	5.39066	0.64	2.1	0	0.64	0.64	0.64	2.74	Hodell et al., 2001	C.wuellerstorfi
162-982B-17H-4-W 127	153.78	169.37	169.22	5.47253	5.46527	5.39404	1.02	2.11	0	0.64	1.02		2.75	Hodell et al., 2001	C.mundulus
162-982B-17H-4-W 127	153.78	169.37	169.22	5.47253	5.46527	5.39404	0.43	1.99	0	0.64	0.43	0.43	2.63	Hodell et al., 2001	C.wuellerstorfi
162-982B-17H-4-W 137	153.88	169.47	169.32	5.47507	5.46741	5.39743	0.98	1.92	0	0.64	0.98		2.56	Hodell et al., 2001	C.mundulus
162-982B-17H-5-W 7	154.08	169.67	169.52	5.48014	5.47169	5.4042	0.45	2.08	0	0.64	0.45		2.72	Hodell et al., 2001	C.mundulus
162-982B-17H-5-W 7	154.08	169.67	169.52	5.48014	5.47169	5.4042	1.02	1.99	0	0.64	1.02	1.02	2.63	Hodell et al., 2001	C.wuellerstorfi
162-982B-17H-5-W 27	154.28	169.87	169.72	5.48522	5.47597	5.41097	0.74	2.06	0	0.64	0.74		2.7	Hodell et al., 2001	C.mundulus
162-982B-17H-5-W 27	154.28	169.87	169.72	5.48522	5.47597	5.41097	1.04	2.11	0	0.64	1.04	1.04	2.75	Hodell et al., 2001	C.wuellerstorfi
162-982B-17H-5-W 37	154.38	169.97	169.82	5.48776	5.47811	5.41436	0.98	2.08	0	0.64	0.98	0.98	2.72	Hodell et al., 2001	C.wuellerstorfi
162-982B-17H-5-W 37	154.38	169.97	169.82	5.48776	5.47811	5.41436	0.88	2.14	0	0.64	0.88		2.78	Hodell et al., 2001	C.mundulus
162-982B-17H-5-W 47	154.48	170.07	169.92	5.4903	5.48025	5.41775	0.74	2.05	0	0.64	0.74		2.69	Hodell et al., 2001	C.mundulus
162-982B-17H-5-W 47	154.48	170.07	169.92	5.4903	5.48025	5.41775	1.02	2.13	0	0.64	1.02	1.02	2.77	Hodell et al., 2001	C.wuellerstorfi
162-982B-17H-5-W 57	154.58	170.17	170.02	5.49283	5.48239	5.42113	0.74	2.03	0	0.64	0.74	0.74	2.67	Hodell et al., 2001	C.wuellerstorfi
162-982B-17H-5-W 57	154.58	170.17	170.02	5.49283	5.48239	5.42113	0.69	1.96	0	0.64	0.69		2.6	Hodell et al., 2001	C.mundulus
162-982B-17H-5-W 67	154.68	170.27	170.12	5.49537	5.48453	5.42452	0.69	2.11	0	0.64	0.69	0.69	2.75	Hodell et al., 2001	C.wuellerstorfi
162-982B-17H-5-W 67	154.68	170.27	170.12	5.49537	5.48453	5.42452	0.6	2.07	0	0.64	0.6		2.71	Hodell et al., 2001	C.mundulus
162-982B-17H-5-W 77	154.78	170.37	170.22	5.49791	5.48667	5.4279	0.76	1.92	0	0.64	0.76	0.76	2.56	Hodell et al., 2001	C.wuellerstorfi
162-982B-17H-5-W 77	154.78	170.37	170.22	5.49791	5.48667	5.4279	0.56	2	0	0.64	0.56		2.64	Hodell et al., 2001	C.mundulus
162-982B-17H-5-W 87	154.88	170.47	170.32	5.50045	5.48882	5.43129	0.8	1.93	0	0.64	0.8	0.8	2.57	Hodell et al., 2001	C.wuellerstorfi
162-982B-17H-5-W 87	154.88	170.47	170.32	5.50045	5.48882	5.43129	0.5	1.96	0	0.64	0.5		2.6	Hodell et al., 2001	C.mundulus
162-982B-17H-5-W 97	154.98	170.57	170.42	5.50299	5.49096	5.43468	0.64	1.92	0	0.64	0.64		2.56	Hodell et al., 2001	C.mundulus
162-982B-17H-5-W 97	154.98	170.57	170.42	5.50299	5.49096	5.43468	0.75	1.9	0	0.64	0.75	0.75	2.54	Hodell et al., 2001	C.wuellerstorfi
162-982B-17H-5-W 107	155.08	170.67	170.52	5.50553	5.4931	5.43806	0.64	1.86	0	0.64	0.64	0.64	2.5	Hodell et al., 2001	C.wuellerstorfi
162-982B-17H-5-W 107	155.08	170.67	170.52	5.50553	5.4931	5.43806	0.59	2	0	0.64	0.59		2.64	Hodell et al., 2001	C.mundulus
162-982B-17H-5-W 117	155.18	170.77	170.62	5.50806	5.49524	5.44145	0.92	2.01	0	0.64	0.92	0.92	2.65	Hodell et al., 2001	C.wuellerstorfi
162-982B-17H-5-W 117	155.18	170.77	170.62	5.50806	5.49524	5.44145	0.56	2.16	0	0.64	0.56		2.8	Hodell et al., 2001	C.mundulus
162-982B-17H-5-W 127	155.28	170.87	170.72	5.5106	5.49738	5.44484	0.73	1.84	0	0.64	0.73	0.73	2.48	Hodell et al., 2001	C.wuellerstorfi
162-982B-17H-5-W 127	155.28	170.87	170.72	5.5106	5.49738	5.44484	0.7	2.2	0	0.64	0.7		2.84	Hodell et al., 2001	C.mundulus
162-982B-17H-5-W 137	155.38	170.97	170.82	5.51314	5.49952	5.44822	0.74	1.94	0	0.64	0.74	0.74	2.58	Hodell et al., 2001	C.wuellerstorfi
162-982B-17H-5-W 137	155.38	170.97	170.82	5.51314	5.49952	5.44822	0.56	2	0	0.64	0.56		2.64	Hodell et al., 2001	C.mundulus
162-982B-17H-5-W 147	155.48	171.07	170.92	5.51568	5.50166	5.45161	0.76	2.24	0	0.64	0.76	0.76	2.88	Hodell et al., 2001	C.wuellerstorfi
162-982B-17H-5-W 147	155.48	171.07	170.92	5.51568	5.50166	5.45161	0.57	2.17	0	0.64	0.57		2.81	Hodell et al., 2001	C.mundulus
162-982B-17H-6-W 7	155.58	171.17	171.02	5.51822	5.5038	5.45499	0.84	2.3	0	0.64	0.84	0.84	2.94	Hodell et al., 2001	C.wuellerstorfi
162-982B-17H-6-W 7	155.58	171.17	171.02	5.51822	5.5038	5.45499	0.32	2.15	0	0.64	0.32		2.79	Hodell et al., 2001	C.mundulus
162-982B-17H-6-W 17	155.68	171.27	171.12	5.52075	5.50594	5.45838	0.26	2.24	0	0.64	0.26		2.88	Hodell et al., 2001	C.mundulus
162-982B-17H-6-W 17	155.68	171.27	171.12	5.52075	5.50594	5.45838	0.6	2.11	0	0.64	0.6	0.6	2.75	Hodell et al., 2001	C.wuellerstorfi
162-982A-17H-2-W 7	152.28	171.28	171.13	5.52101	5.50616	5.45872	0.73	2.08	0	0.64	0.73	0.73	2.72	Hodell et al., 2001	C.wuellerstorfi
162-982A-17H-2-W 17	152.38	171.38	171.23	5.52355	5.5083	5.46211	0.9	1.97	0	0.64	0.9		2.61	Hodell et al., 2001	C.mundulus
162-982A-17H-2-W 27	152.48	171.48	171.33	5.52608	5.51044	5.46549	0.86	2.03	0	0.64	0.86	0.86	2.67	Hodell et al., 2001	C.wuellerstorfi
162-982A-17H-2-W 27	152.48	171.48	171.33	5.52608	5.51044	5.46549	0.3	2.18	0	0.64	0.3		2.82	Hodell et al., 2001	C.mundulus
162-982A-17H-2-W 37	152.58	171.58	171.43	5.52862	5.51258	5.46888	0.82	2.19	0	0.64	0.82	0.82	2.83	Hodell et al., 2001	C.wuellerstorfi
162-982A-17H-2-W 37	152.58	171.58	171.43	5.52862	5.51258	5.46888	0.55	2.03	0	0.64	0.55		2.67	Hodell et al., 2001	C.mundulus
162-982A-17H-2-W 47	152.68	171.68	171.53	5.53116	5.51472	5.47226	0.72	1.83	0	0.64	0.72	0.72	2.47	Hodell et al., 2001	C.wuellerstorfi
162-982A-17H-2-W 47	152.68	171.68	171.53	5.53116	5.51472	5.47226	0.73	1.99	0	0.64	0.73		2.63	Hodell et al., 2001	C.mundulus
162-982A-17H-2-W 57	152.78	171.78	171.63	5.5337	5.51686	5.47565	0.64	1.8	0	0.64	0.64		2.44	Hodell et al., 2001	C.mundulus
162-982A-17H-2-W 57	152.78	171.78	171.63	5.5337	5.51686	5.47565	0.85	1.88	0	0.64	0.85	0.85	2.52	Hodell et al., 2001	C.wuellerstorfi
162-982A-17H-2-W 67	152.88	171.88	171.73	5.53624	5.519	5.47904	0.44	1.96	0	0.64	0.44		2.6	Hodell et al., 2001	C.mundulus
162-982A-17H-2-W 67	152.88	171.88	171.73	5.53624	5.519	5.47904	0.78	1.79	0	0.64	0.78	0.78	2.43	Hodell et al., 2001	C.wuellerstorfi
162-982A-17H-2-W 77	152.98	171.98	171.83	5.53877	5.5224	5.48242	0.85	1.94	0	0.64	0.85	0.85	2.58	Hodell et al., 2001	C.wuellerstorfi
162-982A-17H-2-W 77	152.98	171.98	171.83	5.53877	5.5224	5.48242	0.51	1.87	0	0.64	0.51		2.51	Hodell et al., 2001	C.mundulus
162-982A-17H-2-W 87	153.08	172.08	171.93	5.54131	5.5258	5.48581	0.49	2.12	0	0.64	0.49		2.76	Hodell et al., 2001	C.mundulus
162-982A-17H-2-W 97	153.18	172.18	172.03	5.54385	5.5292	5.4892	0.51	2.16	0	0.64	0.51		2.8	Hodell et al., 2001	C.mundulus
162-982A-17H-2-W 107	153.28	172.28	172.13	5.54639	5.5326	5.49258	0.72	2.12	0	0.64	0.72		2.76	Hodell et al., 2001	C.mundulus
162-982A-17H-2-W 107	153.28	172.28	172.13	5.54639	5.5326	5.49258	0.53	1.83	0	0.64	0.53	0.53	2.47	Hodell et al., 2001	C.wuellerstorfi
162-982A-17H-2-W 117	153.38	172.38	172.23	5.54893	5.536	5.49597	0.41	2.08	0	0.64	0.41		2.72	Hodell et al., 2001	C.mundulus
162-982A-17H-2-W 117	153.38	172.38	172.23	5.54893	5.536	5.49597	0.87	2.14	0	0.64	0.87	0.87	2.78	Hodell et al., 2001	C.wuellerstorfi
162-982A-17H-2-W 127	153.48	172.48	172.33	5.55147	5.5394	5.49428	1.03	2.08	0	0.64	1.03	1.03	2.72	Hodell et al., 2001	C.wuellerstorfi
162-982A-17H-2-W 127	153.48	172.48	172.33	5.55147	5.5394	5.49428	0.48	2.15	0	0.64	0.48		2.79	Hodell et al., 2001	C.mundulus
162-982A-17H-2-W 137	153.58	172.58	172.43	5.554	5.5428	5.4973	0.3	2.25	0	0.64	0.3		2.89	Hodell et al., 2001	C.mundulus
162-982A-17H-2-W 137	153.58	172.58	172.43	5.554	5.5428	5.4973	0.56	2.33	0	0.64	0.56	0.56	2.97	Hodell et al., 2001	C.wuellerstorfi
162-982A-17H-2-W 147	153.68	172.68	172.53	5.55654	5.5462	5.50033	0.51	2.51	0	0.64	0.51		3.15	Hodell et al., 2001	C.mundulus
162-982A-17H-2-W 147	153.68	172.68	172.53	5.55654	5.5462	5.50033	0.74	2.41	0	0.64	0.74	0.74	3.05	Hodell et al., 2001	C.wuellerstorfi
162-982A-17H-3-W 7	153.78	172.78	172.63	5.55908	5.5496	5.50336	0.25	2.65	0	0.64	0.25		3.29	Hodell et al., 2001	C.mundulus
162-982A-17H-3-W 7	153.78	172.78	172.63	5.55908	5.5496	5.50336	0.67	2.69	0	0.64	0.67	0.67	3.33	Hodell et al., 2001	C.wuellerstorfi
162-982A-17H-3-W 17	153.88	172.88	172.73	5.56162	5.553	5.50638	0.64	2.56	0	0.64	0.64	0.64	3.2	Hodell et al., 2001	C.wuellerstorfi
162-982A-17H-3-W 17	153.88	172.88	172.73	5.56162	5.553	5.50638	0.17	2.51	0	0.64	0.17		3.15	Hodell et al., 2001	C.mundulus
162-982A-17H-3-W 27	153.98	172.98	172.83	5.56416	5.5564	5.50941	0.53	2.18	0	0.64	0.53		2.82	Hodell et al., 2001	C.mundulus
162-982A-17H-3-W 27	153.98	172.98	172.83	5.56416	5.5564	5.50941	0.86	2.28	0	0.64	0.86	0.86	2.92	Hodell et al., 2001	C.wuellerstorfi
162-982A-17H-3-W 37	154.08	173.08	172.93	5.56669	5.5598	5.51243	0.94	2.16	0	0.64	0.94	0.94	2.8	Hodell et al., 2001	C.wuellerstorfi
162-982A-17H-3-W 37	154.08	173.08	172.93	5.56669	5.5598	5.51243	0.59	2.11	0	0.64	0.59		2.75	Hodell et al., 2001	C.mundulus
162-982A-17H-3-W 47	154.18	173.18	173.03	5.56923	5.5632	5.51546	0.68	1.97	0	0.64	0.68		2.61	Hodell et al., 2001	C.mundulus
162-982A-17H-3-W 47	154.18	173.18	173.03	5.56923	5.5632	5.51546	0.94	2.11	0	0.64	0.94	0.94	2.75	Hodell et al., 2001	C.wuellerstorfi
162-982A-17H-3-W 57	154.28	173.28	173.13	5.57177	5.5666	5.51849	0.74	2.12	0	0.64	0.74		2.76	Hodell et al., 2001	C.mundulus
162-982A-17H-3-W 57	154.28	173.28	173.13	5.57177	5.5666	5.51849	0.94	2.19	0	0.64	0.94	0.94	2.83	Hodell et al., 2001	C.wuellerstorfi
162-982A-17H-3-W 67	154.38	173.38	173.23	5.57431	5.57	5.52203	0.94	2.27	0	0.64	0.94	0.94	2.91	Hodell et al., 2001	C.wuellerstorfi
162-982A-17H-3-W 67	154.38	173.38	173.23	5.57431	5.57	5.52203	0.62	2.25	0	0.64	0.62		2.89	Hodell et al., 2001	C.mundulus
162-982A-17H-3-W 77	154.48	173.48	173.33	5.57685	5.5734	5.52609	0.7	2.34	0	0.64	0.7		2.98	Hodell et al., 2001	C.mundulus
162-982A-17H-3-W 77	154.48	173.48	173.33	5.57685	5.5734	5.52609	0.84	2.26	0	0.64	0.84	0.84	2.9	Hodell et al., 2001	C.wuellerstorfi
162-982A-17H-3-W 87	154.58	173.58	173.43	5.57939	5.5768	5.53016	0.8	2.28	0	0.64	0.8	0.8	2.92	Hodell et al., 2001	C.wuellerstorfi
162-982A-17H-3-W 87	154.58	173.58	173.43	5.57939	5.5768	5.53016	0.78	2.31	0	0.64	0.78		2.95	Hodell et al., 2001	C.mundulus
162-982A-17H-3-W 97	154.68	173.68	173.53	5.58192	5.5802	5.53422	0.7	2.26	0	0.64	0.7	0.7	2.9	Hodell et al., 2001	C.wuellerstorfi
162-982A-17H-3-W 97	154.68	173.68	173.53	5.58192	5.5802	5.53422	0.49	2.22	0	0.64	0.49		2.86	Hodell et al., 2001	C.mundulus
162-982A-17H-3-W 107	154.78	173.78	173.63	5.58446	5.5836	5.53828	0.61	2.24	0	0.64	0.61	0.61	2.88	Hodell et al., 2001	C.wuellerstorfi
162-982A-17H-3-W 107	154.78	173.78	173.63	5.58446	5.5836	5.53828	0.64	2.28	0	0.64	0.64		2.92	Hodell et al., 2001	C.mundulus
162-982A-17H-3-W 117	154.88	173.88	173.73	5.587	5.587	5.54234	0.84	2.43	0	0.64	0.84	0.84	3.07	Hodell et al., 2001	C.wuellerstorfi
162-982A-17H-3-W 117	154.88	173.88	173.73	5.587	5.587	5.54234	0.49	2.48	0	0.64	0.49		3.12	Hodell et al., 2001	C.mundulus
162-982A-17H-3-W 127	154.98	173.98	173.83	5.5888	5.58883	5.53299	0.39	2.34	0	0.64	0.39		2.98	Hodell et al., 2001	C.mundulus
162-982A-17H-3-W 127	154.98	173.98	173.83	5.5888	5.58883	5.53299	0.68	2.25	0	0.64	0.68	0.68	2.89	Hodell et al., 2001	C.wuellerstorfi
162-982A-17H-3-W 137	155.08	174.08	173.93	5.59061	5.59067	5.53555	0.48	2.38	0	0.64	0.48		3.02	Hodell et al., 2001	C.mundulus
162-982A-17H-3-W 137	155.08	174.08	173.93	5.59061	5.59067	5.53555	0.9	2.39	0	0.64	0.9	0.9	3.03	Hodell et al., 2001	C.wuellerstorfi
162-982A-17H-3-W 147	155.18	174.18	174.03	5.59241	5.5925	5.53811	0.91	2.28	0	0.64	0.91	0.91	2.92	Hodell et al., 2001	C.wuellerstorfi
162-982A-17H-3-W 147	155.18	174.18	174.03	5.59241	5.5925	5.53811	0.55	2.27	0	0.64	0.55		2.91	Hodell et al., 2001	C.mundulus
162-982A-17H-4-W 7	155.28	174.28	174.13	5.59422	5.59433	5.54066	0.89	2.15	0	0.64	0.89	0.89	2.79	Hodell et al., 2001	C.wuellerstorfi
162-982A-17H-4-W 17	155.38	174.38	174.23	5.59602	5.59617	5.54322	1.03	2.2	0	0.64	1.03	1.03	2.84	Hodell et al., 2001	C.wuellerstorfi
162-982A-17H-4-W 17	155.38	174.38	174.23	5.59602	5.59617	5.54322	0.53	2.25	0	0.64	0.53		2.89	Hodell et al., 2001	C.mundulus
162-982A-17H-4-W 27	155.48	174.48	174.33	5.59783	5.598	5.54578	1	2.17	0	0.64	1	1	2.81	Hodell et al., 2001	C.wuellerstorfi
162-982A-17H-4-W 27	155.48	174.48	174.33	5.59783	5.598	5.54578	0.82	2.25	0	0.64	0.82		2.89	Hodell et al., 2001	C.mundulus
162-982A-17H-4-W 37	155.58	174.58	174.43	5.59963	5.59983	5.54834	0.93	2.09	0	0.64	0.93	0.93	2.73	Hodell et al., 2001	C.wuellerstorfi
162-982A-17H-4-W 37	155.58	174.58	174.43	5.59963	5.59983	5.54834	0.71	2.08	0	0.64	0.71		2.72	Hodell et al., 2001	C.mundulus
162-982A-17H-4-W 47	155.68	174.68	174.53	5.60144	5.60167	5.5509	0.75	2.02	0	0.64	0.75		2.66	Hodell et al., 2001	C.mundulus
162-982A-17H-4-W 47	155.68	174.68	174.53	5.60144	5.60167	5.5509	0.93	2.09	0	0.64	0.93	0.93	2.73	Hodell et al., 2001	C.wuellerstorfi
162-982A-17H-4-W 57	155.78	174.78	174.63	5.60324	5.6035	5.55346	1.01	2.1	0	0.64	1.01	1.01	2.74	Hodell et al., 2001	C.wuellerstorfi
162-982A-17H-4-W 57	155.78	174.78	174.63	5.60324	5.6035	5.55346	0.63	2.02	0	0.64	0.63		2.66	Hodell et al., 2001	C.mundulus
162-982A-17H-4-W 67	155.88	174.88	174.73	5.60504	5.60533	5.55602	0.6	2.09	0	0.64	0.6		2.73	Hodell et al., 2001	C.mundulus
162-982A-17H-4-W 67	155.88	174.88	174.73	5.60504	5.60533	5.55602	0.99	2.06	0	0.64	0.99	0.99	2.7	Hodell et al., 2001	C.wuellerstorfi
162-982A-17H-4-W 77	155.98	174.98	174.83	5.60685	5.60717	5.55858	0.87	2.08	0	0.64	0.87	0.87	2.72	Hodell et al., 2001	C.wuellerstorfi
162-982A-17H-4-W 87	156.08	175.08	174.93	5.60865	5.609	5.56114	0.74	2.03	0	0.64	0.74	0.74	2.67	Hodell et al., 2001	C.wuellerstorfi
162-982A-17H-4-W 97	156.18	175.18	175.03	5.61046	5.61083	5.5637	0.8	2.04	0	0.64	0.8	0.8	2.68	Hodell et al., 2001	C.wuellerstorfi
162-982A-17H-4-W 107	156.28	175.28	175.13	5.61226	5.61267	5.56639	0.73	1.87	0	0.64	0.73	0.73	2.51	Hodell et al., 2001	C.wuellerstorfi
162-982A-17H-4-W 117	156.38	175.38	175.23	5.61407	5.6145	5.57025	0.79	2	0	0.64	0.79	0.79	2.64	Hodell et al., 2001	C.wuellerstorfi
162-982A-17H-4-W 117	156.38	175.38	175.23	5.61407	5.6145	5.57025	0.55	1.79	0	0.64	0.55		2.43	Hodell et al., 2001	C.mundulus
162-982A-17H-4-W 127	156.48	175.48	175.33	5.61587	5.61633	5.57411	0.55	1.99	0	0.64	0.55		2.63	Hodell et al., 2001	C.mundulus
162-982A-17H-4-W 127	156.48	175.48	175.33	5.61587	5.61633	5.57411	0.75	2.11	0	0.64	0.75	0.75	2.75	Hodell et al., 2001	C.wuellerstorfi
162-982A-17H-4-W 137	156.58	175.58	175.43	5.61768	5.61817	5.57796	0.71	2.12	0	0.64	0.71	0.71	2.76	Hodell et al., 2001	C.wuellerstorfi
162-982A-17H-4-W 137	156.58	175.58	175.43	5.61768	5.61817	5.57796	0.74	2.15	0	0.64	0.74		2.79	Hodell et al., 2001	C.mundulus
162-982A-17H-4-W 147	156.68	175.68	175.53	5.61948	5.62	5.58182	0.75	2.24	0	0.64	0.75	0.75	2.88	Hodell et al., 2001	C.wuellerstorfi
162-982A-17H-4-W 147	156.68	175.68	175.53	5.61948	5.62	5.58182	0.54	2.29	0	0.64	0.54		2.93	Hodell et al., 2001	C.mundulus
162-982A-17H-5-W 7	156.78	175.78	175.63	5.62129	5.62183	5.58568	0.56	2.12	0	0.64	0.56	0.56	2.76	Hodell et al., 2001	C.wuellerstorfi
162-982A-17H-5-W 7	156.78	175.78	175.63	5.62129	5.62183	5.58568	0.39	2.02	0	0.64	0.39		2.66	Hodell et al., 2001	C.mundulus
162-982A-17H-5-W 17	156.88	175.88	175.73	5.62309	5.62367	5.59012	0.69	2.33	0	0.64	0.69		2.97	Hodell et al., 2001	C.mundulus
162-982A-17H-5-W 17	156.88	175.88	175.73	5.62309	5.62367	5.59012	0.8	2.22	0	0.64	0.8	0.8	2.86	Hodell et al., 2001	C.wuellerstorfi
162-982A-17H-5-W 27	156.98	175.98	175.83	5.62489	5.6255	5.59543	0.97	2.21	0	0.64	0.97	0.97	2.85	Hodell et al., 2001	C.wuellerstorfi
162-982A-17H-5-W 27	156.98	175.98	175.83	5.62489	5.6255	5.59543	0.55	2.27	0	0.64	0.55		2.91	Hodell et al., 2001	C.mundulus
162-982A-17H-5-W 37	157.08	176.08	175.93	5.6267	5.62733	5.60073	0.95	2.25	0	0.64	0.95	0.95	2.89	Hodell et al., 2001	C.wuellerstorfi
162-982A-17H-5-W 37	157.08	176.08	175.93	5.6267	5.62733	5.60073	0.93	2.28	0	0.64	0.93		2.92	Hodell et al., 2001	C.mundulus
162-982A-17H-5-W 47	157.18	176.18	176.03	5.6285	5.62917	5.60604	0.88	2.2	0	0.64	0.88		2.84	Hodell et al., 2001	C.mundulus
162-982A-17H-5-W 47	157.18	176.18	176.03	5.6285	5.62917	5.60604	0.95	2.16	0	0.64	0.95	0.95	2.8	Hodell et al., 2001	C.wuellerstorfi
162-982A-17H-5-W 57	157.28	176.28	176.13	5.63031	5.631	5.61135	0.83	2.14	0	0.64	0.83	0.83	2.78	Hodell et al., 2001	C.wuellerstorfi
162-982A-17H-5-W 57	157.28	176.28	176.13	5.63031	5.631	5.61135	0.87	2.11	0	0.64	0.87		2.75	Hodell et al., 2001	C.mundulus
162-982A-17H-5-W 67	157.38	176.38	176.23	5.63211	5.63283	5.61501	0.8	2.12	0	0.64	0.8	0.8	2.76	Hodell et al., 2001	C.wuellerstorfi
162-982A-17H-5-W 67	157.38	176.38	176.23	5.63211	5.63283	5.61501	0.78	2.12	0	0.64	0.78		2.76	Hodell et al., 2001	C.mundulus
162-982A-17H-5-W 77	157.48	176.48	176.33	5.63392	5.63467	5.61703	0.77	2.14	0	0.64	0.77	0.77	2.78	Hodell et al., 2001	C.wuellerstorfi
162-982A-17H-5-W 77	157.48	176.48	176.33	5.63392	5.63467	5.61703	0.8	2.18	0	0.64	0.8		2.82	Hodell et al., 2001	C.mundulus
162-982A-17H-5-W 87	157.58	176.58	176.43	5.63572	5.6365	5.61904	0.81	2.19	0	0.64	0.81		2.83	Hodell et al., 2001	C.mundulus
162-982A-17H-5-W 87	157.58	176.58	176.43	5.63572	5.6365	5.61904	0.95	2.17	0	0.64	0.95	0.95	2.81	Hodell et al., 2001	C.wuellerstorfi
162-982A-17H-5-W 97	157.68	176.68	176.53	5.63753	5.63833	5.62106	0.94	2.23	0	0.64	0.94	0.94	2.87	Hodell et al., 2001	C.wuellerstorfi
162-982A-17H-5-W 97	157.68	176.68	176.53	5.63753	5.63833	5.62106	0.83	2.29	0	0.64	0.83		2.93	Hodell et al., 2001	C.mundulus
162-982A-17H-5-W 107	157.78	176.78	176.63	5.63933	5.64017	5.62308	0.71	2.32	0	0.64	0.71		2.96	Hodell et al., 2001	C.mundulus
162-982A-17H-5-W 107	157.78	176.78	176.63	5.63933	5.64017	5.62308	0.76	2.31	0	0.64	0.76	0.76	2.95	Hodell et al., 2001	C.wuellerstorfi
162-982A-17H-5-W 117	157.88	176.88	176.73	5.64114	5.642	5.62509	0.84	2.32	0	0.64	0.84	0.84	2.96	Hodell et al., 2001	C.wuellerstorfi
162-982A-17H-5-W 117	157.88	176.88	176.73	5.64114	5.642	5.62509	0.63	2.34	0	0.64	0.63		2.98	Hodell et al., 2001	C.mundulus
162-982A-17H-5-W 127	157.98	176.98	176.83	5.64294	5.64383	5.62711	0.52	2.34	0	0.64	0.52		2.98	Hodell et al., 2001	C.mundulus
162-982A-17H-5-W 127	157.98	176.98	176.83	5.64294	5.64383	5.62711	0.77	2.28	0	0.64	0.77	0.77	2.92	Hodell et al., 2001	C.wuellerstorfi
162-982A-17H-5-W 137	158.08	177.08	176.93	5.64474	5.64567	5.62913	0.78	2.24	0	0.64	0.78	0.78	2.88	Hodell et al., 2001	C.wuellerstorfi
162-982A-17H-5-W 137	158.08	177.08	176.93	5.64474	5.64567	5.62913	0.76	2.27	0	0.64	0.76		2.91	Hodell et al., 2001	C.mundulus
162-982A-17H-5-W 147	158.18	177.18	177.03	5.64655	5.6475	5.63115	0.7	2.21	0	0.64	0.7		2.85	Hodell et al., 2001	C.mundulus
162-982A-17H-5-W 147	158.18	177.18	177.03	5.64655	5.6475	5.63115	0.95	2.14	0	0.64	0.95	0.95	2.78	Hodell et al., 2001	C.wuellerstorfi
162-982A-17H-6-W 7	158.28	177.28	177.13	5.64835	5.64933	5.63316	1.02	2.15	0	0.64	1.02	1.02	2.79	Hodell et al., 2001	C.wuellerstorfi
162-982A-17H-6-W 7	158.28	177.28	177.13	5.64835	5.64933	5.63316	0.9	2.28	0	0.64	0.9		2.92	Hodell et al., 2001	C.mundulus
162-982A-17H-6-W 17	158.38	177.38	177.23	5.65016	5.65117	5.63518	0.92	2.11	0	0.64	0.92	0.92	2.75	Hodell et al., 2001	C.wuellerstorfi
162-982A-17H-6-W 17	158.38	177.38	177.23	5.65016	5.65117	5.63518	0.68	2.2	0	0.64	0.68		2.84	Hodell et al., 2001	C.mundulus
162-982A-17H-6-W 27	158.48	177.48	177.33	5.65196	5.653	5.6372	0.74	2.12	0	0.64	0.74		2.76	Hodell et al., 2001	C.mundulus
162-982A-17H-6-W 27	158.48	177.48	177.33	5.65196	5.653	5.6372	1.07	2.01	0	0.64	1.07	1.07	2.65	Hodell et al., 2001	C.wuellerstorfi
162-982A-17H-6-W 37	158.58	177.58	177.43	5.65377	5.65497	5.63921	1.02	2.09	0	0.64	1.02	1.02	2.73	Hodell et al., 2001	C.wuellerstorfi
162-982A-17H-6-W 37	158.58	177.58	177.43	5.65377	5.65497	5.63921	0.82	2.18	0	0.64	0.82		2.82	Hodell et al., 2001	C.mundulus
162-982A-17H-6-W 47	158.68	177.68	177.53	5.65557	5.65694	5.64123	1.1	2.11	0	0.64	1.1	1.1	2.75	Hodell et al., 2001	C.wuellerstorfi
162-982B-18H-3-W 67	161.18	177.76	177.61	5.65701	5.65851	5.64284	0.81	2.13	0	0.64	0.81		2.77	Hodell et al., 2001	C.mundulus
162-982B-18H-3-W 67	161.18	177.76	177.61	5.65701	5.65851	5.64284	1.1	2.18	0	0.64	1.1	1.1	2.82	Hodell et al., 2001	C.wuellerstorfi
162-982B-18H-3-W 77	161.28	177.86	177.71	5.65882	5.66048	5.64486	0.98	2.16	0	0.64	0.98	0.98	2.8	Hodell et al., 2001	C.wuellerstorfi
162-982B-18H-3-W 77	161.28	177.86	177.71	5.65882	5.66048	5.64486	0.72	2.23	0	0.64	0.72		2.87	Hodell et al., 2001	C.mundulus
162-982B-18H-3-W 87	161.38	177.96	177.81	5.66062	5.66245	5.64688	0.94	2.17	0	0.64	0.94	0.94	2.81	Hodell et al., 2001	C.wuellerstorfi
162-982B-18H-3-W 87	161.38	177.96	177.81	5.66062	5.66245	5.64688	0.77	2.17	0	0.64	0.77		2.81	Hodell et al., 2001	C.mundulus
162-982B-18H-3-W 107	161.58	178.16	178.01	5.66423	5.66638	5.65091	0.69	2.17	0	0.64	0.69		2.81	Hodell et al., 2001	C.mundulus
162-982B-18H-3-W 107	161.58	178.16	178.01	5.66423	5.66638	5.65091	1.02	1.89	0	0.64	1.02	1.02	2.53	Hodell et al., 2001	C.wuellerstorfi
162-982B-18H-3-W 117	161.68	178.26	178.11	5.66604	5.66835	5.65293	0.79	2.12	0	0.64	0.79		2.76	Hodell et al., 2001	C.mundulus
162-982B-18H-3-W 117	161.68	178.26	178.11	5.66604	5.66835	5.65293	0.85	2.09	0	0.64	0.85	0.85	2.73	Hodell et al., 2001	C.wuellerstorfi
162-982B-18H-3-W 127	161.78	178.36	178.21	5.66784	5.67032	5.65495	0.73	2.14	0	0.64	0.73		2.78	Hodell et al., 2001	C.mundulus
162-982B-18H-3-W 127	161.78	178.36	178.21	5.66784	5.67032	5.65495	0.94	2.02	0	0.64	0.94	0.94	2.66	Hodell et al., 2001	C.wuellerstorfi
162-982B-18H-3-W 137	161.88	178.46	178.31	5.66965	5.67229	5.65696	0.7	2.12	0	0.64	0.7		2.76	Hodell et al., 2001	C.mundulus
162-982B-18H-3-W 137	161.88	178.46	178.31	5.66965	5.67229	5.65696	0.96	2.08	0	0.64	0.96	0.96	2.72	Hodell et al., 2001	C.wuellerstorfi
162-982B-18H-3-W 147	161.98	178.56	178.41	5.67145	5.67426	5.65898	0.84	2.12	0	0.64	0.84		2.76	Hodell et al., 2001	C.mundulus
162-982B-18H-3-W 147	161.98	178.56	178.41	5.67145	5.67426	5.65898	0.9	2.04	0	0.64	0.9	0.9	2.68	Hodell et al., 2001	C.wuellerstorfi
162-982B-18H-4-W 7	162.08	178.66	178.51	5.67326	5.67622	5.661	0.62	2.1	0	0.64	0.62		2.74	Hodell et al., 2001	C.mundulus
162-982B-18H-4-W 7	162.08	178.66	178.51	5.67326	5.67622	5.661	0.89	2.16	0	0.64	0.89	0.89	2.8	Hodell et al., 2001	C.wuellerstorfi
162-982B-18H-4-W 17	162.18	178.76	178.61	5.67506	5.67819	5.66302	0.77	2.07	0	0.64	0.77	0.77	2.71	Hodell et al., 2001	C.wuellerstorfi
162-982B-18H-4-W 27	162.28	178.86	178.71	5.67686	5.68016	5.66503	0.88	2.12	0	0.64	0.88	0.88	2.76	Hodell et al., 2001	C.wuellerstorfi
162-982B-18H-4-W 27	162.28	178.86	178.71	5.67686	5.68016	5.66503	0.67	2.17	0	0.64	0.67		2.81	Hodell et al., 2001	C.mundulus
162-982B-18H-4-W 37	162.38	178.96	178.81	5.67867	5.68213	5.66705	0.58	2.31	0	0.64	0.58		2.95	Hodell et al., 2001	C.mundulus
162-982B-18H-4-W 37	162.38	178.96	178.81	5.67867	5.68213	5.66705	0.83	2.16	0	0.64	0.83	0.83	2.8	Hodell et al., 2001	C.wuellerstorfi
162-982B-18H-4-W 47	162.48	179.06	178.91	5.68047	5.6841	5.66907	0.63	2.12	0	0.64	0.63		2.76	Hodell et al., 2001	C.mundulus
162-982B-18H-4-W 47	162.48	179.06	178.91	5.68047	5.6841	5.66907	0.76	2.06	0	0.64	0.76	0.76	2.7	Hodell et al., 2001	C.wuellerstorfi
162-982B-18H-4-W 57	162.58	179.16	179.01	5.68228	5.68606	5.67108	0.67	2.11	0	0.64	0.67		2.75	Hodell et al., 2001	C.mundulus
162-982B-18H-4-W 57	162.58	179.16	179.01	5.68228	5.68606	5.67108	0.92	2.11	0	0.64	0.92	0.92	2.75	Hodell et al., 2001	C.wuellerstorfi
162-982B-18H-4-W 67	162.68	179.26	179.11	5.68408	5.68803	5.6731	0.78	2.01	0	0.64	0.78		2.65	Hodell et al., 2001	C.mundulus
162-982B-18H-4-W 67	162.68	179.26	179.11	5.68408	5.68803	5.6731	0.99	2.02	0	0.64	0.99	0.99	2.66	Hodell et al., 2001	C.wuellerstorfi
162-982B-18H-4-W 77	162.78	179.36	179.21	5.68589	5.69	5.67512	0.87	1.93	0	0.64	0.87	0.87	2.57	Hodell et al., 2001	C.wuellerstorfi
162-982B-18H-4-W 77	162.78	179.36	179.21	5.68589	5.69	5.67512	0.7	1.98	0	0.64	0.7		2.62	Hodell et al., 2001	C.mundulus
162-982B-18H-4-W 87	162.88	179.46	179.31	5.68769	5.69164	5.67713	0.66	1.92	0	0.64	0.66		2.56	Hodell et al., 2001	C.mundulus
162-982B-18H-4-W 87	162.88	179.46	179.31	5.68769	5.69164	5.67713	1.09	2.19	0	0.64	1.09	1.09	2.83	Hodell et al., 2001	C.wuellerstorfi
162-982B-18H-4-W 97	162.98	179.56	179.41	5.6895	5.69328	5.67915	0.7	1.8	0	0.64	0.7		2.44	Hodell et al., 2001	C.mundulus
162-982B-18H-4-W 97	162.98	179.56	179.41	5.6895	5.69328	5.67915	0.77	1.94	0	0.64	0.77	0.77	2.58	Hodell et al., 2001	C.wuellerstorfi
162-982B-18H-4-W 107	163.08	179.66	179.51	5.6913	5.69492	5.68117	0.58	2.01	0	0.64	0.58		2.65	Hodell et al., 2001	C.mundulus
162-982B-18H-4-W 107	163.08	179.66	179.51	5.6913	5.69492	5.68117	0.7	2.26	0	0.64	0.7	0.7	2.9	Hodell et al., 2001	C.wuellerstorfi
162-982B-18H-4-W 117	163.18	179.76	179.61	5.69311	5.69656	5.68319	0.72	2.3	0	0.64	0.72		2.94	Hodell et al., 2001	C.mundulus
162-982B-18H-4-W 117	163.18	179.76	179.61	5.69311	5.69656	5.68319	0.9	2.24	0	0.64	0.9	0.9	2.88	Hodell et al., 2001	C.wuellerstorfi
162-982B-18H-4-W 127	163.28	179.86	179.71	5.69491	5.6982	5.6852	0.58	2.28	0	0.64	0.58		2.92	Hodell et al., 2001	C.mundulus
162-982B-18H-4-W 127	163.28	179.86	179.71	5.69491	5.6982	5.6852	0.73	2.13	0	0.64	0.73	0.73	2.77	Hodell et al., 2001	C.wuellerstorfi
162-982B-18H-4-W 137	163.38	179.96	179.81	5.69671	5.69984	5.68722	0.58	2.33	0	0.64	0.58		2.97	Hodell et al., 2001	C.mundulus
162-982B-18H-4-W 137	163.38	179.96	179.81	5.69671	5.69984	5.68722	0.6	2.2	0	0.64	0.6	0.6	2.84	Hodell et al., 2001	C.wuellerstorfi
162-982B-18H-4-W 147	163.48	180.06	179.91	5.69852	5.70148	5.68924	0.41	2.24	0	0.64	0.41		2.88	Hodell et al., 2001	C.mundulus
162-982B-18H-4-W 147	163.48	180.06	179.91	5.69852	5.70148	5.68924	0.57	2.18	0	0.64	0.57	0.57	2.82	Hodell et al., 2001	C.wuellerstorfi
162-982B-18H-5-W 7	163.58	180.16	180.01	5.70032	5.70312	5.69125	0.25	2.18	0	0.64	0.25		2.82	Hodell et al., 2001	C.mundulus
162-982B-18H-5-W 7	163.58	180.16	180.01	5.70032	5.70312	5.69125	0.66	2.21	0	0.64	0.66	0.66	2.85	Hodell et al., 2001	C.wuellerstorfi
162-982B-18H-5-W 17	163.68	180.26	180.11	5.70213	5.70476	5.69327	0.57	2.2	0	0.64	0.57		2.84	Hodell et al., 2001	C.mundulus
162-982B-18H-5-W 17	163.68	180.26	180.11	5.70213	5.70476	5.69327	0.74	2.08	0	0.64	0.74	0.74	2.72	Hodell et al., 2001	C.wuellerstorfi
162-982B-18H-5-W 27	163.78	180.36	180.21	5.70393	5.7064	5.69529	1	2.12	0	0.64	1	1	2.76	Hodell et al., 2001	C.wuellerstorfi
162-982B-18H-5-W 27	163.78	180.36	180.21	5.70393	5.7064	5.69529	0.55	2.22	0	0.64	0.55		2.86	Hodell et al., 2001	C.mundulus
162-982B-18H-5-W 37	163.88	180.46	180.31	5.70574	5.70804	5.69731	1.03	2.14	0	0.64	1.03	1.03	2.78	Hodell et al., 2001	C.wuellerstorfi
162-982B-18H-5-W 37	163.88	180.46	180.31	5.70574	5.70804	5.69731	0.84	2.16	0	0.64	0.84		2.8	Hodell et al., 2001	C.mundulus
162-982B-18H-5-W 47	163.98	180.56	180.41	5.70754	5.70968	5.69932	0.56	2.18	0	0.64	0.56		2.82	Hodell et al., 2001	C.mundulus
162-982B-18H-5-W 47	163.98	180.56	180.41	5.70754	5.70968	5.69932	0.89	2.05	0	0.64	0.89	0.89	2.69	Hodell et al., 2001	C.wuellerstorfi
162-982B-18H-5-W 57	164.08	180.66	180.51	5.70935	5.71132	5.70134	0.81	1.89	0	0.64	0.81		2.53	Hodell et al., 2001	C.mundulus
162-982B-18H-5-W 67	164.18	180.76	180.61	5.71115	5.71296	5.70336	0.79	2.11	0	0.64	0.79		2.75	Hodell et al., 2001	C.mundulus
162-982B-18H-5-W 77	164.28	180.86	180.71	5.71295	5.7146	5.70537	0.75	1.91	0	0.64	0.75		2.55	Hodell et al., 2001	C.mundulus
162-982B-18H-5-W 77	164.28	180.86	180.71	5.71295	5.7146	5.70537	0.96	1.86	0	0.64	0.96	0.96	2.5	Hodell et al., 2001	C.wuellerstorfi
162-982B-18H-5-W 87	164.38	180.96	180.81	5.71476	5.71624	5.70739	0.88	2.17	0	0.64	0.88		2.81	Hodell et al., 2001	C.mundulus
162-982B-18H-5-W 87	164.38	180.96	180.81	5.71476	5.71624	5.70739	0.98	2.02	0	0.64	0.98	0.98	2.66	Hodell et al., 2001	C.wuellerstorfi
162-982B-18H-5-W 97	164.48	181.06	180.91	5.71656	5.71788	5.70941	0.97	2.16	0	0.64	0.97		2.8	Hodell et al., 2001	C.mundulus
162-982B-18H-5-W 97	164.48	181.06	180.91	5.71656	5.71788	5.70941	0.93	2.25	0	0.64	0.93	0.93	2.89	Hodell et al., 2001	C.wuellerstorfi
162-982B-18H-5-W 107	164.58	181.16	181.01	5.71837	5.71952	5.71143	1.07	2.27	0	0.64	1.07	1.07	2.91	Hodell et al., 2001	C.wuellerstorfi
162-982B-18H-5-W 107	164.58	181.16	181.01	5.71837	5.71952	5.71143	0.94	2.26	0	0.64	0.94		2.9	Hodell et al., 2001	C.mundulus
162-982B-18H-5-W 117	164.68	181.26	181.11	5.72017	5.72116	5.71344	1.09	2.37	0	0.64	1.09	1.09	3.01	Hodell et al., 2001	C.wuellerstorfi
162-982B-18H-5-W 117	164.68	181.26	181.11	5.72017	5.72116	5.71344	0.9	2.38	0	0.64	0.9		3.02	Hodell et al., 2001	C.mundulus
162-982B-18H-5-W 127	164.78	181.36	181.21	5.72198	5.7228	5.71546	0.82	2.38	0	0.64	0.82		3.02	Hodell et al., 2001	C.mundulus
162-982B-18H-5-W 127	164.78	181.36	181.21	5.72198	5.7228	5.71546	0.97	2.37	0	0.64	0.97	0.97	3.01	Hodell et al., 2001	C.wuellerstorfi
162-982B-18H-5-W 137	164.88	181.46	181.31	5.72378	5.72444	5.71748	1.03	2.29	0	0.64	1.03		2.93	Hodell et al., 2001	C.mundulus
162-982B-18H-5-W 137	164.88	181.46	181.31	5.72378	5.72444	5.71748	1.13	2.36	0	0.64	1.13	1.13	3	Hodell et al., 2001	C.wuellerstorfi
162-982B-18H-5-W 147	164.98	181.56	181.41	5.72559	5.72608	5.71949	0.97	2.33	0	0.64	0.97		2.97	Hodell et al., 2001	C.mundulus
162-982B-18H-5-W 147	164.98	181.56	181.41	5.72559	5.72608	5.71949	1.07	2.32	0	0.64	1.07	1.07	2.96	Hodell et al., 2001	C.wuellerstorfi
162-982B-18H-6-W 7	165.08	181.66	181.51	5.72739	5.72772	5.72151	0.97	2.18	0	0.64	0.97	0.97	2.82	Hodell et al., 2001	C.wuellerstorfi
162-982B-18H-6-W 7	165.08	181.66	181.51	5.72739	5.72772	5.72151	0.95	2.24	0	0.64	0.95		2.88	Hodell et al., 2001	C.mundulus
162-982B-18H-6-W 17	165.18	181.76	181.61	5.7292	5.72936	5.72353	0.8	2.2	0	0.64	0.8		2.84	Hodell et al., 2001	C.mundulus
162-982B-18H-6-W 17	165.18	181.76	181.61	5.7292	5.72936	5.72353	1.06	2.18	0	0.64	1.06	1.06	2.82	Hodell et al., 2001	C.wuellerstorfi
162-982B-18H-6-W 27	165.28	181.86	181.71	5.731	5.731	5.72555	0.94	2.1	0	0.64	0.94	0.94	2.74	Hodell et al., 2001	C.wuellerstorfi
162-982B-18H-6-W 27	165.28	181.86	181.71	5.731	5.731	5.72555	0.78	2.11	0	0.64	0.78		2.75	Hodell et al., 2001	C.mundulus
162-982B-18H-6-W 37	165.38	181.96	181.81	5.73294	5.73269	5.72756	0.7	2.13	0	0.64	0.7		2.77	Hodell et al., 2001	C.mundulus
162-982B-18H-6-W 37	165.38	181.96	181.81	5.73294	5.73269	5.72756	0.91	2.08	0	0.64	0.91	0.91	2.72	Hodell et al., 2001	C.wuellerstorfi
162-982B-18H-6-W 47	165.48	182.06	181.91	5.73489	5.73438	5.72958	0.55	2.18	0	0.64	0.55		2.82	Hodell et al., 2001	C.mundulus
162-982B-18H-6-W 47	165.48	182.06	181.91	5.73489	5.73438	5.72958	0.9	1.81	0	0.64	0.9	0.9	2.45	Hodell et al., 2001	C.wuellerstorfi
162-982B-18H-6-W 57	165.58	182.16	182.01	5.73683	5.73607	5.7316	0.64	2.16	0	0.64	0.64		2.8	Hodell et al., 2001	C.mundulus
162-982B-18H-6-W 57	165.58	182.16	182.01	5.73683	5.73607	5.7316	1.01	2.15	0	0.64	1.01	1.01	2.79	Hodell et al., 2001	C.wuellerstorfi
162-982A-18H-2-W 97	162.68	182.18	182.03	5.73722	5.7364	5.732	0.73	2.11	0	0.64	0.73	0.73	2.75	Hodell et al., 2001	C.wuellerstorfi
162-982A-18H-2-W 97	162.68	182.18	182.03	5.73722	5.7364	5.732	0.69	2.18	0	0.64	0.69		2.82	Hodell et al., 2001	C.mundulus
162-982A-18H-2-W 107	162.78	182.28	182.13	5.73916	5.73809	5.73015	0.61	2.22	0	0.64	0.61		2.86	Hodell et al., 2001	C.mundulus
162-982A-18H-2-W 107	162.78	182.28	182.13	5.73916	5.73809	5.73015	0.83	2.19	0	0.64	0.83	0.83	2.83	Hodell et al., 2001	C.wuellerstorfi
162-982A-18H-2-W 117	162.88	182.38	182.23	5.74111	5.73978	5.73232	0.8	2.21	0	0.64	0.8	0.8	2.85	Hodell et al., 2001	C.wuellerstorfi
162-982A-18H-2-W 117	162.88	182.38	182.23	5.74111	5.73978	5.73232	0.52	2.34	0	0.64	0.52		2.98	Hodell et al., 2001	C.mundulus
162-982A-18H-2-W 127	162.98	182.48	182.33	5.74305	5.74147	5.73449	0.83	2.36	0	0.64	0.83	0.83	3	Hodell et al., 2001	C.wuellerstorfi
162-982A-18H-2-W 127	162.98	182.48	182.33	5.74305	5.74147	5.73449	0.57	2.29	0	0.64	0.57		2.93	Hodell et al., 2001	C.mundulus
162-982A-18H-2-W 137	163.08	182.58	182.43	5.74499	5.74316	5.73666	0.8	2.46	0	0.64	0.8	0.8	3.1	Hodell et al., 2001	C.wuellerstorfi
162-982A-18H-2-W 137	163.08	182.58	182.43	5.74499	5.74316	5.73666	0.36	2.54	0	0.64	0.36		3.18	Hodell et al., 2001	C.mundulus
162-982A-18H-2-W 147	163.18	182.68	182.53	5.74694	5.74485	5.73883	0.73	2.52	0	0.64	0.73		3.16	Hodell et al., 2001	C.mundulus
162-982A-18H-2-W 147	163.18	182.68	182.53	5.74694	5.74485	5.73883	0.47	2.52	0	0.64	0.47	0.47	3.16	Hodell et al., 2001	C.wuellerstorfi
162-982A-18H-3-W 7	163.28	182.78	182.63	5.74888	5.74654	5.74101	0.73	2.59	0	0.64	0.73	0.73	3.23	Hodell et al., 2001	C.wuellerstorfi
162-982A-18H-3-W 7	163.28	182.78	182.63	5.74888	5.74654	5.74101	0.4	2.68	0	0.64	0.4		3.32	Hodell et al., 2001	C.mundulus
162-982A-18H-3-W 17	163.38	182.88	182.73	5.75082	5.74823	5.74318	0.31	2.65	0	0.64	0.31		3.29	Hodell et al., 2001	C.mundulus
162-982A-18H-3-W 17	163.38	182.88	182.73	5.75082	5.74823	5.74318	0.67	2.55	0	0.64	0.67	0.67	3.19	Hodell et al., 2001	C.wuellerstorfi
162-982A-18H-3-W 27	163.48	182.98	182.83	5.75277	5.74991	5.74535	0.66	2.6	0	0.64	0.66	0.66	3.24	Hodell et al., 2001	C.wuellerstorfi
162-982A-18H-3-W 27	163.48	182.98	182.83	5.75277	5.74991	5.74535	0.47	2.62	0	0.64	0.47		3.26	Hodell et al., 2001	C.mundulus
162-982A-18H-3-W 37	163.58	183.08	182.93	5.75471	5.7516	5.74752	0.66	2.52	0	0.64	0.66	0.66	3.16	Hodell et al., 2001	C.wuellerstorfi
162-982A-18H-3-W 37	163.58	183.08	182.93	5.75471	5.7516	5.74752	0.25	2.54	0	0.64	0.25		3.18	Hodell et al., 2001	C.mundulus
162-982A-18H-3-W 47	163.68	183.18	183.03	5.75665	5.75329	5.74969	0.58	2.57	0	0.64	0.58	0.58	3.21	Hodell et al., 2001	C.wuellerstorfi
162-982A-18H-3-W 47	163.68	183.18	183.03	5.75665	5.75329	5.74969	0.25	2.6	0	0.64	0.25		3.24	Hodell et al., 2001	C.mundulus
162-982A-18H-3-W 57	163.78	183.28	183.13	5.7586	5.75498	5.75186	0.54	2.63	0	0.64	0.54	0.54	3.27	Hodell et al., 2001	C.wuellerstorfi
162-982A-18H-3-W 57	163.78	183.28	183.13	5.7586	5.75498	5.75186	0.43	2.65	0	0.64	0.43		3.29	Hodell et al., 2001	C.mundulus
162-982A-18H-3-W 67	163.88	183.38	183.23	5.76054	5.75667	5.75403	0.58	2.66	0	0.64	0.58	0.58	3.3	Hodell et al., 2001	C.wuellerstorfi
162-982A-18H-3-W 77	163.98	183.48	183.33	5.76249	5.75836	5.75621	0.65	2.69	0	0.64	0.65	0.65	3.33	Hodell et al., 2001	C.wuellerstorfi
162-982A-18H-3-W 77	163.98	183.48	183.33	5.76249	5.75836	5.75621	0.57	2.7	0	0.64	0.57		3.34	Hodell et al., 2001	C.mundulus
162-982A-18H-3-W 87	164.08	183.58	183.43	5.76443	5.76005	5.75838	0.91	2.57	0	0.64	0.91	0.91	3.21	Hodell et al., 2001	C.wuellerstorfi
162-982A-18H-3-W 87	164.08	183.58	183.43	5.76443	5.76005	5.75838	0.41	2.54	0	0.64	0.41		3.18	Hodell et al., 2001	C.mundulus
162-982A-18H-3-W 97	164.18	183.68	183.53	5.76637	5.76173	5.76055	0.83	2.54	0	0.64	0.83	0.83	3.18	Hodell et al., 2001	C.wuellerstorfi
162-982A-18H-3-W 97	164.18	183.68	183.53	5.76637	5.76173	5.76055	0.6	2.53	0	0.64	0.6		3.17	Hodell et al., 2001	C.mundulus
162-982A-18H-3-W 107	164.28	183.78	183.63	5.76832	5.76342	5.76272	0.47	2.34	0	0.64	0.47		2.98	Hodell et al., 2001	C.mundulus
162-982A-18H-3-W 107	164.28	183.78	183.63	5.76832	5.76342	5.76272	0.86	2.38	0	0.64	0.86	0.86	3.02	Hodell et al., 2001	C.wuellerstorfi
162-982A-18H-3-W 117	164.38	183.88	183.73	5.77026	5.76511	5.76489	0.52	2.2	0	0.64	0.52		2.84	Hodell et al., 2001	C.mundulus
162-982A-18H-3-W 117	164.38	183.88	183.73	5.77026	5.76511	5.76489	0.89	2.29	0	0.64	0.89	0.89	2.93	Hodell et al., 2001	C.wuellerstorfi
162-982A-18H-3-W 127	164.48	183.98	183.83	5.7722	5.7668	5.76706	0.7	2.18	0	0.64	0.7		2.82	Hodell et al., 2001	C.mundulus
162-982A-18H-3-W 137	164.58	184.08	183.93	5.77415	5.76849	5.76923	1.02	2.1	0	0.64	1.02	1.02	2.74	Hodell et al., 2001	C.wuellerstorfi
162-982A-18H-3-W 137	164.58	184.08	183.93	5.77415	5.76849	5.76923	0.7	2.13	0	0.64	0.7		2.77	Hodell et al., 2001	C.mundulus
162-982A-18H-3-W 147	164.68	184.18	184.03	5.77609	5.77018	5.77141	0.66	2.01	0	0.64	0.66		2.65	Hodell et al., 2001	C.mundulus
162-982A-18H-3-W 147	164.68	184.18	184.03	5.77609	5.77018	5.77141	1.02	2.11	0	0.64	1.02	1.02	2.75	Hodell et al., 2001	C.wuellerstorfi
162-982A-18H-4-W 7	164.78	184.28	184.13	5.77803	5.77187	5.77358	0.92	2.15	0	0.64	0.92	0.92	2.79	Hodell et al., 2001	C.wuellerstorfi
162-982A-18H-4-W 7	164.78	184.28	184.13	5.77803	5.77187	5.77358	0.79	2.06	0	0.64	0.79		2.7	Hodell et al., 2001	C.mundulus
162-982A-18H-4-W 17	164.88	184.38	184.23	5.77998	5.77356	5.77575	0.89	2.17	0	0.64	0.89	0.89	2.81	Hodell et al., 2001	C.wuellerstorfi
162-982A-18H-4-W 17	164.88	184.38	184.23	5.77998	5.77356	5.77575	0.36	2.17	0	0.64	0.36		2.81	Hodell et al., 2001	C.mundulus
162-982A-18H-4-W 27	164.98	184.48	184.33	5.78192	5.77525	5.77792	0.95	2.12	0	0.64	0.95	0.95	2.76	Hodell et al., 2001	C.wuellerstorfi
162-982A-18H-4-W 27	164.98	184.48	184.33	5.78192	5.77525	5.77792	0.38	2.22	0	0.64	0.38		2.86	Hodell et al., 2001	C.mundulus
162-982A-18H-4-W 37	165.08	184.58	184.43	5.78386	5.77693	5.78009	0.3	2.15	0	0.64	0.3		2.79	Hodell et al., 2001	C.mundulus
162-982A-18H-4-W 37	165.08	184.58	184.43	5.78386	5.77693	5.78009	0.71	1.98	0	0.64	0.71	0.71	2.62	Hodell et al., 2001	C.wuellerstorfi
162-982A-18H-4-W 47	165.18	184.68	184.53	5.78581	5.77862	5.78226	0.87	2.08	0	0.64	0.87	0.87	2.72	Hodell et al., 2001	C.wuellerstorfi
162-982A-18H-4-W 47	165.18	184.68	184.53	5.78581	5.77862	5.78226	0.43	2.16	0	0.64	0.43		2.8	Hodell et al., 2001	C.mundulus
162-982A-18H-4-W 57	165.28	184.78	184.63	5.78775	5.78031	5.78069	0.48	2.12	0	0.64	0.48		2.76	Hodell et al., 2001	C.mundulus
162-982A-18H-4-W 57	165.28	184.78	184.63	5.78775	5.78031	5.78069	0.7	2.03	0	0.64	0.7	0.7	2.67	Hodell et al., 2001	C.wuellerstorfi
162-982A-18H-4-W 67	165.38	184.88	184.73	5.78969	5.782	5.78286	0.42	2.28	0	0.64	0.42		2.92	Hodell et al., 2001	C.mundulus
162-982A-18H-4-W 67	165.38	184.88	184.73	5.78969	5.782	5.78286	0.71	1.97	0	0.64	0.71	0.71	2.61	Hodell et al., 2001	C.wuellerstorfi
162-982A-18H-4-W 77	165.48	184.98	184.83	5.79164	5.7842	5.78502	0.31	2.41	0	0.64	0.31		3.05	Hodell et al., 2001	C.mundulus
162-982A-18H-4-W 77	165.48	184.98	184.83	5.79164	5.7842	5.78502	0.61	2.23	0	0.64	0.61	0.61	2.87	Hodell et al., 2001	C.wuellerstorfi
162-982A-18H-4-W 87	165.58	185.08	184.93	5.79358	5.7864	5.78718	0.53	2.63	0	0.64	0.53	0.53	3.27	Hodell et al., 2001	C.wuellerstorfi
162-982A-18H-4-W 87	165.58	185.08	184.93	5.79358	5.7864	5.78718	0.32	2.47	0	0.64	0.32		3.11	Hodell et al., 2001	C.mundulus
162-982A-18H-4-W 97	165.68	185.18	185.03	5.79553	5.7886	5.78935	0.37	2.39	0	0.64	0.37		3.03	Hodell et al., 2001	C.mundulus
162-982A-18H-4-W 97	165.68	185.18	185.03	5.79553	5.7886	5.78935	0.45	2.42	0	0.64	0.45	0.45	3.06	Hodell et al., 2001	C.wuellerstorfi
162-982A-18H-4-W 107	165.78	185.28	185.13	5.79747	5.7908	5.79151	0.08	2.47	0	0.64	0.08		3.11	Hodell et al., 2001	C.mundulus
162-982A-18H-4-W 107	165.78	185.28	185.13	5.79747	5.7908	5.79151	0.6	2.48	0	0.64	0.6	0.6	3.12	Hodell et al., 2001	C.wuellerstorfi
162-982A-18H-4-W 117	165.88	185.38	185.23	5.79941	5.793	5.79367	0.46	2.42	0	0.64	0.46	0.46	3.06	Hodell et al., 2001	C.wuellerstorfi
162-982A-18H-4-W 117	165.88	185.38	185.23	5.79941	5.793	5.79367	0.46	2.41	0	0.64	0.46		3.05	Hodell et al., 2001	C.mundulus
162-982A-18H-4-W 127	165.98	185.48	185.33	5.80136	5.7952	5.79583	-0.1	2.31	0	0.64	-0.1		2.95	Hodell et al., 2001	C.mundulus
162-982A-18H-4-W 127	165.98	185.48	185.33	5.80136	5.7952	5.79583	0.33	2.43	0	0.64	0.33	0.33	3.07	Hodell et al., 2001	C.wuellerstorfi
162-982A-18H-4-W 137	166.08	185.58	185.43	5.8033	5.7974	5.798	0.55	2.35	0	0.64	0.55	0.55	2.99	Hodell et al., 2001	C.wuellerstorfi
162-982A-18H-4-W 137	166.08	185.58	185.43	5.8033	5.7974	5.798	-0.14	2.29	0	0.64	-0.14		2.93	Hodell et al., 2001	C.mundulus
162-982A-18H-4-W 143	166.14	185.64	185.49	5.80447	5.79872	5.79929	0.49	2.14	0	0.64	0.49		2.78	Hodell et al., 2001	C.mundulus
162-982A-18H-4-W 143	166.14	185.64	185.49	5.80447	5.79872	5.79929	0.73	2.09	0	0.64	0.73	0.73	2.73	Hodell et al., 2001	C.wuellerstorfi
162-982A-18H-5-W 7	166.28	185.78	185.63	5.80719	5.8018	5.80232	0.8	2.14	0	0.64	0.8	0.8	2.78	Hodell et al., 2001	C.wuellerstorfi
162-982A-18H-5-W 7	166.28	185.78	185.63	5.80719	5.8018	5.80232	0.46	2.04	0	0.64	0.46		2.68	Hodell et al., 2001	C.mundulus
162-982A-18H-5-W 17	166.38	185.88	185.73	5.80913	5.804	5.80449	0.77	2.09	0	0.64	0.77	0.77	2.73	Hodell et al., 2001	C.wuellerstorfi
162-982A-18H-5-W 17	166.38	185.88	185.73	5.80913	5.804	5.80449	0.45	2.08	0	0.64	0.45		2.72	Hodell et al., 2001	C.mundulus
162-982A-18H-5-W 27	166.48	185.98	185.83	5.81107	5.8062	5.80681	0.63	2.05	0	0.64	0.63		2.69	Hodell et al., 2001	C.mundulus
162-982A-18H-5-W 27	166.48	185.98	185.83	5.81107	5.8062	5.80681	0.7	1.94	0	0.64	0.7	0.7	2.58	Hodell et al., 2001	C.wuellerstorfi
162-982A-18H-5-W 37	166.58	186.08	185.93	5.81302	5.8084	5.80951	0.49	2.09	0	0.64	0.49		2.73	Hodell et al., 2001	C.mundulus
162-982A-18H-5-W 37	166.58	186.08	185.93	5.81302	5.8084	5.80951	0.84	2.24	0	0.64	0.84	0.84	2.88	Hodell et al., 2001	C.wuellerstorfi
162-982A-18H-5-W 47	166.68	186.18	186.03	5.81496	5.8106	5.81222	0.75	2.12	0	0.64	0.75	0.75	2.76	Hodell et al., 2001	C.wuellerstorfi
162-982A-18H-5-W 47	166.68	186.18	186.03	5.81496	5.8106	5.81222	0.37	2.17	0	0.64	0.37		2.81	Hodell et al., 2001	C.mundulus
162-982A-18H-5-W 57	166.78	186.28	186.13	5.8169	5.8128	5.81492	0.32	2.16	0	0.64	0.32		2.8	Hodell et al., 2001	C.mundulus
162-982A-18H-5-W 57	166.78	186.28	186.13	5.8169	5.8128	5.81492	0.45	2.17	0	0.64	0.45	0.45	2.81	Hodell et al., 2001	C.wuellerstorfi
162-982A-18H-5-W 67	166.88	186.38	186.23	5.81885	5.815	5.81762	0.27	2.39	0	0.64	0.27		3.03	Hodell et al., 2001	C.mundulus
162-982A-18H-5-W 67	166.88	186.38	186.23	5.81885	5.815	5.81762	0.71	2.24	0	0.64	0.71	0.71	2.88	Hodell et al., 2001	C.wuellerstorfi
162-982A-18H-5-W 77	166.98	186.48	186.33	5.82079	5.8172	5.82032	0.65	2.08	0	0.64	0.65	0.65	2.72	Hodell et al., 2001	C.wuellerstorfi
162-982A-18H-5-W 77	166.98	186.48	186.33	5.82079	5.8172	5.82032	-0.03	2.2	0	0.64	-0.03		2.84	Hodell et al., 2001	C.mundulus
162-982A-18H-5-W 87	167.08	186.58	186.43	5.82273	5.8194	5.82303	0.67	1.84	0	0.64	0.67	0.67	2.48	Hodell et al., 2001	C.wuellerstorfi
162-982A-18H-5-W 87	167.08	186.58	186.43	5.82273	5.8194	5.82303	0.61	2.05	0	0.64	0.61		2.69	Hodell et al., 2001	C.mundulus
162-982A-18H-5-W 97	167.18	186.68	186.53	5.82468	5.8216	5.82573	0.43	2.11	0	0.64	0.43		2.75	Hodell et al., 2001	C.mundulus
162-982A-18H-5-W 97	167.18	186.68	186.53	5.82468	5.8216	5.82573	0.75	2.19	0	0.64	0.75	0.75	2.83	Hodell et al., 2001	C.wuellerstorfi
162-982A-18H-5-W 107	167.28	186.78	186.63	5.82662	5.8238	5.82753	0.45	1.99	0	0.64	0.45		2.63	Hodell et al., 2001	C.mundulus
162-982A-18H-5-W 107	167.28	186.78	186.63	5.82662	5.8238	5.82753	0.76	2.16	0	0.64	0.76	0.76	2.8	Hodell et al., 2001	C.wuellerstorfi
162-982A-18H-5-W 117	167.38	186.88	186.73	5.82856	5.826	5.82924	0.62	2.16	0	0.64	0.62		2.8	Hodell et al., 2001	C.mundulus
162-982A-18H-5-W 117	167.38	186.88	186.73	5.82856	5.826	5.82924	0.42	2.09	0	0.64	0.42	0.42	2.73	Hodell et al., 2001	C.wuellerstorfi
162-982A-18H-5-W 127	167.48	186.98	186.83	5.83051	5.8282	5.83095	0.56	2.3	0	0.64	0.56	0.56	2.94	Hodell et al., 2001	C.wuellerstorfi
162-982A-18H-5-W 127	167.48	186.98	186.83	5.83051	5.8282	5.83095	0.25	2.22	0	0.64	0.25		2.86	Hodell et al., 2001	C.mundulus
162-982A-18H-5-W 137	167.58	187.08	186.93	5.83245	5.8304	5.83265	0.15	2.52	0	0.64	0.15		3.16	Hodell et al., 2001	C.mundulus
162-982A-18H-5-W 137	167.58	187.08	186.93	5.83245	5.8304	5.83265	0.71	2.46	0	0.64	0.71	0.71	3.1	Hodell et al., 2001	C.wuellerstorfi
162-982A-18H-5-W 147	167.68	187.18	187.03	5.8344	5.8326	5.83436	0.38	2.5	0	0.64	0.38		3.14	Hodell et al., 2001	C.mundulus
162-982A-18H-6-W 7	167.78	187.28	187.13	5.83634	5.8348	5.83606	0.1	2.36	0	0.64	0.1		3	Hodell et al., 2001	C.mundulus
162-982A-18H-6-W 7	167.78	187.28	187.13	5.83634	5.8348	5.83606	0.56	2.52	0	0.64	0.56	0.56	3.16	Hodell et al., 2001	C.wuellerstorfi
162-982A-18H-6-W 17	167.88	187.38	187.23	5.83828	5.837	5.83777	0.32	2.53	0	0.64	0.32		3.17	Hodell et al., 2001	C.mundulus
162-982A-18H-6-W 17	167.88	187.38	187.23	5.83828	5.837	5.83777	0.59	2.43	0	0.64	0.59	0.59	3.07	Hodell et al., 2001	C.wuellerstorfi
162-982A-18H-6-W 27	167.98	187.48	187.33	5.84023	5.8392	5.83947	0.29	2.47	0	0.64	0.29	0.29	3.11	Hodell et al., 2001	C.wuellerstorfi
162-982A-18H-6-W 27	167.98	187.48	187.33	5.84023	5.8392	5.83947	0.03	2.48	0	0.64	0.03		3.12	Hodell et al., 2001	C.mundulus
162-982A-18H-6-W 37	168.08	187.58	187.43	5.84217	5.8414	5.84118	0.25	2.4	0	0.64	0.25		3.04	Hodell et al., 2001	C.mundulus
162-982A-18H-6-W 47	168.18	187.68	187.53	5.84411	5.8436	5.84288	0.33	2.35	0	0.64	0.33		2.99	Hodell et al., 2001	C.mundulus
162-982A-18H-6-W 47	168.18	187.68	187.53	5.84411	5.8436	5.84288	0.71	2.36	0	0.64	0.71	0.71	3	Hodell et al., 2001	C.wuellerstorfi
162-982A-18H-6-W 57	168.28	187.78	187.63	5.84606	5.8458	5.84459	0.65	2.29	0	0.64	0.65		2.93	Hodell et al., 2001	C.mundulus
162-982A-18H-6-W 67	168.38	187.88	187.73	5.848	5.848	5.84629	0.58	1.84	0	0.64	0.58		2.48	Hodell et al., 2001	C.mundulus
162-982A-18H-6-W 67	168.38	187.88	187.73	5.848	5.848	5.84629	0.89	1.91	0	0.64	0.89	0.89	2.55	Hodell et al., 2001	C.wuellerstorfi
162-982A-18H-6-W 77	168.48	187.98	187.83	5.85059	5.85118	5.848	0.92	2.18	0	0.64	0.92	0.92	2.82	Hodell et al., 2001	C.wuellerstorfi
162-982A-18H-6-W 77	168.48	187.98	187.83	5.85059	5.85118	5.848	0.58	2.2	0	0.64	0.58		2.84	Hodell et al., 2001	C.mundulus
162-982A-18H-6-W 87	168.58	188.08	187.93	5.85319	5.85437	5.85139	1.03	2.14	0	0.64	1.03	1.03	2.78	Hodell et al., 2001	C.wuellerstorfi
162-982A-18H-6-W 87	168.58	188.08	187.93	5.85319	5.85437	5.85139	0.55	2.2	0	0.64	0.55		2.84	Hodell et al., 2001	C.mundulus
162-982A-18H-6-W 97	168.68	188.18	188.03	5.85578	5.85755	5.85479	0.59	2.15	0	0.64	0.59		2.79	Hodell et al., 2001	C.mundulus
162-982A-18H-6-W 97	168.68	188.18	188.03	5.85578	5.85755	5.85479	0.96	2.07	0	0.64	0.96	0.96	2.71	Hodell et al., 2001	C.wuellerstorfi
162-982A-18H-6-W 107	168.78	188.28	188.13	5.85837	5.86074	5.85818	0.97	2.19	0	0.64	0.97	0.97	2.83	Hodell et al., 2001	C.wuellerstorfi
162-982A-18H-6-W 107	168.78	188.28	188.13	5.85837	5.86074	5.85818	0.67	2.13	0	0.64	0.67		2.77	Hodell et al., 2001	C.mundulus
162-982A-18H-6-W 117	168.88	188.38	188.23	5.86097	5.86392	5.86157	0.63	2.31	0	0.64	0.63		2.95	Hodell et al., 2001	C.mundulus
162-982A-18H-6-W 127	168.98	188.48	188.33	5.86356	5.86711	5.86496	0.32	2.1	0	0.64	0.32		2.74	Hodell et al., 2001	C.mundulus
162-982A-18H-6-W 127	168.98	188.48	188.33	5.86356	5.86711	5.86496	0.89	2.32	0	0.64	0.89	0.89	2.96	Hodell et al., 2001	C.wuellerstorfi
162-982B-19H-3-W 87	170.88	188.67	188.4	5.86538	5.86934	5.87193	0.42	2.19	0	0.64	0.42		2.83	Hodell et al., 2001	C.mundulus
162-982A-18H-6-W 137	169.08	188.58	188.43	5.86616	5.87029	5.86852	0.36	2.36	0	0.64	0.36		3	Hodell et al., 2001	C.mundulus
162-982B-19H-3-W 97	170.98	188.77	188.5	5.86797	5.87252	5.87572	0.71	2.13	0	0.64	0.71	0.71	2.77	Hodell et al., 2001	C.wuellerstorfi
162-982B-19H-3-W 97	170.98	188.77	188.5	5.86797	5.87252	5.87572	0.55	2.29	0	0.64	0.55		2.93	Hodell et al., 2001	C.mundulus
162-982B-19H-3-W 107	171.08	188.87	188.6	5.87056	5.87571	5.8789	0.69	2.17	0	0.64	0.69	0.69	2.81	Hodell et al., 2001	C.wuellerstorfi
162-982B-19H-3-W 107	171.08	188.87	188.6	5.87056	5.87571	5.8789	0.55	2.14	0	0.64	0.55		2.78	Hodell et al., 2001	C.mundulus
162-982B-19H-3-W 117	171.18	188.97	188.7	5.87316	5.87889	5.88116	0.76	2.16	0	0.64	0.76	0.76	2.8	Hodell et al., 2001	C.wuellerstorfi
162-982B-19H-3-W 117	171.18	188.97	188.7	5.87316	5.87889	5.88116	0.41	2.24	0	0.64	0.41		2.88	Hodell et al., 2001	C.mundulus
162-982B-19H-3-W 127	171.28	189.07	188.8	5.87575	5.88208	5.88342	0.73	2.19	0	0.64	0.73	0.73	2.83	Hodell et al., 2001	C.wuellerstorfi
162-982B-19H-3-W 127	171.28	189.07	188.8	5.87575	5.88208	5.88342	0.29	2.32	0	0.64	0.29		2.96	Hodell et al., 2001	C.mundulus
162-982B-19H-3-W 137	171.38	189.17	188.9	5.87835	5.88526	5.88568	0.33	1.9	0	0.64	0.33		2.54	Hodell et al., 2001	C.mundulus
162-982B-19H-3-W 147	171.48	189.27	189	5.88094	5.88845	5.88794	0.36	2.14	0	0.64	0.36		2.78	Hodell et al., 2001	C.mundulus
162-982B-19H-4-W 7	171.58	189.37	189.1	5.88353	5.89163	5.89019	0.76	2.19	0	0.64	0.76	0.76	2.83	Hodell et al., 2001	C.wuellerstorfi
162-982B-19H-4-W 7	171.58	189.37	189.1	5.88353	5.89163	5.89019	0.52	2.11	0	0.64	0.52		2.75	Hodell et al., 2001	C.mundulus
162-982B-19H-4-W 17	171.68	189.47	189.2	5.88613	5.89481	5.89245	0.58	2.16	0	0.64	0.58		2.8	Hodell et al., 2001	C.mundulus
162-982B-19H-4-W 17	171.68	189.47	189.2	5.88613	5.89481	5.89245	0.99	1.87	0	0.64	0.99	0.99	2.51	Hodell et al., 2001	C.wuellerstorfi
162-982B-19H-4-W 27	171.78	189.57	189.3	5.88872	5.898	5.89471	0.56	1.81	0	0.64	0.56	0.56	2.45	Hodell et al., 2001	C.wuellerstorfi
162-982B-19H-4-W 27	171.78	189.57	189.3	5.88872	5.898	5.89471	0.47	2.22	0	0.64	0.47		2.86	Hodell et al., 2001	C.mundulus
162-982B-19H-4-W 37	171.88	189.67	189.4	5.89131	5.9001	5.89697	0.44	2.08	0	0.64	0.44		2.72	Hodell et al., 2001	C.mundulus
162-982B-19H-4-W 47	171.98	189.77	189.5	5.89391	5.90221	5.89933	0.21	2.16	0	0.64	0.21		2.8	Hodell et al., 2001	C.mundulus
162-982B-19H-4-W 47	171.98	189.77	189.5	5.89391	5.90221	5.89933	0.32	2.03	0	0.64	0.32	0.32	2.67	Hodell et al., 2001	C.wuellerstorfi
162-982B-19H-4-W 57	172.08	189.87	189.6	5.8965	5.90432	5.90267	0.58	2.21	0	0.64	0.58	0.58	2.85	Hodell et al., 2001	C.wuellerstorfi
162-982B-19H-4-W 57	172.08	189.87	189.6	5.8965	5.90432	5.90267	0.31	2.1	0	0.64	0.31		2.74	Hodell et al., 2001	C.mundulus
162-982B-19H-4-W 67	172.18	189.97	189.7	5.8991	5.90642	5.906	-0.06	2.43	0	0.64	-0.06		3.07	Hodell et al., 2001	C.mundulus
162-982B-19H-4-W 77	172.28	190.07	189.8	5.90169	5.90853	5.90933	0.39	1.93	0	0.64	0.39	0.39	2.57	Hodell et al., 2001	C.wuellerstorfi
162-982B-19H-4-W 77	172.28	190.07	189.8	5.90169	5.90853	5.90933	-0.29	2.36	0	0.64	-0.29		3	Hodell et al., 2001	C.mundulus
162-982B-19H-4-W 87	172.38	190.17	189.9	5.90428	5.91063	5.91174	-0.32	2.34	0	0.64	-0.32		2.98	Hodell et al., 2001	C.mundulus
162-982B-19H-4-W 97	172.48	190.27	190	5.90688	5.91274	5.91391	-0.26	2.28	0	0.64	-0.26		2.92	Hodell et al., 2001	C.mundulus
162-982B-19H-4-W 97	172.48	190.27	190	5.90688	5.91274	5.91391	0.75	2.03	0	0.64	0.75	0.75	2.67	Hodell et al., 2001	C.wuellerstorfi
162-982B-19H-4-W 107	172.58	190.37	190.1	5.90947	5.91484	5.91609	0.3	2.2	0	0.64	0.3		2.84	Hodell et al., 2001	C.mundulus
162-982B-19H-4-W 117	172.68	190.47	190.2	5.91206	5.91695	5.91826	0.39	2.21	0	0.64	0.39		2.85	Hodell et al., 2001	C.mundulus
162-982B-19H-4-W 117	172.68	190.47	190.2	5.91206	5.91695	5.91826	1.05	1.94	0	0.64	1.05	1.05	2.58	Hodell et al., 2001	C.wuellerstorfi
162-982B-19H-4-W 127	172.78	190.57	190.3	5.91466	5.91905	5.92046	0.56	2.17	0	0.64	0.56		2.81	Hodell et al., 2001	C.mundulus
162-982B-19H-4-W 127	172.78	190.57	190.3	5.91466	5.91905	5.92046	0.76	2.08	0	0.64	0.76	0.76	2.72	Hodell et al., 2001	C.wuellerstorfi
162-982B-19H-4-W 137	172.88	190.67	190.4	5.91725	5.92116	5.92278	0.71	2.09	0	0.64	0.71		2.73	Hodell et al., 2001	C.mundulus
162-982B-19H-4-W 147	172.98	190.77	190.5	5.91984	5.92326	5.9251	0.79	2.15	0	0.64	0.79		2.79	Hodell et al., 2001	C.mundulus
162-982B-19H-4-W 147	172.98	190.77	190.5	5.91984	5.92326	5.9251	0.78	2.25	0	0.64	0.78	0.78	2.89	Hodell et al., 2001	C.wuellerstorfi
162-982B-19H-5-W 7	173.08	190.87	190.6	5.92244	5.92537	5.92741	0.75	2.25	0	0.64	0.75		2.89	Hodell et al., 2001	C.mundulus
162-982B-19H-5-W 7	173.08	190.87	190.6	5.92244	5.92537	5.92741	0.78	2.23	0	0.64	0.78	0.78	2.87	Hodell et al., 2001	C.wuellerstorfi
162-982B-19H-5-W 17	173.18	190.97	190.7	5.92503	5.92747	5.92973	0.7	1.99	0	0.64	0.7	0.7	2.63	Hodell et al., 2001	C.wuellerstorfi
162-982B-19H-5-W 17	173.18	190.97	190.7	5.92503	5.92747	5.92973	0.54	2.27	0	0.64	0.54		2.91	Hodell et al., 2001	C.mundulus
162-982B-19H-5-W 27	173.28	191.07	190.8	5.92763	5.92958	5.93205	0.86	2.01	0	0.64	0.86	0.86	2.65	Hodell et al., 2001	C.wuellerstorfi
162-982B-19H-5-W 27	173.28	191.07	190.8	5.92763	5.92958	5.93205	0.81	2.04	0	0.64	0.81		2.68	Hodell et al., 2001	C.mundulus
162-982B-19H-5-W 37	173.38	191.17	190.9	5.93022	5.93168	5.93437	0.62	2.07	0	0.64	0.62		2.71	Hodell et al., 2001	C.mundulus
162-982B-19H-5-W 37	173.38	191.17	190.9	5.93022	5.93168	5.93437	0.81	2.01	0	0.64	0.81	0.81	2.65	Hodell et al., 2001	C.wuellerstorfi
162-982B-19H-5-W 47	173.48	191.27	191	5.93281	5.93379	5.93668	0.77	2.07	0	0.64	0.77		2.71	Hodell et al., 2001	C.mundulus
162-982B-19H-5-W 47	173.48	191.27	191	5.93281	5.93379	5.93668	0.8	2.08	0	0.64	0.8	0.8	2.72	Hodell et al., 2001	C.wuellerstorfi
162-982B-19H-5-W 57	173.58	191.37	191.1	5.93541	5.93589	5.939	0.84	1.9	0	0.64	0.84	0.84	2.54	Hodell et al., 2001	C.wuellerstorfi
162-982B-19H-5-W 57	173.58	191.37	191.1	5.93541	5.93589	5.939	0.65	2.01	0	0.64	0.65		2.65	Hodell et al., 2001	C.mundulus
162-982B-19H-5-W 67	173.68	191.47	191.2	5.938	5.938	5.94112	0.59	1.78	0	0.64	0.59		2.42	Hodell et al., 2001	C.mundulus
162-982B-19H-5-W 67	173.68	191.47	191.2	5.938	5.938	5.94112	0.8	1.81	0	0.64	0.8	0.8	2.45	Hodell et al., 2001	C.wuellerstorfi
162-982B-19H-5-W 77	173.78	191.57	191.3	5.94028	5.94042	5.94325	0.61	2.04	0	0.64	0.61		2.68	Hodell et al., 2001	C.mundulus
162-982B-19H-5-W 77	173.78	191.57	191.3	5.94028	5.94042	5.94325	0.73	1.95	0	0.64	0.73	0.73	2.59	Hodell et al., 2001	C.wuellerstorfi
162-982B-19H-5-W 87	173.88	191.67	191.4	5.94256	5.94284	5.94537	0.59	2.14	0	0.64	0.59		2.78	Hodell et al., 2001	C.mundulus
162-982B-19H-5-W 87	173.88	191.67	191.4	5.94256	5.94284	5.94537	0.67	2.24	0	0.64	0.67	0.67	2.88	Hodell et al., 2001	C.wuellerstorfi
162-982B-19H-5-W 97	173.98	191.77	191.5	5.94485	5.94526	5.94749	0.7	2.21	0	0.64	0.7	0.7	2.85	Hodell et al., 2001	C.wuellerstorfi
162-982B-19H-5-W 97	173.98	191.77	191.5	5.94485	5.94526	5.94749	0.5	2.14	0	0.64	0.5		2.78	Hodell et al., 2001	C.mundulus
162-982B-19H-5-W 107	174.08	191.87	191.6	5.94713	5.94767	5.94961	0.41	2.14	0	0.64	0.41		2.78	Hodell et al., 2001	C.mundulus
162-982B-19H-5-W 107	174.08	191.87	191.6	5.94713	5.94767	5.94961	0.69	2.25	0	0.64	0.69	0.69	2.89	Hodell et al., 2001	C.wuellerstorfi
162-982B-19H-5-W 117	174.18	191.97	191.7	5.94941	5.95009	5.95174	0.55	2.21	0	0.64	0.55		2.85	Hodell et al., 2001	C.mundulus
162-982B-19H-5-W 117	174.18	191.97	191.7	5.94941	5.95009	5.95174	0.69	2.23	0	0.64	0.69	0.69	2.87	Hodell et al., 2001	C.wuellerstorfi
162-982B-19H-5-W 127	174.28	192.07	191.8	5.95169	5.95251	5.95386	0.53	2.24	0	0.64	0.53		2.88	Hodell et al., 2001	C.mundulus
162-982B-19H-5-W 127	174.28	192.07	191.8	5.95169	5.95251	5.95386	0.76	2.34	0	0.64	0.76	0.76	2.98	Hodell et al., 2001	C.wuellerstorfi
162-982B-19H-5-W 137	174.38	192.17	191.9	5.95397	5.95493	5.95598	0.77	2.34	0	0.64	0.77	0.77	2.98	Hodell et al., 2001	C.wuellerstorfi
162-982B-19H-5-W 137	174.38	192.17	191.9	5.95397	5.95493	5.95598	0.54	2.23	0	0.64	0.54		2.87	Hodell et al., 2001	C.mundulus
162-982B-19H-5-W 147	174.48	192.27	192	5.95625	5.95735	5.9581	0.71	2.33	0	0.64	0.71		2.97	Hodell et al., 2001	C.mundulus
162-982B-19H-5-W 147	174.48	192.27	192	5.95625	5.95735	5.9581	0.88	2.38	0	0.64	0.88	0.88	3.02	Hodell et al., 2001	C.wuellerstorfi
162-982B-19H-6-W 7	174.58	192.37	192.1	5.95854	5.95977	5.96023	0.77	2.21	0	0.64	0.77		2.85	Hodell et al., 2001	C.mundulus
162-982B-19H-6-W 7	174.58	192.37	192.1	5.95854	5.95977	5.96023	0.89	2.26	0	0.64	0.89	0.89	2.9	Hodell et al., 2001	C.wuellerstorfi
162-982B-19H-6-W 17	174.68	192.47	192.2	5.96082	5.96219	5.96235	0.8	2.47	0	0.64	0.8		3.11	Hodell et al., 2001	C.mundulus
162-982B-19H-6-W 17	174.68	192.47	192.2	5.96082	5.96219	5.96235	0.94	2.37	0	0.64	0.94	0.94	3.01	Hodell et al., 2001	C.wuellerstorfi
162-982B-19H-6-W 27	174.78	192.57	192.3	5.9631	5.9646	5.96447	0.96	2.35	0	0.64	0.96	0.96	2.99	Hodell et al., 2001	C.wuellerstorfi
162-982B-19H-6-W 27	174.78	192.57	192.3	5.9631	5.9646	5.96447	0.75	2.18	0	0.64	0.75		2.82	Hodell et al., 2001	C.mundulus
162-982B-19H-6-W 37	174.88	192.67	192.4	5.96538	5.96702	5.96659	0.94	2.33	0	0.64	0.94	0.94	2.97	Hodell et al., 2001	C.wuellerstorfi
162-982B-19H-6-W 37	174.88	192.67	192.4	5.96538	5.96702	5.96659	0.76	2.27	0	0.64	0.76		2.91	Hodell et al., 2001	C.mundulus
162-982B-19H-6-W 47	174.98	192.77	192.5	5.96766	5.96944	5.96872	0.86	2.21	0	0.64	0.86		2.85	Hodell et al., 2001	C.mundulus
162-982B-19H-6-W 47	174.98	192.77	192.5	5.96766	5.96944	5.96872	0.87	1.94	0	0.64	0.87	0.87	2.58	Hodell et al., 2001	C.wuellerstorfi
162-982B-19H-6-W 57	175.08	192.87	192.6	5.96995	5.97186	5.97084	0.82	2.26	0	0.64	0.82		2.9	Hodell et al., 2001	C.mundulus
162-982B-19H-6-W 57	175.08	192.87	192.6	5.96995	5.97186	5.97084	1.09	2.24	0	0.64	1.09	1.09	2.88	Hodell et al., 2001	C.wuellerstorfi
162-982B-19H-6-W 67	175.18	192.97	192.7	5.97223	5.97428	5.97296	1.1	2.14	0	0.64	1.1	1.1	2.78	Hodell et al., 2001	C.wuellerstorfi
162-982B-19H-6-W 67	175.18	192.97	192.7	5.97223	5.97428	5.97296	0.91	2.19	0	0.64	0.91		2.83	Hodell et al., 2001	C.mundulus
162-982B-19H-6-W 77	175.28	193.07	192.8	5.97451	5.9767	5.97509	1.03	2.16	0	0.64	1.03	1.03	2.8	Hodell et al., 2001	C.wuellerstorfi
162-982B-19H-6-W 77	175.28	193.07	192.8	5.97451	5.9767	5.97509	0.95	2.22	0	0.64	0.95		2.86	Hodell et al., 2001	C.mundulus
162-982B-19H-6-W 87	175.38	193.17	192.9	5.97679	5.97912	5.97721	0.96	2.17	0	0.64	0.96		2.81	Hodell et al., 2001	C.mundulus
162-982B-19H-6-W 87	175.38	193.17	192.9	5.97679	5.97912	5.97721	0.98	2.17	0	0.64	0.98	0.98	2.81	Hodell et al., 2001	C.wuellerstorfi
162-982B-19H-6-W 97	175.48	193.27	193	5.97907	5.98153	5.97933	1	2.18	0	0.64	1		2.82	Hodell et al., 2001	C.mundulus
162-982B-19H-6-W 97	175.48	193.27	193	5.97907	5.98153	5.97933	1	2.14	0	0.64	1	1	2.78	Hodell et al., 2001	C.wuellerstorfi
162-982B-19H-6-W 107	175.58	193.37	193.1	5.98136	5.98395	5.98145	1.02	2.19	0	0.64	1.02		2.83	Hodell et al., 2001	C.mundulus
162-982C-20H-1-W 37	175.18	193.59	193.15	5.9825	5.98516	5.98573	0.95	2.1	0	0.64	0.95	0.95	2.74	Hodell et al., 2001	C.wuellerstorfi
162-982C-20H-1-W 37	175.18	193.59	193.15	5.9825	5.98516	5.98573	0.91	2.13	0	0.64	0.91		2.77	Hodell et al., 2001	C.mundulus
162-982B-19H-6-W 117	175.68	193.47	193.2	5.98364	5.98637	5.98358	0.99	2.12	0	0.64	0.99	0.99	2.76	Hodell et al., 2001	C.wuellerstorfi
162-982B-19H-6-W 117	175.68	193.47	193.2	5.98364	5.98637	5.98358	0.8	1.94	0	0.64	0.8		2.58	Hodell et al., 2001	C.mundulus
162-982C-20H-1-W 47	175.28	193.69	193.25	5.98478	5.98758	5.98745	1.02	2.17	0	0.64	1.02	1.02	2.81	Hodell et al., 2001	C.wuellerstorfi
162-982C-20H-1-W 47	175.28	193.69	193.25	5.98478	5.98758	5.98745	0.89	2.16	0	0.64	0.89		2.8	Hodell et al., 2001	C.mundulus
162-982C-20H-1-W 57	175.38	193.79	193.35	5.98706	5.99	5.98918	0.62	2.06	0	0.64	0.62	0.62	2.7	Hodell et al., 2001	C.wuellerstorfi
162-982C-20H-1-W 57	175.38	193.79	193.35	5.98706	5.99	5.98918	0.64	2.08	0	0.64	0.64		2.72	Hodell et al., 2001	C.mundulus
162-982C-20H-1-W 67	175.48	193.89	193.45	5.98934	5.9916	5.99091	0.71	2.31	0	0.64	0.71	0.71	2.95	Hodell et al., 2001	C.wuellerstorfi
162-982C-20H-1-W 67	175.48	193.89	193.45	5.98934	5.9916	5.99091	0.69	2.09	0	0.64	0.69		2.73	Hodell et al., 2001	C.mundulus
162-982C-20H-1-W 77	175.58	193.99	193.55	5.99162	5.9932	5.99264	0.67	2.06	0	0.64	0.67		2.7	Hodell et al., 2001	C.mundulus
162-982C-20H-1-W 77	175.58	193.99	193.55	5.99162	5.9932	5.99264	0.76	2.14	0	0.64	0.76	0.76	2.78	Hodell et al., 2001	C.wuellerstorfi
162-982C-20H-1-W 87	175.68	194.09	193.65	5.99391	5.9948	5.99436	0.56	2.29	0	0.64	0.56	0.56	2.93	Hodell et al., 2001	C.wuellerstorfi
162-982C-20H-1-W 97	175.78	194.19	193.75	5.99619	5.9964	5.99609	0.66	2.11	0	0.64	0.66	0.66	2.75	Hodell et al., 2001	C.wuellerstorfi
162-982C-20H-1-W 97	175.78	194.19	193.75	5.99619	5.9964	5.99609	0.58	2.19	0	0.64	0.58		2.83	Hodell et al., 2001	C.mundulus
162-982C-20H-1-W 107	175.88	194.29	193.85	5.99847	5.998	5.99782	0.71	2.35	0	0.64	0.71	0.71	2.99	Hodell et al., 2001	C.wuellerstorfi
162-982C-20H-1-W 107	175.88	194.29	193.85	5.99847	5.998	5.99782	0.42	2.53	0	0.64	0.42		3.17	Hodell et al., 2001	C.mundulus
162-982C-20H-1-W 117	175.98	194.39	193.95	6.00075	5.9996	5.99955	0.65	2.45	0	0.64	0.65	0.65	3.09	Hodell et al., 2001	C.wuellerstorfi
162-982C-20H-1-W 117	175.98	194.39	193.95	6.00075	5.9996	5.99955	0.11	2.44	0	0.64	0.11		3.08	Hodell et al., 2001	C.mundulus
162-982C-20H-1-W 127	176.08	194.49	194.05	6.00303	6.0012	6.00127	-0.27	2.55	0	0.64	-0.27		3.19	Hodell et al., 2001	C.mundulus
162-982C-20H-1-W 127	176.08	194.49	194.05	6.00303	6.0012	6.00127	0.65	2.5	0	0.64	0.65	0.65	3.14	Hodell et al., 2001	C.wuellerstorfi
162-982C-20H-1-W 137	176.18	194.59	194.15	6.00532	6.0028	6.003	0.46	2.45	0	0.64	0.46	0.46	3.09	Hodell et al., 2001	C.wuellerstorfi
162-982C-20H-1-W 137	176.18	194.59	194.15	6.00532	6.0028	6.003	0.35	2.39	0	0.64	0.35		3.03	Hodell et al., 2001	C.mundulus
162-982C-20H-1-W 147	176.28	194.69	194.25	6.0076	6.0044	6.00532	0.72	2.36	0	0.64	0.72	0.72	3	Hodell et al., 2001	C.wuellerstorfi
162-982C-20H-1-W 147	176.28	194.69	194.25	6.0076	6.0044	6.00532	0.66	2.3	0	0.64	0.66		2.94	Hodell et al., 2001	C.mundulus
162-982C-20H-2-W 7	176.38	194.79	194.35	6.00988	6.006	6.00764	0.57	2.32	0	0.64	0.57		2.96	Hodell et al., 2001	C.mundulus
162-982C-20H-2-W 7	176.38	194.79	194.35	6.00988	6.006	6.00764	0.78	2.3	0	0.64	0.78	0.78	2.94	Hodell et al., 2001	C.wuellerstorfi
162-982C-20H-2-W 17	176.48	194.89	194.45	6.01216	6.0076	6.00996	0.8	2.19	0	0.64	0.8		2.83	Hodell et al., 2001	C.mundulus
162-982C-20H-2-W 17	176.48	194.89	194.45	6.01216	6.0076	6.00996	0.67	2.27	0	0.64	0.67	0.67	2.91	Hodell et al., 2001	C.wuellerstorfi
162-982C-20H-2-W 27	176.58	194.99	194.55	6.01444	6.0092	6.01229	0.99	2.18	0	0.64	0.99	0.99	2.82	Hodell et al., 2001	C.wuellerstorfi
162-982C-20H-2-W 27	176.58	194.99	194.55	6.01444	6.0092	6.01229	0.79	2.13	0	0.64	0.79		2.77	Hodell et al., 2001	C.mundulus
162-982C-20H-2-W 37	176.68	195.09	194.65	6.01672	6.0108	6.01461	0.87	2.16	0	0.64	0.87	0.87	2.8	Hodell et al., 2001	C.wuellerstorfi
162-982C-20H-2-W 47	176.78	195.19	194.75	6.01901	6.0124	6.01693	0.56	2.19	0	0.64	0.56		2.83	Hodell et al., 2001	C.mundulus
162-982C-20H-2-W 47	176.78	195.19	194.75	6.01901	6.0124	6.01693	0.59	2.14	0	0.64	0.59	0.59	2.78	Hodell et al., 2001	C.wuellerstorfi
162-982C-20H-2-W 57	176.88	195.29	194.85	6.02129	6.014	6.01925	0.77	2	0	0.64	0.77	0.77	2.64	Hodell et al., 2001	C.wuellerstorfi
162-982C-20H-2-W 57	176.88	195.29	194.85	6.02129	6.014	6.01925	0.84	2.06	0	0.64	0.84		2.7	Hodell et al., 2001	C.mundulus
162-982C-20H-2-W 67	176.98	195.39	194.95	6.02357	6.017	6.02157	0.65	2.07	0	0.64	0.65	0.65	2.71	Hodell et al., 2001	C.wuellerstorfi
162-982C-20H-2-W 67	176.98	195.39	194.95	6.02357	6.017	6.02157	0.87	2.35	0	0.64	0.87		2.99	Hodell et al., 2001	C.mundulus
162-982C-20H-2-W 77	177.08	195.49	195.05	6.02585	6.02	6.02389	0.88	2.4	0	0.64	0.88	0.88	3.04	Hodell et al., 2001	C.wuellerstorfi
162-982C-20H-2-W 77	177.08	195.49	195.05	6.02585	6.02	6.02389	0.85	2.3	0	0.64	0.85		2.94	Hodell et al., 2001	C.mundulus
162-982C-20H-2-W 87	177.18	195.59	195.15	6.02813	6.023	6.02621	0.86	2.22	0	0.64	0.86		2.86	Hodell et al., 2001	C.mundulus
162-982C-20H-2-W 87	177.18	195.59	195.15	6.02813	6.023	6.02621	1.06	2.31	0	0.64	1.06	1.06	2.95	Hodell et al., 2001	C.wuellerstorfi
162-982C-20H-2-W 97	177.28	195.69	195.25	6.03042	6.026	6.02854	0.86	2.17	0	0.64	0.86		2.81	Hodell et al., 2001	C.mundulus
162-982C-20H-2-W 97	177.28	195.69	195.25	6.03042	6.026	6.02854	1.06	2.36	0	0.64	1.06	1.06	3	Hodell et al., 2001	C.wuellerstorfi
162-982C-20H-2-W 107	177.38	195.79	195.35	6.0327	6.029	6.03086	0.85	2.13	0	0.64	0.85		2.77	Hodell et al., 2001	C.mundulus
162-982C-20H-2-W 117	177.48	195.89	195.45	6.03498	6.032	6.03318	0.76	2.32	0	0.64	0.76		2.96	Hodell et al., 2001	C.mundulus
162-982C-20H-2-W 117	177.48	195.89	195.45	6.03498	6.032	6.03318	0.89	2.34	0	0.64	0.89	0.89	2.98	Hodell et al., 2001	C.wuellerstorfi
162-982C-20H-2-W 127	177.58	195.99	195.55	6.03726	6.035	6.0355	0.78	2.22	0	0.64	0.78		2.86	Hodell et al., 2001	C.mundulus
162-982C-20H-2-W 127	177.58	195.99	195.55	6.03726	6.035	6.0355	1.03	2.33	0	0.64	1.03	1.03	2.97	Hodell et al., 2001	C.wuellerstorfi
162-982C-20H-2-W 137	177.68	196.09	195.65	6.03954	6.038	6.03782	0.77	2.38	0	0.64	0.77		3.02	Hodell et al., 2001	C.mundulus
162-982C-20H-2-W 137	177.68	196.09	195.65	6.03954	6.038	6.03782	0.84	2.34	0	0.64	0.84	0.84	2.98	Hodell et al., 2001	C.wuellerstorfi
162-982C-20H-2-W 147	177.78	196.19	195.75	6.04183	6.041	6.04014	0.81	2.34	0	0.64	0.81		2.98	Hodell et al., 2001	C.mundulus
162-982C-20H-2-W 147	177.78	196.19	195.75	6.04183	6.041	6.04014	0.97	2.49	0	0.64	0.97	0.97	3.13	Hodell et al., 2001	C.wuellerstorfi
162-982C-20H-3-W 7	177.88	196.29	195.85	6.04411	6.044	6.0425	0.63	2.29	0	0.64	0.63		2.93	Hodell et al., 2001	C.mundulus
162-982C-20H-3-W 7	177.88	196.29	195.85	6.04411	6.044	6.0425	0.96	2.43	0	0.64	0.96	0.96	3.07	Hodell et al., 2001	C.wuellerstorfi
162-982C-20H-3-W 17	177.98	196.39	195.95	6.04639	6.047	6.045	1.05	2.33	0	0.64	1.05	1.05	2.97	Hodell et al., 2001	C.wuellerstorfi
162-982C-20H-3-W 17	177.98	196.39	195.95	6.04639	6.047	6.045	0.93	2.3	0	0.64	0.93		2.94	Hodell et al., 2001	C.mundulus
162-982C-20H-3-W 27	178.08	196.49	196.05	6.04867	6.05	6.0475	0.27	2.33	0	0.64	0.27		2.97	Hodell et al., 2001	C.mundulus
162-982C-20H-3-W 27	178.08	196.49	196.05	6.04867	6.05	6.0475	1.15	2.28	0	0.64	1.15	1.15	2.92	Hodell et al., 2001	C.wuellerstorfi
162-982C-20H-3-W 37	178.18	196.59	196.15	6.05095	6.053	6.05	1.25	2.19	0	0.64	1.25	1.25	2.83	Hodell et al., 2001	C.wuellerstorfi
162-982C-20H-3-W 37	178.18	196.59	196.15	6.05095	6.053	6.05	1	2.09	0	0.64	1		2.73	Hodell et al., 2001	C.mundulus
162-982C-20H-3-W 47	178.28	196.69	196.25	6.05324	6.0552	6.0525	0.78	2.18	0	0.64	0.78		2.82	Hodell et al., 2001	C.mundulus
162-982C-20H-3-W 47	178.28	196.69	196.25	6.05324	6.0552	6.0525	1.2	2.21	0	0.64	1.2	1.2	2.85	Hodell et al., 2001	C.wuellerstorfi
162-982C-20H-3-W 57	178.38	196.79	196.35	6.05552	6.0574	6.055	1.16	2.22	0	0.64	1.16	1.16	2.86	Hodell et al., 2001	C.wuellerstorfi
162-982C-20H-3-W 57	178.38	196.79	196.35	6.05552	6.0574	6.055	1.18	2.25	0	0.64	1.18		2.89	Hodell et al., 2001	C.mundulus
162-982C-20H-3-W 67	178.48	196.89	196.45	6.0578	6.0596	6.0575	1.14	2.23	0	0.64	1.14	1.14	2.87	Hodell et al., 2001	C.wuellerstorfi
162-982C-20H-3-W 67	178.48	196.89	196.45	6.0578	6.0596	6.0575	1.17	2.28	0	0.64	1.17		2.92	Hodell et al., 2001	C.mundulus
162-982C-20H-3-W 77	178.58	196.99	196.55	6.06008	6.0618	6.06	1.04	2.18	0	0.64	1.04		2.82	Hodell et al., 2001	C.mundulus
162-982C-20H-3-W 77	178.58	196.99	196.55	6.06008	6.0618	6.06	1.17	2.17	0	0.64	1.17	1.17	2.81	Hodell et al., 2001	C.wuellerstorfi
162-982C-20H-3-W 87	178.68	197.09	196.65	6.06236	6.064	6.0625	1.06	2.36	0	0.64	1.06		3	Hodell et al., 2001	C.mundulus
162-982C-20H-3-W 87	178.68	197.09	196.65	6.06236	6.064	6.0625	1.04	2.13	0	0.64	1.04	1.04	2.77	Hodell et al., 2001	C.wuellerstorfi
162-982C-20H-3-W 97	178.78	197.19	196.75	6.06464	6.0662	6.065	0.84	2.16	0	0.64	0.84		2.8	Hodell et al., 2001	C.mundulus
162-982C-20H-3-W 97	178.78	197.19	196.75	6.06464	6.0662	6.065	1.01	2.18	0	0.64	1.01	1.01	2.82	Hodell et al., 2001	C.wuellerstorfi
162-982C-20H-3-W 107	178.88	197.29	196.85	6.06693	6.0684	6.0675	0.93	2.29	0	0.64	0.93	0.93	2.93	Hodell et al., 2001	C.wuellerstorfi
162-982C-20H-3-W 107	178.88	197.29	196.85	6.06693	6.0684	6.0675	0.92	2.3	0	0.64	0.92		2.94	Hodell et al., 2001	C.mundulus
162-982C-20H-3-W 117	178.98	197.39	196.95	6.06921	6.0706	6.07	0.82	2.22	0	0.64	0.82	0.82	2.86	Hodell et al., 2001	C.wuellerstorfi
162-982C-20H-3-W 117	178.98	197.39	196.95	6.06921	6.0706	6.07	0.43	2.27	0	0.64	0.43		2.91	Hodell et al., 2001	C.mundulus
162-982C-20H-3-W 127	179.08	197.49	197.05	6.07149	6.0728	6.0725	0.71	2.36	0	0.64	0.71		3	Hodell et al., 2001	C.mundulus
162-982C-20H-3-W 127	179.08	197.49	197.05	6.07149	6.0728	6.0725	0.62	2.25	0	0.64	0.62	0.62	2.89	Hodell et al., 2001	C.wuellerstorfi
162-982B-20H-2-W 69	178.69	197.35	197.06	6.07172	6.07302	6.069	0.86	2.55	0	0.64	0.86	0.86	3.19	New data (this study)	C.wuellerstorfi
162-982C-20H-3-W 137	179.18	197.59	197.15	6.07377	6.075	6.075	0.86	2.45	0	0.64	0.86	0.86	3.09	Hodell et al., 2001	C.wuellerstorfi
162-982C-20H-3-W 137	179.18	197.59	197.15	6.07377	6.075	6.075	0.72	2.29	0	0.64	0.72		2.93	Hodell et al., 2001	C.mundulus
162-982B-20H-2-W 79	178.79	197.45	197.16	6.074	6.07522	6.0715	0.88	2.62	0	0.64	0.88	0.88	3.26	New data (this study)	C.wuellerstorfi
162-982C-20H-3-W 147	179.28	197.69	197.25	6.07605	6.0772	6.0775	0.59	2.22	0	0.64	0.59		2.86	Hodell et al., 2001	C.mundulus
162-982C-20H-3-W 147	179.28	197.69	197.25	6.07605	6.0772	6.0775	0.74	2.35	0	0.64	0.74	0.74	2.99	Hodell et al., 2001	C.wuellerstorfi
162-982B-20H-2-W 89	178.89	197.55	197.26	6.07628	6.07742	6.074	0.19	2.61	0	0.64	0.19		3.25	New data (this study)	C.mundulus
162-982C-20H-4-W 7	179.38	197.79	197.35	6.07834	6.0794	6.07995	0.44	2.55	0	0.64	0.44		3.19	Hodell et al., 2001	C.mundulus
162-982B-20H-2-W 99	178.99	197.65	197.36	6.07856	6.07962	6.0765	0.97	2.49	0	0.64	0.97	0.97	3.13	New data (this study)	C.wuellerstorfi
162-982B-20H-2-W 109	179.09	197.75	197.46	6.08085	6.08182	6.079	1.08	2.42	0	0.64	1.08	1.08	3.06	New data (this study)	C.wuellerstorfi
162-982B-20H-2-W 117	179.18	197.84	197.55	6.0829	6.0838	6.08115	0.76	2.24	0	0.64	0.76		2.88	Hodell et al., 2001	C.mundulus
162-982B-20H-2-W 117	179.18	197.84	197.55	6.0829	6.0838	6.08115	0.87	2.21	0	0.64	0.87	0.87	2.85	Hodell et al., 2001	C.wuellerstorfi
162-982B-20H-2-W 127	179.28	197.94	197.65	6.08518	6.086	6.08353	0.91	2.36	0	0.64	0.91		3	Hodell et al., 2001	C.mundulus
162-982B-20H-2-W 127	179.28	197.94	197.65	6.08518	6.086	6.08353	1.11	2.21	0	0.64	1.11	1.11	2.85	Hodell et al., 2001	C.wuellerstorfi
162-982B-20H-2-W 137	179.38	198.04	197.75	6.08746	6.0882	6.08592	0.87	2.02	0	0.64	0.87		2.66	Hodell et al., 2001	C.mundulus
162-982B-20H-2-W 137	179.38	198.04	197.75	6.08746	6.0882	6.08592	1.12	2.12	0	0.64	1.12	1.12	2.76	Hodell et al., 2001	C.wuellerstorfi
162-982B-20H-2-W 147	179.48	198.14	197.85	6.08975	6.0904	6.08831	0.86	2.12	0	0.64	0.86		2.76	Hodell et al., 2001	C.mundulus
162-982B-20H-2-W 147	179.48	198.14	197.85	6.08975	6.0904	6.08831	1.19	2.14	0	0.64	1.19	1.19	2.78	Hodell et al., 2001	C.wuellerstorfi
162-982B-20H-3-W 7	179.58	198.24	197.95	6.09203	6.0926	6.09069	1.02	2	0	0.64	1.02	1.02	2.64	Hodell et al., 2001	C.wuellerstorfi
162-982B-20H-3-W 7	179.58	198.24	197.95	6.09203	6.0926	6.09069	0.91	1.95	0	0.64	0.91		2.59	Hodell et al., 2001	C.mundulus
162-982B-20H-3-W 17	179.68	198.34	198.05	6.09431	6.0948	6.09308	1	2.1	0	0.64	1		2.74	Hodell et al., 2001	C.mundulus
162-982B-20H-3-W 17	179.68	198.34	198.05	6.09431	6.0948	6.09308	1.12	2.04	0	0.64	1.12	1.12	2.68	Hodell et al., 2001	C.wuellerstorfi
162-982B-20H-3-W 27	179.78	198.44	198.15	6.09659	6.097	6.09547	0.89	2.1	0	0.64	0.89		2.74	Hodell et al., 2001	C.mundulus
162-982B-20H-3-W 27	179.78	198.44	198.15	6.09659	6.097	6.09547	0.91	2.21	0	0.64	0.91	0.91	2.85	Hodell et al., 2001	C.wuellerstorfi
162-982B-20H-3-W 37	179.88	198.54	198.25	6.09887	6.0992	6.09785	0.8	2.11	0	0.64	0.8		2.75	Hodell et al., 2001	C.mundulus
162-982B-20H-3-W 37	179.88	198.54	198.25	6.09887	6.0992	6.09785	1.03	2.02	0	0.64	1.03	1.03	2.66	Hodell et al., 2001	C.wuellerstorfi
162-982B-20H-3-W 57	180.08	198.74	198.45	6.10344	6.1036	6.10262	0.76	2.26	0	0.64	0.76		2.9	Hodell et al., 2001	C.mundulus
162-982B-20H-3-W 57	180.08	198.74	198.45	6.10344	6.1036	6.10262	0.76	2.06	0	0.64	0.76	0.76	2.7	Hodell et al., 2001	C.wuellerstorfi
162-982B-20H-3-W 67	180.18	198.84	198.55	6.10572	6.1058	6.10501	0.88	2.29	0	0.64	0.88	0.88	2.93	Hodell et al., 2001	C.wuellerstorfi
162-982B-20H-3-W 67	180.18	198.84	198.55	6.10572	6.1058	6.10501	0.62	2.11	0	0.64	0.62		2.75	Hodell et al., 2001	C.mundulus
162-982B-20H-3-W 77	180.28	198.94	198.65	6.108	6.108	6.1074	0.8	2.16	0	0.64	0.8	0.8	2.8	Hodell et al., 2001	C.wuellerstorfi
162-982B-20H-3-W 77	180.28	198.94	198.65	6.108	6.108	6.1074	0.57	1.96	0	0.64	0.57		2.6	Hodell et al., 2001	C.mundulus
162-982B-20H-3-W 87	180.38	199.04	198.75	6.10981	6.10966	6.10978	0.78	2.27	0	0.64	0.78	0.78	2.91	Hodell et al., 2001	C.wuellerstorfi
162-982B-20H-3-W 87	180.38	199.04	198.75	6.10981	6.10966	6.10978	0.4	2.25	0	0.64	0.4		2.89	Hodell et al., 2001	C.mundulus
162-982B-20H-3-W 97	180.48	199.14	198.85	6.11161	6.11133	6.11217	0.53	2.32	0	0.64	0.53		2.96	Hodell et al., 2001	C.mundulus
162-982B-20H-3-W 97	180.48	199.14	198.85	6.11161	6.11133	6.11217	0.65	2.43	0	0.64	0.65	0.65	3.07	Hodell et al., 2001	C.wuellerstorfi
162-982B-20H-3-W 107	180.58	199.24	198.95	6.11342	6.11299	6.11456	0.75	2.39	0	0.64	0.75	0.75	3.03	Hodell et al., 2001	C.wuellerstorfi
162-982B-20H-3-W 107	180.58	199.24	198.95	6.11342	6.11299	6.11456	0.44	2.36	0	0.64	0.44		3	Hodell et al., 2001	C.mundulus
162-982B-20H-3-W 117	180.68	199.34	199.05	6.11522	6.11466	6.11694	0.5	2.46	0	0.64	0.5	0.5	3.1	Hodell et al., 2001	C.wuellerstorfi
162-982B-20H-3-W 117	180.68	199.34	199.05	6.11522	6.11466	6.11694	0.47	2.47	0	0.64	0.47		3.11	Hodell et al., 2001	C.mundulus
162-982B-20H-3-W 137	180.88	199.54	199.25	6.11883	6.11798	6.12152	0.38	2.38	0	0.64	0.38	0.38	3.02	Hodell et al., 2001	C.wuellerstorfi
162-982B-20H-3-W 137	180.88	199.54	199.25	6.11883	6.11798	6.12152	0.39	2.37	0	0.64	0.39		3.01	Hodell et al., 2001	C.mundulus
162-982B-20H-3-W 147	180.98	199.64	199.35	6.12064	6.11965	6.12325	0.39	2.26	0	0.64	0.39		2.9	Hodell et al., 2001	C.mundulus
162-982B-20H-3-W 147	180.98	199.64	199.35	6.12064	6.11965	6.12325	0.67	2.47	0	0.64	0.67	0.67	3.11	Hodell et al., 2001	C.wuellerstorfi
162-982B-20H-4-W 7	181.08	199.74	199.45	6.12244	6.12131	6.12498	0.69	2.55	0	0.64	0.69	0.69	3.19	Hodell et al., 2001	C.wuellerstorfi
162-982B-20H-4-W 7	181.08	199.74	199.45	6.12244	6.12131	6.12498	0.44	2.14	0	0.64	0.44		2.78	Hodell et al., 2001	C.mundulus
162-982B-20H-4-W 17	181.18	199.84	199.55	6.12425	6.12297	6.12671	0.81	2.01	0	0.64	0.81	0.81	2.65	Hodell et al., 2001	C.wuellerstorfi
162-982B-20H-4-W 17	181.18	199.84	199.55	6.12425	6.12297	6.12671	0.66	2.32	0	0.64	0.66		2.96	Hodell et al., 2001	C.mundulus
162-982B-20H-4-W 27	181.28	199.94	199.65	6.12605	6.12464	6.12844	1.11	2.31	0	0.64	1.11	1.11	2.95	Hodell et al., 2001	C.wuellerstorfi
162-982B-20H-4-W 27	181.28	199.94	199.65	6.12605	6.12464	6.12844	0.93	2.25	0	0.64	0.93		2.89	Hodell et al., 2001	C.mundulus
162-982B-20H-4-W 37	181.38	200.04	199.75	6.12786	6.1263	6.13017	0.88	1.96	0	0.64	0.88		2.6	Hodell et al., 2001	C.mundulus
162-982B-20H-4-W 37	181.38	200.04	199.75	6.12786	6.1263	6.13017	1	2.15	0	0.64	1	1	2.79	Hodell et al., 2001	C.wuellerstorfi
162-982B-20H-4-W 47	181.48	200.14	199.85	6.12966	6.12797	6.1319	0.88	1.76	0	0.64	0.88	0.88	2.4	Hodell et al., 2001	C.wuellerstorfi
162-982B-20H-4-W 47	181.48	200.14	199.85	6.12966	6.12797	6.1319	0.92	2.12	0	0.64	0.92		2.76	Hodell et al., 2001	C.mundulus
162-982B-20H-4-W 57	181.58	200.24	199.95	6.13147	6.12963	6.13363	0.97	2.07	0	0.64	0.97	0.97	2.71	Hodell et al., 2001	C.wuellerstorfi
162-982B-20H-4-W 57	181.58	200.24	199.95	6.13147	6.12963	6.13363	0.92	2.22	0	0.64	0.92		2.86	Hodell et al., 2001	C.mundulus
162-982B-20H-4-W 67	181.68	200.34	200.05	6.13327	6.13129	6.13537	0.95	1.88	0	0.64	0.95	0.95	2.52	Hodell et al., 2001	C.wuellerstorfi
162-982B-20H-4-W 67	181.68	200.34	200.05	6.13327	6.13129	6.13537	1.05	2.25	0	0.64	1.05		2.89	Hodell et al., 2001	C.mundulus
162-982B-20H-4-W 77	181.78	200.44	200.15	6.13508	6.13296	6.1371	0.99	2.27	0	0.64	0.99		2.91	Hodell et al., 2001	C.mundulus
162-982B-20H-4-W 87	181.88	200.54	200.25	6.13688	6.13462	6.13883	0.86	2	0	0.64	0.86		2.64	Hodell et al., 2001	C.mundulus
162-982B-20H-4-W 87	181.88	200.54	200.25	6.13688	6.13462	6.13883	1.11	1.96	0	0.64	1.11	1.11	2.6	Hodell et al., 2001	C.wuellerstorfi
162-982B-20H-4-W 97	181.98	200.64	200.35	6.13869	6.13628	6.14056	0.98	2.13	0	0.64	0.98	0.98	2.77	Hodell et al., 2001	C.wuellerstorfi
162-982B-20H-4-W 97	181.98	200.64	200.35	6.13869	6.13628	6.14056	0.9	2.1	0	0.64	0.9		2.74	Hodell et al., 2001	C.mundulus
162-982B-20H-4-W 107	182.08	200.74	200.45	6.1405	6.13795	6.14229	0.85	2.19	0	0.64	0.85		2.83	Hodell et al., 2001	C.mundulus
162-982B-20H-4-W 107	182.08	200.74	200.45	6.1405	6.13795	6.14229	1.02	2.08	0	0.64	1.02	1.02	2.72	Hodell et al., 2001	C.wuellerstorfi
162-982B-20H-4-W 117	182.18	200.84	200.55	6.1423	6.13961	6.14402	0.95	2.17	0	0.64	0.95	0.95	2.81	Hodell et al., 2001	C.wuellerstorfi
162-982B-20H-4-W 117	182.18	200.84	200.55	6.1423	6.13961	6.14402	1.04	2.14	0	0.64	1.04		2.78	Hodell et al., 2001	C.mundulus
162-982B-20H-4-W 127	182.28	200.94	200.65	6.14411	6.14128	6.14575	0.91	2.17	0	0.64	0.91		2.81	Hodell et al., 2001	C.mundulus
162-982B-20H-4-W 127	182.28	200.94	200.65	6.14411	6.14128	6.14575	0.91	2.15	0	0.64	0.91	0.91	2.79	Hodell et al., 2001	C.wuellerstorfi
162-982B-20H-4-W 137	182.38	201.04	200.75	6.14591	6.14294	6.14748	1.12	2.19	0	0.64	1.12	1.12	2.83	Hodell et al., 2001	C.wuellerstorfi
162-982B-20H-4-W 137	182.38	201.04	200.75	6.14591	6.14294	6.14748	1.02	2.22	0	0.64	1.02		2.86	Hodell et al., 2001	C.mundulus
162-982B-20H-4-W 147	182.48	201.14	200.85	6.14772	6.1446	6.14921	1.02	2.22	0	0.64	1.02	1.02	2.86	Hodell et al., 2001	C.wuellerstorfi
162-982B-20H-4-W 147	182.48	201.14	200.85	6.14772	6.1446	6.14921	0.9	2.22	0	0.64	0.9		2.86	Hodell et al., 2001	C.mundulus
162-982B-20H-5-W 7	182.58	201.24	200.95	6.14952	6.14627	6.15094	0.94	2.13	0	0.64	0.94	0.94	2.77	Hodell et al., 2001	C.wuellerstorfi
162-982B-20H-5-W 7	182.58	201.24	200.95	6.14952	6.14627	6.15094	0.83	2.15	0	0.64	0.83		2.79	Hodell et al., 2001	C.mundulus
162-982B-20H-5-W 17	182.68	201.34	201.05	6.15133	6.14793	6.15267	0.81	2.12	0	0.64	0.81		2.76	Hodell et al., 2001	C.mundulus
162-982B-20H-5-W 17	182.68	201.34	201.05	6.15133	6.14793	6.15267	1	2.21	0	0.64	1	1	2.85	Hodell et al., 2001	C.wuellerstorfi
162-982B-20H-5-W 27	182.78	201.44	201.15	6.15313	6.1496	6.1544	0.99	2.19	0	0.64	0.99	0.99	2.83	Hodell et al., 2001	C.wuellerstorfi
162-982B-20H-5-W 27	182.78	201.44	201.15	6.15313	6.1496	6.1544	0.73	2.2	0	0.64	0.73		2.84	Hodell et al., 2001	C.mundulus
162-982B-20H-5-W 37	182.88	201.54	201.25	6.15494	6.15126	6.15613	0.83	2.23	0	0.64	0.83	0.83	2.87	Hodell et al., 2001	C.wuellerstorfi
162-982B-20H-5-W 37	182.88	201.54	201.25	6.15494	6.15126	6.15613	0.6	2.24	0	0.64	0.6		2.88	Hodell et al., 2001	C.mundulus
162-982B-20H-5-W 47	182.98	201.64	201.35	6.15674	6.15292	6.15787	0.85	2.25	0	0.64	0.85	0.85	2.89	Hodell et al., 2001	C.wuellerstorfi
162-982B-20H-5-W 47	182.98	201.64	201.35	6.15674	6.15292	6.15787	0.71	2.18	0	0.64	0.71		2.82	Hodell et al., 2001	C.mundulus
162-982B-20H-5-W 57	183.08	201.74	201.45	6.15855	6.15459	6.1596	0.87	2.23	0	0.64	0.87	0.87	2.87	Hodell et al., 2001	C.wuellerstorfi
162-982B-20H-5-W 57	183.08	201.74	201.45	6.15855	6.15459	6.1596	0.64	2.08	0	0.64	0.64		2.72	Hodell et al., 2001	C.mundulus
162-982B-20H-5-W 67	183.18	201.84	201.55	6.16035	6.15625	6.16133	1.05	2.25	0	0.64	1.05	1.05	2.89	Hodell et al., 2001	C.wuellerstorfi
162-982B-20H-5-W 67	183.18	201.84	201.55	6.16035	6.15625	6.16133	0.88	2.23	0	0.64	0.88		2.87	Hodell et al., 2001	C.mundulus
162-982B-20H-5-W 77	183.28	201.94	201.65	6.16216	6.15791	6.16306	0.96	2.21	0	0.64	0.96	0.96	2.85	Hodell et al., 2001	C.wuellerstorfi
162-982B-20H-5-W 77	183.28	201.94	201.65	6.16216	6.15791	6.16306	1.03	2.21	0	0.64	1.03		2.85	Hodell et al., 2001	C.mundulus
162-982B-20H-5-W 87	183.38	202.04	201.75	6.16396	6.15958	6.16479	0.8	2.19	0	0.64	0.8	0.8	2.83	Hodell et al., 2001	C.wuellerstorfi
162-982B-20H-5-W 87	183.38	202.04	201.75	6.16396	6.15958	6.16479	0.92	2.15	0	0.64	0.92		2.79	Hodell et al., 2001	C.mundulus
162-982B-20H-5-W 97	183.48	202.14	201.85	6.16577	6.16124	6.16652	0.82	1.92	0	0.64	0.82	0.82	2.56	Hodell et al., 2001	C.wuellerstorfi
162-982B-20H-5-W 107	183.58	202.24	201.95	6.16757	6.16291	6.16825	0.82	1.83	0	0.64	0.82	0.82	2.47	Hodell et al., 2001	C.wuellerstorfi
162-982B-20H-5-W 107	183.58	202.24	201.95	6.16757	6.16291	6.16825	0.76	1.95	0	0.64	0.76		2.59	Hodell et al., 2001	C.mundulus
162-982B-20H-5-W 117	183.68	202.34	202.05	6.16938	6.16457	6.16998	0.84	2.05	0	0.64	0.84		2.69	Hodell et al., 2001	C.mundulus
162-982B-20H-5-W 117	183.68	202.34	202.05	6.16938	6.16457	6.16998	0.77	2.06	0	0.64	0.77	0.77	2.7	Hodell et al., 2001	C.wuellerstorfi
162-982B-20H-5-W 127	183.78	202.44	202.15	6.17119	6.16623	6.17171	0.99	2.12	0	0.64	0.99	0.99	2.76	Hodell et al., 2001	C.wuellerstorfi
162-982B-20H-5-W 127	183.78	202.44	202.15	6.17119	6.16623	6.17171	0.83	2.13	0	0.64	0.83		2.77	Hodell et al., 2001	C.mundulus
162-982B-20H-5-W 137	183.88	202.54	202.25	6.17299	6.1679	6.17344	0.91	2.22	0	0.64	0.91	0.91	2.86	Hodell et al., 2001	C.wuellerstorfi
162-982B-20H-5-W 137	183.88	202.54	202.25	6.17299	6.1679	6.17344	0.86	2.2	0	0.64	0.86		2.84	Hodell et al., 2001	C.mundulus
162-982B-20H-5-W 149	183.99	202.65	202.36	6.17498	6.16973	6.17369	0.92	2.3	0	0.64	0.92	0.92	2.94	New data (this study)	C.wuellerstorfi
162-982B-20H-6-W 9	184.09	202.75	202.46	6.17678	6.17139	6.17507	0.7	2.3	0	0.64	0.7		2.94	New data (this study)	C.mundulus
162-982B-20H-6-W 19	184.19	202.85	202.56	6.17859	6.17305	6.17646	0.51	2.35	0	0.64	0.51		2.99	New data (this study)	C.mundulus
162-982B-20H-6-W 29	184.29	202.95	202.66	6.18039	6.17472	6.17785	0.76	2.25	0	0.64	0.76	0.76	2.89	New data (this study)	C.wuellerstorfi
162-982B-20H-6-W 39	184.39	203.05	202.76	6.1822	6.17638	6.17923	0.81	2.31	0	0.64	0.81	0.81	2.95	New data (this study)	C.wuellerstorfi
162-982B-20H-6-W 49	184.49	203.15	202.86	6.184	6.17805	6.18062	1.09	2.32	0	0.64	1.09	1.09	2.96	New data (this study)	C.wuellerstorfi
162-982B-20H-6-W 59	184.59	203.25	202.96	6.18581	6.17971	6.18201	0.96	2.26	0	0.64	0.96	0.96	2.9	New data (this study)	C.wuellerstorfi
162-982B-20H-6-W 59	184.59	203.25	202.96	6.18581	6.17971	6.18201	1.08	2.32	0	0.64	1.08	1.08	2.96	New data (this study)	C.wuellerstorfi
162-982B-20H-6-W 59	184.59	203.25	202.96	6.18581	6.17971	6.18201	1.05	2.24	0	0.64	1.05		2.88	New data (this study)	C.mundulus
162-982B-20H-6-W 59	184.59	203.25	202.96	6.18581	6.17971	6.18201	0.46	2.34	0	0.64	0.46		2.98	New data (this study)	C.mundulus
162-982A-20H-2-W 59	181.29	201.63	202.99	6.18635	6.18021	6.15769	1.07	2.31	0	0.64	1.07	1.07	2.95	New data (this study)	C.wuellerstorfi
162-982B-20H-6-W 69	184.69	203.35	203.06	6.18761	6.18137	6.18339	0.99	2.27	0	0.64	0.99	0.99	2.91	New data (this study)	C.wuellerstorfi
162-982A-20H-2-W 69	181.39	201.73	203.09	6.18816	6.18187	6.15942	0.98	2.25	0	0.64	0.98	0.98	2.89	New data (this study)	C.wuellerstorfi
162-982A-20H-2-W 79	181.49	201.83	203.19	6.18996	6.18354	6.16115	0.87	2.14	0	0.64	0.87	0.87	2.78	New data (this study)	C.wuellerstorfi
162-982B-20H-6-W 89	184.89	203.55	203.26	6.19122	6.1847	6.18617	1.07	2.22	0	0.64	1.07	1.07	2.86	New data (this study)	C.wuellerstorfi
162-982A-20H-2-W 89	181.59	201.93	203.29	6.19177	6.1852	6.16288	0.81	2.06	0	0.64	0.81	0.81	2.7	New data (this study)	C.wuellerstorfi
162-982A-20H-2-W 99	181.69	202.03	203.39	6.19357	6.18686	6.16462	0.87	2.08	0	0.64	0.87	0.87	2.72	New data (this study)	C.wuellerstorfi
162-982A-20H-2-W 109	181.79	202.13	203.49	6.19538	6.18853	6.16635	0.95	2.25	0	0.64	0.95	0.95	2.89	New data (this study)	C.wuellerstorfi
162-982A-20H-2-W 119	181.89	202.23	203.59	6.19718	6.19019	6.16808	0.77	2.32	0	0.64	0.77	0.77	2.96	New data (this study)	C.wuellerstorfi
162-982A-20H-2-W 119	181.89	202.23	203.59	6.19718	6.19019	6.16808	0.82	2.38	0	0.64	0.82	0.82	3.02	New data (this study)	C.wuellerstorfi
162-982A-20H-2-W 119	181.89	202.23	203.59	6.19718	6.19019	6.16808	0.65	2.37	0	0.64	0.65		3.01	New data (this study)	C.mundulus
162-982A-20H-2-W 129	181.99	202.33	203.69	6.19899	6.19186	6.16981	0.65	2.24	0	0.64	0.65	0.65	2.88	New data (this study)	C.wuellerstorfi
162-982A-20H-2-W 139	182.09	202.43	203.79	6.20079	6.19352	6.17154	0.48	2.39	0	0.64	0.48	0.48	3.03	New data (this study)	C.wuellerstorfi
162-982A-20H-2-W 149	182.19	202.53	203.89	6.2026	6.19518	6.17327	0.59	2.37	0	0.64	0.59	0.59	3.01	New data (this study)	C.wuellerstorfi
162-982A-20H-3-W 7	182.28	202.62	203.98	6.20422	6.19668	6.17483	0.56	2.28	0	0.64	0.56	0.56	2.92	Hodell et al., 2001	C.wuellerstorfi
162-982A-20H-3-W 7	182.28	202.62	203.98	6.20422	6.19668	6.17483	0.41	2.25	0	0.64	0.41		2.89	Hodell et al., 2001	C.mundulus
162-982A-20H-3-W 17	182.38	202.72	204.08	6.20603	6.19834	6.17466	0.79	2.26	0	0.64	0.79	0.79	2.9	Hodell et al., 2001	C.wuellerstorfi
162-982A-20H-3-W 17	182.38	202.72	204.08	6.20603	6.19834	6.17466	0.6	2.12	0	0.64	0.6		2.76	Hodell et al., 2001	C.mundulus
162-982A-20H-3-W 27	182.48	202.82	204.18	6.20783	6.20001	6.17604	0.63	2.12	0	0.64	0.63		2.76	Hodell et al., 2001	C.mundulus
162-982A-20H-3-W 27	182.48	202.82	204.18	6.20783	6.20001	6.17604	0.93	2.23	0	0.64	0.93	0.93	2.87	Hodell et al., 2001	C.wuellerstorfi
162-982A-20H-3-W 37	182.58	202.92	204.28	6.20964	6.20167	6.17743	0.65	2.13	0	0.64	0.65		2.77	Hodell et al., 2001	C.mundulus
162-982A-20H-3-W 37	182.58	202.92	204.28	6.20964	6.20167	6.17743	0.81	2.1	0	0.64	0.81	0.81	2.74	Hodell et al., 2001	C.wuellerstorfi
162-982A-20H-3-W 47	182.68	203.02	204.38	6.21144	6.20334	6.17882	0.82	2.19	0	0.64	0.82	0.82	2.83	Hodell et al., 2001	C.wuellerstorfi
162-982A-20H-3-W 47	182.68	203.02	204.38	6.21144	6.20334	6.17882	0.47	2.15	0	0.64	0.47		2.79	Hodell et al., 2001	C.mundulus
162-982A-20H-3-W 57	182.78	203.12	204.48	6.21325	6.205	6.1802	0.77	2.02	0	0.64	0.77		2.66	Hodell et al., 2001	C.mundulus
162-982A-20H-3-W 57	182.78	203.12	204.48	6.21325	6.205	6.1802	0.67	1.95	0	0.64	0.67	0.67	2.59	Hodell et al., 2001	C.wuellerstorfi
162-982A-20H-3-W 67	182.88	203.22	204.58	6.21505	6.20744	6.18159	0.76	2.02	0	0.64	0.76		2.66	Hodell et al., 2001	C.mundulus
162-982A-20H-3-W 67	182.88	203.22	204.58	6.21505	6.20744	6.18159	0.83	2.07	0	0.64	0.83	0.83	2.71	Hodell et al., 2001	C.wuellerstorfi
162-982A-20H-3-W 77	182.98	203.32	204.68	6.21686	6.20988	6.18298	0.89	2.15	0	0.64	0.89		2.79	Hodell et al., 2001	C.mundulus
162-982A-20H-3-W 77	182.98	203.32	204.68	6.21686	6.20988	6.18298	0.89	1.91	0	0.64	0.89	0.89	2.55	Hodell et al., 2001	C.wuellerstorfi
162-982A-20H-3-W 87	183.08	203.42	204.78	6.21866	6.21232	6.18436	0.69	2.17	0	0.64	0.69		2.81	Hodell et al., 2001	C.mundulus
162-982A-20H-3-W 97	183.18	203.52	204.88	6.22047	6.21476	6.18575	0.82	2.27	0	0.64	0.82	0.82	2.91	Hodell et al., 2001	C.wuellerstorfi
162-982A-20H-3-W 97	183.18	203.52	204.88	6.22047	6.21476	6.18575	0.72	2.25	0	0.64	0.72		2.89	Hodell et al., 2001	C.mundulus
162-982A-20H-3-W 107	183.28	203.62	204.98	6.22227	6.2172	6.18714	0.82	2.18	0	0.64	0.82	0.82	2.82	Hodell et al., 2001	C.wuellerstorfi
162-982A-20H-3-W 107	183.28	203.62	204.98	6.22227	6.2172	6.18714	0.68	2.19	0	0.64	0.68		2.83	Hodell et al., 2001	C.mundulus
162-982A-20H-3-W 117	183.38	203.72	205.08	6.22408	6.21964	6.18852	0.85	2.09	0	0.64	0.85	0.85	2.73	Hodell et al., 2001	C.wuellerstorfi
162-982A-20H-3-W 117	183.38	203.72	205.08	6.22408	6.21964	6.18852	0.81	2.2	0	0.64	0.81		2.84	Hodell et al., 2001	C.mundulus
162-982A-20H-3-W 127	183.48	203.82	205.18	6.22589	6.22208	6.18991	0.73	2.01	0	0.64	0.73	0.73	2.65	Hodell et al., 2001	C.wuellerstorfi
162-982A-20H-3-W 127	183.48	203.82	205.18	6.22589	6.22208	6.18991	0.72	2.24	0	0.64	0.72		2.88	Hodell et al., 2001	C.mundulus
162-982A-20H-3-W 137	183.58	203.92	205.28	6.22769	6.22452	6.1913	0.75	2.07	0	0.64	0.75	0.75	2.71	Hodell et al., 2001	C.wuellerstorfi
162-982A-20H-3-W 137	183.58	203.92	205.28	6.22769	6.22452	6.1913	0.8	2.29	0	0.64	0.8		2.93	Hodell et al., 2001	C.mundulus
162-982A-20H-3-W 146	183.67	204.01	205.37	6.22932	6.22672	6.19254	0.63	2.12	0	0.64	0.63	0.63	2.76	Hodell et al., 2001	C.wuellerstorfi
162-982A-20H-4-W 7	183.78	204.12	205.48	6.2313	6.2294	6.19407	0.63	2.09	0	0.64	0.63	0.63	2.73	Hodell et al., 2001	C.wuellerstorfi
162-982A-20H-4-W 17	183.88	204.22	205.58	6.23311	6.23184	6.19545	0.37	2.19	0	0.64	0.37		2.83	Hodell et al., 2001	C.mundulus
162-982A-20H-4-W 17	183.88	204.22	205.58	6.23311	6.23184	6.19545	0.64	2.18	0	0.64	0.64	0.64	2.82	Hodell et al., 2001	C.wuellerstorfi
162-982A-20H-4-W 27	183.98	204.32	205.68	6.23491	6.23428	6.19684	0.6	2.21	0	0.64	0.6	0.6	2.85	Hodell et al., 2001	C.wuellerstorfi
162-982A-20H-4-W 27	183.98	204.32	205.68	6.23491	6.23428	6.19684	0.71	2.59	0	0.64	0.71		3.23	Hodell et al., 2001	C.mundulus
162-982A-20H-4-W 37	184.08	204.42	205.78	6.23672	6.23672	6.19823	0.64	2.48	0	0.64	0.64	0.64	3.12	Hodell et al., 2001	C.wuellerstorfi
162-982A-20H-4-W 47	184.18	204.52	205.88	6.23852	6.23916	6.19961	0.56	2.48	0	0.64	0.56	0.56	3.12	Hodell et al., 2001	C.wuellerstorfi
162-982A-20H-4-W 47	184.18	204.52	205.88	6.23852	6.23916	6.19961	0.28	2.39	0	0.64	0.28		3.03	Hodell et al., 2001	C.mundulus
162-982A-20H-4-W 57	184.28	204.62	205.98	6.24033	6.2416	6.201	0.38	2.49	0	0.64	0.38		3.13	Hodell et al., 2001	C.mundulus
162-982A-20H-4-W 57	184.28	204.62	205.98	6.24033	6.2416	6.201	0.58	2.43	0	0.64	0.58	0.58	3.07	Hodell et al., 2001	C.wuellerstorfi
162-982A-20H-4-W 67	184.38	204.72	206.08	6.24213	6.24404	6.20262	0.65	2.43	0	0.64	0.65	0.65	3.07	Hodell et al., 2001	C.wuellerstorfi
162-982A-20H-4-W 67	184.38	204.72	206.08	6.24213	6.24404	6.20262	0.32	2.65	0	0.64	0.32		3.29	Hodell et al., 2001	C.mundulus
162-982A-20H-4-W 77	184.48	204.82	206.18	6.24394	6.24648	6.20423	0.59	2.44	0	0.64	0.59	0.59	3.08	Hodell et al., 2001	C.wuellerstorfi
162-982A-20H-4-W 87	184.58	204.92	206.28	6.24574	6.24892	6.20585	0.71	2.31	0	0.64	0.71	0.71	2.95	Hodell et al., 2001	C.wuellerstorfi
162-982A-20H-4-W 87	184.58	204.92	206.28	6.24574	6.24892	6.20585	0.5	2.29	0	0.64	0.5		2.93	Hodell et al., 2001	C.mundulus
162-982C-21H-3-W 7	187.38	207.28	206.33	6.24665	6.25014	6.2449	0.46	2.42	0	0.64	0.46		3.06	Hodell et al., 2001	C.mundulus
162-982C-21H-3-W 7	187.38	207.28	206.33	6.24665	6.25014	6.2449	0.67	2.18	0	0.64	0.67	0.67	2.82	Hodell et al., 2001	C.wuellerstorfi
162-982A-20H-4-W 97	184.68	205.02	206.38	6.24755	6.25136	6.20746	0.99	2.33	0	0.64	0.99	0.99	2.97	Hodell et al., 2001	C.wuellerstorfi
162-982A-20H-4-W 97	184.68	205.02	206.38	6.24755	6.25136	6.20746	0.59	2.28	0	0.64	0.59		2.92	Hodell et al., 2001	C.mundulus
162-982C-21H-3-W 17	187.48	207.38	206.43	6.24845	6.25258	6.24816	0.76	2.29	0	0.64	0.76	0.76	2.93	Hodell et al., 2001	C.wuellerstorfi
162-982A-20H-4-W 107	184.78	205.12	206.48	6.24935	6.2538	6.20908	0.95	2.21	0	0.64	0.95	0.95	2.85	Hodell et al., 2001	C.wuellerstorfi
162-982C-21H-3-W 27	187.58	207.48	206.53	6.25026	6.25502	6.25143	0.81	2.11	0	0.64	0.81	0.81	2.75	Hodell et al., 2001	C.wuellerstorfi
162-982A-20H-4-W 117	184.88	205.22	206.58	6.25116	6.25624	6.21069	0.85	2.02	0	0.64	0.85	0.85	2.66	Hodell et al., 2001	C.wuellerstorfi
162-982A-20H-4-W 117	184.88	205.22	206.58	6.25116	6.25624	6.21069	0.52	2.11	0	0.64	0.52		2.75	Hodell et al., 2001	C.mundulus
162-982C-21H-3-W 37	187.68	207.58	206.63	6.25206	6.25746	6.25469	0.83	2.15	0	0.64	0.83	0.83	2.79	Hodell et al., 2001	C.wuellerstorfi
162-982A-20H-4-W 127	184.98	205.32	206.68	6.25296	6.25868	6.21231	1.05	2.17	0	0.64	1.05	1.05	2.81	Hodell et al., 2001	C.wuellerstorfi
162-982C-21H-3-W 47	187.78	207.68	206.73	6.25387	6.2599	6.25673	0.86	2.1	0	0.64	0.86	0.86	2.74	Hodell et al., 2001	C.wuellerstorfi
162-982A-20H-4-W 137	185.08	205.42	206.78	6.25477	6.26112	6.21392	0.89	2.21	0	0.64	0.89		2.85	Hodell et al., 2001	C.mundulus
162-982A-20H-4-W 137	185.08	205.42	206.78	6.25477	6.26112	6.21392	0.98	2.19	0	0.64	0.98	0.98	2.83	Hodell et al., 2001	C.wuellerstorfi
162-982C-21H-3-W 57	187.88	207.78	206.83	6.25567	6.26234	6.25795	0.89	2.17	0	0.64	0.89		2.81	Hodell et al., 2001	C.mundulus
162-982C-21H-3-W 57	187.88	207.78	206.83	6.25567	6.26234	6.25795	1.08	2.11	0	0.64	1.08	1.08	2.75	Hodell et al., 2001	C.wuellerstorfi
162-982A-20H-4-W 147	185.18	205.52	206.88	6.25658	6.26356	6.21554	1.01	2.16	0	0.64	1.01	1.01	2.8	Hodell et al., 2001	C.wuellerstorfi
162-982C-21H-3-W 67	187.98	207.88	206.93	6.25748	6.26478	6.25917	1.01	2.16	0	0.64	1.01	1.01	2.8	Hodell et al., 2001	C.wuellerstorfi
162-982A-20H-5-W 7	185.28	205.62	206.98	6.25838	6.266	6.21715	1.1	2.28	0	0.64	1.1	1.1	2.92	Hodell et al., 2001	C.wuellerstorfi
162-982C-21H-3-W 77	188.08	207.98	207.03	6.25928	6.26673	6.26039	0.95	2.2	0	0.64	0.95	0.95	2.84	Hodell et al., 2001	C.wuellerstorfi
162-982A-20H-5-W 17	185.38	205.72	207.08	6.26019	6.26747	6.21877	1.08	2.07	0	0.64	1.08	1.08	2.71	Hodell et al., 2001	C.wuellerstorfi
162-982A-20H-5-W 17	185.38	205.72	207.08	6.26019	6.26747	6.21877	0.77	2.28	0	0.64	0.77		2.92	Hodell et al., 2001	C.mundulus
162-982C-21H-3-W 87	188.18	208.08	207.13	6.26109	6.2682	6.26161	1.03	2.08	0	0.64	1.03	1.03	2.72	Hodell et al., 2001	C.wuellerstorfi
162-982C-21H-3-W 87	188.18	208.08	207.13	6.26109	6.2682	6.26161	0.9	2.15	0	0.64	0.9		2.79	Hodell et al., 2001	C.mundulus
162-982A-20H-5-W 27	185.48	205.82	207.18	6.26199	6.26893	6.22038	1.08	2.09	0	0.64	1.08	1.08	2.73	Hodell et al., 2001	C.wuellerstorfi
162-982C-21H-3-W 97	188.28	208.18	207.23	6.26289	6.26967	6.26283	0.97	1.96	0	0.64	0.97	0.97	2.6	Hodell et al., 2001	C.wuellerstorfi
162-982A-20H-5-W 37	185.58	205.92	207.28	6.2638	6.2704	6.222	0.6	2	0	0.64	0.6		2.64	Hodell et al., 2001	C.mundulus
162-982A-20H-5-W 37	185.58	205.92	207.28	6.2638	6.2704	6.222	0.99	2	0	0.64	0.99	0.99	2.64	Hodell et al., 2001	C.wuellerstorfi
162-982C-21H-3-W 107	188.38	208.28	207.33	6.2647	6.27113	6.26405	0.06	2	0	0.64	0.06		2.64	Hodell et al., 2001	C.mundulus
162-982C-21H-3-W 107	188.38	208.28	207.33	6.2647	6.27113	6.26405	0.97	2.12	0	0.64	0.97	0.97	2.76	Hodell et al., 2001	C.wuellerstorfi
162-982A-20H-5-W 47	185.68	206.02	207.38	6.2656	6.27187	6.22349	0.9	2.08	0	0.64	0.9	0.9	2.72	Hodell et al., 2001	C.wuellerstorfi
162-982C-21H-3-W 117	188.48	208.38	207.43	6.2665	6.2726	6.26527	0.79	2.09	0	0.64	0.79	0.79	2.73	Hodell et al., 2001	C.wuellerstorfi
162-982A-20H-5-W 57	185.78	206.12	207.48	6.26741	6.27333	6.22498	1.02	2.15	0	0.64	1.02	1.02	2.79	Hodell et al., 2001	C.wuellerstorfi
162-982A-20H-5-W 57	185.78	206.12	207.48	6.26741	6.27333	6.22498	0.5	1.93	0	0.64	0.5		2.57	Hodell et al., 2001	C.mundulus
162-982C-21H-3-W 127	188.58	208.48	207.53	6.26831	6.27407	6.26649	0.89	2.05	0	0.64	0.89	0.89	2.69	Hodell et al., 2001	C.wuellerstorfi
162-982A-20H-5-W 67	185.88	206.22	207.58	6.26921	6.2748	6.22646	0.91	2.15	0	0.64	0.91	0.91	2.79	Hodell et al., 2001	C.wuellerstorfi
162-982C-21H-3-W 137	188.68	208.58	207.63	6.27012	6.27553	6.26771	0.48	2.01	0	0.64	0.48		2.65	Hodell et al., 2001	C.mundulus
162-982C-21H-3-W 137	188.68	208.58	207.63	6.27012	6.27553	6.26771	0.72	1.95	0	0.64	0.72	0.72	2.59	Hodell et al., 2001	C.wuellerstorfi
162-982A-20H-5-W 77	185.98	206.32	207.68	6.27102	6.27627	6.22795	0.84	2.17	0	0.64	0.84	0.84	2.81	Hodell et al., 2001	C.wuellerstorfi
162-982A-20H-5-W 77	185.98	206.32	207.68	6.27102	6.27627	6.22795	0.67	2.23	0	0.64	0.67		2.87	Hodell et al., 2001	C.mundulus
162-982A-20H-5-W 87	186.08	206.42	207.78	6.27282	6.27773	6.22944	0.61	2.15	0	0.64	0.61		2.79	Hodell et al., 2001	C.mundulus
162-982A-20H-5-W 87	186.08	206.42	207.78	6.27282	6.27773	6.22944	0.98	2.16	0	0.64	0.98	0.98	2.8	Hodell et al., 2001	C.wuellerstorfi
162-982C-21H-4-W 7	188.88	208.78	207.83	6.27373	6.27847	6.27015	0.75	2.17	0	0.64	0.75		2.81	Hodell et al., 2001	C.mundulus
162-982C-21H-4-W 7	188.88	208.78	207.83	6.27373	6.27847	6.27015	0.83	2.19	0	0.64	0.83	0.83	2.83	Hodell et al., 2001	C.wuellerstorfi
162-982A-20H-5-W 97	186.18	206.52	207.88	6.27463	6.2792	6.23093	0.51	2.35	0	0.64	0.51		2.99	Hodell et al., 2001	C.mundulus
162-982C-21H-4-W 17	188.98	208.88	207.93	6.27553	6.27993	6.27137	0.85	2.13	0	0.64	0.85	0.85	2.77	Hodell et al., 2001	C.wuellerstorfi
162-982A-20H-5-W 107	186.28	206.62	207.98	6.27643	6.28067	6.23241	0.47	2.16	0	0.64	0.47		2.8	Hodell et al., 2001	C.mundulus
162-982A-20H-5-W 107	186.28	206.62	207.98	6.27643	6.28067	6.23241	0.8	2.11	0	0.64	0.8	0.8	2.75	Hodell et al., 2001	C.wuellerstorfi
162-982C-21H-4-W 27	189.08	208.98	208.03	6.27734	6.2814	6.27259	0.37	2	0	0.64	0.37		2.64	Hodell et al., 2001	C.mundulus
162-982A-20H-5-W 117	186.38	206.72	208.08	6.27824	6.28213	6.2339	0.62	2.22	0	0.64	0.62	0.62	2.86	Hodell et al., 2001	C.wuellerstorfi
162-982A-20H-5-W 117	186.38	206.72	208.08	6.27824	6.28213	6.2339	0.46	2.35	0	0.64	0.46		2.99	Hodell et al., 2001	C.mundulus
162-982C-21H-4-W 37	189.18	209.08	208.13	6.27914	6.28287	6.2738	0.36	2.24	0	0.64	0.36		2.88	Hodell et al., 2001	C.mundulus
162-982C-21H-4-W 37	189.18	209.08	208.13	6.27914	6.28287	6.2738	0.91	2.18	0	0.64	0.91	0.91	2.82	Hodell et al., 2001	C.wuellerstorfi
162-982A-20H-5-W 127	186.48	206.82	208.18	6.28004	6.2836	6.23539	0.33	2.46	0	0.64	0.33		3.1	Hodell et al., 2001	C.mundulus
162-982A-20H-5-W 127	186.48	206.82	208.18	6.28004	6.2836	6.23539	0.47	2.21	0	0.64	0.47	0.47	2.85	Hodell et al., 2001	C.wuellerstorfi
162-982C-21H-4-W 47	189.28	209.18	208.23	6.28095	6.28433	6.27502	0.54	2.17	0	0.64	0.54		2.81	Hodell et al., 2001	C.mundulus
162-982C-21H-4-W 47	189.28	209.18	208.23	6.28095	6.28433	6.27502	0.62	2.25	0	0.64	0.62	0.62	2.89	Hodell et al., 2001	C.wuellerstorfi
162-982A-20H-5-W 137	186.58	206.92	208.28	6.28185	6.28507	6.23688	0.36	2.59	0	0.64	0.36		3.23	Hodell et al., 2001	C.mundulus
162-982A-20H-5-W 137	186.58	206.92	208.28	6.28185	6.28507	6.23688	0.52	2.41	0	0.64	0.52	0.52	3.05	Hodell et al., 2001	C.wuellerstorfi
162-982C-21H-4-W 57	189.38	209.28	208.33	6.28275	6.2858	6.27652	0.21	2.39	0	0.64	0.21		3.03	Hodell et al., 2001	C.mundulus
162-982C-21H-4-W 57	189.38	209.28	208.33	6.28275	6.2858	6.27652	0.44	2.18	0	0.64	0.44	0.44	2.82	Hodell et al., 2001	C.wuellerstorfi
162-982A-20H-5-W 147	186.68	207.02	208.38	6.28366	6.28653	6.23836	0.2	2.13	0	0.64	0.2	0.2	2.77	Hodell et al., 2001	C.wuellerstorfi
162-982A-20H-5-W 147	186.68	207.02	208.38	6.28366	6.28653	6.23836	0.22	2.49	0	0.64	0.22		3.13	Hodell et al., 2001	C.mundulus
162-982C-21H-4-W 67	189.48	209.38	208.43	6.28456	6.28727	6.27913	0.37	2.05	0	0.64	0.37		2.69	Hodell et al., 2001	C.mundulus
162-982C-21H-4-W 67	189.48	209.38	208.43	6.28456	6.28727	6.27913	0.46	2.2	0	0.64	0.46	0.46	2.84	Hodell et al., 2001	C.wuellerstorfi
162-982A-20H-6-W 7	186.78	207.12	208.48	6.28546	6.288	6.23985	0.08	2.48	0	0.64	0.08		3.12	Hodell et al., 2001	C.mundulus
162-982A-20H-6-W 7	186.78	207.12	208.48	6.28546	6.288	6.23985	0.49	2.41	0	0.64	0.49	0.49	3.05	Hodell et al., 2001	C.wuellerstorfi
162-982C-21H-4-W 77	189.58	209.48	208.53	6.28636	6.28873	6.28174	0.06	2.25	0	0.64	0.06		2.89	Hodell et al., 2001	C.mundulus
162-982C-21H-4-W 77	189.58	209.48	208.53	6.28636	6.28873	6.28174	0.32	2.1	0	0.64	0.32	0.32	2.74	Hodell et al., 2001	C.wuellerstorfi
162-982A-20H-6-W 17	186.88	207.22	208.58	6.28727	6.28947	6.24294	0.31	2.28	0	0.64	0.31		2.92	Hodell et al., 2001	C.mundulus
162-982A-20H-6-W 17	186.88	207.22	208.58	6.28727	6.28947	6.24294	0.5	2.3	0	0.64	0.5	0.5	2.94	Hodell et al., 2001	C.wuellerstorfi
162-982C-21H-4-W 87	189.68	209.58	208.63	6.28817	6.2902	6.28434	0.45	2.26	0	0.64	0.45	0.45	2.9	Hodell et al., 2001	C.wuellerstorfi
162-982C-21H-4-W 87	189.68	209.58	208.63	6.28817	6.2902	6.28434	-0.02	1.98	0	0.64	-0.02		2.62	Hodell et al., 2001	C.mundulus
162-982C-21H-4-W 97	189.78	209.68	208.73	6.28997	6.29167	6.28695	0.39	2.23	0	0.64	0.39	0.39	2.87	Hodell et al., 2001	C.wuellerstorfi
162-982C-21H-4-W 97	189.78	209.68	208.73	6.28997	6.29167	6.28695	-0.16	2.04	0	0.64	-0.16		2.68	Hodell et al., 2001	C.mundulus
162-982C-21H-4-W 107	189.88	209.78	208.83	6.29178	6.29313	6.28956	0.39	2.1	0	0.64	0.39	0.39	2.74	Hodell et al., 2001	C.wuellerstorfi
162-982C-21H-4-W 107	189.88	209.78	208.83	6.29178	6.29313	6.28956	-0.27	2.21	0	0.64	-0.27		2.85	Hodell et al., 2001	C.mundulus
162-982C-21H-4-W 117	189.98	209.88	208.93	6.29358	6.2946	6.29216	0.67	2.18	0	0.64	0.67	0.67	2.82	Hodell et al., 2001	C.wuellerstorfi
162-982C-21H-4-W 117	189.98	209.88	208.93	6.29358	6.2946	6.29216	0.5	2.26	0	0.64	0.5		2.9	Hodell et al., 2001	C.mundulus
162-982C-21H-4-W 127	190.08	209.98	209.03	6.29539	6.29607	6.29477	0.69	2.05	0	0.64	0.69	0.69	2.69	Hodell et al., 2001	C.wuellerstorfi
162-982C-21H-4-W 127	190.08	209.98	209.03	6.29539	6.29607	6.29477	0.51	2.1	0	0.64	0.51		2.74	Hodell et al., 2001	C.mundulus
162-982C-21H-4-W 137	190.18	210.08	209.13	6.29719	6.29753	6.29738	0.68	1.87	0	0.64	0.68	0.68	2.51	Hodell et al., 2001	C.wuellerstorfi
162-982C-21H-4-W 137	190.18	210.08	209.13	6.29719	6.29753	6.29738	0.45	2.07	0	0.64	0.45		2.71	Hodell et al., 2001	C.mundulus
162-982C-21H-4-W 147	190.28	210.18	209.23	6.299	6.299	6.29998	0.76	1.83	0	0.64	0.76	0.76	2.47	Hodell et al., 2001	C.wuellerstorfi
162-982C-21H-5-W 7	190.38	210.28	209.33	6.30147	6.30184	6.30259	0.6	2.11	0	0.64	0.6		2.75	Hodell et al., 2001	C.mundulus
162-982C-21H-5-W 7	190.38	210.28	209.33	6.30147	6.30184	6.30259	0.78	2.1	0	0.64	0.78	0.78	2.74	Hodell et al., 2001	C.wuellerstorfi
162-982C-21H-5-W 17	190.48	210.38	209.43	6.30394	6.30469	6.3052	0.89	2.19	0	0.64	0.89		2.83	Hodell et al., 2001	C.mundulus
162-982C-21H-5-W 17	190.48	210.38	209.43	6.30394	6.30469	6.3052	0.88	2.16	0	0.64	0.88	0.88	2.8	Hodell et al., 2001	C.wuellerstorfi
162-982C-21H-5-W 27	190.58	210.48	209.53	6.30641	6.30753	6.30781	0.82	2.11	0	0.64	0.82	0.82	2.75	Hodell et al., 2001	C.wuellerstorfi
162-982C-21H-5-W 27	190.58	210.48	209.53	6.30641	6.30753	6.30781	0.6	2.25	0	0.64	0.6		2.89	Hodell et al., 2001	C.mundulus
162-982C-21H-5-W 37	190.68	210.58	209.63	6.30888	6.31037	6.31041	0.61	2.18	0	0.64	0.61		2.82	Hodell et al., 2001	C.mundulus
162-982C-21H-5-W 37	190.68	210.58	209.63	6.30888	6.31037	6.31041	0.94	2.17	0	0.64	0.94	0.94	2.81	Hodell et al., 2001	C.wuellerstorfi
162-982C-21H-5-W 47	190.78	210.68	209.73	6.31135	6.31321	6.31302	0.72	2.2	0	0.64	0.72		2.84	Hodell et al., 2001	C.mundulus
162-982C-21H-5-W 47	190.78	210.68	209.73	6.31135	6.31321	6.31302	0.84	2.19	0	0.64	0.84	0.84	2.83	Hodell et al., 2001	C.wuellerstorfi
162-982C-21H-5-W 57	190.88	210.78	209.83	6.31382	6.31606	6.31563	0.7	2.08	0	0.64	0.7	0.7	2.72	Hodell et al., 2001	C.wuellerstorfi
162-982C-21H-5-W 57	190.88	210.78	209.83	6.31382	6.31606	6.31563	0.39	2.06	0	0.64	0.39		2.7	Hodell et al., 2001	C.mundulus
162-982B-21H-3-W 146	190.46	210.06	209.92	6.31605	6.31862	6.29686	0.81	2.3	0	0.64	0.81	0.81	2.94	New data (this study)	C.wuellerstorfi
162-982C-21H-5-W 67	190.98	210.88	209.93	6.31629	6.3189	6.31823	0.75	2.04	0	0.64	0.75	0.75	2.68	Hodell et al., 2001	C.wuellerstorfi
162-982C-21H-5-W 67	190.98	210.88	209.93	6.31629	6.3189	6.31823	0.42	2.16	0	0.64	0.42		2.8	Hodell et al., 2001	C.mundulus
162-982C-21H-5-W 77	191.08	210.98	210.03	6.31876	6.32174	6.32084	0.73	2.09	0	0.64	0.73	0.73	2.73	Hodell et al., 2001	C.wuellerstorfi
162-982C-21H-5-W 77	191.08	210.98	210.03	6.31876	6.32174	6.32084	0.42	2.18	0	0.64	0.42		2.82	Hodell et al., 2001	C.mundulus
162-982B-21H-4-W 8	190.58	210.18	210.04	6.31901	6.32203	6.29998	0.8	2.26	0	0.64	0.8	0.8	2.9	New data (this study)	C.wuellerstorfi
162-982B-21H-4-W 8	190.58	210.18	210.04	6.31901	6.32203	6.29998	0.62	2.29	0	0.64	0.62		2.93	New data (this study)	C.mundulus
162-982C-21H-5-W 87	191.18	211.08	210.13	6.32123	6.32459	6.32345	0.23	2.35	0	0.64	0.23		2.99	Hodell et al., 2001	C.mundulus
162-982C-21H-5-W 87	191.18	211.08	210.13	6.32123	6.32459	6.32345	0.68	2.36	0	0.64	0.68	0.68	3	Hodell et al., 2001	C.wuellerstorfi
162-982B-21H-4-W 18	190.68	210.28	210.14	6.32148	6.32487	6.30259	0.7	2.35	0	0.64	0.7	0.7	2.99	New data (this study)	C.wuellerstorfi
162-982C-21H-5-W 97	191.28	211.18	210.23	6.32371	6.32743	6.32605	0.55	2.11	0	0.64	0.55	0.55	2.75	Hodell et al., 2001	C.wuellerstorfi
162-982C-21H-5-W 97	191.28	211.18	210.23	6.32371	6.32743	6.32605	0	2.19	0	0.64	0		2.83	Hodell et al., 2001	C.mundulus
162-982B-21H-4-W 28	190.78	210.38	210.24	6.32395	6.32771	6.3052	0.4	2.46	0	0.64	0.4	0.4	3.1	New data (this study)	C.wuellerstorfi
162-982C-21H-5-W 107	191.38	211.28	210.33	6.32618	6.33027	6.32866	0.1	2.31	0	0.64	0.1		2.95	Hodell et al., 2001	C.mundulus
162-982C-21H-5-W 107	191.38	211.28	210.33	6.32618	6.33027	6.32866	0.52	2.13	0	0.64	0.52	0.52	2.77	Hodell et al., 2001	C.wuellerstorfi
162-982B-21H-4-W 38	190.88	210.48	210.34	6.32642	6.33055	6.30781	0.64	2.33	0	0.64	0.64	0.64	2.97	New data (this study)	C.wuellerstorfi
162-982C-21H-5-W 117	191.48	211.38	210.43	6.32865	6.33311	6.33127	0.57	2.16	0	0.64	0.57	0.57	2.8	Hodell et al., 2001	C.wuellerstorfi
162-982C-21H-5-W 117	191.48	211.38	210.43	6.32865	6.33311	6.33127	0.22	2.14	0	0.64	0.22		2.78	Hodell et al., 2001	C.mundulus
162-982B-21H-4-W 48	190.98	210.58	210.44	6.32889	6.3334	6.31041	0.55	2.49	0	0.64	0.55		3.13	New data (this study)	C.mundulus
162-982B-21H-4-W 48	190.98	210.58	210.44	6.32889	6.3334	6.31041	0.68	2.38	0	0.64	0.68	0.68	3.02	New data (this study)	C.wuellerstorfi
162-982B-21H-4-W 48	190.98	210.58	210.44	6.32889	6.3334	6.31041	0.55	2.41	0	0.64	0.55	0.55	3.05	New data (this study)	C.wuellerstorfi
162-982C-21H-5-W 127	191.58	211.48	210.53	6.33112	6.33596	6.33388	0.79	2.2	0	0.64	0.79		2.84	Hodell et al., 2001	C.mundulus
162-982C-21H-5-W 127	191.58	211.48	210.53	6.33112	6.33596	6.33388	0.95	2.27	0	0.64	0.95	0.95	2.91	Hodell et al., 2001	C.wuellerstorfi
162-982B-21H-4-W 58	191.08	210.68	210.54	6.33136	6.33624	6.31302	0.71	2.4	0	0.64	0.71	0.71	3.04	New data (this study)	C.wuellerstorfi
162-982C-21H-5-W 137	191.68	211.58	210.63	6.33359	6.3388	6.33648	0.69	2.31	0	0.64	0.69		2.95	Hodell et al., 2001	C.mundulus
162-982C-21H-5-W 137	191.68	211.58	210.63	6.33359	6.3388	6.33648	0.99	2.23	0	0.64	0.99	0.99	2.87	Hodell et al., 2001	C.wuellerstorfi
162-982B-21H-4-W 68	191.18	210.78	210.64	6.33383	6.33908	6.31563	0.95	2.34	0	0.64	0.95	0.95	2.98	New data (this study)	C.wuellerstorfi
162-982C-21H-5-W 147	191.78	211.68	210.73	6.33606	6.34164	6.33909	0.77	2.27	0	0.64	0.77		2.91	Hodell et al., 2001	C.mundulus
162-982C-21H-5-W 147	191.78	211.68	210.73	6.33606	6.34164	6.33909	0.92	2.27	0	0.64	0.92	0.92	2.91	Hodell et al., 2001	C.wuellerstorfi
162-982B-21H-4-W 78	191.28	210.88	210.74	6.3363	6.34193	6.31823	0.86	2.27	0	0.64	0.86	0.86	2.91	New data (this study)	C.wuellerstorfi
162-982B-21H-4-W 88	191.38	210.98	210.84	6.33878	6.34477	6.32084	1.05	2.32	0	0.64	1.05	1.05	2.96	New data (this study)	C.wuellerstorfi
162-982B-21H-4-W 98	191.48	211.08	210.94	6.34125	6.34761	6.32345	1.09	2.39	0	0.64	1.09	1.09	3.03	New data (this study)	C.wuellerstorfi
162-982B-21H-4-W 108	191.58	211.18	211.04	6.34372	6.35045	6.32605	1.01	2.38	0	0.64	1.01	1.01	3.02	New data (this study)	C.wuellerstorfi
162-982B-21H-4-W 118	191.68	211.28	211.14	6.34619	6.3533	6.32866	1.06	2.43	0	0.64	1.06	1.06	3.07	New data (this study)	C.wuellerstorfi
162-982B-21H-4-W 128	191.78	211.38	211.24	6.34866	6.35614	6.33127	1	2.47	0	0.64	1	1	3.11	New data (this study)	C.wuellerstorfi
162-982B-21H-4-W 138	191.88	211.48	211.34	6.35113	6.35898	6.33388	0.88	2.49	0	0.64	0.88	0.88	3.13	New data (this study)	C.wuellerstorfi
162-982B-21H-4-W 146	191.96	211.56	211.42	6.3531	6.36126	6.33596	0.68	2.41	0	0.64	0.68		3.05	New data (this study)	C.mundulus
162-982B-21H-4-W 146	191.96	211.56	211.42	6.3531	6.36126	6.33596	0.98	2.29	0	0.64	0.98	0.98	2.93	New data (this study)	C.wuellerstorfi
162-982B-21H-4-W 146	191.96	211.56	211.42	6.3531	6.36126	6.33596	1.11	2.27	0	0.64	1.11	1.11	2.91	New data (this study)	C.wuellerstorfi
162-982B-21H-5-W 8	192.06	211.66	211.52	6.35557	6.3641	6.33857	1	2.32	0	0.64	1	1	2.96	New data (this study)	C.wuellerstorfi
162-982B-21H-5-W 18	192.16	211.76	211.62	6.35805	6.36694	6.34118	1.01	2.3	0	0.64	1.01	1.01	2.94	New data (this study)	C.wuellerstorfi
162-982B-21H-5-W 28	192.26	211.86	211.72	6.36052	6.36979	6.34488	0.88	2.4	0	0.64	0.88	0.88	3.04	New data (this study)	C.wuellerstorfi
162-982B-21H-5-W 38	192.36	211.96	211.82	6.36299	6.37263	6.34673	0.89	2.24	0	0.64	0.89	0.89	2.88	New data (this study)	C.wuellerstorfi
162-982B-21H-5-W 48	192.46	212.06	211.92	6.36546	6.37547	6.34858	0.84	2.29	0	0.64	0.84	0.84	2.93	New data (this study)	C.wuellerstorfi
162-982B-21H-5-W 58	192.56	212.16	212.02	6.36793	6.37831	6.35043	0.87	2.3	0	0.64	0.87	0.87	2.94	New data (this study)	C.wuellerstorfi
162-982B-21H-5-W 68	192.66	212.26	212.12	6.3704	6.38116	6.35228	0.91	2.25	0	0.64	0.91	0.91	2.89	New data (this study)	C.wuellerstorfi
162-982B-21H-5-W 78	192.76	212.36	212.22	6.37287	6.384	6.35413	0.87	2.18	0	0.64	0.87	0.87	2.82	New data (this study)	C.wuellerstorfi
162-982B-21H-5-W 88	192.86	212.46	212.32	6.37534	6.38585	6.35598	0.92	2.21	0	0.64	0.92	0.92	2.85	New data (this study)	C.wuellerstorfi
162-982B-21H-5-W 98	192.96	212.56	212.42	6.37781	6.38771	6.35782	0.8	2.3	0	0.64	0.8	0.8	2.94	New data (this study)	C.wuellerstorfi
162-982B-21H-5-W 108	193.06	212.66	212.52	6.38028	6.38956	6.35967	0.95	2.28	0	0.64	0.95	0.95	2.92	New data (this study)	C.wuellerstorfi
162-982B-21H-5-W 118	193.16	212.76	212.62	6.38275	6.39141	6.36152	0.91	2.29	0	0.64	0.91	0.91	2.93	New data (this study)	C.wuellerstorfi
162-982B-21H-5-W 128	193.26	212.86	212.72	6.38522	6.39327	6.36337	0.79	2.37	0	0.64	0.79	0.79	3.01	New data (this study)	C.wuellerstorfi
162-982B-21H-5-W 138	193.36	212.96	212.82	6.38769	6.39512	6.36522	0.8	2.35	0	0.64	0.8		2.99	New data (this study)	C.mundulus
162-982B-21H-5-W 138	193.36	212.96	212.82	6.38769	6.39512	6.36522	0.9	2.42	0	0.64	0.9	0.9	3.06	New data (this study)	C.wuellerstorfi
162-982B-21H-5-W 138	193.36	212.96	212.82	6.38769	6.39512	6.36522	0.89	2.05	0	0.64	0.89	0.89	2.69	New data (this study)	C.wuellerstorfi
162-982B-21H-5-W 138	193.36	212.96	212.82	6.38769	6.39512	6.36522	0.87	2.34	0	0.64	0.87	0.87	2.98	New data (this study)	C.wuellerstorfi
162-982B-21H-5-W 148	193.46	213.06	212.92	6.39016	6.39697	6.36707	0.77	2.34	0	0.64	0.77	0.77	2.98	New data (this study)	C.wuellerstorfi
162-982B-21H-6-W 8	193.56	213.16	213.02	6.39263	6.39883	6.36892	0.69	2.46	0	0.64	0.69	0.69	3.1	New data (this study)	C.wuellerstorfi
162-982B-21H-6-W 18	193.66	213.26	213.12	6.3951	6.40068	6.37076	0.63	2.47	0	0.64	0.63	0.63	3.11	New data (this study)	C.wuellerstorfi
162-982B-21H-6-W 28	193.76	213.36	213.22	6.39757	6.40253	6.37261	0.82	2.27	0	0.64	0.82	0.82	2.91	New data (this study)	C.wuellerstorfi
162-982B-21H-6-W 38	193.86	213.46	213.32	6.40004	6.40439	6.37446	0.44	2.26	0	0.64	0.44	0.44	2.9	New data (this study)	C.wuellerstorfi
162-982B-21H-6-W 38	193.86	213.46	213.32	6.40004	6.40439	6.37446	0.36	2.43	0	0.64	0.36		3.07	New data (this study)	C.mundulus
162-982B-21H-6-W 38	193.86	213.46	213.32	6.40004	6.40439	6.37446	0.38	2.52	0	0.64	0.38		3.16	New data (this study)	C.mundulus
162-982B-21H-6-W 48	193.96	213.56	213.42	6.40251	6.40624	6.37631	0.8	2.41	0	0.64	0.8	0.8	3.05	New data (this study)	C.wuellerstorfi
162-982B-21H-6-W 58	194.06	213.66	213.52	6.40498	6.40809	6.37816	0.71	2.33	0	0.64	0.71		2.97	New data (this study)	C.mundulus
162-982B-21H-6-W 68	194.16	213.76	213.62	6.40746	6.40995	6.38001	1	2.28	0	0.64	1	1	2.92	New data (this study)	C.wuellerstorfi
162-982A-21H-2-W 47	190.68	211.73	213.64	6.40795	6.41032	6.34039	0.98	2.08	0	0.64	0.98	0.98	2.72	Hodell et al., 2001	C.wuellerstorfi
162-982A-21H-2-W 47	190.68	211.73	213.64	6.40795	6.41032	6.34039	0.84	2.1	0	0.64	0.84		2.74	Hodell et al., 2001	C.mundulus
162-982B-21H-6-W 78	194.26	213.86	213.72	6.40993	6.4118	6.38186	0.85	2.25	0	0.64	0.85		2.89	New data (this study)	C.mundulus
162-982A-21H-2-W 57	190.78	211.83	213.74	6.41042	6.41217	6.34433	0.81	2.05	0	0.64	0.81		2.69	Hodell et al., 2001	C.mundulus
162-982A-21H-2-W 57	190.78	211.83	213.74	6.41042	6.41217	6.34433	0.93	2.1	0	0.64	0.93	0.93	2.74	Hodell et al., 2001	C.wuellerstorfi
162-982B-21H-6-W 88	194.36	213.96	213.82	6.4124	6.41365	6.38371	0.94	2.1	0	0.64	0.94		2.74	New data (this study)	C.mundulus
162-982A-21H-2-W 67	190.88	211.93	213.84	6.41289	6.41403	6.34618	0.87	2.1	0	0.64	0.87		2.74	Hodell et al., 2001	C.mundulus
162-982A-21H-2-W 67	190.88	211.93	213.84	6.41289	6.41403	6.34618	0.98	2.05	0	0.64	0.98	0.98	2.69	Hodell et al., 2001	C.wuellerstorfi
162-982B-21H-6-W 98	194.46	214.06	213.92	6.41487	6.41551	6.38572	0.87	2.17	0	0.64	0.87	0.87	2.81	New data (this study)	C.wuellerstorfi
162-982A-21H-2-W 77	190.98	212.03	213.94	6.41536	6.41588	6.34803	0.95	2.05	0	0.64	0.95	0.95	2.69	Hodell et al., 2001	C.wuellerstorfi
162-982A-21H-2-W 77	190.98	212.03	213.94	6.41536	6.41588	6.34803	0.85	2	0	0.64	0.85		2.64	Hodell et al., 2001	C.mundulus
162-982A-21H-2-W 87	191.08	212.13	214.04	6.41783	6.41773	6.34987	0.83	2.02	0	0.64	0.83	0.83	2.66	Hodell et al., 2001	C.wuellerstorfi
162-982A-21H-2-W 87	191.08	212.13	214.04	6.41783	6.41773	6.34987	0.82	1.97	0	0.64	0.82		2.61	Hodell et al., 2001	C.mundulus
162-982A-21H-2-W 97	191.18	212.23	214.14	6.4203	6.41959	6.35172	0.91	1.91	0	0.64	0.91	0.91	2.55	Hodell et al., 2001	C.wuellerstorfi
162-982A-21H-2-W 97	191.18	212.23	214.14	6.4203	6.41959	6.35172	0.86	1.99	0	0.64	0.86		2.63	Hodell et al., 2001	C.mundulus
162-982A-21H-2-W 107	191.28	212.33	214.24	6.42277	6.42144	6.35357	0.89	1.96	0	0.64	0.89		2.6	Hodell et al., 2001	C.mundulus
162-982A-21H-2-W 107	191.28	212.33	214.24	6.42277	6.42144	6.35357	0.94	1.97	0	0.64	0.94	0.94	2.61	Hodell et al., 2001	C.wuellerstorfi
162-982A-21H-2-W 117	191.38	212.43	214.34	6.42524	6.42329	6.35542	0.91	2.02	0	0.64	0.91	0.91	2.66	Hodell et al., 2001	C.wuellerstorfi
162-982A-21H-2-W 117	191.38	212.43	214.34	6.42524	6.42329	6.35542	0.89	2	0	0.64	0.89		2.64	Hodell et al., 2001	C.mundulus
162-982A-21H-2-W 127	191.48	212.53	214.44	6.42771	6.42515	6.35727	0.91	1.96	0	0.64	0.91	0.91	2.6	Hodell et al., 2001	C.wuellerstorfi
162-982A-21H-2-W 127	191.48	212.53	214.44	6.42771	6.42515	6.35727	0.76	1.86	0	0.64	0.76		2.5	Hodell et al., 2001	C.mundulus
162-982A-21H-2-W 137	191.58	212.63	214.54	6.43018	6.427	6.35912	0.79	1.88	0	0.64	0.79	0.79	2.52	Hodell et al., 2001	C.wuellerstorfi
162-982A-21H-2-W 137	191.58	212.63	214.54	6.43018	6.427	6.35912	0.68	1.93	0	0.64	0.68		2.57	Hodell et al., 2001	C.mundulus
162-982A-21H-2-W 146	191.67	212.72	214.63	6.43241	6.42964	6.36078	0.74	1.94	0	0.64	0.74	0.74	2.58	Hodell et al., 2001	C.wuellerstorfi
162-982A-21H-2-W 146	191.67	212.72	214.63	6.43241	6.42964	6.36078	0.75	1.96	0	0.64	0.75		2.6	Hodell et al., 2001	C.mundulus
162-982A-21H-3-W 7	191.78	212.83	214.74	6.43513	6.43286	6.36282	0.58	2.12	0	0.64	0.58	0.58	2.76	Hodell et al., 2001	C.wuellerstorfi
162-982A-21H-3-W 7	191.78	212.83	214.74	6.43513	6.43286	6.36282	0.27	2.12	0	0.64	0.27		2.76	Hodell et al., 2001	C.mundulus
162-982A-21H-3-W 17	191.88	212.93	214.84	6.4376	6.43579	6.36466	0.6	2.19	0	0.64	0.6	0.6	2.83	Hodell et al., 2001	C.wuellerstorfi
162-982A-21H-3-W 17	191.88	212.93	214.84	6.4376	6.43579	6.36466	0.55	2.16	0	0.64	0.55		2.8	Hodell et al., 2001	C.mundulus
162-982A-21H-3-W 27	191.98	213.03	214.94	6.44007	6.43871	6.36651	0.7	2.19	0	0.64	0.7	0.7	2.83	Hodell et al., 2001	C.wuellerstorfi
162-982A-21H-3-W 27	191.98	213.03	214.94	6.44007	6.43871	6.36651	0.34	2.29	0	0.64	0.34		2.93	Hodell et al., 2001	C.mundulus
162-982A-21H-3-W 37	192.08	213.13	215.04	6.44254	6.44164	6.36836	0.57	2.2	0	0.64	0.57		2.84	Hodell et al., 2001	C.mundulus
162-982A-21H-3-W 37	192.08	213.13	215.04	6.44254	6.44164	6.36836	0.8	2.02	0	0.64	0.8	0.8	2.66	Hodell et al., 2001	C.wuellerstorfi
162-982A-21H-3-W 47	192.18	213.23	215.14	6.44501	6.44457	6.37021	0.89	2.25	0	0.64	0.89	0.89	2.89	Hodell et al., 2001	C.wuellerstorfi
162-982A-21H-3-W 47	192.18	213.23	215.14	6.44501	6.44457	6.37021	0.37	2.14	0	0.64	0.37		2.78	Hodell et al., 2001	C.mundulus
162-982A-21H-3-W 57	192.28	213.33	215.24	6.44748	6.4475	6.37206	0.81	2.1	0	0.64	0.81		2.74	Hodell et al., 2001	C.mundulus
162-982A-21H-3-W 57	192.28	213.33	215.24	6.44748	6.4475	6.37206	0.95	2.15	0	0.64	0.95	0.95	2.79	Hodell et al., 2001	C.wuellerstorfi
162-982A-21H-3-W 67	192.38	213.43	215.34	6.44995	6.45043	6.37391	0.94	2.14	0	0.64	0.94	0.94	2.78	Hodell et al., 2001	C.wuellerstorfi
162-982A-21H-3-W 67	192.38	213.43	215.34	6.44995	6.45043	6.37391	0.73	2.16	0	0.64	0.73		2.8	Hodell et al., 2001	C.mundulus
162-982A-21H-3-W 77	192.48	213.53	215.44	6.45242	6.45336	6.37576	0.55	2.05	0	0.64	0.55		2.69	Hodell et al., 2001	C.mundulus
162-982A-21H-3-W 77	192.48	213.53	215.44	6.45242	6.45336	6.37576	0.98	2.06	0	0.64	0.98	0.98	2.7	Hodell et al., 2001	C.wuellerstorfi
162-982A-21H-3-W 87	192.58	213.63	215.54	6.45489	6.45629	6.3776	0.88	2.09	0	0.64	0.88		2.73	Hodell et al., 2001	C.mundulus
162-982A-21H-3-W 87	192.58	213.63	215.54	6.45489	6.45629	6.3776	1	2.1	0	0.64	1	1	2.74	Hodell et al., 2001	C.wuellerstorfi
162-982A-21H-3-W 97	192.68	213.73	215.64	6.45736	6.45921	6.37945	0.78	2.1	0	0.64	0.78		2.74	Hodell et al., 2001	C.mundulus
162-982A-21H-3-W 97	192.68	213.73	215.64	6.45736	6.45921	6.37945	0.91	2.05	0	0.64	0.91	0.91	2.69	Hodell et al., 2001	C.wuellerstorfi
162-982A-21H-3-W 107	192.78	213.83	215.74	6.45983	6.46214	6.3813	0.83	2.04	0	0.64	0.83		2.68	Hodell et al., 2001	C.mundulus
162-982A-21H-3-W 107	192.78	213.83	215.74	6.45983	6.46214	6.3813	0.79	1.94	0	0.64	0.79	0.79	2.58	Hodell et al., 2001	C.wuellerstorfi
162-982A-21H-3-W 117	192.88	213.93	215.84	6.4623	6.46507	6.38315	0.86	2.11	0	0.64	0.86		2.75	Hodell et al., 2001	C.mundulus
162-982A-21H-3-W 117	192.88	213.93	215.84	6.4623	6.46507	6.38315	1.02	2.18	0	0.64	1.02	1.02	2.82	Hodell et al., 2001	C.wuellerstorfi
162-982A-21H-3-W 127	192.98	214.03	215.94	6.46477	6.468	6.385	0.69	1.95	0	0.64	0.69		2.59	Hodell et al., 2001	C.mundulus
162-982A-21H-3-W 127	192.98	214.03	215.94	6.46477	6.468	6.385	0.73	1.98	0	0.64	0.73	0.73	2.62	Hodell et al., 2001	C.wuellerstorfi
162-982A-21H-3-W 137	193.08	214.13	216.04	6.46724	6.46982	6.38739	0.86	2.07	0	0.64	0.86	0.86	2.71	Hodell et al., 2001	C.wuellerstorfi
162-982A-21H-3-W 137	193.08	214.13	216.04	6.46724	6.46982	6.38739	0.67	2	0	0.64	0.67		2.64	Hodell et al., 2001	C.mundulus
162-982A-21H-3-W 147	193.18	214.23	216.14	6.46971	6.47164	6.38978	0.54	2.11	0	0.64	0.54		2.75	Hodell et al., 2001	C.mundulus
162-982A-21H-3-W 147	193.18	214.23	216.14	6.46971	6.47164	6.38978	0.55	2.16	0	0.64	0.55	0.55	2.8	Hodell et al., 2001	C.wuellerstorfi
162-982A-21H-4-W 7	193.28	214.33	216.24	6.47218	6.47345	6.39217	0.64	2.11	0	0.64	0.64		2.75	Hodell et al., 2001	C.mundulus
162-982A-21H-4-W 7	193.28	214.33	216.24	6.47218	6.47345	6.39217	0.45	2.01	0	0.64	0.45	0.45	2.65	Hodell et al., 2001	C.wuellerstorfi
162-982A-21H-4-W 17	193.38	214.43	216.34	6.47465	6.47527	6.39456	0.57	2.03	0	0.64	0.57		2.67	Hodell et al., 2001	C.mundulus
162-982A-21H-4-W 17	193.38	214.43	216.34	6.47465	6.47527	6.39456	0.72	2.11	0	0.64	0.72	0.72	2.75	Hodell et al., 2001	C.wuellerstorfi
162-982A-21H-4-W 27	193.48	214.53	216.44	6.47712	6.47709	6.39694	0.53	2.23	0	0.64	0.53		2.87	Hodell et al., 2001	C.mundulus
162-982A-21H-4-W 27	193.48	214.53	216.44	6.47712	6.47709	6.39694	0.61	2.28	0	0.64	0.61	0.61	2.92	Hodell et al., 2001	C.wuellerstorfi
162-982A-21H-4-W 37	193.58	214.63	216.54	6.47959	6.47891	6.39933	0.85	2.19	0	0.64	0.85		2.83	Hodell et al., 2001	C.mundulus
162-982A-21H-4-W 37	193.58	214.63	216.54	6.47959	6.47891	6.39933	0.77	2.07	0	0.64	0.77	0.77	2.71	Hodell et al., 2001	C.wuellerstorfi
162-982A-21H-4-W 47	193.68	214.73	216.64	6.48206	6.48073	6.40172	0.62	2.17	0	0.64	0.62		2.81	Hodell et al., 2001	C.mundulus
162-982A-21H-4-W 47	193.68	214.73	216.64	6.48206	6.48073	6.40172	0.84	2.17	0	0.64	0.84	0.84	2.81	Hodell et al., 2001	C.wuellerstorfi
162-982A-21H-4-W 57	193.78	214.83	216.74	6.48454	6.48255	6.40411	0.81	2.2	0	0.64	0.81		2.84	Hodell et al., 2001	C.mundulus
162-982A-21H-4-W 57	193.78	214.83	216.74	6.48454	6.48255	6.40411	0.84	2.18	0	0.64	0.84	0.84	2.82	Hodell et al., 2001	C.wuellerstorfi
162-982A-21H-4-W 67	193.88	214.93	216.84	6.48701	6.48436	6.4065	0.86	2.29	0	0.64	0.86		2.93	Hodell et al., 2001	C.mundulus
162-982A-21H-4-W 67	193.88	214.93	216.84	6.48701	6.48436	6.4065	0.88	2.15	0	0.64	0.88	0.88	2.79	Hodell et al., 2001	C.wuellerstorfi
162-982A-21H-4-W 77	193.98	215.03	216.94	6.48948	6.48618	6.40889	0.9	2.09	0	0.64	0.9		2.73	Hodell et al., 2001	C.mundulus
162-982A-21H-4-W 87	194.08	215.13	217.04	6.49195	6.488	6.41128	0.31	2.09	0	0.64	0.31		2.73	Hodell et al., 2001	C.mundulus
162-982A-21H-4-W 87	194.08	215.13	217.04	6.49195	6.488	6.41128	0.78	2.11	0	0.64	0.78	0.78	2.75	Hodell et al., 2001	C.wuellerstorfi
162-982A-21H-4-W 97	194.18	215.23	217.14	6.49442	6.48982	6.41367	0.82	2.12	0	0.64	0.82		2.76	Hodell et al., 2001	C.mundulus
162-982A-21H-4-W 97	194.18	215.23	217.14	6.49442	6.48982	6.41367	0.77	2.09	0	0.64	0.77	0.77	2.73	Hodell et al., 2001	C.wuellerstorfi
162-982A-21H-4-W 107	194.28	215.33	217.24	6.49689	6.49164	6.41606	0.71	2.02	0	0.64	0.71		2.66	Hodell et al., 2001	C.mundulus
162-982A-21H-4-W 107	194.28	215.33	217.24	6.49689	6.49164	6.41606	0.74	2.09	0	0.64	0.74	0.74	2.73	Hodell et al., 2001	C.wuellerstorfi
162-982A-21H-4-W 117	194.38	215.43	217.34	6.49936	6.49345	6.41844	0.64	1.98	0	0.64	0.64		2.62	Hodell et al., 2001	C.mundulus
162-982A-21H-4-W 117	194.38	215.43	217.34	6.49936	6.49345	6.41844	0.63	2.05	0	0.64	0.63	0.63	2.69	Hodell et al., 2001	C.wuellerstorfi
162-982A-21H-4-W 127	194.48	215.53	217.44	6.50183	6.49527	6.42083	0.83	2.05	0	0.64	0.83		2.69	Hodell et al., 2001	C.mundulus
162-982A-21H-4-W 127	194.48	215.53	217.44	6.50183	6.49527	6.42083	0.67	1.99	0	0.64	0.67	0.67	2.63	Hodell et al., 2001	C.wuellerstorfi
162-982A-21H-4-W 137	194.58	215.63	217.54	6.5043	6.49709	6.42322	0.82	1.99	0	0.64	0.82		2.63	Hodell et al., 2001	C.mundulus
162-982A-21H-4-W 137	194.58	215.63	217.54	6.5043	6.49709	6.42322	0.89	2.08	0	0.64	0.89	0.89	2.72	Hodell et al., 2001	C.wuellerstorfi
162-982A-21H-4-W 142	194.63	215.68	217.59	6.50553	6.498	6.42442	0.74	2.02	0	0.64	0.74		2.66	Hodell et al., 2001	C.mundulus
162-982A-21H-4-W 142	194.63	215.68	217.59	6.50553	6.498	6.42442	0.84	2.01	0	0.64	0.84	0.84	2.65	Hodell et al., 2001	C.wuellerstorfi
162-982A-21H-5-W 7	194.78	215.83	217.74	6.50924	6.50073	6.428	0.62	2.02	0	0.64	0.62		2.66	Hodell et al., 2001	C.mundulus
162-982A-21H-5-W 7	194.78	215.83	217.74	6.50924	6.50073	6.428	0.91	2.02	0	0.64	0.91	0.91	2.66	Hodell et al., 2001	C.wuellerstorfi
162-982A-21H-5-W 17	194.88	215.93	217.84	6.51171	6.50255	6.42973	0.73	1.98	0	0.64	0.73		2.62	Hodell et al., 2001	C.mundulus
162-982A-21H-5-W 17	194.88	215.93	217.84	6.51171	6.50255	6.42973	0.87	2.08	0	0.64	0.87	0.87	2.72	Hodell et al., 2001	C.wuellerstorfi
162-982A-21H-5-W 27	194.98	216.03	217.94	6.51418	6.50436	6.43145	0.74	2.02	0	0.64	0.74		2.66	Hodell et al., 2001	C.mundulus
162-982A-21H-5-W 27	194.98	216.03	217.94	6.51418	6.50436	6.43145	0.87	2.04	0	0.64	0.87	0.87	2.68	Hodell et al., 2001	C.wuellerstorfi
162-982A-21H-5-W 37	195.08	216.13	218.04	6.51665	6.50618	6.43318	0.79	2.2	0	0.64	0.79		2.84	Hodell et al., 2001	C.mundulus
162-982A-21H-5-W 37	195.08	216.13	218.04	6.51665	6.50618	6.43318	0.94	2.11	0	0.64	0.94	0.94	2.75	Hodell et al., 2001	C.wuellerstorfi
162-982A-21H-5-W 47	195.18	216.23	218.14	6.51912	6.508	6.43491	0.69	1.98	0	0.64	0.69		2.62	Hodell et al., 2001	C.mundulus
162-982A-21H-5-W 47	195.18	216.23	218.14	6.51912	6.508	6.43491	0.9	2.15	0	0.64	0.9	0.9	2.79	Hodell et al., 2001	C.wuellerstorfi
162-982A-21H-5-W 57	195.28	216.33	218.24	6.52159	6.51065	6.43664	0.73	2.02	0	0.64	0.73		2.66	Hodell et al., 2001	C.mundulus
162-982A-21H-5-W 57	195.28	216.33	218.24	6.52159	6.51065	6.43664	0.86	2.08	0	0.64	0.86	0.86	2.72	Hodell et al., 2001	C.wuellerstorfi
162-982A-21H-5-W 67	195.38	216.43	218.34	6.52406	6.51329	6.43836	0.79	2.06	0	0.64	0.79		2.7	Hodell et al., 2001	C.mundulus
162-982A-21H-5-W 67	195.38	216.43	218.34	6.52406	6.51329	6.43836	0.94	2.12	0	0.64	0.94	0.94	2.76	Hodell et al., 2001	C.wuellerstorfi
162-982A-21H-5-W 77	195.48	216.53	218.44	6.52653	6.51594	6.44009	0.68	2.12	0	0.64	0.68		2.76	Hodell et al., 2001	C.mundulus
162-982A-21H-5-W 77	195.48	216.53	218.44	6.52653	6.51594	6.44009	0.76	2.02	0	0.64	0.76	0.76	2.66	Hodell et al., 2001	C.wuellerstorfi
162-982A-21H-5-W 87	195.58	216.63	218.54	6.529	6.51858	6.44182	0.68	2.06	0	0.64	0.68		2.7	Hodell et al., 2001	C.mundulus
162-982A-21H-5-W 87	195.58	216.63	218.54	6.529	6.51858	6.44182	0.75	2.07	0	0.64	0.75	0.75	2.71	Hodell et al., 2001	C.wuellerstorfi
162-982A-21H-5-W 97	195.68	216.73	218.64	6.53148	6.52123	6.44355	0.71	2.17	0	0.64	0.71		2.81	Hodell et al., 2001	C.mundulus
162-982A-21H-5-W 107	195.78	216.83	218.74	6.53395	6.52387	6.44527	0.76	2.24	0	0.64	0.76		2.88	Hodell et al., 2001	C.mundulus
162-982A-21H-5-W 107	195.78	216.83	218.74	6.53395	6.52387	6.44527	0.84	2.25	0	0.64	0.84	0.84	2.89	Hodell et al., 2001	C.wuellerstorfi
162-982A-21H-5-W 117	195.88	216.93	218.84	6.53642	6.52652	6.447	0.61	2.14	0	0.64	0.61		2.78	Hodell et al., 2001	C.mundulus
162-982A-21H-5-W 117	195.88	216.93	218.84	6.53642	6.52652	6.447	0.81	2.13	0	0.64	0.81	0.81	2.77	Hodell et al., 2001	C.wuellerstorfi
162-982A-21H-5-W 127	195.98	217.03	218.94	6.53889	6.52917	6.45019	0.89	2.23	0	0.64	0.89		2.87	Hodell et al., 2001	C.mundulus
162-982A-21H-5-W 127	195.98	217.03	218.94	6.53889	6.52917	6.45019	0.95	2.28	0	0.64	0.95	0.95	2.92	Hodell et al., 2001	C.wuellerstorfi
162-982A-21H-5-W 137	196.08	217.13	219.04	6.54136	6.53181	6.45338	0.78	2.11	0	0.64	0.78		2.75	Hodell et al., 2001	C.mundulus
162-982A-21H-5-W 137	196.08	217.13	219.04	6.54136	6.53181	6.45338	0.82	2.2	0	0.64	0.82	0.82	2.84	Hodell et al., 2001	C.wuellerstorfi
162-982A-21H-5-W 147	196.18	217.23	219.14	6.54383	6.53446	6.45658	0.83	2.14	0	0.64	0.83		2.78	Hodell et al., 2001	C.mundulus
162-982A-21H-5-W 147	196.18	217.23	219.14	6.54383	6.53446	6.45658	0.78	2.04	0	0.64	0.78	0.78	2.68	Hodell et al., 2001	C.wuellerstorfi
162-982A-21H-6-W 7	196.28	217.33	219.24	6.5463	6.5371	6.45977	0.91	2.27	0	0.64	0.91		2.91	Hodell et al., 2001	C.mundulus
162-982A-21H-6-W 7	196.28	217.33	219.24	6.5463	6.5371	6.45977	0.84	2.09	0	0.64	0.84	0.84	2.73	Hodell et al., 2001	C.wuellerstorfi
162-982A-21H-6-W 17	196.38	217.43	219.34	6.54877	6.53975	6.46296	0.91	2.03	0	0.64	0.91		2.67	Hodell et al., 2001	C.mundulus
162-982A-21H-6-W 17	196.38	217.43	219.34	6.54877	6.53975	6.46296	0.89	2.12	0	0.64	0.89	0.89	2.76	Hodell et al., 2001	C.wuellerstorfi
162-982A-21H-6-W 27	196.48	217.53	219.44	6.55124	6.54239	6.46615	0.78	2.07	0	0.64	0.78	0.78	2.71	Hodell et al., 2001	C.wuellerstorfi
162-982A-21H-6-W 27	196.48	217.53	219.44	6.55124	6.54239	6.46615	0.81	2.18	0	0.64	0.81		2.82	Hodell et al., 2001	C.mundulus
162-982A-21H-6-W 37	196.58	217.63	219.54	6.55371	6.54504	6.46934	0.84	2.09	0	0.64	0.84	0.84	2.73	Hodell et al., 2001	C.wuellerstorfi
162-982A-21H-6-W 37	196.58	217.63	219.54	6.55371	6.54504	6.46934	0.76	2.25	0	0.64	0.76		2.89	Hodell et al., 2001	C.mundulus
162-982A-21H-6-W 47	196.68	217.73	219.64	6.55618	6.54769	6.47254	0.91	2.19	0	0.64	0.91	0.91	2.83	Hodell et al., 2001	C.wuellerstorfi
162-982A-21H-6-W 47	196.68	217.73	219.64	6.55618	6.54769	6.47254	0.02	2.27	0	0.64	0.02		2.91	Hodell et al., 2001	C.mundulus
162-982A-21H-6-W 57	196.78	217.83	219.74	6.55865	6.55033	6.47573	0.82	2.16	0	0.64	0.82	0.82	2.8	Hodell et al., 2001	C.wuellerstorfi
162-982A-21H-6-W 57	196.78	217.83	219.74	6.55865	6.55033	6.47573	0.79	2.08	0	0.64	0.79		2.72	Hodell et al., 2001	C.mundulus
162-982A-21H-6-W 67	196.88	217.93	219.84	6.56112	6.55298	6.47892	0.76	2.17	0	0.64	0.76	0.76	2.81	Hodell et al., 2001	C.wuellerstorfi
162-982A-21H-6-W 67	196.88	217.93	219.84	6.56112	6.55298	6.47892	0.79	2.12	0	0.64	0.79		2.76	Hodell et al., 2001	C.mundulus
162-982A-21H-6-W 77	196.98	218.03	219.94	6.56359	6.55562	6.48211	0.74	2.12	0	0.64	0.74	0.74	2.76	Hodell et al., 2001	C.wuellerstorfi
162-982A-21H-6-W 77	196.98	218.03	219.94	6.56359	6.55562	6.48211	0.62	2.17	0	0.64	0.62		2.81	Hodell et al., 2001	C.mundulus
162-982A-21H-6-W 87	197.08	218.13	220.04	6.56606	6.55827	6.4853	0.52	2.22	0	0.64	0.52		2.86	Hodell et al., 2001	C.mundulus
162-982A-21H-6-W 87	197.08	218.13	220.04	6.56606	6.55827	6.4853	0.89	2.19	0	0.64	0.89	0.89	2.83	Hodell et al., 2001	C.wuellerstorfi
162-982A-21H-6-W 97	197.18	218.23	220.14	6.56853	6.56091	6.4885	0.69	2.08	0	0.64	0.69		2.72	Hodell et al., 2001	C.mundulus
162-982A-21H-6-W 97	197.18	218.23	220.14	6.56853	6.56091	6.4885	0.69	2.11	0	0.64	0.69	0.69	2.75	Hodell et al., 2001	C.wuellerstorfi
162-982A-21H-6-W 107	197.28	218.33	220.24	6.571	6.56356	6.49169	0.71	2.08	0	0.64	0.71	0.71	2.72	Hodell et al., 2001	C.wuellerstorfi
162-982A-21H-6-W 107	197.28	218.33	220.24	6.571	6.56356	6.49169	0.66	2.17	0	0.64	0.66		2.81	Hodell et al., 2001	C.mundulus
162-982A-21H-6-W 117	197.38	218.43	220.34	6.57347	6.5662	6.49488	0.59	2.16	0	0.64	0.59	0.59	2.8	Hodell et al., 2001	C.wuellerstorfi
162-982A-21H-6-W 117	197.38	218.43	220.34	6.57347	6.5662	6.49488	0.56	2.21	0	0.64	0.56		2.85	Hodell et al., 2001	C.mundulus
162-982A-21H-6-W 127	197.48	218.53	220.44	6.57594	6.56885	6.49807	0.62	2.25	0	0.64	0.62	0.62	2.89	Hodell et al., 2001	C.wuellerstorfi
162-982A-21H-6-W 127	197.48	218.53	220.44	6.57594	6.56885	6.49807	0.27	2.3	0	0.64	0.27		2.94	Hodell et al., 2001	C.mundulus
162-982A-21H-6-W 137	197.58	218.63	220.54	6.57841	6.5715	6.50126	0.49	2.18	0	0.64	0.49	0.49	2.82	Hodell et al., 2001	C.wuellerstorfi
162-982A-21H-6-W 137	197.58	218.63	220.54	6.57841	6.5715	6.50126	0.29	2.15	0	0.64	0.29		2.79	Hodell et al., 2001	C.mundulus
162-982C-22H-5-W 37	200.18	219.06	220.57	6.57916	6.57229	6.51499	0.68	2.11	0	0.64	0.68	0.68	2.75	Hodell et al., 2001	C.wuellerstorfi
162-982C-22H-5-W 37	200.18	219.06	220.57	6.57916	6.57229	6.51499	0.66	2.06	0	0.64	0.66		2.7	Hodell et al., 2001	C.mundulus
162-982A-21H-6-W 147	197.68	218.73	220.64	6.58089	6.57414	6.50446	0.2	2.31	0	0.64	0.2		2.95	Hodell et al., 2001	C.mundulus
162-982A-21H-6-W 147	197.68	218.73	220.64	6.58089	6.57414	6.50446	0.38	2.15	0	0.64	0.38	0.38	2.79	Hodell et al., 2001	C.wuellerstorfi
162-982C-22H-5-W 47	200.28	219.16	220.67	6.58163	6.57494	6.51818	0.66	2.02	0	0.64	0.66		2.66	Hodell et al., 2001	C.mundulus
162-982C-22H-5-W 47	200.28	219.16	220.67	6.58163	6.57494	6.51818	0.74	2.13	0	0.64	0.74	0.74	2.77	Hodell et al., 2001	C.wuellerstorfi
162-982A-21H-7-W 7	197.78	218.83	220.74	6.58336	6.57679	6.50765	0.31	2.27	0	0.64	0.31		2.91	Hodell et al., 2001	C.mundulus
162-982A-21H-7-W 7	197.78	218.83	220.74	6.58336	6.57679	6.50765	0.66	2.27	0	0.64	0.66	0.66	2.91	Hodell et al., 2001	C.wuellerstorfi
162-982C-22H-5-W 57	200.38	219.26	220.77	6.5841	6.57758	6.52137	0.52	2.21	0	0.64	0.52		2.85	Hodell et al., 2001	C.mundulus
162-982C-22H-5-W 57	200.38	219.26	220.77	6.5841	6.57758	6.52137	0.35	2.23	0	0.64	0.35	0.35	2.87	Hodell et al., 2001	C.wuellerstorfi
162-982A-21H-7-W 17	197.88	218.93	220.84	6.58583	6.57943	6.51084	0.45	2.29	0	0.64	0.45		2.93	Hodell et al., 2001	C.mundulus
162-982A-21H-7-W 17	197.88	218.93	220.84	6.58583	6.57943	6.51084	0.73	2.2	0	0.64	0.73	0.73	2.84	Hodell et al., 2001	C.wuellerstorfi
162-982C-22H-5-W 67	200.48	219.36	220.87	6.58657	6.58023	6.52456	0.37	2.29	0	0.64	0.37		2.93	Hodell et al., 2001	C.mundulus
162-982C-22H-5-W 67	200.48	219.36	220.87	6.58657	6.58023	6.52456	0.55	2.21	0	0.64	0.55	0.55	2.85	Hodell et al., 2001	C.wuellerstorfi
162-982A-21H-7-W 27	197.98	219.03	220.94	6.5883	6.58208	6.51403	0.4	2.24	0	0.64	0.4		2.88	Hodell et al., 2001	C.mundulus
162-982A-21H-7-W 27	197.98	219.03	220.94	6.5883	6.58208	6.51403	0.7	2.15	0	0.64	0.7	0.7	2.79	Hodell et al., 2001	C.wuellerstorfi
162-982C-22H-5-W 77	200.58	219.46	220.97	6.58904	6.58287	6.52776	0.34	2.17	0	0.64	0.34		2.81	Hodell et al., 2001	C.mundulus
162-982C-22H-5-W 77	200.58	219.46	220.97	6.58904	6.58287	6.52776	0.39	2.24	0	0.64	0.39	0.39	2.88	Hodell et al., 2001	C.wuellerstorfi
162-982C-22H-5-W 87	200.68	219.56	221.07	6.59151	6.58552	6.53095	0.71	2.08	0	0.64	0.71		2.72	Hodell et al., 2001	C.mundulus
162-982C-22H-5-W 87	200.68	219.56	221.07	6.59151	6.58552	6.53095	0.7	2.07	0	0.64	0.7	0.7	2.71	Hodell et al., 2001	C.wuellerstorfi
162-982C-22H-5-W 97	200.78	219.66	221.17	6.59398	6.58816	6.53414	0.6	2.03	0	0.64	0.6		2.67	Hodell et al., 2001	C.mundulus
162-982C-22H-5-W 97	200.78	219.66	221.17	6.59398	6.58816	6.53414	0.75	2.05	0	0.64	0.75	0.75	2.69	Hodell et al., 2001	C.wuellerstorfi
162-982C-22H-5-W 107	200.88	219.76	221.27	6.59645	6.59081	6.53733	0.34	2.18	0	0.64	0.34		2.82	Hodell et al., 2001	C.mundulus
162-982C-22H-5-W 107	200.88	219.76	221.27	6.59645	6.59081	6.53733	0.86	2.18	0	0.64	0.86	0.86	2.82	Hodell et al., 2001	C.wuellerstorfi
162-982C-22H-5-W 117	200.98	219.86	221.37	6.59892	6.59345	6.54052	0.61	2.04	0	0.64	0.61	0.61	2.68	Hodell et al., 2001	C.wuellerstorfi
162-982C-22H-5-W 117	200.98	219.86	221.37	6.59892	6.59345	6.54052	0.51	2.22	0	0.64	0.51		2.86	Hodell et al., 2001	C.mundulus
162-982C-22H-5-W 127	201.08	219.96	221.47	6.60139	6.5961	6.54372	0.42	2.39	0	0.64	0.42		3.03	Hodell et al., 2001	C.mundulus
162-982C-22H-5-W 137	201.18	220.06	221.57	6.60386	6.59875	6.54691	0.82	2.21	0	0.64	0.82	0.82	2.85	Hodell et al., 2001	C.wuellerstorfi
162-982C-22H-5-W 146	201.27	220.15	221.66	6.60608	6.60113	6.54978	0.43	2.24	0	0.64	0.43		2.88	Hodell et al., 2001	C.mundulus
162-982C-22H-5-W 146	201.27	220.15	221.66	6.60608	6.60113	6.54978	0.83	2.21	0	0.64	0.83	0.83	2.85	Hodell et al., 2001	C.wuellerstorfi
162-982C-22H-6-W 7	201.38	220.26	221.77	6.6088	6.60404	6.55329	0.56	2.23	0	0.64	0.56		2.87	Hodell et al., 2001	C.mundulus
162-982C-22H-6-W 7	201.38	220.26	221.77	6.6088	6.60404	6.55329	0.7	2.14	0	0.64	0.7	0.7	2.78	Hodell et al., 2001	C.wuellerstorfi
162-982C-22H-6-W 17	201.48	220.36	221.87	6.61127	6.60668	6.55648	0.55	2.12	0	0.64	0.55		2.76	Hodell et al., 2001	C.mundulus
162-982C-22H-6-W 17	201.48	220.36	221.87	6.61127	6.60668	6.55648	0.54	2.11	0	0.64	0.54	0.54	2.75	Hodell et al., 2001	C.wuellerstorfi
162-982C-22H-6-W 27	201.58	220.46	221.97	6.61374	6.60933	6.55968	0.54	2.21	0	0.64	0.54		2.85	Hodell et al., 2001	C.mundulus
162-982C-22H-6-W 27	201.58	220.46	221.97	6.61374	6.60933	6.55968	0.77	2.18	0	0.64	0.77	0.77	2.82	Hodell et al., 2001	C.wuellerstorfi
162-982C-22H-6-W 37	201.68	220.56	222.07	6.61621	6.61197	6.56287	0.63	2.27	0	0.64	0.63		2.91	Hodell et al., 2001	C.mundulus
162-982C-22H-6-W 37	201.68	220.56	222.07	6.61621	6.61197	6.56287	0.39	2.15	0	0.64	0.39	0.39	2.79	Hodell et al., 2001	C.wuellerstorfi
162-982C-22H-6-W 47	201.78	220.66	222.17	6.61868	6.61462	6.56606	0.52	2.29	0	0.64	0.52		2.93	Hodell et al., 2001	C.mundulus
162-982C-22H-6-W 47	201.78	220.66	222.17	6.61868	6.61462	6.56606	0.61	2.17	0	0.64	0.61	0.61	2.81	Hodell et al., 2001	C.wuellerstorfi
162-982C-22H-6-W 57	201.88	220.76	222.27	6.62115	6.61727	6.56925	0.71	2.18	0	0.64	0.71	0.71	2.82	Hodell et al., 2001	C.wuellerstorfi
162-982C-22H-6-W 67	201.98	220.86	222.37	6.62363	6.61991	6.57244	0.67	2.2	0	0.64	0.67		2.84	Hodell et al., 2001	C.mundulus
162-982C-22H-6-W 67	201.98	220.86	222.37	6.62363	6.61991	6.57244	0.51	2.15	0	0.64	0.51	0.51	2.79	Hodell et al., 2001	C.wuellerstorfi
162-982C-22H-6-W 77	202.08	220.96	222.47	6.6261	6.62256	6.57564	0.81	2.17	0	0.64	0.81		2.81	Hodell et al., 2001	C.mundulus
162-982C-22H-6-W 77	202.08	220.96	222.47	6.6261	6.62256	6.57564	0.75	2.15	0	0.64	0.75	0.75	2.79	Hodell et al., 2001	C.wuellerstorfi
162-982C-22H-6-W 87	202.18	221.06	222.57	6.62857	6.6252	6.57883	0.68	2.2	0	0.64	0.68		2.84	Hodell et al., 2001	C.mundulus
162-982C-22H-6-W 87	202.18	221.06	222.57	6.62857	6.6252	6.57883	0.81	2.17	0	0.64	0.81	0.81	2.81	Hodell et al., 2001	C.wuellerstorfi
162-982A-22H-1-W 97	199.18	221.11	222.69	6.63153	6.62838	6.58042	0.73	2.23	0	0.64	0.73		2.87	Hodell et al., 2001	C.mundulus
162-982A-22H-1-W 97	199.18	221.11	222.69	6.63153	6.62838	6.58042	0.83	2.09	0	0.64	0.83	0.83	2.73	Hodell et al., 2001	C.wuellerstorfi
162-982A-22H-1-W 107	199.28	221.21	222.79	6.634	6.63102	6.58362	0.81	2.21	0	0.64	0.81		2.85	Hodell et al., 2001	C.mundulus
162-982A-22H-1-W 107	199.28	221.21	222.79	6.634	6.63102	6.58362	0.8	2.18	0	0.64	0.8	0.8	2.82	Hodell et al., 2001	C.wuellerstorfi
162-982A-22H-1-W 117	199.38	221.31	222.89	6.63647	6.63367	6.58681	0.75	2.15	0	0.64	0.75		2.79	Hodell et al., 2001	C.mundulus
162-982A-22H-1-W 117	199.38	221.31	222.89	6.63647	6.63367	6.58681	0.71	2.07	0	0.64	0.71	0.71	2.71	Hodell et al., 2001	C.wuellerstorfi
162-982A-22H-1-W 127	199.48	221.41	222.99	6.63894	6.63631	6.59	0.66	2.08	0	0.64	0.66		2.72	Hodell et al., 2001	C.mundulus
162-982A-22H-1-W 127	199.48	221.41	222.99	6.63894	6.63631	6.59	0.63	2.08	0	0.64	0.63	0.63	2.72	Hodell et al., 2001	C.wuellerstorfi
162-982A-22H-1-W 137	199.58	221.51	223.09	6.64141	6.63896	6.593	0.36	2.21	0	0.64	0.36		2.85	Hodell et al., 2001	C.mundulus
162-982A-22H-1-W 137	199.58	221.51	223.09	6.64141	6.63896	6.593	0.38	2.13	0	0.64	0.38	0.38	2.77	Hodell et al., 2001	C.wuellerstorfi
162-982A-22H-1-W 147	199.68	221.61	223.19	6.64388	6.64161	6.596	0.36	2.26	0	0.64	0.36		2.9	Hodell et al., 2001	C.mundulus
162-982A-22H-1-W 147	199.68	221.61	223.19	6.64388	6.64161	6.596	0.57	2.13	0	0.64	0.57	0.57	2.77	Hodell et al., 2001	C.wuellerstorfi
162-982A-22H-2-W 7	199.78	221.71	223.29	6.64635	6.64425	6.599	0	2.28	0	0.64	0		2.92	Hodell et al., 2001	C.mundulus
162-982A-22H-2-W 7	199.78	221.71	223.29	6.64635	6.64425	6.599	0.52	2.21	0	0.64	0.52	0.52	2.85	Hodell et al., 2001	C.wuellerstorfi
162-982A-22H-2-W 17	199.88	221.81	223.39	6.64882	6.6469	6.602	0.07	2.25	0	0.64	0.07		2.89	Hodell et al., 2001	C.mundulus
162-982A-22H-2-W 17	199.88	221.81	223.39	6.64882	6.6469	6.602	0.42	2.25	0	0.64	0.42	0.42	2.89	Hodell et al., 2001	C.wuellerstorfi
162-982A-22H-2-W 27	199.98	221.91	223.49	6.6513	6.64954	6.605	0.07	2.22	0	0.64	0.07		2.86	Hodell et al., 2001	C.mundulus
162-982A-22H-2-W 27	199.98	221.91	223.49	6.6513	6.64954	6.605	0.39	2.21	0	0.64	0.39	0.39	2.85	Hodell et al., 2001	C.wuellerstorfi
162-982A-22H-2-W 37	200.08	222.01	223.59	6.65377	6.65219	6.608	0.14	2.18	0	0.64	0.14		2.82	Hodell et al., 2001	C.mundulus
162-982A-22H-2-W 37	200.08	222.01	223.59	6.65377	6.65219	6.608	0.64	2.21	0	0.64	0.64	0.64	2.85	Hodell et al., 2001	C.wuellerstorfi
162-982A-22H-2-W 47	200.18	222.11	223.69	6.65624	6.65483	6.611	0.32	2.14	0	0.64	0.32		2.78	Hodell et al., 2001	C.mundulus
162-982A-22H-2-W 47	200.18	222.11	223.69	6.65624	6.65483	6.611	0.57	2.12	0	0.64	0.57	0.57	2.76	Hodell et al., 2001	C.wuellerstorfi
162-982A-22H-2-W 57	200.28	222.21	223.79	6.65871	6.65748	6.614	0.43	2.26	0	0.64	0.43		2.9	Hodell et al., 2001	C.mundulus
162-982A-22H-2-W 67	200.38	222.31	223.89	6.66118	6.66013	6.617	0.52	2.07	0	0.64	0.52		2.71	Hodell et al., 2001	C.mundulus
162-982A-22H-2-W 67	200.38	222.31	223.89	6.66118	6.66013	6.617	0.46	2.18	0	0.64	0.46	0.46	2.82	Hodell et al., 2001	C.wuellerstorfi
162-982A-22H-2-W 77	200.48	222.41	223.99	6.66365	6.66277	6.62	0.22	2.14	0	0.64	0.22		2.78	Hodell et al., 2001	C.mundulus
162-982A-22H-2-W 77	200.48	222.41	223.99	6.66365	6.66277	6.62	0.49	2.11	0	0.64	0.49	0.49	2.75	Hodell et al., 2001	C.wuellerstorfi
162-982A-22H-2-W 87	200.58	222.51	224.09	6.66612	6.66542	6.623	0.2	2.17	0	0.64	0.2		2.81	Hodell et al., 2001	C.mundulus
162-982A-22H-2-W 87	200.58	222.51	224.09	6.66612	6.66542	6.623	0.53	2.22	0	0.64	0.53	0.53	2.86	Hodell et al., 2001	C.wuellerstorfi
162-982A-22H-2-W 97	200.68	222.61	224.19	6.66859	6.66806	6.626	0.33	2.04	0	0.64	0.33		2.68	Hodell et al., 2001	C.mundulus
162-982A-22H-2-W 97	200.68	222.61	224.19	6.66859	6.66806	6.626	0.67	2.08	0	0.64	0.67	0.67	2.72	Hodell et al., 2001	C.wuellerstorfi
162-982A-22H-2-W 107	200.78	222.71	224.29	6.67106	6.67071	6.629	0.55	2.03	0	0.64	0.55	0.55	2.67	Hodell et al., 2001	C.wuellerstorfi
162-982A-22H-2-W 117	200.88	222.81	224.39	6.67353	6.67335	6.632	0.57	2.02	0	0.64	0.57		2.66	Hodell et al., 2001	C.mundulus
162-982A-22H-2-W 117	200.88	222.81	224.39	6.67353	6.67335	6.632	0.7	2.13	0	0.64	0.7	0.7	2.77	Hodell et al., 2001	C.wuellerstorfi
162-982A-22H-2-W 127	200.98	222.91	224.49	6.676	6.676	6.635	0.31	1.95	0	0.64	0.31		2.59	Hodell et al., 2001	C.mundulus
162-982A-22H-2-W 127	200.98	222.91	224.49	6.676	6.676	6.635	0.61	1.97	0	0.64	0.61	0.61	2.61	Hodell et al., 2001	C.wuellerstorfi
162-982A-22H-2-W 144	201.15	223.08	224.66	6.6795	6.68092	6.63917	0.24	2.27	0	0.64	0.24		2.91	Hodell et al., 2001	C.mundulus
162-982A-22H-2-W 144	201.15	223.08	224.66	6.6795	6.68092	6.63917	0.42	1.96	0	0.64	0.42	0.42	2.6	Hodell et al., 2001	C.wuellerstorfi
162-982A-22H-3-W 7	201.28	223.21	224.79	6.68218	6.68469	6.64235	0.23	2.14	0	0.64	0.23		2.78	Hodell et al., 2001	C.mundulus
162-982A-22H-3-W 7	201.28	223.21	224.79	6.68218	6.68469	6.64235	0.45	2.2	0	0.64	0.45	0.45	2.84	Hodell et al., 2001	C.wuellerstorfi
162-982A-22H-3-W 17	201.38	223.31	224.89	6.68425	6.68759	6.6448	0.36	2.27	0	0.64	0.36		2.91	Hodell et al., 2001	C.mundulus
162-982A-22H-3-W 17	201.38	223.31	224.89	6.68425	6.68759	6.6448	0.56	2.3	0	0.64	0.56	0.56	2.94	Hodell et al., 2001	C.wuellerstorfi
162-982A-22H-3-W 27	201.48	223.41	224.99	6.68631	6.69048	6.64725	-0.07	2.33	0	0.64	-0.07		2.97	Hodell et al., 2001	C.mundulus
162-982A-22H-3-W 27	201.48	223.41	224.99	6.68631	6.69048	6.64725	0.28	2.29	0	0.64	0.28	0.28	2.93	Hodell et al., 2001	C.wuellerstorfi
162-982A-22H-3-W 37	201.58	223.51	225.09	6.68837	6.69338	6.64971	0.26	2.29	0	0.64	0.26		2.93	Hodell et al., 2001	C.mundulus
162-982A-22H-3-W 37	201.58	223.51	225.09	6.68837	6.69338	6.64971	0.15	2.23	0	0.64	0.15	0.15	2.87	Hodell et al., 2001	C.wuellerstorfi
162-982A-22H-3-W 47	201.68	223.61	225.19	6.69043	6.69628	6.65216	0.36	2.43	0	0.64	0.36	0.36	3.07	Hodell et al., 2001	C.wuellerstorfi
162-982A-22H-3-W 57	201.78	223.71	225.29	6.69249	6.69917	6.65461	0.61	2.23	0	0.64	0.61		2.87	Hodell et al., 2001	C.mundulus
162-982A-22H-3-W 57	201.78	223.71	225.29	6.69249	6.69917	6.65461	0.41	2.08	0	0.64	0.41	0.41	2.72	Hodell et al., 2001	C.wuellerstorfi
162-982A-22H-3-W 67	201.88	223.81	225.39	6.69455	6.70207	6.65706	0.46	2.17	0	0.64	0.46	0.46	2.81	Hodell et al., 2001	C.wuellerstorfi
162-982A-22H-3-W 67	201.88	223.81	225.39	6.69455	6.70207	6.65706	0.56	2.28	0	0.64	0.56		2.92	Hodell et al., 2001	C.mundulus
162-982A-22H-3-W 77	201.98	223.91	225.49	6.69661	6.70497	6.65951	0.67	2.1	0	0.64	0.67	0.67	2.74	Hodell et al., 2001	C.wuellerstorfi
162-982A-22H-3-W 77	201.98	223.91	225.49	6.69661	6.70497	6.65951	0.23	2.27	0	0.64	0.23		2.91	Hodell et al., 2001	C.mundulus
162-982A-22H-3-W 87	202.08	224.01	225.59	6.69867	6.70786	6.66196	0.64	2.2	0	0.64	0.64	0.64	2.84	Hodell et al., 2001	C.wuellerstorfi
162-982A-22H-3-W 87	202.08	224.01	225.59	6.69867	6.70786	6.66196	0.44	2.28	0	0.64	0.44		2.92	Hodell et al., 2001	C.mundulus
162-982A-22H-3-W 97	202.18	224.11	225.69	6.70074	6.71076	6.66441	0.57	2.06	0	0.64	0.57	0.57	2.7	Hodell et al., 2001	C.wuellerstorfi
162-982A-22H-3-W 97	202.18	224.11	225.69	6.70074	6.71076	6.66441	0.32	2.11	0	0.64	0.32		2.75	Hodell et al., 2001	C.mundulus
162-982A-22H-3-W 107	202.28	224.21	225.79	6.7028	6.71365	6.66686	0.47	2.05	0	0.64	0.47	0.47	2.69	Hodell et al., 2001	C.wuellerstorfi
162-982A-22H-3-W 107	202.28	224.21	225.79	6.7028	6.71365	6.66686	0.53	2.1	0	0.64	0.53		2.74	Hodell et al., 2001	C.mundulus
162-982A-22H-3-W 117	202.38	224.31	225.89	6.70486	6.71655	6.66931	0.49	2.16	0	0.64	0.49	0.49	2.8	Hodell et al., 2001	C.wuellerstorfi
162-982A-22H-3-W 117	202.38	224.31	225.89	6.70486	6.71655	6.66931	0.32	2.24	0	0.64	0.32		2.88	Hodell et al., 2001	C.mundulus
162-982A-22H-3-W 127	202.48	224.41	225.99	6.70692	6.71945	6.67176	0.66	2.29	0	0.64	0.66	0.66	2.93	Hodell et al., 2001	C.wuellerstorfi
162-982A-22H-3-W 127	202.48	224.41	225.99	6.70692	6.71945	6.67176	0.42	2.34	0	0.64	0.42		2.98	Hodell et al., 2001	C.mundulus
162-982A-22H-3-W 137	202.58	224.51	226.09	6.70898	6.72234	6.67422	0.71	2.24	0	0.64	0.71	0.71	2.88	Hodell et al., 2001	C.wuellerstorfi
162-982A-22H-3-W 137	202.58	224.51	226.09	6.70898	6.72234	6.67422	0.64	2.29	0	0.64	0.64		2.93	Hodell et al., 2001	C.mundulus
162-982A-22H-3-W 147	202.68	224.61	226.19	6.71104	6.72524	6.67667	0.82	2.13	0	0.64	0.82	0.82	2.77	Hodell et al., 2001	C.wuellerstorfi
162-982A-22H-4-W 7	202.78	224.71	226.29	6.7131	6.72814	6.67912	0.8	2.2	0	0.64	0.8	0.8	2.84	Hodell et al., 2001	C.wuellerstorfi
162-982A-22H-4-W 7	202.78	224.71	226.29	6.7131	6.72814	6.67912	0.4	2.17	0	0.64	0.4		2.81	Hodell et al., 2001	C.mundulus
162-982A-22H-4-W 27	202.98	224.91	226.49	6.71723	6.73393	6.68402	0.7	2.18	0	0.64	0.7	0.7	2.82	Hodell et al., 2001	C.wuellerstorfi
162-982A-22H-4-W 27	202.98	224.91	226.49	6.71723	6.73393	6.68402	0.66	2.2	0	0.64	0.66		2.84	Hodell et al., 2001	C.mundulus
162-982A-22H-4-W 37	203.08	225.01	226.59	6.71929	6.73683	6.68647	0.73	2.19	0	0.64	0.73	0.73	2.83	Hodell et al., 2001	C.wuellerstorfi
162-982A-22H-4-W 37	203.08	225.01	226.59	6.71929	6.73683	6.68647	0.43	2.26	0	0.64	0.43		2.9	Hodell et al., 2001	C.mundulus
162-982A-22H-4-W 47	203.18	225.11	226.69	6.72135	6.73972	6.68892	0.74	2.21	0	0.64	0.74	0.74	2.85	Hodell et al., 2001	C.wuellerstorfi
162-982A-22H-4-W 57	203.28	225.21	226.79	6.72341	6.74262	6.69137	0.74	2.21	0	0.64	0.74	0.74	2.85	Hodell et al., 2001	C.wuellerstorfi
162-982A-22H-4-W 57	203.28	225.21	226.79	6.72341	6.74262	6.69137	0.54	2.28	0	0.64	0.54		2.92	Hodell et al., 2001	C.mundulus
162-982A-22H-4-W 67	203.38	225.31	226.89	6.72547	6.74552	6.69382	0.62	2.14	0	0.64	0.62	0.62	2.78	Hodell et al., 2001	C.wuellerstorfi
162-982A-22H-4-W 67	203.38	225.31	226.89	6.72547	6.74552	6.69382	0.53	2.17	0	0.64	0.53		2.81	Hodell et al., 2001	C.mundulus
162-982A-22H-4-W 77	203.48	225.41	226.99	6.72753	6.74841	6.69627	0.76	2.19	0	0.64	0.76	0.76	2.83	Hodell et al., 2001	C.wuellerstorfi
162-982A-22H-4-W 77	203.48	225.41	226.99	6.72753	6.74841	6.69627	0.49	2.24	0	0.64	0.49		2.88	Hodell et al., 2001	C.mundulus
162-982A-22H-4-W 87	203.58	225.51	227.09	6.7296	6.75131	6.69873	0.83	2.15	0	0.64	0.83	0.83	2.79	Hodell et al., 2001	C.wuellerstorfi
162-982A-22H-4-W 87	203.58	225.51	227.09	6.7296	6.75131	6.69873	0.49	2.21	0	0.64	0.49		2.85	Hodell et al., 2001	C.mundulus
162-982A-22H-4-W 97	203.68	225.61	227.19	6.73166	6.75421	6.70118	0.76	2.15	0	0.64	0.76	0.76	2.79	Hodell et al., 2001	C.wuellerstorfi
162-982A-22H-4-W 97	203.68	225.61	227.19	6.73166	6.75421	6.70118	0.58	2.09	0	0.64	0.58		2.73	Hodell et al., 2001	C.mundulus
162-982A-22H-4-W 107	203.78	225.71	227.29	6.73372	6.7571	6.70363	0.91	2.07	0	0.64	0.91	0.91	2.71	Hodell et al., 2001	C.wuellerstorfi
162-982A-22H-4-W 107	203.78	225.71	227.29	6.73372	6.7571	6.70363	0.54	2.12	0	0.64	0.54		2.76	Hodell et al., 2001	C.mundulus
162-982A-22H-4-W 117	203.88	225.81	227.39	6.73578	6.76	6.70608	0.89	2.03	0	0.64	0.89	0.89	2.67	Hodell et al., 2001	C.wuellerstorfi
162-982A-22H-4-W 117	203.88	225.81	227.39	6.73578	6.76	6.70608	0.64	2.08	0	0.64	0.64		2.72	Hodell et al., 2001	C.mundulus
162-982A-22H-4-W 127	203.98	225.91	227.49	6.73784	6.76145	6.70853	0.93	2.02	0	0.64	0.93	0.93	2.66	Hodell et al., 2001	C.wuellerstorfi
162-982A-22H-4-W 127	203.98	225.91	227.49	6.73784	6.76145	6.70853	0.71	2.16	0	0.64	0.71		2.8	Hodell et al., 2001	C.mundulus
162-982A-22H-4-W 137	204.08	226.01	227.59	6.7399	6.76291	6.71098	0.84	1.99	0	0.64	0.84	0.84	2.63	Hodell et al., 2001	C.wuellerstorfi
162-982A-22H-4-W 137	204.08	226.01	227.59	6.7399	6.76291	6.71098	0.65	2.13	0	0.64	0.65		2.77	Hodell et al., 2001	C.mundulus
162-982A-22H-4-W 146	204.17	226.1	227.68	6.74176	6.76422	6.71319	0.79	2.09	0	0.64	0.79	0.79	2.73	Hodell et al., 2001	C.wuellerstorfi
162-982A-22H-4-W 146	204.17	226.1	227.68	6.74176	6.76422	6.71319	0.44	2.17	0	0.64	0.44		2.81	Hodell et al., 2001	C.mundulus
162-982A-22H-5-W 7	204.28	226.21	227.79	6.74402	6.76582	6.71588	0.83	2.16	0	0.64	0.83	0.83	2.8	Hodell et al., 2001	C.wuellerstorfi
162-982A-22H-5-W 7	204.28	226.21	227.79	6.74402	6.76582	6.71588	0.46	2.23	0	0.64	0.46		2.87	Hodell et al., 2001	C.mundulus
162-982A-22H-5-W 17	204.38	226.31	227.89	6.74609	6.76727	6.71833	0.78	2.13	0	0.64	0.78	0.78	2.77	Hodell et al., 2001	C.wuellerstorfi
162-982A-22H-5-W 27	204.48	226.41	227.99	6.74815	6.76873	6.72078	0.76	2.1	0	0.64	0.76	0.76	2.74	Hodell et al., 2001	C.wuellerstorfi
162-982A-22H-5-W 37	204.58	226.51	228.09	6.75021	6.77018	6.72324	0.69	2.18	0	0.64	0.69	0.69	2.82	Hodell et al., 2001	C.wuellerstorfi
162-982A-22H-5-W 37	204.58	226.51	228.09	6.75021	6.77018	6.72324	0.45	2.25	0	0.64	0.45		2.89	Hodell et al., 2001	C.mundulus
162-982A-22H-5-W 47	204.68	226.61	228.19	6.75227	6.77164	6.72569	0.56	2.02	0	0.64	0.56	0.56	2.66	Hodell et al., 2001	C.wuellerstorfi
162-982A-22H-5-W 47	204.68	226.61	228.19	6.75227	6.77164	6.72569	0.2	2.2	0	0.64	0.2		2.84	Hodell et al., 2001	C.mundulus
162-982A-22H-5-W 57	204.78	226.71	228.29	6.75433	6.77309	6.72814	0.48	2.01	0	0.64	0.48	0.48	2.65	Hodell et al., 2001	C.wuellerstorfi
162-982A-22H-5-W 67	204.88	226.81	228.39	6.75639	6.77455	6.73059	0.5	2.14	0	0.64	0.5	0.5	2.78	Hodell et al., 2001	C.wuellerstorfi
162-982A-22H-5-W 77	204.98	226.91	228.49	6.75845	6.776	6.73304	0.6	2.12	0	0.64	0.6	0.6	2.76	Hodell et al., 2001	C.wuellerstorfi
162-982A-22H-5-W 77	204.98	226.91	228.49	6.75845	6.776	6.73304	0.46	2.48	0	0.64	0.46		3.12	Hodell et al., 2001	C.mundulus
162-982A-22H-5-W 87	205.08	227.01	228.59	6.76052	6.77745	6.73549	0.51	2.22	0	0.64	0.51	0.51	2.86	Hodell et al., 2001	C.wuellerstorfi
162-982A-22H-5-W 97	205.18	227.11	228.69	6.76258	6.77891	6.73794	0.48	2.1	0	0.64	0.48	0.48	2.74	Hodell et al., 2001	C.wuellerstorfi
162-982A-22H-5-W 107	205.28	227.21	228.79	6.76464	6.78036	6.74039	0.68	2.21	0	0.64	0.68	0.68	2.85	Hodell et al., 2001	C.wuellerstorfi
162-982A-22H-5-W 107	205.28	227.21	228.79	6.76464	6.78036	6.74039	0.71	2.11	0	0.64	0.71		2.75	Hodell et al., 2001	C.mundulus
162-982A-22H-5-W 117	205.38	227.31	228.89	6.7667	6.78182	6.74284	0.58	2.1	0	0.64	0.58	0.58	2.74	Hodell et al., 2001	C.wuellerstorfi
162-982A-22H-5-W 127	205.48	227.41	228.99	6.76876	6.78327	6.74529	0.79	2.08	0	0.64	0.79	0.79	2.72	Hodell et al., 2001	C.wuellerstorfi
162-982A-22H-5-W 127	205.48	227.41	228.99	6.76876	6.78327	6.74529	0.42	2.19	0	0.64	0.42		2.83	Hodell et al., 2001	C.mundulus
162-982A-22H-5-W 137	205.58	227.51	229.09	6.77082	6.78473	6.74775	0.77	2.03	0	0.64	0.77	0.77	2.67	Hodell et al., 2001	C.wuellerstorfi
162-982A-22H-5-W 137	205.58	227.51	229.09	6.77082	6.78473	6.74775	0.34	2.11	0	0.64	0.34		2.75	Hodell et al., 2001	C.mundulus
162-982A-22H-5-W 147	205.68	227.61	229.19	6.77288	6.78618	6.7502	0.81	2.06	0	0.64	0.81	0.81	2.7	Hodell et al., 2001	C.wuellerstorfi
162-982A-22H-5-W 147	205.68	227.61	229.19	6.77288	6.78618	6.7502	0.7	2.08	0	0.64	0.7		2.72	Hodell et al., 2001	C.mundulus
162-982A-22H-6-W 7	205.78	227.71	229.29	6.77494	6.78764	6.75265	0.81	2.04	0	0.64	0.81	0.81	2.68	Hodell et al., 2001	C.wuellerstorfi
162-982A-22H-6-W 7	205.78	227.71	229.29	6.77494	6.78764	6.75265	0.61	2.06	0	0.64	0.61		2.7	Hodell et al., 2001	C.mundulus
162-982A-22H-6-W 17	205.88	227.81	229.39	6.77701	6.78909	6.7551	0.81	1.91	0	0.64	0.81	0.81	2.55	Hodell et al., 2001	C.wuellerstorfi
162-982A-22H-6-W 17	205.88	227.81	229.39	6.77701	6.78909	6.7551	0.38	1.98	0	0.64	0.38		2.62	Hodell et al., 2001	C.mundulus
162-982A-22H-6-W 27	205.98	227.91	229.49	6.77907	6.79055	6.75755	0.85	2.03	0	0.64	0.85	0.85	2.67	Hodell et al., 2001	C.wuellerstorfi
162-982A-22H-6-W 27	205.98	227.91	229.49	6.77907	6.79055	6.75755	0.47	1.97	0	0.64	0.47		2.61	Hodell et al., 2001	C.mundulus
162-982A-22H-6-W 37	206.08	228.01	229.59	6.78113	6.792	6.76	0.75	1.88	0	0.64	0.75	0.75	2.52	Hodell et al., 2001	C.wuellerstorfi
162-982A-22H-6-W 47	206.18	228.11	229.69	6.78319	6.7937	6.76237	0.81	1.95	0	0.64	0.81	0.81	2.59	Hodell et al., 2001	C.wuellerstorfi
162-982A-22H-6-W 47	206.18	228.11	229.69	6.78319	6.7937	6.76237	0.59	2.05	0	0.64	0.59		2.69	Hodell et al., 2001	C.mundulus
162-982A-22H-6-W 57	206.28	228.21	229.79	6.78525	6.79541	6.76474	0.78	2.04	0	0.64	0.78	0.78	2.68	Hodell et al., 2001	C.wuellerstorfi
162-982A-22H-6-W 77	206.48	228.41	229.99	6.78937	6.79882	6.76947	0.86	2.13	0	0.64	0.86	0.86	2.77	Hodell et al., 2001	C.wuellerstorfi
162-982B-23H-3-W 7	208.08	228.5	230.04	6.7904	6.79967	6.77161	0.86	2.11	0	0.64	0.86	0.86	2.75	Hodell et al., 2001	C.wuellerstorfi
162-982B-23H-3-W 17	208.18	228.6	230.14	6.79247	6.80138	6.77397	0.79	2.16	0	0.64	0.79	0.79	2.8	Hodell et al., 2001	C.wuellerstorfi
162-982B-23H-3-W 27	208.28	228.7	230.24	6.79453	6.80308	6.77634	0.81	2.21	0	0.64	0.81		2.85	Hodell et al., 2001	C.mundulus
162-982B-23H-3-W 27	208.28	228.7	230.24	6.79453	6.80308	6.77634	0.41	2.16	0	0.64	0.41	0.41	2.8	Hodell et al., 2001	C.wuellerstorfi
162-982B-23H-3-W 37	208.38	228.8	230.34	6.79659	6.80479	6.77871	1.04	2.29	0	0.64	1.04	1.04	2.93	Hodell et al., 2001	C.wuellerstorfi
162-982B-23H-3-W 47	208.48	228.9	230.44	6.79865	6.80649	6.78108	0.86	2.15	0	0.64	0.86	0.86	2.79	Hodell et al., 2001	C.wuellerstorfi
162-982B-23H-3-W 57	208.58	229	230.54	6.80071	6.8082	6.78345	0.68	2.05	0	0.64	0.68	0.68	2.69	Hodell et al., 2001	C.wuellerstorfi
162-982B-23H-3-W 57	208.58	229	230.54	6.80071	6.8082	6.78345	0.65	2.22	0	0.64	0.65		2.86	Hodell et al., 2001	C.mundulus
162-982B-23H-3-W 67	208.68	229.1	230.64	6.80277	6.8099	6.78582	0.78	2.07	0	0.64	0.78	0.78	2.71	Hodell et al., 2001	C.wuellerstorfi
162-982B-23H-3-W 77	208.78	229.2	230.74	6.80483	6.81161	6.78818	0.81	2.06	0	0.64	0.81	0.81	2.7	Hodell et al., 2001	C.wuellerstorfi
162-982B-23H-3-W 77	208.78	229.2	230.74	6.80483	6.81161	6.78818	0.67	2.17	0	0.64	0.67		2.81	Hodell et al., 2001	C.mundulus
162-982B-23H-3-W 87	208.88	229.3	230.84	6.8069	6.81331	6.79055	0.64	2.16	0	0.64	0.64	0.64	2.8	Hodell et al., 2001	C.wuellerstorfi
162-982B-23H-3-W 87	208.88	229.3	230.84	6.8069	6.81331	6.79055	0.56	2.32	0	0.64	0.56		2.96	Hodell et al., 2001	C.mundulus
162-982B-23H-3-W 97	208.98	229.4	230.94	6.80896	6.81502	6.79292	0.85	2.22	0	0.64	0.85	0.85	2.86	Hodell et al., 2001	C.wuellerstorfi
162-982B-23H-3-W 97	208.98	229.4	230.94	6.80896	6.81502	6.79292	0.08	2.18	0	0.64	0.08		2.82	Hodell et al., 2001	C.mundulus
162-982B-23H-3-W 107	209.08	229.5	231.04	6.81102	6.81672	6.79529	0.69	2.15	0	0.64	0.69	0.69	2.79	Hodell et al., 2001	C.wuellerstorfi
162-982B-23H-3-W 107	209.08	229.5	231.04	6.81102	6.81672	6.79529	0.35	2.2	0	0.64	0.35		2.84	Hodell et al., 2001	C.mundulus
162-982B-23H-3-W 117	209.18	229.6	231.14	6.81308	6.81843	6.79766	0.75	2.16	0	0.64	0.75	0.75	2.8	Hodell et al., 2001	C.wuellerstorfi
162-982B-23H-3-W 127	209.28	229.7	231.24	6.81514	6.82013	6.80003	0.82	2.21	0	0.64	0.82	0.82	2.85	Hodell et al., 2001	C.wuellerstorfi
162-982B-23H-3-W 127	209.28	229.7	231.24	6.81514	6.82013	6.80003	0.75	2.23	0	0.64	0.75		2.87	Hodell et al., 2001	C.mundulus
162-982B-23H-3-W 137	209.38	229.8	231.34	6.8172	6.82184	6.80239	0.83	2.08	0	0.64	0.83	0.83	2.72	Hodell et al., 2001	C.wuellerstorfi
162-982B-23H-3-W 137	209.38	229.8	231.34	6.8172	6.82184	6.80239	0.83	2.22	0	0.64	0.83		2.86	Hodell et al., 2001	C.mundulus
162-982B-23H-3-W 147	209.48	229.9	231.44	6.81926	6.82354	6.80476	1.03	2.09	0	0.64	1.03	1.03	2.73	Hodell et al., 2001	C.wuellerstorfi
162-982B-23H-4-W 7	209.58	230	231.54	6.82132	6.82525	6.80713	0.74	1.92	0	0.64	0.74		2.56	Hodell et al., 2001	C.mundulus
162-982B-23H-4-W 17	209.68	230.1	231.64	6.82339	6.82695	6.8095	0.74	2.19	0	0.64	0.74	0.74	2.83	Hodell et al., 2001	C.wuellerstorfi
162-982B-23H-4-W 27	209.78	230.2	231.74	6.82545	6.82866	6.81187	0.86	2.06	0	0.64	0.86	0.86	2.7	Hodell et al., 2001	C.wuellerstorfi
162-982B-23H-4-W 37	209.88	230.3	231.84	6.82751	6.83036	6.81424	0.89	2.07	0	0.64	0.89	0.89	2.71	Hodell et al., 2001	C.wuellerstorfi
162-982B-23H-4-W 37	209.88	230.3	231.84	6.82751	6.83036	6.81424	0.76	2.13	0	0.64	0.76		2.77	Hodell et al., 2001	C.mundulus
162-982B-23H-4-W 47	209.98	230.4	231.94	6.82957	6.83207	6.81661	1.01	2.17	0	0.64	1.01	1.01	2.81	Hodell et al., 2001	C.wuellerstorfi
162-982B-23H-4-W 57	210.08	230.5	232.04	6.83163	6.83377	6.81897	1.11	2.25	0	0.64	1.11	1.11	2.89	Hodell et al., 2001	C.wuellerstorfi
162-982B-23H-4-W 57	210.08	230.5	232.04	6.83163	6.83377	6.81897	0.8	2.09	0	0.64	0.8		2.73	Hodell et al., 2001	C.mundulus
162-982B-23H-4-W 67	210.18	230.6	232.14	6.83369	6.83548	6.82134	0.87	2.05	0	0.64	0.87	0.87	2.69	Hodell et al., 2001	C.wuellerstorfi
162-982B-23H-4-W 67	210.18	230.6	232.14	6.83369	6.83548	6.82134	0.75	2.03	0	0.64	0.75		2.67	Hodell et al., 2001	C.mundulus
162-982B-23H-4-W 87	210.38	230.8	232.34	6.83782	6.83889	6.82608	0.66	1.9	0	0.64	0.66	0.66	2.54	Hodell et al., 2001	C.wuellerstorfi
162-982B-23H-4-W 99	210.49	230.91	232.45	6.84008	6.84076	6.82868	0.84	2.14	0	0.64	0.84	0.84	2.78	New data (this study)	C.wuellerstorfi
162-982B-23H-4-W 107	210.58	231	232.54	6.84194	6.8423	6.83082	0.8	2.12	0	0.64	0.8	0.8	2.76	Hodell et al., 2001	C.wuellerstorfi
162-982B-23H-4-W 117	210.68	231.1	232.64	6.844	6.844	6.83318	0.74	1.98	0	0.64	0.74	0.74	2.62	Hodell et al., 2001	C.wuellerstorfi
162-982B-23H-4-W 147	210.98	231.4	232.94	6.85038	6.84872	6.84029	0.49	1.83	0	0.64	0.49	0.49	2.47	Hodell et al., 2001	C.wuellerstorfi
162-982B-23H-5-W 7	211.08	231.5	233.04	6.8525	6.85029	6.84266	0.72	2.18	0	0.64	0.72	0.72	2.82	Hodell et al., 2001	C.wuellerstorfi
162-982B-23H-5-W 17	211.18	231.6	233.14	6.85463	6.85186	6.84503	0.64	2.14	0	0.64	0.64	0.64	2.78	Hodell et al., 2001	C.wuellerstorfi
162-982B-23H-5-W 27	211.28	231.7	233.24	6.85676	6.85344	6.84739	0.79	2.38	0	0.64	0.79	0.79	3.02	Hodell et al., 2001	C.wuellerstorfi
162-982B-23H-5-W 37	211.37	231.79	233.33	6.85867	6.85485	6.84953	0.7	2.31	0	0.64	0.7	0.7	2.95	New data (this study)	C.wuellerstorfi
162-982B-23H-5-W 49	211.49	231.91	233.45	6.86122	6.85674	6.85237	0.64	2.36	0	0.64	0.64	0.64	3	New data (this study)	C.wuellerstorfi
162-982A-23H-1-W 97	208.68	231.88	233.52	6.86271	6.85784	6.85166	0.57	2.38	0	0.64	0.57	0.57	3.02	Hodell et al., 2001	C.wuellerstorfi
162-982B-23H-5-W 59	211.59	232.01	233.55	6.86335	6.85831	6.85474	0.54	2.38	0	0.64	0.54	0.54	3.02	New data (this study)	C.wuellerstorfi
162-982A-23H-1-W 107	208.78	231.98	233.62	6.86484	6.85941	6.85403	0.48	2.35	0	0.64	0.48	0.48	2.99	Hodell et al., 2001	C.wuellerstorfi
162-982A-23H-1-W 107	208.78	231.98	233.62	6.86484	6.85941	6.85403	0.31	2.33	0	0.64	0.31		2.97	Hodell et al., 2001	C.mundulus
162-982B-23H-5-W 69	211.69	232.11	233.65	6.86547	6.85988	6.85711	0.59	2.39	0	0.64	0.59	0.59	3.03	New data (this study)	C.wuellerstorfi
162-982A-23H-1-W 117	208.88	232.08	233.72	6.86696	6.86098	6.85639	0.62	2.36	0	0.64	0.62	0.62	3	Hodell et al., 2001	C.wuellerstorfi
162-982B-23H-5-W 79	211.79	232.21	233.75	6.8676	6.86146	6.8663	0.28	2.34	0	0.64	0.28	0.28	2.98	New data (this study)	C.wuellerstorfi
162-982B-23H-5-W 79	211.79	232.21	233.75	6.8676	6.86146	6.8663	0.28	2.35	0	0.64	0.28	0.28	2.99	New data (this study)	C.wuellerstorfi
162-982A-23H-1-W 127	208.98	232.18	233.82	6.86909	6.86256	6.85876	0.55	2.35	0	0.64	0.55	0.55	2.99	Hodell et al., 2001	C.wuellerstorfi
162-982A-23H-1-W 137	209.08	232.28	233.92	6.87121	6.86413	6.86744	0.31	2.27	0	0.64	0.31	0.31	2.91	Hodell et al., 2001	C.wuellerstorfi
162-982A-23H-1-W 147	209.18	232.38	234.02	6.87334	6.8657	6.86907	0.95	2.32	0	0.64	0.95	0.95	2.96	Hodell et al., 2001	C.wuellerstorfi
162-982A-23H-2-W 7	209.28	232.48	234.12	6.87547	6.86727	6.8707	1.03	2.25	0	0.64	1.03	1.03	2.89	Hodell et al., 2001	C.wuellerstorfi
162-982A-23H-2-W 17	209.38	232.58	234.22	6.87759	6.86885	6.87233	1.03	2.29	0	0.64	1.03	1.03	2.93	Hodell et al., 2001	C.wuellerstorfi
162-982A-23H-2-W 27	209.48	232.68	234.32	6.87972	6.87042	6.87396	1.07	2.02	0	0.64	1.07	1.07	2.66	Hodell et al., 2001	C.wuellerstorfi
162-982A-23H-2-W 37	209.58	232.78	234.42	6.88185	6.87199	6.87559	0.95	2.12	0	0.64	0.95	0.95	2.76	Hodell et al., 2001	C.wuellerstorfi
162-982A-23H-2-W 37	209.58	232.78	234.42	6.88185	6.87199	6.87559	0.78	2.18	0	0.64	0.78		2.82	Hodell et al., 2001	C.mundulus
162-982A-23H-2-W 47	209.68	232.88	234.52	6.88397	6.87356	6.87722	1.01	2.13	0	0.64	1.01	1.01	2.77	Hodell et al., 2001	C.wuellerstorfi
162-982A-23H-2-W 57	209.78	232.98	234.62	6.8861	6.87514	6.87885	0.98	2.24	0	0.64	0.98	0.98	2.88	Hodell et al., 2001	C.wuellerstorfi
162-982A-23H-2-W 67	209.88	233.08	234.72	6.88822	6.87671	6.88048	0.76	1.91	0	0.64	0.76	0.76	2.55	Hodell et al., 2001	C.wuellerstorfi
162-982A-23H-2-W 77	209.98	233.18	234.82	6.89035	6.87828	6.88211	0.9	2.24	0	0.64	0.9	0.9	2.88	Hodell et al., 2001	C.wuellerstorfi
162-982A-23H-2-W 87	210.08	233.28	234.92	6.89248	6.87985	6.88374	0.56	2.19	0	0.64	0.56	0.56	2.83	Hodell et al., 2001	C.wuellerstorfi
162-982A-23H-2-W 97	210.18	233.38	235.02	6.8946	6.88143	6.88537	0.79	2.22	0	0.64	0.79	0.79	2.86	Hodell et al., 2001	C.wuellerstorfi
162-982A-23H-2-W 107	210.28	233.48	235.12	6.89673	6.883	6.887	0.55	2.04	0	0.64	0.55	0.55	2.68	Hodell et al., 2001	C.wuellerstorfi
162-982A-23H-2-W 117	210.38	233.58	235.22	6.89885	6.88531	6.88864	0.74	2.16	0	0.64	0.74	0.74	2.8	Hodell et al., 2001	C.wuellerstorfi
162-982A-23H-2-W 127	210.48	233.68	235.32	6.90098	6.88763	6.89027	0.84	2.19	0	0.64	0.84	0.84	2.83	Hodell et al., 2001	C.wuellerstorfi
162-982A-23H-2-W 137	210.58	233.78	235.42	6.90311	6.88994	6.8919	0.91	2.28	0	0.64	0.91	0.91	2.92	Hodell et al., 2001	C.wuellerstorfi
162-982A-23H-2-W 147	210.68	233.88	235.52	6.90523	6.89225	6.89353	0.82	2.29	0	0.64	0.82	0.82	2.93	Hodell et al., 2001	C.wuellerstorfi
162-982A-23H-3-W 7	210.78	233.98	235.62	6.90736	6.89456	6.89516	0.77	2.22	0	0.64	0.77	0.77	2.86	Hodell et al., 2001	C.wuellerstorfi
162-982A-23H-3-W 17	210.88	234.08	235.72	6.90949	6.89688	6.89679	0.91	2.27	0	0.64	0.91	0.91	2.91	Hodell et al., 2001	C.wuellerstorfi
162-982A-23H-3-W 27	210.98	234.18	235.82	6.91161	6.89919	6.89842	0.74	2.23	0	0.64	0.74	0.74	2.87	Hodell et al., 2001	C.wuellerstorfi
162-982A-23H-3-W 27	210.98	234.18	235.82	6.91161	6.89919	6.89842	0.82	2.27	0	0.64	0.82		2.91	Hodell et al., 2001	C.mundulus
162-982A-23H-3-W 37	211.08	234.28	235.92	6.91374	6.9015	6.90005	0.81	2.22	0	0.64	0.81	0.81	2.86	Hodell et al., 2001	C.wuellerstorfi
162-982A-23H-3-W 37	211.08	234.28	235.92	6.91374	6.9015	6.90005	0.59	2.29	0	0.64	0.59		2.93	Hodell et al., 2001	C.mundulus
162-982A-23H-3-W 47	211.18	234.38	236.02	6.91586	6.90382	6.90168	0.99	2.24	0	0.64	0.99	0.99	2.88	Hodell et al., 2001	C.wuellerstorfi
162-982A-23H-3-W 57	211.28	234.48	236.12	6.91799	6.90613	6.90331	0.75	2.38	0	0.64	0.75	0.75	3.02	Hodell et al., 2001	C.wuellerstorfi
162-982A-23H-3-W 67	211.38	234.58	236.22	6.92012	6.90844	6.90494	0.99	2.24	0	0.64	0.99	0.99	2.88	Hodell et al., 2001	C.wuellerstorfi
162-982A-23H-3-W 77	211.48	234.68	236.32	6.92224	6.91076	6.90657	0.91	2.13	0	0.64	0.91	0.91	2.77	Hodell et al., 2001	C.wuellerstorfi
162-982A-23H-3-W 87	211.58	234.78	236.42	6.92437	6.91307	6.9082	0.85	2.12	0	0.64	0.85	0.85	2.76	Hodell et al., 2001	C.wuellerstorfi
162-982A-23H-3-W 97	211.68	234.88	236.52	6.92649	6.91538	6.90983	0.92	2.19	0	0.64	0.92	0.92	2.83	Hodell et al., 2001	C.wuellerstorfi
162-982A-23H-3-W 97	211.68	234.88	236.52	6.92649	6.91538	6.90983	0.64	2.15	0	0.64	0.64		2.79	Hodell et al., 2001	C.mundulus
162-982A-23H-3-W 107	211.78	234.98	236.62	6.92862	6.91769	6.91146	0.77	2.27	0	0.64	0.77	0.77	2.91	Hodell et al., 2001	C.wuellerstorfi
162-982A-23H-3-W 117	211.88	235.08	236.72	6.93075	6.92001	6.91309	0.84	2.12	0	0.64	0.84	0.84	2.76	Hodell et al., 2001	C.wuellerstorfi
162-982A-23H-3-W 117	211.88	235.08	236.72	6.93075	6.92001	6.91309	0.56	2.28	0	0.64	0.56		2.92	Hodell et al., 2001	C.mundulus
162-982A-23H-3-W 127	211.98	235.18	236.82	6.93287	6.92232	6.91473	0.91	2.1	0	0.64	0.91	0.91	2.74	Hodell et al., 2001	C.wuellerstorfi
162-982A-23H-3-W 127	211.98	235.18	236.82	6.93287	6.92232	6.91473	0.75	2.23	0	0.64	0.75		2.87	Hodell et al., 2001	C.mundulus
162-982A-23H-3-W 137	212.08	235.28	236.92	6.935	6.92463	6.91636	0.8	2.15	0	0.64	0.8	0.8	2.79	Hodell et al., 2001	C.wuellerstorfi
162-982A-23H-3-W 147	212.18	235.38	237.02	6.93713	6.92695	6.91799	0.59	2.21	0	0.64	0.59		2.85	Hodell et al., 2001	C.mundulus
162-982A-23H-4-W 9	212.29	235.49	237.13	6.93946	6.92949	6.91978	0.83	2.35	0	0.64	0.83	0.83	2.99	New data (this study)	C.wuellerstorfi
162-982A-23H-4-W 19	212.39	235.59	237.23	6.94159	6.9318	6.92141	0.71	2.31	0	0.64	0.71	0.71	2.95	New data (this study)	C.wuellerstorfi
162-982A-23H-4-W 19	212.39	235.59	237.23	6.94159	6.9318	6.92141	0.75	2.25	0	0.64	0.75	0.75	2.89	New data (this study)	C.wuellerstorfi
162-982A-23H-4-W 29	212.49	235.69	237.33	6.94372	6.93412	6.92304	0.88	2.34	0	0.64	0.88	0.88	2.98	New data (this study)	C.wuellerstorfi
162-982A-23H-4-W 39	212.59	235.79	237.43	6.94584	6.93643	6.92467	0.9	2.29	0	0.64	0.9	0.9	2.93	New data (this study)	C.wuellerstorfi
162-982A-23H-4-W 49	212.69	235.89	237.53	6.94797	6.93874	6.9263	0.96	2.32	0	0.64	0.96	0.96	2.96	New data (this study)	C.wuellerstorfi
162-982A-23H-4-W 59	212.79	235.99	237.63	6.95009	6.94105	6.92793	0.88	2.21	0	0.64	0.88	0.88	2.85	New data (this study)	C.wuellerstorfi
162-982A-23H-4-W 69	212.89	236.09	237.73	6.95222	6.94337	6.92956	0.92	2.31	0	0.64	0.92	0.92	2.95	New data (this study)	C.wuellerstorfi
162-982A-23H-4-W 79	212.99	236.19	237.83	6.95435	6.94568	6.93119	0.75	2.27	0	0.64	0.75	0.75	2.91	New data (this study)	C.wuellerstorfi
162-982A-23H-4-W 89	213.09	236.29	237.93	6.95647	6.94799	6.93283	0.84	2.21	0	0.64	0.84	0.84	2.85	New data (this study)	C.wuellerstorfi
162-982A-23H-4-W 99	213.19	236.39	238.03	6.9586	6.95031	6.93446	0.9	2.27	0	0.64	0.9	0.9	2.91	New data (this study)	C.wuellerstorfi
162-982A-23H-4-W 109	213.29	236.49	238.13	6.96073	6.95262	6.93609	0.72	2.03	0	0.64	0.72	0.72	2.67	New data (this study)	C.wuellerstorfi
162-982A-23H-4-W 119	213.39	236.59	238.23	6.96285	6.95493	6.93772	0.84	2.22	0	0.64	0.84	0.84	2.86	New data (this study)	C.wuellerstorfi
162-982A-23H-4-W 129	213.49	236.69	238.33	6.96498	6.95724	6.93935	0.67	2.11	0	0.64	0.67	0.67	2.75	New data (this study)	C.wuellerstorfi
162-982A-23H-4-W 139	213.59	236.79	238.43	6.9671	6.95956	6.9433	0.71	1.99	0	0.64	0.71	0.71	2.63	New data (this study)	C.wuellerstorfi
162-982A-23H-4-W 139	213.59	236.79	238.43	6.9671	6.95956	6.9433	0.76	1.94	0	0.64	0.76	0.76	2.58	New data (this study)	C.wuellerstorfi
162-982A-23H-4-W 139	213.59	236.79	238.43	6.9671	6.95956	6.9433	0.3	2.07	0	0.64	0.3		2.71	New data (this study)	C.mundulus
162-982A-23H-4-W 149	213.69	236.89	238.53	6.96923	6.96187	6.9488	0.63	2.14	0	0.64	0.63	0.63	2.78	New data (this study)	C.wuellerstorfi
162-982A-23H-5-W 9	213.79	236.99	238.63	6.97136	6.96418	6.9543	0.57	2.27	0	0.64	0.57	0.57	2.91	New data (this study)	C.wuellerstorfi
162-982A-23H-5-W 19	213.89	237.09	238.73	6.97348	6.9665	6.9598	0.58	2.23	0	0.64	0.58	0.58	2.87	New data (this study)	C.wuellerstorfi
162-982A-23H-5-W 29	213.99	237.19	238.83	6.97561	6.96881	6.96413	0.82	2.27	0	0.64	0.82	0.82	2.91	New data (this study)	C.wuellerstorfi
162-982A-23H-5-W 39	214.09	237.29	238.93	6.97773	6.97112	6.96767	1.15	2.38	0	0.64	1.15	1.15	3.02	New data (this study)	C.wuellerstorfi
162-982A-23H-5-W 49	214.19	237.39	239.03	6.97986	6.97344	6.97122	0.8	2.25	0	0.64	0.8	0.8	2.89	New data (this study)	C.wuellerstorfi
162-982A-23H-5-W 59	214.29	237.49	239.13	6.98199	6.97575	6.97476	1.1	2.12	0	0.64	1.1	1.1	2.76	New data (this study)	C.wuellerstorfi
162-982A-23H-5-W 69	214.39	237.59	239.23	6.98411	6.97806	6.97831	1.09	2.2	0	0.64	1.09	1.09	2.84	New data (this study)	C.wuellerstorfi
162-982A-23H-5-W 69	214.39	237.59	239.23	6.98411	6.97806	6.97831	1.04	2.14	0	0.64	1.04	1.04	2.78	New data (this study)	C.wuellerstorfi
162-982A-23H-5-W 69	214.39	237.59	239.23	6.98411	6.97806	6.97831	0.93	2.1	0	0.64	0.93		2.74	New data (this study)	C.mundulus
162-982A-23H-5-W 79	214.49	237.69	239.33	6.98624	6.98037	6.98185	1.12	2.26	0	0.64	1.12	1.12	2.9	New data (this study)	C.wuellerstorfi
162-982A-23H-5-W 89	214.59	237.79	239.43	6.98837	6.98269	6.9854	1.08	2.14	0	0.64	1.08	1.08	2.78	New data (this study)	C.wuellerstorfi
162-982B-24H-2-W 7	216.08	235.53	239.47	6.98922	6.98361	6.92043	0.72	2.16	0	0.64	0.72		2.8	Hodell et al., 2001	C.mundulus
162-982B-24H-2-W 7	216.08	235.53	239.47	6.98922	6.98361	6.92043	0.78	2.11	0	0.64	0.78	0.78	2.75	Hodell et al., 2001	C.wuellerstorfi
162-982A-23H-5-W 99	214.69	237.89	239.53	6.99049	6.985	6.98895	1.06	2.11	0	0.64	1.06	1.06	2.75	New data (this study)	C.wuellerstorfi
162-982B-24H-2-W 17	216.18	235.63	239.57	6.99134	6.98593	6.92206	1.2	2.06	0	0.64	1.2	1.2	2.7	Hodell et al., 2001	C.wuellerstorfi
162-982A-23H-5-W 109	214.79	237.99	239.63	6.99262	6.98731	6.99249	1.13	2.09	0	0.64	1.13	1.13	2.73	New data (this study)	C.wuellerstorfi
162-982B-24H-2-W 27	216.28	235.73	239.67	6.99347	6.98824	6.92369	1.19	2.06	0	0.64	1.19	1.19	2.7	Hodell et al., 2001	C.wuellerstorfi
162-982A-23H-5-W 119	214.89	238.09	239.73	6.99474	6.98963	6.99604	1.16	1.98	0	0.64	1.16	1.16	2.62	New data (this study)	C.wuellerstorfi
162-982B-24H-2-W 37	216.38	235.83	239.77	6.99559	6.99055	6.92532	1.01	2.19	0	0.64	1.01	1.01	2.83	Hodell et al., 2001	C.wuellerstorfi
162-982B-24H-2-W 37	216.38	235.83	239.77	6.99559	6.99055	6.92532	1.01	1.96	0	0.64	1.01		2.6	Hodell et al., 2001	C.mundulus
162-982A-23H-5-W 129	214.99	238.19	239.83	6.99687	6.99194	6.99958	1.09	2.1	0	0.64	1.09	1.09	2.74	New data (this study)	C.wuellerstorfi
162-982B-24H-2-W 47	216.48	235.93	239.87	6.99772	6.99286	6.92695	1.04	2.03	0	0.64	1.04		2.67	Hodell et al., 2001	C.mundulus
162-982B-24H-2-W 47	216.48	235.93	239.87	6.99772	6.99286	6.92695	1.09	2.01	0	0.64	1.09	1.09	2.65	Hodell et al., 2001	C.wuellerstorfi
162-982B-24H-2-W 57	216.58	236.03	239.97	6.99985	6.99518	6.92859	0.92	2.08	0	0.64	0.92	0.92	2.72	Hodell et al., 2001	C.wuellerstorfi
162-982B-24H-2-W 57	216.58	236.03	239.97	6.99985	6.99518	6.92859	0.89	2.13	0	0.64	0.89		2.77	Hodell et al., 2001	C.mundulus
162-982B-24H-2-W 67	216.68	236.13	240.07	7.00197	6.99749	6.93022	1.12	2.11	0	0.64	1.12	1.12	2.75	Hodell et al., 2001	C.wuellerstorfi
162-982B-24H-2-W 77	216.78	236.23	240.17	7.0041	6.9998	6.93185	0.72	2.17	0	0.64	0.72		2.81	Hodell et al., 2001	C.mundulus
162-982B-24H-2-W 77	216.78	236.23	240.17	7.0041	6.9998	6.93185	0.99	2.01	0	0.64	0.99	0.99	2.65	Hodell et al., 2001	C.wuellerstorfi
162-982B-24H-2-W 97	216.98	236.43	240.37	7.00835	7.00443	6.93511	0.95	2.15	0	0.64	0.95	0.95	2.79	Hodell et al., 2001	C.wuellerstorfi
162-982B-24H-2-W 127	217.28	236.73	240.67	7.01473	7.01137	6.94	0.75	2.3	0	0.64	0.75	0.75	2.94	Hodell et al., 2001	C.wuellerstorfi
162-982B-24H-2-W 127	217.28	236.73	240.67	7.01473	7.01137	6.94	0.51	2.28	0	0.64	0.51		2.92	Hodell et al., 2001	C.mundulus
162-982B-24H-2-W 137	217.38	236.83	240.77	7.01686	7.01368	6.9455	0.63	2.23	0	0.64	0.63	0.63	2.87	Hodell et al., 2001	C.wuellerstorfi
162-982B-24H-2-W 137	217.38	236.83	240.77	7.01686	7.01368	6.9455	0.52	2.23	0	0.64	0.52		2.87	Hodell et al., 2001	C.mundulus
162-982B-24H-3-W 7	217.58	237.03	240.97	7.02111	7.01831	6.9565	0.83	2.22	0	0.64	0.83	0.83	2.86	Hodell et al., 2001	C.wuellerstorfi
162-982B-24H-3-W 7	217.58	237.03	240.97	7.02111	7.01831	6.9565	0.46	2.21	0	0.64	0.46		2.85	Hodell et al., 2001	C.mundulus
162-982B-24H-3-W 17	217.68	237.13	241.07	7.02323	7.02062	6.962	0.33	2.35	0	0.64	0.33	0.33	2.99	Hodell et al., 2001	C.wuellerstorfi
162-982B-24H-3-W 17	217.68	237.13	241.07	7.02323	7.02062	6.962	0.63	2.2	0	0.64	0.63		2.84	Hodell et al., 2001	C.mundulus
162-982B-24H-3-W 27	217.78	237.23	241.17	7.02536	7.02293	6.96555	0.83	2.05	0	0.64	0.83		2.69	Hodell et al., 2001	C.mundulus
162-982B-24H-3-W 27	217.78	237.23	241.17	7.02536	7.02293	6.96555	0.89	2.03	0	0.64	0.89	0.89	2.67	Hodell et al., 2001	C.wuellerstorfi
162-982B-24H-3-W 37	217.88	237.33	241.27	7.02749	7.02525	6.96909	0.61	2.01	0	0.64	0.61		2.65	Hodell et al., 2001	C.mundulus
162-982B-24H-3-W 37	217.88	237.33	241.27	7.02749	7.02525	6.96909	0.98	1.93	0	0.64	0.98	0.98	2.57	Hodell et al., 2001	C.wuellerstorfi
162-982B-24H-3-W 47	217.98	237.43	241.37	7.02961	7.02756	6.97264	0.67	1.94	0	0.64	0.67		2.58	Hodell et al., 2001	C.mundulus
162-982B-24H-3-W 47	217.98	237.43	241.37	7.02961	7.02756	6.97264	0.81	1.98	0	0.64	0.81	0.81	2.62	Hodell et al., 2001	C.wuellerstorfi
162-982B-24H-3-W 57	218.08	237.53	241.47	7.03174	7.02987	6.97618	0.99	1.99	0	0.64	0.99	0.99	2.63	Hodell et al., 2001	C.wuellerstorfi
162-982B-24H-3-W 57	218.08	237.53	241.47	7.03174	7.02987	6.97618	0.82	1.98	0	0.64	0.82		2.62	Hodell et al., 2001	C.mundulus
162-982B-24H-3-W 77	218.28	237.73	241.67	7.03599	7.0345	6.98327	0.92	2.01	0	0.64	0.92		2.65	Hodell et al., 2001	C.mundulus
162-982B-24H-3-W 77	218.28	237.73	241.67	7.03599	7.0345	6.98327	1.19	2.14	0	0.64	1.19	1.19	2.78	Hodell et al., 2001	C.wuellerstorfi
162-982B-24H-3-W 87	218.38	237.83	241.77	7.03812	7.03681	6.98682	0.78	2.14	0	0.64	0.78		2.78	Hodell et al., 2001	C.mundulus
162-982B-24H-3-W 87	218.38	237.83	241.77	7.03812	7.03681	6.98682	0.96	2.27	0	0.64	0.96	0.96	2.91	Hodell et al., 2001	C.wuellerstorfi
162-982B-24H-3-W 97	218.48	237.93	241.87	7.04024	7.03912	6.99036	0.5	2.14	0	0.64	0.5		2.78	Hodell et al., 2001	C.mundulus
162-982B-24H-3-W 97	218.48	237.93	241.87	7.04024	7.03912	6.99036	0.8	2.04	0	0.64	0.8	0.8	2.68	Hodell et al., 2001	C.wuellerstorfi
162-982B-24H-3-W 107	218.58	238.03	241.97	7.04237	7.04144	6.99391	0.96	2.19	0	0.64	0.96	0.96	2.83	Hodell et al., 2001	C.wuellerstorfi
162-982B-24H-3-W 107	218.58	238.03	241.97	7.04237	7.04144	6.99391	1	2.23	0	0.64	1		2.87	Hodell et al., 2001	C.mundulus
162-982B-24H-3-W 117	218.68	238.13	242.07	7.0445	7.04375	6.99745	0.7	2.15	0	0.64	0.7		2.79	Hodell et al., 2001	C.mundulus
162-982B-24H-3-W 117	218.68	238.13	242.07	7.0445	7.04375	6.99745	0.9	2.11	0	0.64	0.9	0.9	2.75	Hodell et al., 2001	C.wuellerstorfi
162-982B-24H-3-W 127	218.78	238.23	242.17	7.04662	7.04606	7.001	0.9	2.05	0	0.64	0.9	0.9	2.69	Hodell et al., 2001	C.wuellerstorfi
162-982B-24H-3-W 137	218.88	238.33	242.27	7.04875	7.04837	7.00342	0.69	2.15	0	0.64	0.69		2.79	Hodell et al., 2001	C.mundulus
162-982B-24H-3-W 137	218.88	238.33	242.27	7.04875	7.04837	7.00342	0.88	2.02	0	0.64	0.88	0.88	2.66	Hodell et al., 2001	C.wuellerstorfi
162-982B-24H-4-W 7	219.08	238.53	242.47	7.053	7.053	7.00826	0.56	1.94	0	0.64	0.56	0.56	2.58	Hodell et al., 2001	C.wuellerstorfi
162-982B-24H-4-W 17	219.18	238.63	242.57	7.05506	7.05556	7.01067	0.6	2.03	0	0.64	0.6	0.6	2.67	Hodell et al., 2001	C.wuellerstorfi
162-982B-24H-4-W 27	219.28	238.73	242.67	7.05712	7.05811	7.01309	0.48	2.22	0	0.64	0.48		2.86	Hodell et al., 2001	C.mundulus
162-982B-24H-4-W 27	219.28	238.73	242.67	7.05712	7.05811	7.01309	0.76	2.19	0	0.64	0.76	0.76	2.83	Hodell et al., 2001	C.wuellerstorfi
162-982B-24H-4-W 37	219.38	238.83	242.77	7.05918	7.06067	7.01551	0.57	2.16	0	0.64	0.57		2.8	Hodell et al., 2001	C.mundulus
162-982B-24H-4-W 37	219.38	238.83	242.77	7.05918	7.06067	7.01551	0.71	2.27	0	0.64	0.71	0.71	2.91	Hodell et al., 2001	C.wuellerstorfi
162-982B-24H-4-W 57	219.58	239.03	242.97	7.0633	7.06578	7.02035	0.78	2.19	0	0.64	0.78		2.83	Hodell et al., 2001	C.mundulus
162-982B-24H-4-W 57	219.58	239.03	242.97	7.0633	7.06578	7.02035	0.46	2.38	0	0.64	0.46	0.46	3.02	Hodell et al., 2001	C.wuellerstorfi
162-982B-24H-4-W 67	219.68	239.13	243.07	7.06536	7.06833	7.02277	0.86	2.24	0	0.64	0.86		2.88	Hodell et al., 2001	C.mundulus
162-982B-24H-4-W 67	219.68	239.13	243.07	7.06536	7.06833	7.02277	1	2.09	0	0.64	1	1	2.73	Hodell et al., 2001	C.wuellerstorfi
162-982B-24H-4-W 77	219.78	239.23	243.17	7.06742	7.07089	7.02518	0.26	2.27	0	0.64	0.26		2.91	Hodell et al., 2001	C.mundulus
162-982B-24H-4-W 77	219.78	239.23	243.17	7.06742	7.07089	7.02518	0.87	2.18	0	0.64	0.87	0.87	2.82	Hodell et al., 2001	C.wuellerstorfi
162-982B-24H-4-W 87	219.88	239.33	243.27	7.06948	7.07344	7.0276	0.74	1.98	0	0.64	0.74	0.74	2.62	Hodell et al., 2001	C.wuellerstorfi
162-982B-24H-4-W 87	219.88	239.33	243.27	7.06948	7.07344	7.0276	0.81	2.17	0	0.64	0.81		2.81	Hodell et al., 2001	C.mundulus
162-982B-24H-4-W 97	219.98	239.43	243.37	7.07155	7.076	7.03002	0.81	1.84	0	0.64	0.81		2.48	Hodell et al., 2001	C.mundulus
162-982B-24H-4-W 97	219.98	239.43	243.37	7.07155	7.076	7.03002	0.91	1.43	0	0.64	0.91	0.91	2.07	Hodell et al., 2001	C.wuellerstorfi
162-982B-24H-4-W 107	220.08	239.53	243.47	7.07361	7.07795	7.03244	1.06	2.24	0	0.64	1.06	1.06	2.88	Hodell et al., 2001	C.wuellerstorfi
162-982B-24H-4-W 117	220.18	239.63	243.57	7.07567	7.0799	7.03486	1.12	2.1	0	0.64	1.12		2.74	Hodell et al., 2001	C.mundulus
162-982B-24H-4-W 117	220.18	239.63	243.57	7.07567	7.0799	7.03486	0.97	2.11	0	0.64	0.97	0.97	2.75	Hodell et al., 2001	C.wuellerstorfi
162-982B-24H-4-W 127	220.28	239.73	243.67	7.07773	7.08185	7.03728	1	2.32	0	0.64	1	1	2.96	Hodell et al., 2001	C.wuellerstorfi
162-982B-24H-4-W 137	220.38	239.83	243.77	7.07979	7.0838	7.03969	1.14	2.3	0	0.64	1.14	1.14	2.94	Hodell et al., 2001	C.wuellerstorfi
162-982B-24H-4-W 147	220.48	239.93	243.87	7.08185	7.08575	7.04211	0.88	2.4	0	0.64	0.88		3.04	Hodell et al., 2001	C.mundulus
162-982B-24H-4-W 147	220.48	239.93	243.87	7.08185	7.08575	7.04211	1.11	2.23	0	0.64	1.11	1.11	2.87	Hodell et al., 2001	C.wuellerstorfi
162-982B-24H-5-W 7	220.58	240.03	243.97	7.08391	7.0877	7.04453	0.96	2.15	0	0.64	0.96	0.96	2.79	Hodell et al., 2001	C.wuellerstorfi
162-982B-24H-5-W 17	220.68	240.13	244.07	7.08597	7.08965	7.04695	0.91	2.22	0	0.64	0.91	0.91	2.86	Hodell et al., 2001	C.wuellerstorfi
162-982A-24H-2-W 17	218.88	243.07	244.12	7.087	7.09063	7.11805	1.18	2.28	0	0.64	1.18	1.18	2.92	Hodell et al., 2001	C.wuellerstorfi
162-982A-24H-2-W 17	218.88	243.07	244.12	7.087	7.09063	7.11805	1.14	2.27	0	0.64	1.14		2.91	Hodell et al., 2001	C.mundulus
162-982B-24H-5-W 27	220.78	240.23	244.17	7.08803	7.0916	7.04937	1.12	2.23	0	0.64	1.12		2.87	Hodell et al., 2001	C.mundulus
162-982B-24H-5-W 27	220.78	240.23	244.17	7.08803	7.0916	7.04937	1.13	2.14	0	0.64	1.13	1.13	2.78	Hodell et al., 2001	C.wuellerstorfi
162-982A-24H-2-W 27	218.98	243.17	244.22	7.08906	7.09258	7.12047	1.11	2.24	0	0.64	1.11		2.88	Hodell et al., 2001	C.mundulus
162-982B-24H-5-W 37	220.88	240.33	244.27	7.09009	7.09356	7.05179	1.03	1.96	0	0.64	1.03	1.03	2.6	Hodell et al., 2001	C.wuellerstorfi
162-982A-24H-2-W 37	219.08	243.27	244.32	7.09112	7.09453	7.12289	0.98	2.33	0	0.64	0.98	0.98	2.97	Hodell et al., 2001	C.wuellerstorfi
162-982A-24H-2-W 37	219.08	243.27	244.32	7.09112	7.09453	7.12289	1.05	2.18	0	0.64	1.05		2.82	Hodell et al., 2001	C.mundulus
162-982B-24H-5-W 47	220.98	240.43	244.37	7.09215	7.09551	7.0542	0.97	2.3	0	0.64	0.97	0.97	2.94	Hodell et al., 2001	C.wuellerstorfi
162-982A-24H-2-W 47	219.18	243.37	244.42	7.09318	7.09648	7.12531	1.01	2.27	0	0.64	1.01	1.01	2.91	Hodell et al., 2001	C.wuellerstorfi
162-982B-24H-5-W 57	221.08	240.53	244.47	7.09421	7.09746	7.05662	1.26	2.43	0	0.64	1.26	1.26	3.07	Hodell et al., 2001	C.wuellerstorfi
162-982A-24H-2-W 57	219.28	243.47	244.52	7.09524	7.09843	7.12772	0.73	2.16	0	0.64	0.73	0.73	2.8	Hodell et al., 2001	C.wuellerstorfi
162-982B-24H-5-W 67	221.18	240.63	244.57	7.09627	7.09941	7.05904	1.05	2.15	0	0.64	1.05	1.05	2.79	Hodell et al., 2001	C.wuellerstorfi
162-982A-24H-2-W 67	219.38	243.57	244.62	7.0973	7.10038	7.13014	1.15	2.24	0	0.64	1.15	1.15	2.88	Hodell et al., 2001	C.wuellerstorfi
162-982A-24H-2-W 67	219.38	243.57	244.62	7.0973	7.10038	7.13014	0.96	2.29	0	0.64	0.96		2.93	Hodell et al., 2001	C.mundulus
162-982B-24H-5-W 77	221.28	240.73	244.67	7.09833	7.10136	7.06146	1.16	2.24	0	0.64	1.16	1.16	2.88	Hodell et al., 2001	C.wuellerstorfi
162-982A-24H-2-W 77	219.48	243.67	244.72	7.09936	7.10233	7.13256	1.04	2.13	0	0.64	1.04	1.04	2.77	Hodell et al., 2001	C.wuellerstorfi
162-982A-24H-2-W 77	219.48	243.67	244.72	7.09936	7.10233	7.13256	1.05	2.23	0	0.64	1.05		2.87	Hodell et al., 2001	C.mundulus
162-982B-24H-5-W 87	221.38	240.83	244.77	7.10039	7.10331	7.06388	1.15	2.16	0	0.64	1.15	1.15	2.8	Hodell et al., 2001	C.wuellerstorfi
162-982A-24H-2-W 87	219.58	243.77	244.82	7.10142	7.10428	7.13498	1.08	2.25	0	0.64	1.08	1.08	2.89	Hodell et al., 2001	C.wuellerstorfi
162-982A-24H-2-W 87	219.58	243.77	244.82	7.10142	7.10428	7.13498	1.08	2.47	0	0.64	1.08		3.11	Hodell et al., 2001	C.mundulus
162-982B-24H-5-W 97	221.48	240.93	244.87	7.10245	7.10526	7.0663	1.25	2.2	0	0.64	1.25	1.25	2.84	Hodell et al., 2001	C.wuellerstorfi
162-982A-24H-2-W 97	219.68	243.87	244.92	7.10348	7.10623	7.1374	0.97	2.23	0	0.64	0.97	0.97	2.87	Hodell et al., 2001	C.wuellerstorfi
162-982B-24H-5-W 107	221.58	241.03	244.97	7.10452	7.10721	7.06872	1.28	2.17	0	0.64	1.28	1.28	2.81	Hodell et al., 2001	C.wuellerstorfi
162-982A-24H-2-W 107	219.78	243.97	245.02	7.10555	7.10819	7.13982	1.15	2.1	0	0.64	1.15	1.15	2.74	Hodell et al., 2001	C.wuellerstorfi
162-982B-24H-5-W 117	221.68	241.13	245.07	7.10658	7.10916	7.07113	1.2	2.18	0	0.64	1.2	1.2	2.82	Hodell et al., 2001	C.wuellerstorfi
162-982A-24H-2-W 117	219.88	244.07	245.12	7.10761	7.11014	7.14223	0.97	2.2	0	0.64	0.97		2.84	Hodell et al., 2001	C.mundulus
162-982A-24H-2-W 117	219.88	244.07	245.12	7.10761	7.11014	7.14223	1.04	2.13	0	0.64	1.04	1.04	2.77	Hodell et al., 2001	C.wuellerstorfi
162-982A-24H-2-W 127	219.98	244.17	245.22	7.10967	7.11209	7.14465	1.09	2.16	0	0.64	1.09		2.8	Hodell et al., 2001	C.mundulus
162-982A-24H-2-W 127	219.98	244.17	245.22	7.10967	7.11209	7.14465	1.2	2.1	0	0.64	1.2	1.2	2.74	Hodell et al., 2001	C.wuellerstorfi
162-982B-24H-5-W 137	221.88	241.33	245.27	7.1107	7.11306	7.07597	0.96	2.21	0	0.64	0.96		2.85	Hodell et al., 2001	C.mundulus
162-982B-24H-5-W 137	221.88	241.33	245.27	7.1107	7.11306	7.07597	0.83	2.04	0	0.64	0.83	0.83	2.68	Hodell et al., 2001	C.wuellerstorfi
162-982A-24H-2-W 137	220.08	244.27	245.32	7.11173	7.11404	7.14707	1.14	2.14	0	0.64	1.14	1.14	2.78	Hodell et al., 2001	C.wuellerstorfi
162-982B-24H-5-W 147	221.98	241.43	245.37	7.11276	7.11501	7.07839	1.14	2.05	0	0.64	1.14		2.69	Hodell et al., 2001	C.mundulus
162-982B-24H-5-W 147	221.98	241.43	245.37	7.11276	7.11501	7.07839	1.03	2.03	0	0.64	1.03	1.03	2.67	Hodell et al., 2001	C.wuellerstorfi
162-982A-24H-2-W 147	220.18	244.37	245.42	7.11379	7.11599	7.14949	1.16	1.99	0	0.64	1.16	1.16	2.63	Hodell et al., 2001	C.wuellerstorfi
162-982B-24H-6-W 7	222.08	241.53	245.47	7.11482	7.11696	7.08081	0.9	2.14	0	0.64	0.9		2.78	Hodell et al., 2001	C.mundulus
162-982B-24H-6-W 7	222.08	241.53	245.47	7.11482	7.11696	7.08081	1.11	2.06	0	0.64	1.11	1.11	2.7	Hodell et al., 2001	C.wuellerstorfi
162-982A-24H-3-W 7	220.28	244.47	245.52	7.11585	7.11794	7.15191	0.62	2.11	0	0.64	0.62		2.75	Hodell et al., 2001	C.mundulus
162-982A-24H-3-W 7	220.28	244.47	245.52	7.11585	7.11794	7.15191	1.08	1.99	0	0.64	1.08	1.08	2.63	Hodell et al., 2001	C.wuellerstorfi
162-982B-24H-6-W 17	222.18	241.63	245.57	7.11688	7.11891	7.08323	0.74	2.12	0	0.64	0.74		2.76	Hodell et al., 2001	C.mundulus
162-982B-24H-6-W 17	222.18	241.63	245.57	7.11688	7.11891	7.08323	1.14	1.96	0	0.64	1.14	1.14	2.6	Hodell et al., 2001	C.wuellerstorfi
162-982A-24H-3-W 17	220.38	244.57	245.62	7.11791	7.11989	7.15433	0.77	2.15	0	0.64	0.77		2.79	Hodell et al., 2001	C.mundulus
162-982A-24H-3-W 17	220.38	244.57	245.62	7.11791	7.11989	7.15433	1.06	2	0	0.64	1.06	1.06	2.64	Hodell et al., 2001	C.wuellerstorfi
162-982A-24H-3-W 37	220.58	244.77	245.82	7.12203	7.12379	7.15916	0.99	2.16	0	0.64	0.99		2.8	Hodell et al., 2001	C.mundulus
162-982A-24H-3-W 37	220.58	244.77	245.82	7.12203	7.12379	7.15916	0.99	2.01	0	0.64	0.99	0.99	2.65	Hodell et al., 2001	C.wuellerstorfi
162-982B-24H-6-W 47	222.48	241.93	245.87	7.12306	7.12477	7.09048	1.02	2.09	0	0.64	1.02		2.73	Hodell et al., 2001	C.mundulus
162-982B-24H-6-W 47	222.48	241.93	245.87	7.12306	7.12477	7.09048	0.94	2.06	0	0.64	0.94	0.94	2.7	Hodell et al., 2001	C.wuellerstorfi
162-982A-24H-3-W 47	220.68	244.87	245.92	7.12409	7.12574	7.16158	1.06	2.11	0	0.64	1.06	1.06	2.75	Hodell et al., 2001	C.wuellerstorfi
162-982B-24H-6-W 57	222.58	242.03	245.97	7.12512	7.12672	7.0929	0.93	2.06	0	0.64	0.93		2.7	Hodell et al., 2001	C.mundulus
162-982B-24H-6-W 57	222.58	242.03	245.97	7.12512	7.12672	7.0929	1.09	2.09	0	0.64	1.09	1.09	2.73	Hodell et al., 2001	C.wuellerstorfi
162-982A-24H-3-W 57	220.78	244.97	246.02	7.12615	7.12769	7.164	0.88	2.07	0	0.64	0.88		2.71	Hodell et al., 2001	C.mundulus
162-982A-24H-3-W 57	220.78	244.97	246.02	7.12615	7.12769	7.164	0.97	2.1	0	0.64	0.97	0.97	2.74	Hodell et al., 2001	C.wuellerstorfi
162-982B-24H-6-W 67	222.68	242.13	246.07	7.12718	7.12867	7.09532	0.97	2.03	0	0.64	0.97		2.67	Hodell et al., 2001	C.mundulus
162-982B-24H-6-W 67	222.68	242.13	246.07	7.12718	7.12867	7.09532	0.87	1.94	0	0.64	0.87	0.87	2.58	Hodell et al., 2001	C.wuellerstorfi
162-982A-24H-3-W 67	220.88	245.07	246.12	7.12821	7.12964	7.1682	0.94	1.95	0	0.64	0.94		2.59	Hodell et al., 2001	C.mundulus
162-982A-24H-3-W 67	220.88	245.07	246.12	7.12821	7.12964	7.1682	1	1.97	0	0.64	1	1	2.61	Hodell et al., 2001	C.wuellerstorfi
162-982B-24H-6-W 77	222.78	242.23	246.17	7.12924	7.13062	7.09774	0.96	2.01	0	0.64	0.96		2.65	Hodell et al., 2001	C.mundulus
162-982B-24H-6-W 77	222.78	242.23	246.17	7.12924	7.13062	7.09774	1.05	2.04	0	0.64	1.05	1.05	2.68	Hodell et al., 2001	C.wuellerstorfi
162-982A-24H-3-W 77	220.98	245.17	246.22	7.13027	7.13159	7.1724	0.93	2.01	0	0.64	0.93		2.65	Hodell et al., 2001	C.mundulus
162-982A-24H-3-W 77	220.98	245.17	246.22	7.13027	7.13159	7.1724	1	1.96	0	0.64	1	1	2.6	Hodell et al., 2001	C.wuellerstorfi
162-982B-24H-6-W 87	222.88	242.33	246.27	7.1313	7.13257	7.10015	0.85	2.06	0	0.64	0.85		2.7	Hodell et al., 2001	C.mundulus
162-982B-24H-6-W 87	222.88	242.33	246.27	7.1313	7.13257	7.10015	0.99	2.11	0	0.64	0.99	0.99	2.75	Hodell et al., 2001	C.wuellerstorfi
162-982A-24H-3-W 87	221.08	245.27	246.32	7.13233	7.13354	7.1766	0.84	2.17	0	0.64	0.84		2.81	Hodell et al., 2001	C.mundulus
162-982A-24H-3-W 87	221.08	245.27	246.32	7.13233	7.13354	7.1766	0.97	2.08	0	0.64	0.97	0.97	2.72	Hodell et al., 2001	C.wuellerstorfi
162-982B-24H-6-W 97	222.98	242.43	246.37	7.13336	7.13452	7.10257	0.99	2.27	0	0.64	0.99		2.91	Hodell et al., 2001	C.mundulus
162-982B-24H-6-W 97	222.98	242.43	246.37	7.13336	7.13452	7.10257	0.93	2.17	0	0.64	0.93	0.93	2.81	Hodell et al., 2001	C.wuellerstorfi
162-982A-24H-3-W 97	221.18	245.37	246.42	7.13439	7.13549	7.1808	0.97	2.28	0	0.64	0.97		2.92	Hodell et al., 2001	C.mundulus
162-982A-24H-3-W 97	221.18	245.37	246.42	7.13439	7.13549	7.1808	0.99	2.22	0	0.64	0.99	0.99	2.86	Hodell et al., 2001	C.wuellerstorfi
162-982B-24H-6-W 107	223.08	242.53	246.47	7.13542	7.13647	7.10499	0.89	2.27	0	0.64	0.89		2.91	Hodell et al., 2001	C.mundulus
162-982B-24H-6-W 107	223.08	242.53	246.47	7.13542	7.13647	7.10499	0.86	2.21	0	0.64	0.86	0.86	2.85	Hodell et al., 2001	C.wuellerstorfi
162-982A-24H-3-W 107	221.28	245.47	246.52	7.13645	7.13744	7.17729	0.88	2.23	0	0.64	0.88		2.87	Hodell et al., 2001	C.mundulus
162-982A-24H-3-W 107	221.28	245.47	246.52	7.13645	7.13744	7.17729	0.84	2.29	0	0.64	0.84	0.84	2.93	Hodell et al., 2001	C.wuellerstorfi
162-982B-24H-6-W 117	223.18	242.63	246.57	7.13748	7.13842	7.10741	0.56	2.33	0	0.64	0.56		2.97	Hodell et al., 2001	C.mundulus
162-982B-24H-6-W 117	223.18	242.63	246.57	7.13748	7.13842	7.10741	0.81	2.23	0	0.64	0.81	0.81	2.87	Hodell et al., 2001	C.wuellerstorfi
162-982A-24H-3-W 117	221.38	245.57	246.62	7.13851	7.13939	7.17951	0.86	2.3	0	0.64	0.86		2.94	Hodell et al., 2001	C.mundulus
162-982A-24H-3-W 117	221.38	245.57	246.62	7.13851	7.13939	7.17951	0.91	2.29	0	0.64	0.91	0.91	2.93	Hodell et al., 2001	C.wuellerstorfi
162-982B-24H-6-W 127	223.28	242.73	246.67	7.13955	7.14037	7.10983	1.04	2.32	0	0.64	1.04		2.96	Hodell et al., 2001	C.mundulus
162-982B-24H-6-W 127	223.28	242.73	246.67	7.13955	7.14037	7.10983	0.8	2.27	0	0.64	0.8	0.8	2.91	Hodell et al., 2001	C.wuellerstorfi
162-982A-24H-3-W 127	221.48	245.67	246.72	7.14058	7.14135	7.18174	0.8	2.14	0	0.64	0.8	0.8	2.78	Hodell et al., 2001	C.wuellerstorfi
162-982B-24H-6-W 137	223.38	242.83	246.77	7.14161	7.14232	7.11225	1.01	2.23	0	0.64	1.01	1.01	2.87	Hodell et al., 2001	C.wuellerstorfi
162-982A-24H-3-W 137	221.58	245.77	246.82	7.14264	7.1433	7.18396	0.86	2.19	0	0.64	0.86		2.83	Hodell et al., 2001	C.mundulus
162-982A-24H-3-W 137	221.58	245.77	246.82	7.14264	7.1433	7.18396	0.95	2.22	0	0.64	0.95	0.95	2.86	Hodell et al., 2001	C.wuellerstorfi
162-982B-24H-6-W 147	223.48	242.93	246.87	7.14367	7.14427	7.11466	1.03	2.1	0	0.64	1.03		2.74	Hodell et al., 2001	C.mundulus
162-982B-24H-6-W 147	223.48	242.93	246.87	7.14367	7.14427	7.11466	1.16	2.19	0	0.64	1.16	1.16	2.83	Hodell et al., 2001	C.wuellerstorfi
162-982A-24H-3-W 147	221.68	245.87	246.92	7.1447	7.14525	7.18619	0.9	2.22	0	0.64	0.9		2.86	Hodell et al., 2001	C.mundulus
162-982A-24H-3-W 147	221.68	245.87	246.92	7.1447	7.14525	7.18619	1.02	2.07	0	0.64	1.02	1.02	2.71	Hodell et al., 2001	C.wuellerstorfi
162-982B-24H-7-W 7	223.58	243.03	246.97	7.14573	7.14622	7.11708	1.12	2.07	0	0.64	1.12		2.71	Hodell et al., 2001	C.mundulus
162-982B-24H-7-W 7	223.58	243.03	246.97	7.14573	7.14622	7.11708	1.08	2.05	0	0.64	1.08	1.08	2.69	Hodell et al., 2001	C.wuellerstorfi
162-982A-24H-4-W 7	221.78	245.97	247.02	7.14676	7.1472	7.18841	1.06	2.11	0	0.64	1.06		2.75	Hodell et al., 2001	C.mundulus
162-982A-24H-4-W 7	221.78	245.97	247.02	7.14676	7.1472	7.18841	1.21	2.13	0	0.64	1.21	1.21	2.77	Hodell et al., 2001	C.wuellerstorfi
162-982A-24H-4-W 17	221.88	246.07	247.12	7.14882	7.14915	7.19064	1.03	1.96	0	0.64	1.03		2.6	Hodell et al., 2001	C.mundulus
162-982A-24H-4-W 17	221.88	246.07	247.12	7.14882	7.14915	7.19064	1.01	2.11	0	0.64	1.01	1.01	2.75	Hodell et al., 2001	C.wuellerstorfi
162-982A-24H-4-W 27	221.98	246.17	247.22	7.15088	7.1511	7.19286	0.97	1.93	0	0.64	0.97		2.57	Hodell et al., 2001	C.mundulus
162-982A-24H-4-W 27	221.98	246.17	247.22	7.15088	7.1511	7.19286	1.16	1.99	0	0.64	1.16	1.16	2.63	Hodell et al., 2001	C.wuellerstorfi
162-982A-24H-4-W 37	222.08	246.27	247.32	7.15294	7.15305	7.19508	1.11	2	0	0.64	1.11		2.64	Hodell et al., 2001	C.mundulus
162-982A-24H-4-W 37	222.08	246.27	247.32	7.15294	7.15305	7.19508	1.01	1.99	0	0.64	1.01	1.01	2.63	Hodell et al., 2001	C.wuellerstorfi
162-982A-24H-4-W 47	222.18	246.37	247.42	7.155	7.155	7.19731	1.12	2.04	0	0.64	1.12		2.68	Hodell et al., 2001	C.mundulus
162-982A-24H-4-W 47	222.18	246.37	247.42	7.155	7.155	7.19731	1.23	1.89	0	0.64	1.23	1.23	2.53	Hodell et al., 2001	C.wuellerstorfi
162-982A-24H-4-W 57	222.28	246.47	247.52	7.15733	7.15714	7.19953	1.19	1.99	0	0.64	1.19		2.63	Hodell et al., 2001	C.mundulus
162-982A-24H-4-W 57	222.28	246.47	247.52	7.15733	7.15714	7.19953	1.18	1.86	0	0.64	1.18	1.18	2.5	Hodell et al., 2001	C.wuellerstorfi
162-982A-24H-4-W 67	222.38	246.57	247.62	7.15966	7.15929	7.20176	1	1.94	0	0.64	1		2.58	Hodell et al., 2001	C.mundulus
162-982A-24H-4-W 67	222.38	246.57	247.62	7.15966	7.15929	7.20176	1.28	1.92	0	0.64	1.28	1.28	2.56	Hodell et al., 2001	C.wuellerstorfi
162-982A-24H-4-W 77	222.48	246.67	247.72	7.16198	7.16143	7.20398	1.04	1.99	0	0.64	1.04		2.63	Hodell et al., 2001	C.mundulus
162-982A-24H-4-W 77	222.48	246.67	247.72	7.16198	7.16143	7.20398	0.82	1.85	0	0.64	0.82	0.82	2.49	Hodell et al., 2001	C.wuellerstorfi
162-982A-24H-4-W 87	222.58	246.77	247.82	7.16431	7.16357	7.20621	1.08	1.92	0	0.64	1.08		2.56	Hodell et al., 2001	C.mundulus
162-982A-24H-4-W 87	222.58	246.77	247.82	7.16431	7.16357	7.20621	1.13	1.91	0	0.64	1.13	1.13	2.55	Hodell et al., 2001	C.wuellerstorfi
162-982A-24H-4-W 97	222.68	246.87	247.92	7.16664	7.16571	7.20843	1.14	2.04	0	0.64	1.14		2.68	Hodell et al., 2001	C.mundulus
162-982A-24H-4-W 97	222.68	246.87	247.92	7.16664	7.16571	7.20843	0.95	1.96	0	0.64	0.95	0.95	2.6	Hodell et al., 2001	C.wuellerstorfi
162-982A-24H-4-W 107	222.78	246.97	248.02	7.16897	7.16786	7.21065	0.94	1.99	0	0.64	0.94		2.63	Hodell et al., 2001	C.mundulus
162-982A-24H-4-W 107	222.78	246.97	248.02	7.16897	7.16786	7.21065	1.02	1.98	0	0.64	1.02	1.02	2.62	Hodell et al., 2001	C.wuellerstorfi
162-982A-24H-4-W 117	222.88	247.07	248.12	7.1713	7.17	7.21288	0.98	2.03	0	0.64	0.98		2.67	Hodell et al., 2001	C.mundulus
162-982A-24H-4-W 117	222.88	247.07	248.12	7.1713	7.17	7.21288	1.02	2.07	0	0.64	1.02	1.02	2.71	Hodell et al., 2001	C.wuellerstorfi
162-982A-24H-4-W 127	222.98	247.17	248.22	7.17363	7.17214	7.2151	0.99	1.95	0	0.64	0.99	0.99	2.59	Hodell et al., 2001	C.wuellerstorfi
162-982A-24H-4-W 127	222.98	247.17	248.22	7.17363	7.17214	7.2151	0.95	2.05	0	0.64	0.95		2.69	Hodell et al., 2001	C.mundulus
162-982A-24H-4-W 137	223.08	247.27	248.32	7.17595	7.17429	7.21733	0.88	2.14	0	0.64	0.88	0.88	2.78	Hodell et al., 2001	C.wuellerstorfi
162-982A-24H-4-W 137	223.08	247.27	248.32	7.17595	7.17429	7.21733	0.99	2.07	0	0.64	0.99		2.71	Hodell et al., 2001	C.mundulus
162-982A-24H-5-W 7	223.28	247.47	248.52	7.18061	7.17857	7.22178	0.93	2.15	0	0.64	0.93	0.93	2.79	Hodell et al., 2001	C.wuellerstorfi
162-982A-24H-5-W 7	223.28	247.47	248.52	7.18061	7.17857	7.22178	0.88	2.09	0	0.64	0.88		2.73	Hodell et al., 2001	C.mundulus
162-982A-24H-5-W 17	223.38	247.57	248.62	7.18294	7.18071	7.2343	0.89	2.12	0	0.64	0.89	0.89	2.76	Hodell et al., 2001	C.wuellerstorfi
162-982A-24H-5-W 17	223.38	247.57	248.62	7.18294	7.18071	7.2343	0.94	2.24	0	0.64	0.94		2.88	Hodell et al., 2001	C.mundulus
162-982A-24H-5-W 27	223.48	247.67	248.72	7.18527	7.18286	7.23644	0.96	2.23	0	0.64	0.96	0.96	2.87	Hodell et al., 2001	C.wuellerstorfi
162-982A-24H-5-W 27	223.48	247.67	248.72	7.18527	7.18286	7.23644	0.73	2.2	0	0.64	0.73		2.84	Hodell et al., 2001	C.mundulus
162-982A-24H-5-W 37	223.58	247.77	248.82	7.18759	7.185	7.23858	1.03	2.31	0	0.64	1.03	1.03	2.95	Hodell et al., 2001	C.wuellerstorfi
162-982A-24H-5-W 37	223.58	247.77	248.82	7.18759	7.185	7.23858	0.78	2.19	0	0.64	0.78		2.83	Hodell et al., 2001	C.mundulus
162-982A-24H-5-W 47	223.68	247.87	248.92	7.18992	7.18714	7.24072	0.81	2.13	0	0.64	0.81	0.81	2.77	Hodell et al., 2001	C.wuellerstorfi
162-982A-24H-5-W 47	223.68	247.87	248.92	7.18992	7.18714	7.24072	0.82	2.18	0	0.64	0.82		2.82	Hodell et al., 2001	C.mundulus
162-982A-24H-5-W 57	223.78	247.97	249.02	7.19225	7.18929	7.24286	1.1	2.17	0	0.64	1.1	1.1	2.81	Hodell et al., 2001	C.wuellerstorfi
162-982A-24H-5-W 57	223.78	247.97	249.02	7.19225	7.18929	7.24286	0.95	2.17	0	0.64	0.95		2.81	Hodell et al., 2001	C.mundulus
162-982A-24H-5-W 67	223.88	248.07	249.12	7.19458	7.19143	7.245	1.21	2.13	0	0.64	1.21	1.21	2.77	Hodell et al., 2001	C.wuellerstorfi
162-982A-24H-5-W 67	223.88	248.07	249.12	7.19458	7.19143	7.245	1.06	2.19	0	0.64	1.06		2.83	Hodell et al., 2001	C.mundulus
162-982A-24H-5-W 77	223.98	248.17	249.22	7.19691	7.19357	7.24684	0.88	2.1	0	0.64	0.88	0.88	2.74	Hodell et al., 2001	C.wuellerstorfi
162-982A-24H-5-W 77	223.98	248.17	249.22	7.19691	7.19357	7.24684	1.16	2.1	0	0.64	1.16		2.74	Hodell et al., 2001	C.mundulus
162-982C-25H-2-W 20	224	244.66	249.23	7.19714	7.19379	7.1565	1.17	2.09	0	0.64	1.17	1.17	2.73	New data (this study)	C.wuellerstorfi
162-982A-24H-5-W 87	224.08	248.27	249.32	7.19924	7.19571	7.24867	1.24	1.91	0	0.64	1.24	1.24	2.55	Hodell et al., 2001	C.wuellerstorfi
162-982A-24H-5-W 87	224.08	248.27	249.32	7.19924	7.19571	7.24867	1.09	1.99	0	0.64	1.09		2.63	Hodell et al., 2001	C.mundulus
162-982C-25H-2-W 30	224.1	244.76	249.33	7.19947	7.19593	7.15892	1.2	2	0	0.64	1.2	1.2	2.64	New data (this study)	C.wuellerstorfi
162-982A-24H-5-W 97	224.18	248.37	249.42	7.20156	7.19786	7.25051	1.1	1.97	0	0.64	1.1	1.1	2.61	Hodell et al., 2001	C.wuellerstorfi
162-982A-24H-5-W 97	224.18	248.37	249.42	7.20156	7.19786	7.25051	1.04	1.92	0	0.64	1.04		2.56	Hodell et al., 2001	C.mundulus
162-982C-25H-2-W 40	224.2	244.86	249.43	7.2018	7.19807	7.16134	0.99	1.85	0	0.64	0.99	0.99	2.49	New data (this study)	C.wuellerstorfi
162-982A-24H-5-W 107	224.28	248.47	249.52	7.20389	7.2	7.25235	0.75	1.98	0	0.64	0.75	0.75	2.62	Hodell et al., 2001	C.wuellerstorfi
162-982A-24H-5-W 107	224.28	248.47	249.52	7.20389	7.2	7.25235	1.03	2.02	0	0.64	1.03		2.66	Hodell et al., 2001	C.mundulus
162-982C-25H-2-W 50	224.3	244.96	249.53	7.20412	7.20022	7.16376	1.29	2.03	0	0.64	1.29	1.29	2.67	New data (this study)	C.wuellerstorfi
162-982C-25H-2-W 60	224.4	245.06	249.63	7.20645	7.20242	7.16778	1.16	2.08	0	0.64	1.16		2.72	New data (this study)	C.mundulus
162-982C-25H-2-W 60	224.4	245.06	249.63	7.20645	7.20242	7.16778	1.13	2	0	0.64	1.13	1.13	2.64	New data (this study)	C.wuellerstorfi
162-982C-25H-2-W 70	224.5	245.16	249.73	7.20878	7.20462	7.17198	1.31	2.15	0	0.64	1.31	1.31	2.79	New data (this study)	C.wuellerstorfi
162-982C-25H-2-W 80	224.6	245.26	249.83	7.21111	7.20682	7.17618	1.18	2.11	0	0.64	1.18	1.18	2.75	New data (this study)	C.wuellerstorfi
162-982C-25H-2-W 80	224.6	245.26	249.83	7.21111	7.20682	7.17618	1.29	2	0	0.64	1.29	1.29	2.64	New data (this study)	C.wuellerstorfi
162-982C-25H-2-W 90	224.7	245.36	249.93	7.21344	7.20902	7.18038	1.13	2.15	0	0.64	1.13	1.13	2.79	New data (this study)	C.wuellerstorfi
162-982C-25H-2-W 100	224.8	245.46	250.03	7.21577	7.21121	7.18458	1.23	2.14	0	0.64	1.23	1.23	2.78	New data (this study)	C.wuellerstorfi
162-982C-25H-2-W 110	224.9	245.56	250.13	7.21809	7.21341	7.17929	1.18	2.2	0	0.64	1.18	1.18	2.84	New data (this study)	C.wuellerstorfi
162-982C-25H-2-W 120	225	245.66	250.23	7.22042	7.21561	7.18152	1.17	2.17	0	0.64	1.17	1.17	2.81	New data (this study)	C.wuellerstorfi
162-982C-25H-2-W 130	225.1	245.76	250.33	7.22275	7.21781	7.18374	1.09	2.29	0	0.64	1.09		2.93	New data (this study)	C.mundulus
162-982C-25H-2-W 140	225.2	245.86	250.43	7.22508	7.22001	7.18597	1.18	2.31	0	0.64	1.18	1.18	2.95	New data (this study)	C.wuellerstorfi
162-982C-25H-3-W 2	225.32	245.98	250.55	7.22787	7.22265	7.18863	0.97	2.11	0	0.64	0.97	0.97	2.75	New data (this study)	C.wuellerstorfi
162-982C-25H-3-W 10	225.4	246.06	250.63	7.22973	7.22441	7.19041	1.09	2.29	0	0.64	1.09	1.09	2.93	New data (this study)	C.wuellerstorfi
162-982C-25H-3-W 20	225.5	246.16	250.73	7.23206	7.22661	7.19264	1.08	2.25	0	0.64	1.08	1.08	2.89	New data (this study)	C.wuellerstorfi
162-982C-25H-3-W 30	225.6	246.26	250.83	7.23439	7.22881	7.19486	1.08	1.87	0	0.64	1.08		2.51	New data (this study)	C.mundulus
162-982C-25H-3-W 30	225.6	246.26	250.83	7.23439	7.22881	7.19486	1.06	2.23	0	0.64	1.06	1.06	2.87	New data (this study)	C.wuellerstorfi
162-982C-25H-3-W 30	225.6	246.26	250.83	7.23439	7.22881	7.19486	1.19	2.25	0	0.64	1.19	1.19	2.89	New data (this study)	C.wuellerstorfi
162-982C-25H-3-W 40	225.7	246.36	250.93	7.23672	7.23101	7.19709	1.09	2.17	0	0.64	1.09	1.09	2.81	New data (this study)	C.wuellerstorfi
162-982C-25H-3-W 50	225.8	246.46	251.03	7.23905	7.2332	7.19931	1.09	2.12	0	0.64	1.09	1.09	2.76	New data (this study)	C.wuellerstorfi
162-982C-25H-3-W 60	225.9	246.56	251.13	7.24138	7.2354	7.20153	1.33	2.12	0	0.64	1.33	1.33	2.76	New data (this study)	C.wuellerstorfi
162-982C-25H-3-W 70	226	246.66	251.23	7.2437	7.2376	7.20376	1.21	2.09	0	0.64	1.21	1.21	2.73	New data (this study)	C.wuellerstorfi
162-982C-25H-3-W 80	226.1	246.76	251.33	7.24603	7.2398	7.20598	1.07	2.07	0	0.64	1.07	1.07	2.71	New data (this study)	C.wuellerstorfi
162-982C-25H-3-W 90	226.2	246.86	251.43	7.24836	7.242	7.20821	1.01	2.01	0	0.64	1.01	1.01	2.65	New data (this study)	C.wuellerstorfi
162-982C-25H-3-W 100	226.3	246.96	251.53	7.25069	7.24471	7.21043	1.06	2.09	0	0.64	1.06	1.06	2.73	New data (this study)	C.wuellerstorfi
162-982C-25H-3-W 110	226.4	247.06	251.63	7.25302	7.24743	7.21266	1.15	2.16	0	0.64	1.15	1.15	2.8	New data (this study)	C.wuellerstorfi
162-982C-25H-3-W 120	226.5	247.16	251.73	7.25534	7.25014	7.21488	1.15	2.17	0	0.64	1.15	1.15	2.81	New data (this study)	C.wuellerstorfi
162-982C-25H-3-W 130	226.6	247.26	251.83	7.25767	7.25286	7.2171	1.06	2.15	0	0.64	1.06	1.06	2.79	New data (this study)	C.wuellerstorfi
162-982C-25H-3-W 140	226.7	247.36	251.93	7.26	7.25557	7.21933	1.17	2.22	0	0.64	1.17	1.17	2.86	New data (this study)	C.wuellerstorfi
162-982C-25H-3-W 148	226.78	247.44	252.01	7.26186	7.25774	7.22111	1.15	2.23	0	0.64	1.15	1.15	2.87	New data (this study)	C.wuellerstorfi
162-982C-25H-3-W 148	226.78	247.44	252.01	7.26186	7.25774	7.22111	1.08	2.14	0	0.64	1.08	1.08	2.78	New data (this study)	C.wuellerstorfi
162-982C-25H-3-W 148	226.78	247.44	252.01	7.26186	7.25774	7.22111	1.1	2.18	0	0.64	1.1		2.82	New data (this study)	C.mundulus
162-982C-25H-4-W 10	226.9	247.56	252.13	7.26466	7.261	7.22378	1.25	2.18	0	0.64	1.25	1.25	2.82	New data (this study)	C.wuellerstorfi
162-982C-25H-4-W 20	227	247.66	252.23	7.26699	7.26371	7.23623	1.19	2.23	0	0.64	1.19	1.19	2.87	New data (this study)	C.wuellerstorfi
162-982C-25H-4-W 30	227.1	247.76	252.33	7.26931	7.26643	7.23837	1.25	2.07	0	0.64	1.25	1.25	2.71	New data (this study)	C.wuellerstorfi
162-982C-25H-4-W 40	227.2	247.86	252.43	7.27164	7.26914	7.24051	1.39	2.15	0	0.64	1.39	1.39	2.79	New data (this study)	C.wuellerstorfi
162-982C-25H-4-W 50	227.3	247.96	252.53	7.27397	7.27186	7.24265	1.32	2.1	0	0.64	1.32	1.32	2.74	New data (this study)	C.wuellerstorfi
162-982C-25H-4-W 60	227.4	248.06	252.63	7.2763	7.27457	7.24479	1.32	2.04	0	0.64	1.32	1.32	2.68	New data (this study)	C.wuellerstorfi
162-982C-25H-4-W 70	227.5	248.16	252.73	7.27863	7.27729	7.24665	1.25	2.1	0	0.64	1.25	1.25	2.74	New data (this study)	C.wuellerstorfi
162-982C-25H-4-W 80	227.6	248.26	252.83	7.28096	7.28	7.24849	1.12	2	0	0.64	1.12	1.12	2.64	New data (this study)	C.wuellerstorfi
162-982B-25H-3-W 75	227.76	248.35	252.85	7.28142	7.28048	7.25014	1.27	2.06	0	0.64	1.27		2.7	Hodell et al., 2001	C.mundulus
162-982B-25H-3-W 75	227.76	248.35	252.85	7.28142	7.28048	7.25014	1.16	2.03	0	0.64	1.16	1.16	2.67	Hodell et al., 2001	C.wuellerstorfi
162-982C-25H-4-W 90	227.7	248.36	252.93	7.28328	7.28238	7.25033	1.17	2.13	0	0.64	1.17	1.17	2.77	New data (this study)	C.wuellerstorfi
162-982B-25H-3-W 85	227.86	248.45	252.95	7.28375	7.28286	7.25198	1.29	2.16	0	0.64	1.29		2.8	Hodell et al., 2001	C.mundulus
162-982B-25H-3-W 85	227.86	248.45	252.95	7.28375	7.28286	7.25198	1.27	2.14	0	0.64	1.27	1.27	2.78	Hodell et al., 2001	C.wuellerstorfi
162-982C-25H-4-W 100	227.8	248.46	253.03	7.28561	7.28477	7.25216	1.29	2.02	0	0.64	1.29	1.29	2.66	New data (this study)	C.wuellerstorfi
162-982B-25H-3-W 95	227.96	248.55	253.05	7.28608	7.28524	7.25382	1.29	2.04	0	0.64	1.29		2.68	Hodell et al., 2001	C.mundulus
162-982B-25H-3-W 95	227.96	248.55	253.05	7.28608	7.28524	7.25382	1.28	2.09	0	0.64	1.28	1.28	2.73	Hodell et al., 2001	C.wuellerstorfi
162-982C-25H-4-W 110	227.9	248.56	253.13	7.28794	7.28715	7.254	1.31	2.17	0	0.64	1.31	1.31	2.81	New data (this study)	C.wuellerstorfi
162-982B-25H-3-W 105	228.06	248.65	253.15	7.28841	7.28763	7.25565	1.11	2.14	0	0.64	1.11		2.78	Hodell et al., 2001	C.mundulus
162-982B-25H-3-W 105	228.06	248.65	253.15	7.28841	7.28763	7.25565	1.19	2.05	0	0.64	1.19	1.19	2.69	Hodell et al., 2001	C.wuellerstorfi
162-982C-25H-4-W 120	228	248.66	253.23	7.29027	7.28953	7.25584	1.32	2.16	0	0.64	1.32	1.32	2.8	New data (this study)	C.wuellerstorfi
162-982B-25H-3-W 115	228.16	248.75	253.25	7.29073	7.29001	7.25749	1.06	2.15	0	0.64	1.06		2.79	Hodell et al., 2001	C.mundulus
162-982B-25H-3-W 115	228.16	248.75	253.25	7.29073	7.29001	7.25749	1.26	2.06	0	0.64	1.26	1.26	2.7	Hodell et al., 2001	C.wuellerstorfi
162-982C-25H-4-W 130	228.1	248.76	253.33	7.2926	7.29192	7.25767	1.27	2.2	0	0.64	1.27	1.27	2.84	New data (this study)	C.wuellerstorfi
162-982B-25H-3-W 125	228.26	248.85	253.35	7.29306	7.2924	7.25933	1.09	2.26	0	0.64	1.09		2.9	Hodell et al., 2001	C.mundulus
162-982B-25H-3-W 125	228.26	248.85	253.35	7.29306	7.2924	7.25933	1.28	2.21	0	0.64	1.28	1.28	2.85	Hodell et al., 2001	C.wuellerstorfi
162-982C-25H-4-W 140	228.2	248.86	253.43	7.29492	7.2943	7.25951	1.24	2.21	0	0.64	1.24	1.24	2.85	New data (this study)	C.wuellerstorfi
162-982B-25H-3-W 135	228.36	248.95	253.45	7.29539	7.29478	7.26116	1.18	2.24	0	0.64	1.18	1.18	2.88	Hodell et al., 2001	C.wuellerstorfi
162-982C-25H-4-W 148	228.28	248.94	253.51	7.29679	7.29621	7.26098	1.16	2.28	0	0.64	1.16		2.92	New data (this study)	C.mundulus
162-982C-25H-4-W 148	228.28	248.94	253.51	7.29679	7.29621	7.26098	1.23	2.23	0	0.64	1.23	1.23	2.87	New data (this study)	C.wuellerstorfi
162-982C-25H-4-W 148	228.28	248.94	253.51	7.29679	7.29621	7.26098	1.31	2.33	0	0.64	1.31	1.31	2.97	New data (this study)	C.wuellerstorfi
162-982B-25H-3-W 145	228.46	249.05	253.55	7.29772	7.29716	7.263	1.22	2.28	0	0.64	1.22	1.22	2.92	Hodell et al., 2001	C.wuellerstorfi
162-982C-25H-5-W 10	228.4	249.06	253.63	7.29958	7.29907	7.2632	1.26	2.37	0	0.64	1.26	1.26	3.01	New data (this study)	C.wuellerstorfi
162-982B-25H-4-W 5	228.56	249.15	253.65	7.30005	7.29955	7.265	1.23	2.24	0	0.64	1.23		2.88	Hodell et al., 2001	C.mundulus
162-982B-25H-4-W 5	228.56	249.15	253.65	7.30005	7.29955	7.265	1.05	2.19	0	0.64	1.05	1.05	2.83	Hodell et al., 2001	C.wuellerstorfi
162-982C-25H-5-W 20	228.5	249.16	253.73	7.30191	7.30145	7.2652	1.17	2.21	0	0.64	1.17	1.17	2.85	New data (this study)	C.wuellerstorfi
162-982B-25H-4-W 15	228.66	249.25	253.75	7.30237	7.30193	7.267	1.16	2.13	0	0.64	1.16	1.16	2.77	Hodell et al., 2001	C.wuellerstorfi
162-982B-25H-4-W 25	228.76	249.35	253.85	7.3047	7.30431	7.269	1.14	2.2	0	0.64	1.14		2.84	Hodell et al., 2001	C.mundulus
162-982B-25H-4-W 25	228.76	249.35	253.85	7.3047	7.30431	7.269	1.26	2.11	0	0.64	1.26	1.26	2.75	Hodell et al., 2001	C.wuellerstorfi
162-982B-25H-4-W 35	228.86	249.45	253.95	7.30703	7.3067	7.271	1.14	2.17	0	0.64	1.14	1.14	2.81	Hodell et al., 2001	C.wuellerstorfi
162-982B-25H-4-W 45	228.96	249.55	254.05	7.30936	7.30908	7.273	1.11	2.16	0	0.64	1.11		2.8	Hodell et al., 2001	C.mundulus
162-982B-25H-4-W 45	228.96	249.55	254.05	7.30936	7.30908	7.273	1.13	2.1	0	0.64	1.13	1.13	2.74	Hodell et al., 2001	C.wuellerstorfi
162-982B-25H-4-W 55	229.06	249.65	254.15	7.31169	7.31146	7.275	1.31	2.09	0	0.64	1.31		2.73	Hodell et al., 2001	C.mundulus
162-982B-25H-4-W 55	229.06	249.65	254.15	7.31169	7.31146	7.275	1.31	2.13	0	0.64	1.31	1.31	2.77	Hodell et al., 2001	C.wuellerstorfi
162-982B-25H-4-W 65	229.16	249.75	254.25	7.31402	7.31385	7.277	1.32	2.2	0	0.64	1.32		2.84	Hodell et al., 2001	C.mundulus
162-982B-25H-4-W 65	229.16	249.75	254.25	7.31402	7.31385	7.277	1.33	2.06	0	0.64	1.33	1.33	2.7	Hodell et al., 2001	C.wuellerstorfi
162-982B-25H-4-W 75	229.26	249.85	254.35	7.31634	7.31623	7.279	1.2	2.01	0	0.64	1.2		2.65	Hodell et al., 2001	C.mundulus
162-982B-25H-4-W 75	229.26	249.85	254.35	7.31634	7.31623	7.279	1.35	2.03	0	0.64	1.35	1.35	2.67	Hodell et al., 2001	C.wuellerstorfi
162-982B-25H-4-W 85	229.36	249.95	254.45	7.31867	7.31862	7.281	1.17	2.1	0	0.64	1.17		2.74	Hodell et al., 2001	C.mundulus
162-982B-25H-4-W 85	229.36	249.95	254.45	7.31867	7.31862	7.281	1.31	2.04	0	0.64	1.31	1.31	2.68	Hodell et al., 2001	C.wuellerstorfi
162-982B-25H-4-W 95	229.46	250.05	254.55	7.321	7.321	7.283	1.04	1.95	0	0.64	1.04		2.59	Hodell et al., 2001	C.mundulus
162-982B-25H-4-W 95	229.46	250.05	254.55	7.321	7.321	7.283	1.29	1.88	0	0.64	1.29	1.29	2.52	Hodell et al., 2001	C.wuellerstorfi
162-982B-25H-4-W 105	229.56	250.15	254.65	7.32296	7.32286	7.28483	1.21	2.17	0	0.64	1.21		2.81	Hodell et al., 2001	C.mundulus
162-982B-25H-4-W 105	229.56	250.15	254.65	7.32296	7.32286	7.28483	1.19	2.01	0	0.64	1.19	1.19	2.65	Hodell et al., 2001	C.wuellerstorfi
162-982B-25H-4-W 115	229.66	250.25	254.75	7.32492	7.32473	7.28665	1.22	2.07	0	0.64	1.22		2.71	Hodell et al., 2001	C.mundulus
162-982B-25H-4-W 115	229.66	250.25	254.75	7.32492	7.32473	7.28665	1.34	2.06	0	0.64	1.34	1.34	2.7	Hodell et al., 2001	C.wuellerstorfi
162-982B-25H-4-W 125	229.76	250.35	254.85	7.32689	7.32659	7.28848	1.3	2.1	0	0.64	1.3	1.3	2.74	Hodell et al., 2001	C.wuellerstorfi
162-982B-25H-4-W 135	229.86	250.45	254.95	7.32885	7.32845	7.2903	1.24	2.15	0	0.64	1.24	1.24	2.79	Hodell et al., 2001	C.wuellerstorfi
[truncated: 538 more rows]
