# Supplementary material for: Reinforcing the North Atlantic backbone: revision and extension of the composite splice at ODP Site 982
Source: Copernicus journal article supplement (doi:10.5194/cp-2017-108), 2017-09-28
Supplement: Supplementary file 5 [file ST4 - Revised Offsets Site 982 (29.08.2017).xlsx]

## Sheet: Revised offsets Hole 982A
Key	BOLD = changes compared to shipboard			Italics = shipboard splice, but shifted to accommodate new offsets higher in the section.
Core	Depth	Shipboard Offset	Revised Offset	Change in offset	shipboard composite depth	Revised composite depth
	(mbsf [m CSF-A])	(m)	(m)	(m)	(mcd [m CCSF-A])	(rmcd [m rCCSF-A])
162-982A-
1H	0	0	0	0	0	0
2H	8.2	1.3	1.3	0	9.5	9.5
3H	17.7	2.08	2.08	0	19.78	19.78
4H	27.2	2.5	2.5	0	29.7	29.7
5H	36.7	3.93	3.93	0	40.63	40.63
6H	46.2	6.53	6.53	0	52.73	52.73
7H	55.7	7.97	7.97	0	63.67	63.67
8H	65.2	8.78	8.78	0	73.98	73.98
9H	74.7	9.83	9.83	0	84.53	84.53
10H	84.2	11.43	11.43	0	95.63	95.63
11H	93.7	12.35	12.35	0	106.05	106.05
12H	103.2	13.49	13.49	0	116.69	116.69
13H	112.7	14.92	14.82	-0.1	127.62	127.52
14H	122.2	15.82	15.72	-0.1	138.02	137.92
15H	131.7	17.28	16.99	-0.29	148.98	148.69
16H	141.2	18.12	17.97	-0.15	159.32	159.17
17H	150.7	19	18.85	-0.15	169.7	169.55
18H	160.2	19.5	19.35	-0.15	179.7	179.55
19H	169.7	20.78	20.7	-0.08	190.48	190.4
20H	179.2	20.34	21.7	1.36	199.54	200.9
21H	188.7	21.05	22.96	1.91	209.75	211.66
22H	198.2	21.93	23.51	1.58	220.13	221.71
23H	207.7	23.2	24.84	1.64	230.9	232.54
24H	217.2	24.19	25.24	1.05	241.39	242.44
25H	226.7	25.38	27.93	2.55	252.08	254.63
26H	236.2	25.38	29.66	4.28	261.58	265.86
27H	245.7	25.38	34.46	9.08	271.08	280.16

## Sheet: Revised offsets Hole 982B
Key	BOLD = changes compared to shipboard			Italics = shipboard splice, but shifted to accommodate new offsets higher in the section.
Core	Depth	Shipboard Offset	Revised Offset	Change in offset	shipboard composite depth	Revised composite depth
	(mbsf [m CSF-A])	(m)	(m)	(m)	(mcd [m CCSF-A])	(rmcd [m rCCSF-A])
162-982B-
1H	0	0	0	0	0	0
2H	5.5	1.32	1.32	0	6.82	6.82
3H	15	2.16	2.16	0	17.16	17.16
4H	24.5	3.08	3.08	0	27.58	27.58
5H	34	4.08	4.08	0	38.08	38.08
6H	43.5	5.51	5.51	0	49.01	49.01
7H	53	5.77	5.77	0	58.77	58.77
8H	62.5	6.83	6.83	0	69.33	69.33
9H	72	7.94	7.94	0	79.94	79.94
10H	81.5	9.21	9.21	0	90.71	90.71
11H	91	10.07	10.07	0	101.07	101.07
12H	100.5	10.49	10.49	0	110.99	110.99
13H	110	11.54	11.54	0	121.54	121.54
14H	119.5	12.6	12.5	-0.1	132.1	132
15H	129	14.06	13.7	-0.36	143.06	142.7
16H	138.5	14.74	14.45	-0.29	153.24	152.95
17H	148	15.59	15.44	-0.15	163.59	163.44
18H	157.5	16.58	16.43	-0.15	174.08	173.93
19H	167	17.79	17.52	-0.27	184.79	184.52
20H	176.5	18.66	18.37	-0.29	195.16	194.87
21H	186	19.6	19.46	-0.14	205.6	205.46
22H	195.5	19.01	20.62	1.61	214.51	216.12
23H	205	20.42	21.96	1.54	225.42	226.96
24H	214.5	19.45	23.39	3.94	233.95	237.89
25H	224	20.59	25.09	4.5	244.59	249.09
26H	233.5	20.59	26.89	6.3	254.09	260.39
27H	243	20.59	28.42	7.83	263.59	271.42
28H	249.3	20.59	29.6	9.01	269.89	278.9
29H	258.9	20.59	29.67	9.08	279.49	288.57
30H		20.59	29.67	9.08
31H	278.2	20.59	29.67	9.08	298.79	307.87
32H	287.8	20.59	29.67	9.08	308.39	317.47
33H	297.4	20.59	29.67	9.08	317.99	327.07
34H	307.1	20.59	29.67	9.08	327.69	336.77
35H	316.7	20.59	29.67	9.08	337.29	346.37
36H	326.3	20.59	29.67	9.08	346.89	355.97
37H	336	20.59	29.67	9.08	356.59	365.67
38H	345.6	20.59	29.67	9.08	366.19	375.27
39H	355.2	20.59	29.67	9.08	375.79	384.87
40H	364.9	20.59	29.67	9.08	385.49	394.57
41H	374.5	20.59	29.67	9.08	395.09	404.17
42H	384.1	20.59	29.67	9.08	404.69	413.77
43H	393.8	20.59	29.67	9.08	414.39	423.47
44H	403.4	20.59	29.67	9.08	423.99	433.07
45H	413	20.59	29.67	9.08	433.59	442.67
46H	422.6	20.59	29.67	9.08	443.19	452.27
47H	432.2	20.59	29.67	9.08	452.79	461.87
48H	441.8	20.59	29.67	9.08	462.39	471.47
49H	451.4	20.59	29.67	9.08	471.99	481.07
50H	461	20.59	29.67	9.08	481.59	490.67
51H	470.6	20.59	29.67	9.08	491.19	500.27
52H	480.2	20.59	29.67	9.08	500.79	509.87
53H	489.7	20.59	29.67	9.08	510.29	519.37
54H	499.3	20.59	29.67	9.08	519.89	528.97
55H	508.9	20.59	29.67	9.08	529.49	538.57
56H	518.5	20.59	29.67	9.08	539.09	548.17
57H	528.1	20.59	29.67	9.08	548.69	557.77
58H	537.7	20.59	29.67	9.08	558.29	567.37
59H		20.59	29.67	9.08
60H	557	20.59	29.67	9.08	577.59	586.67
61H	566.7	20.59	29.67	9.08	587.29	596.37
62H	576.4	20.59	29.67	9.08	596.99	606.07
63H		20.59	29.67	9.08
64H		20.59	29.67	9.08
65H		20.59	29.67	9.08

## Sheet: Revised offsets Hole 982C
Key	BOLD = changes compared to shipboard			Italics = shipboard splice, but shifted to accommodate new offsets higher in the section.
Core	Depth	Shipboard Offset	Revised Offset	Change in offset	shipboard composite depth	Revised composite depth
	(mbsf [m CSF-A])	(m)	(m)	(m)	(mcd [m CCSF-A])	(rmcd [m rCCSF-A])
162-982C-
1H	0	0.15	0.15	0	0.15	0.15
2H	3.8	-0.8	0.8	1.6	3	4.6
3H	13.3	-0.02	0.02	0.04	13.28	13.32
4H	22.8	3.52	3.52	0	26.32	26.32
5H	32.3	3.26	3.26	0	35.56	35.56
6H	41.8	4.58	4.58	0	46.38	46.38
7H	51.3	5.65	5.65	0	56.95	56.95
8H	60.8	5.79	5.79	0	66.59	66.59
9H	70.3	5.82	5.82	0	76.12	76.12
10H	79.8	7.19	7.19	0	86.99	86.99
11H	89.3	8.17	8.17	0	97.47	97.47
12H	98.8	9.05	9.05	0	107.85	107.85
13H	108.3	10.45	10.45	0	118.75	118.75
14H	117.8	11.13	11.13	0	128.93	128.93
15H	127.3	13.08	12.92	-0.16	140.38	140.22
16H	136.8	13.88	13.52	-0.36	150.68	150.32
17H	146.3	14.45	14.3	-0.15	160.75	160.6
18H	155.8	15.89	15.74	-0.15	171.69	171.54
19H	165.3	16.43	16.16	-0.27	181.73	181.46
20H	174.8	18.41	17.97	-0.44	193.21	192.77
21H	184.3	19.9	18.95	-0.95	204.2	203.25
22H	193.8	18.88	20.39	1.51	212.68	214.19
23H	203.3	19.79	21.33	1.54	223.09	224.63
24H	212.8	19.6	23.54	3.94	232.4	236.34
25H	222.3	20.66	25.23	4.57	242.96	247.53
26H	231.8	20.66	26.96	6.3	252.46	258.76
27H	241.3	20.66	29.74	9.08	261.96	271.04

## Sheet: Revised offsets Hole 982D
Key	BOLD = changes compared to shipboard			Italics = shipboard splice, but shifted to accommodate new offsets higher in the section.
Core	Depth	Shipboard Offset	Revised Offset	Change in offset	shipboard composite depth	Revised composite depth
	(mbsf [m CSF-A])	(m)	(m)	(m)	(mcd [m CCSF-A])	(rmcd [m rCCSF-A])
162-982D-
1H	20	2.18	2.18	0	22.18	22.18
