# Supplementary material for: Reinforcing the North Atlantic backbone: revision and extension of the composite splice at ODP Site 982
Source: Copernicus journal article supplement (doi:10.5194/cp-2017-108), 2017-09-28
Supplement: Supplementary file 7 [file ST5 - Revised Splice Site 982 (29.08.2017).xlsx]

## Sheet: Splice tie table Site 982
Key		BOLD = new splice tie point		Italics = old splice tie point with revised composite depth
Full Splice
Compilation for splice tie points
	Depth				Depth
Hole, core, section, interval (cm)	(mbsf [m CSF-A])	(rmcd [m revised CCSF-A])		Hole, core, section, interval (cm)	(mbsf [m CSF-A])	(rmcd [m revised CCSF-A])
162-				162-
U982A-1H-6, 18	7.68	7.68	Tie to	U982B-2H-1, 86	6.36	7.68
U982B-2H-7, 2	14.52	15.84	Tie to	U982C-3H-2, 106	15.86	15.84
U982C-3H-4, 90	18.7	18.68	Tie to	U982B-3H-2, 2	16.52	18.68
U982B-3H-5, 140	22.4	24.56	Tie to	U982D-1H-2, 120	22.63	24.56
U982D-1H-5, 29	26.22	28.15	Tie to	U982B-4H-1, 57	25.07	28.15
U982B-4H-6, 74	32.74	35.82	Tie to	U982C-5H-1, 26	32.56	35.82
U982C-5H-3, 58	35.88	39.14	Tie to	U982B-5H-1, 106	35.06	39.14
U982B-5H-6, 90	42.4	46.48	Tie to	U982C-6H-1, 10	41.9	46.48
U982C-6H-3, 66	45.46	50.04	Tie to	U982B-6H-1, 103	44.53	50.04
U982B-6H-6, 98	51.98	57.49	Tie to	U982A-6H-4, 26	50.96	57.49
U982A-6H-5, 98	53.18	59.71	Tie to	U982B-7H-1, 94	53.94	59.71
U982B-7H-5, 146	60.46	66.23	Tie to	U982A-7H-2, 106	58.26	66.23
U982A-7H-4, 138	61.58	69.55	Tie to	U982B-8H-1, 22	62.72	69.55
U982B-8H-5, 3	68.53	75.36	Tie to	U982A-8H-1, 138	66.58	75.36
U982A-8H-5, 98	72.18	80.96	Tie to	U982B-9H-1, 102	73.02	80.96
U982B-9H-6, 131	80.81	88.75	Tie to	U982C-10H-2, 26	81.56	88.75
U982C-10H-7, 4	88.84	96.03	Tie to	U982B-10H-4, 82	86.82	96.03
U982B-10H-6, 26	89.26	98.47	Tie to	U982A-10H-2, 134	87.04	98.47
U982A-10H-6, 82	92.52	103.95	Tie to	U982B-11H-2, 138	93.88	103.95
U982B-11H-6, 74	99.24	109.31	Tie to	U982A-11H-3, 26	96.96	109.31
U982A-11H-5, 24	99.94	112.29	Tie to	U982B-12H-1, 130	101.8	112.29
U982B-12H-7, 12	109.62	120.11	Tie to	U982A-12H-3, 42	106.62	120.11
U982A-12H-5, 125	110.45	123.94	Tie to	U982B-13H-2, 90	112.4	123.94
U982B-13H-6, 74	118.24	129.78	Tie to	U982A-13H-2, 76	114.96	129.78
U982A-13H-4, 122	118.42	133.24	Tie to	U982B-14H-1, 124	120.74	133.24
U982B-14H-7, 34	128.44	140.94	Tie to	U982C-15H-1, 72	128.02	140.94
U982C-15H-3, 26	130.56	143.48	Tie to	U982B-15H-1, 78	129.78	143.48
U982B-15H-6, 50	137	150.7	Tie to	U982A-15H-2, 51	133.71	150.7
U982A-15H-5, 76	138.44	155.43	Tie to	U982B-16H-2, 98	140.98	155.43
U982B-16H-6, 82	146.82	161.27	Tie to	U982A-16H-2, 60	143.3	161.27
U982A-16H-6, 84	149.54	167.51	Tie to	U982B-17H-3, 107	152.07	167.51
U982B-17H-6, 18	155.68	171.12	Tie to	U982A-17H-2, 7	152.27	171.12
U982A-17H-6, 51	158.71	177.56	Tie to	U982B-18H-3, 63	161.13	177.56
U982B-18H-6, 66	165.66	182.09	Tie to	U982A-18H-2, 104	162.74	182.09
U982A-18H-6, 52	168.22	187.57	Tie to	U982B-19H-3, 5	170.05	187.57
U982B-19H-7, 8	176.08	193.6	Tie to	U982C-20H-1, 83	175.63	193.6
U982C-20H-4, 7	179.37	197.34	Tie to	U982B-20H-2, 97	178.97	197.34
U982B-20H-6, 2	184.02	202.39	Tie to	U982A-20H-1, 149	180.69	202.39
U982A-20H-6, 53	187.23	208.93	Tie to	U982B-21H-3, 47	189.47	208.93
U982B-21H-6, 42	193.9	213.36	Tie to	U982A-21H-2, 20	190.4	213.36
U982A-21H-6, 81	197.01	219.97	Tie to	U982C-22H-4, 128	199.58	219.97
U982C-22H-6, 91	202.21	222.6	Tie to	U982A-22H-1, 89	199.09	222.6
U982A-22H-5, 111	205.31	228.82	Tie to	U982B-23H-2, 36	206.86	228.82
U982B-23H-5, 112	212.12	234.08	Tie to	U982A-23H-2, 4	209.24	234.08
U982A-23H-6, 12	215.32	240.16	Tie to	U982B-24H-2, 77	216.77	240.16
U982B-24H-5, 39	220.89	244.28	Tie to	U982A-24H-2, 34	219.04	244.28
U982A-24H-6, 33	225.03	250.27	Tie to	U982B-25H-1, 118	225.18	250.27
U982B-25H-5, 136	231.36	256.45	Tie to	U982A-25H-2, 32	228.52	256.45
U982A-25H-6, 30	234.5	262.43	Tie to	U982B-26H-2, 54	235.54	262.43
U982B-26H-5, 101	240.51	267.4	Tie to	U982A-26H-2, 4	237.74	267.4
U982A-26H-6, 33	244.03	273.69	Tie to	U982C-27H-2, 115	243.95	273.69
U982C-27H-7, 4	250.34	280.08	Tie to	U982B-28H-1, 118	250.48	280.08
U982B-62X-1, 39	576.79	597.38
