# Supplementary material for: Reinforcing the North Atlantic backbone: revision and extension of the composite splice at ODP Site 982
Source: Copernicus journal article supplement (doi:10.5194/cp-2017-108), 2017-09-28
Supplement: Supplementary file 9 [file ST7 - Tuning overview (29.08.2017).xlsx]

## Sheet: Tuning tie points for 982
IOPD ID	mid Depth mbsf	mid Depth rmcd	Age (Ma)	Tie type
162-982A-12H-4-A/W 95	108.65	122.14	4.534	Minimal
162-982B-13H-5-A/W 55	116.55	128.09	4.698	Minimal
162-982B-14H-4-A/W 115	125.15	137.65	4.876	Fine
162-982B-14H-7-A/W 19	128.29	140.79	4.914	Minimal
162-982C-15H-3-A/W 23	130.53	143.45	4.954	Fine
162-982B-15H-2-A/W 45	130.95	144.65	4.975	Fine
162-982B-15H-3-A/W 25	132.25	145.95	4.999	Fine
162-982B-15H-4-A/W 145	134.95	148.65	5.036	Fine
162-982A-15H-3-A/W 35	135.05	152.04	5.08	Fine
162-982A-15H-4-A/W 67	136.85	153.84	5.118	Fine
162-982B-16H-2-A/W 98	140.98	155.43	5.16	Fine
162-982B-16H-4-A/W 48	143.48	157.93	5.201	Minimal
162-982A-16H-3-A/W 108	145.28	163.25	5.321	Minimal
162-982B-17H-4-A/W 38	152.88	168.32	5.446	Fine
162-982A-17H-2-A/W 68	152.88	171.73	5.519	Fine
162-982A-17H-3-A/W 118	154.88	173.73	5.587	Minimal
162-982A-17H-6-A/W 28	158.48	177.33	5.653	Fine
162-982B-18H-4-A/W 78	162.78	179.21	5.69	Fine
162-982B-18H-6-A/W 28	165.28	181.71	5.731	Minimal
162-982A-18H-4-A/W 68	165.38	184.73	5.782	Fine
162-982A-18H-5-A/W 68	166.88	186.23	5.815	Fine
162-982B-19H-3-A/W 21	170.21	187.73	5.848	Minimal
162-982B-19H-4-A/W 28	171.78	189.3	5.898	Fine
162-982B-19H-5-A/W 68	173.68	191.2	5.938	Minimal
162-982B-19H-6-A/W 133	175.83	193.35	5.99	Fine
162-982C-20H-2-A/W 58	176.88	194.85	6.014	Fine
162-982C-20H-3-A/W 38	178.18	196.15	6.053	Fine
162-982B-20H-3-A/W 78	180.28	198.65	6.108	Minimal
162-982A-20H-3-A/W 58	182.78	204.48	6.205	Fine
162-982A-20H-5-A/W 8	185.28	206.98	6.266	Fine
162-982B-21H-3-A/W 77	189.77	209.23	6.299	Minimal
162-982B-21H-5-A/W 78	192.76	212.22	6.384	Fine
162-982A-21H-2-A/W 138	191.58	214.54	6.427	Fine
162-982A-21H-3-A/W 128	192.98	215.94	6.468	Fine
162-982A-21H-5-A/W 48	195.18	218.14	6.508	Fine
162-982A-22H-2-A/W 128	200.98	224.49	6.676	Minimal
162-982A-22H-4-A/W 118	203.88	227.39	6.76	Fine
162-982B-23H-2-A/W 113	207.63	229.59	6.792	Fine
162-982B-23H-4-A/W 118	210.68	232.64	6.844	Minimal
162-982A-23H-2-A/W 108	210.28	235.12	6.883	Fine
162-982B-24H-4-A/W 8	219.08	242.47	7.053	Minimal
162-982B-24H-4-A/W 98	219.98	243.37	7.076	Fine
162-982A-24H-4-A/W 48	222.18	247.42	7.155	Minimal
162-982A-24H-5-A/W 108	224.28	249.52	7.2	Fine
162-982B-25H-2-A/W 84	226.34	251.43	7.242	Fine
162-982B-25H-3-A/W 74	227.74	252.83	7.28	Fine
162-982B-25H-4-A/W 96	229.46	254.55	7.321	Minimal
162-982A-25H-2-A/W 62	228.82	256.75	7.362	Fine
162-982A-25H-3-A/W 103	230.73	258.66	7.409	Fine
162-982A-25H-5-A/W 12	232.82	260.75	7.443	Fine
162-982B-26H-2-A/W 66	235.66	262.55	7.478	Minimal
162-982B-26H-4-A/W 6	238.06	264.95	7.523	Fine
162-982A-26H-2-A/W 19	237.89	267.55	7.595	Fine
162-982A-26H-3-A/W 49	239.69	269.35	7.646	Minimal
162-982A-26H-4-A/W 30	241	270.66	7.684	Fine
162-982A-26H-5-A/W 112	243.32	272.98	7.767	Fine
162-982C-27H-3-A/W 94	245.24	274.98	7.809	Minimal
162-982C-27H-4-A/W 124	247.04	276.78	7.857	Fine
162-982C-27H-5-A/W 125	248.55	278.29	7.902	Fine
162-982B-28H-4-A/W 16	253.96	283.56	7.974	Fine
162-982B-28H-5-A/W 56	255.86	285.46	8.015	Minimal
